# Supplementary material
Source: HighWire-hosted journal article supplement (doi:10.1101/rna.079865.123)
Supplement: Supplemental_Figure_Legends.docx [file Supplemental_Figure_Legends.docx]

**Supplemental Figure Legends**

**Fig S1**. Silencing KDM5B inhibited proliferation and induced apoptosis in some AML cells. MOLM-14 (**A-D**), MV-4-11 (**E-H**) and OCL- AML3 cells (**I-L**) were transduced with lentivirus expressing scramble (shScr) and shRNAs. The relative mRNA and protein levels of KDM5B were measured by RT-qPCR (A, E, and I) and Western blotting (B, F, and J), respectively. The cell proliferation was measured by CCK-8 assay (C, G, and K) and apoptosis by Annexin V staining (D, H, and L). Quantification from three biological repeats. Data represent the mean + SD (A, B, D, E, F, H, I, J, and L) or ± SD (C, G, and K). *P < 0.05, **P < 0.01, and ***P < 0.001, by Student’s t-test (A-L).

**Fig S2**. Silencing KDM5B had a minor effect on cell proliferation and apoptosis in some blood cancer cells. P493 (**A-D**), THP-1 (**E-H**) and K562 cells (**I-L**) were transduced with lentivirus expressing scramble (shScr) and shRNAs. The relative mRNA and protein levels of KDM5B were measured by RT-qPCR (A, E, and I) and Western blotting (B, F, and J), respectively. The cell proliferation was measured by CCK-8 assay (C, G, and K) and apoptosis by Annexin V staining (D, H, and L). Quantification from three biological repeats. Data represent the mean + SD (A, B, D, E, F, H, I, J, and L) or ± SD (C, G, and K). *P < 0.05, **P < 0.01, and ***P < 0.001, by Student’s t-test (A-L).

**Fig S3**. The expression of interferon response genes upon silencing KDM5B in MOLM-14 (**A**-**B**), MV-4-11 (**C**-**D**), P493 (**E**-**F**), and THP-1 (**G**-**H**) cells. The mRNA levels were quantified using data from three biological replicates. The protein levels of the indicated items were measured in two biological repeats, and a representative from one repeat was presented. Data represent the mean + SD (A, C, E, and G). *P < 0.05, **P < 0.01, and ***P < 0.001, by Student’s t-test (A, C, E, and G).

**Fig S4**. Evaluate the effect of silencing KDM5B and miR-140-3p inhibitor on BCL2 expression and cell proliferation. The effect of silencing KDM5B on the expression of BLC2 in MOLM-13 (**A**), MOLM-14 (**B**), and MV-4-11 (**C**) cells. (**D**) miR-140-3p inhibitor and NC were transfected into control (shScr) and KDM5B KD MOLM-14 cells, respectively. BCL2 expression was measured by western blotting (bottom). (**E**) CCK8 assay to measure the proliferation of the cells treated in (D). (A-E) The data from three (A-C) and two (D-E) biological repeats was used for quantification. Data represent the mean + SD (A-C) or ± SD (E). *P < 0.05, **P < 0.01, and ***P < 0.001, by Student’s t-test (A-C) and 1-factor ANOVA with a post hoc t-test (D-E).

**Fig S5**. Evaluation of the effect of KDM5B inhibitors on cell proliferation and apoptosis. (**A-B**) MOLM-13 cells were treated with vehicle (DMSO) and increasing doses of PBIT (A) or GSK467 (B) for 24 hrs, respectively. A CCK-8 assay was performed to measure cell proliferation. The quantification was performed using data from three biological repeats. (C) PBMCs obtained from HDs (n=5) were treated with DMSO and 10 μM PBIT for 24 hrs in the Methocult M3434 medium. Apoptotic cells were analyzed using Annexin V staining and flow cytometry analysis. Data represent the mean + SD (A-C). *P < 0.05, **P < 0.01, and ***P < 0.001, by Student’s t-test (A-C).

**Fig S6**. Combined silencing of KDM5B and BCL2 inhibitors significantly promotes cleavage of caspase-9 and inhibits cell proliferation. (**A**) Evaluation of cell senescence by β-galactosidase staining in control and KDM5B KD MOLM-13 cells. (**B**) Evaluation of the cleavage of caspase-9 in control and KDM5B KD MOLM-13 cells with or without Venetoclax (0.5 μM, 48 hrs). A representative from one of the two repeats was presented. (**C**) The control and KDM5B KD MOLM-13 cells were treated with DMSO and BCL2 inhibitor Venetoclax (0.5 μM) for the indicated time, and the cell proliferation was measured by CCK-8 assay. Quantification from two biological repeats. Data represent the mean ± SD (C). *P < 0.05, **P < 0.01, and ***P < 0.001, by 1-factor ANOVA with a post hoc t-test (B-C).
