# Supplementary material
Source: HighWire-hosted journal article supplement (doi:10.1101/rna.079865.123)
Supplement: Supplemental_Table_S3.docx [file Supplemental_Table_S3.docx]

| App. | Species | gene | Forward start | Forward primer (5’-3’) | Backward start | Reverse primer (5’-3’) |
| --- | --- | --- | --- | --- | --- | --- |
| RT | human | KDM5A |  | AAAGTGGGTAGTCGCTTGGG |  | CTGCACACCCATAAGGCTCA |
| RT | human | KDM5B |  | GCCCTCAGACACATCCTATTC |  | AGTCCACCTCATCTCCTTCT |
| RT | human | KDM5C |  | GGTCCGACGATTTCCTACCG |  | TCCACCACAATCGCGGGT |
| RT | human | KDM5D |  | CCACAGCATCCCCCTTAGAC |  | CCCACCTCCACTTTGCTCAT |
| RT | human | BCL2 |  | ACATCGCCCTGTGGATGACT |  | CCGTACAGTTCCACAAAGGC |
| RT | human | STAT1 |  | ATCAGGCTCAGTCGGGGAATA |  | TGGTCTCGTGTTCTCTGTTCT |
| RT | human | STAT2 |  | CTGCTAGGCCGATTAACTACCC |  | TCTGATGCAGGCTTTTTGCTG |
| RT | human | IRF7 |  | CCCACGCTATACCATCTACCT |  | GATGTCGTCATAGAGGCTGTTG |
| RT | human | IRF9 |  | GCCCTACAAGGTGTATCAGTTG |  | TGCTGTCGCTTTGATGGTACT |
| RT | human | OASL |  | CTTCTCCCACACTCACATCTATC |  | CTCCCACCATCAGGATTCTTC |
| RT | human | OAS1 |  | TGTCCAAGGTGGTAAAGGGTG |  | CCGGCGATTTAACTGATCCTG |
| RT | human | OAS2 |  | CTCAGAAGCTGGGTTGGTTTAT |  | ACCATCTCGTCGATCAGTGTC |
| RT | human | IFI6 |  | GGTCTGCGATCCTGAATGGG |  | TCACTATCGAGATACTTGTGGGT |
| RT | human | IFIT1 |  | GAAACTTCGGAGAAAGGCATTAG |  | CATAGTACTCCAGGGCTTCATT |
| RT | human | IFIT3 |  | CTGCTGTGCAACATGGTTTAG |  | GATACATTCTGTGGTTGGTCTTTG |
| ChIP/CUT&Tag | human | miR-140-3p | TSS-368 | TGCCCTGTAGGTAGTGAAGAG | TSS-163 | GCCCTCAACAGAGCACATATT |
| ChIP/CUT&Tag | human | Interg (Or2j3) | TSS+87 | GGCCTCATCTGGAAGTAGTTATC | TSS+201 | GTCCAGGTATGACAGGATGATG |
| ChIP/CUT&Tag | human | IRF7 | TSS+244 | CCACCTCCCATTACCCACTT | TSS+413 | ATTATTGGATGCGACCAGCG |
| ChIP/CUT&Tag | human | IFIT1 | TSS+162 | AAGAGGGCCAGCTCCATTTT | TSS+263 | AGGAGGCATTTTGGGGTGAA |
| ChIP/CUT&Tag | human | ERG2 | TSS-361 | TTTTCCTGAGGGCACGATGT | TSS-192 | GAATCAAGGCGCACCCTTTC |
| Mimics NC | human |  | sense | UUCUCCGAACGUGUCACGUTT | Antisense | ACGUGACACGUUCGGAGAATT |
| Mimics | human |  | sense | UACCACAGGGUAGAACCACGG | Antisense | GUGGUUCUACCCUGUGGUAUU |
| Inhibitor NC | human |  |  | CAGUACUUUUGUGUAGUACAA |  |  |
| Inhibitor | human |  |  | CCGUGGUUCUACCCUGUGGUA |  |  |
