# Supplementary material
Source: HighWire-hosted journal article supplement (doi:10.1101/rna.079865.123)
Supplement: Supplemental_Table_S4.xlsx [file Supplemental_Table_S4.xlsx]

## Sheet: miRNA_expr_with_pval
miRNA	Sh1_1	Sh1_2	Scr_1	Scr_2	logFC	logCPM	F	PValue	FDR
novel_1	0	0	64.0272	70.7759	-9.9885	5.22296	327.504	4.88258e-11	2.1402e-08
novel_65	65.6373	59.7396	0	0	9.74911	4.91423	298.404	9.06865e-11	2.1402e-08
novel_2	0	0	56.1966	50.839	-9.65563	4.90815	269.827	1.76716e-10	2.78034e-08
novel_62	43.3568	34.5482	0	0	9.06513	4.24834	195.209	1.47672e-09	1.74253e-07
hsa-miR-223-3p	304.099	321.01	638.43	698.289	-1.23273	8.96875	96.5091	6.86529e-08	6.48083e-06
novel_66	20.474	16.5543	0	0	7.99571	3.24203	82.6841	3.24219e-07	2.55053e-05
hsa-miR-148a-3p	17941.3	16211.7	28567.2	30681.9	-0.930246	14.5313	53.9341	2.56941e-06	0.000173251
novel_72	13.2479	12.2358	0	0	7.45766	2.76266	51.5331	4.99746e-06	0.00029485
novel_28	0	0	12.8976	8.47317	-7.33929	2.83188	44.1204	1.16758e-05	0.000572949
novel_68	9.03266	13.6753	0	0	7.28385	2.60353	43.802	1.21388e-05	0.000572949
novel_61	12.0435	9.3568	0	0	7.2105	2.5571	42.8359	1.36779e-05	0.000586907
hsa-miR-140-3p	1303.71	1273.96	691.863	678.851	0.775656	9.92901	42.3622	3.27878e-05	0.00128965
novel_71	6.02177	11.5161	0	0	6.90847	2.29149	31.4839	6.66618e-05	0.00242034
hsa-miR-29b-3p	18977.6	18445.1	23788.7	27823.9	-0.599961	14.455	21.7708	0.000312001	0.0105189
hsa-let-7c-5p	933.977	979.585	1441.3	1263	-0.634487	10.1875	26.576	0.000564655	0.0177678
hsa-miR-7-5p	15135.1	14086.3	19196.2	19677.7	-0.547193	14.0668	20.3875	0.000655894	0.0193489
novel_39	0	0	4.60628	4.4858	-6.11772	1.8858	18.3424	0.000775134	0.0215214
hsa-miR-30d-5p	4604.85	4684.16	3152.07	2586.31	0.559844	11.8608	19.618	0.00104207	0.0273253
hsa-miR-142-3p	198020	192846	227303	274643	-0.497167	17.7785	12.5833	0.00296334	0.0736157
hsa-miR-18a-5p	1661.41	1681.34	1938.32	2394.42	-0.510692	10.9178	15.1844	0.00399667	0.0943215
hsa-miR-301a-3p	231.236	223.843	299.408	361.854	-0.674631	8.1462	22.2521	0.00670949	0.150804
hsa-miR-6859-5p	2.40871	2.87902	0	0	5.21253	1.17104	9.19731	0.00903802	0.18977
hsa-miR-194-5p	511.851	475.037	292.038	310.018	0.577766	8.62252	20.5726	0.00924728	0.18977
hsa-miR-6511b-3p	1.20435	4.31852	0	0	5.24005	1.17568	8.47724	0.0114775	0.216933
hsa-miR-100-5p	0	0.719754	5.52753	1.99369	-3.38431	1.77643	8.15911	0.0120987	0.216933
hsa-miR-6724-5p	14.4523	23.0321	5.52753	3.98738	1.81945	3.59885	17.5532	0.01228	0.216933
hsa-miR-30b-5p	2580.93	2411.18	1510.86	1835.19	0.441247	11.0148	11.4237	0.0124093	0.216933
hsa-miR-340-5p	523.292	482.235	682.65	607.576	-0.494188	9.17802	15.8226	0.0129202	0.217797
hsa-miR-4742-3p	0	0	2.76377	1.49527	-5.0538	1.22843	7.60075	0.015549	0.249375
hsa-miR-361-3p	817.154	771.576	573.481	474.996	0.464783	9.35439	13.299	0.0158501	0.249375
novel_20	79.4874	85.6507	40.5352	26.9148	1.15404	5.85187	23.1733	0.0189884	0.285341
hsa-miR-378c	589.531	578.682	433.451	324.473	0.489248	8.901	11.9091	0.0193452	0.285341
hsa-miR-199a-5p	0	0	1.84251	1.99369	-4.89975	1.14439	6.80635	0.0207508	0.2968
hsa-miR-1254	2.40871	1.43951	0	0	4.79429	0.972443	6.39525	0.0242267	0.336323
hsa-miR-339-3p	210.16	241.837	145.098	115.634	0.656929	7.46654	16.5267	0.0257446	0.347185
hsa-miR-107	1497.61	1691.42	1261.66	938.529	0.400013	10.3852	7.50773	0.0276299	0.362258
novel_18	73.4656	91.4087	39.1533	32.3974	1.06547	5.8761	22.3154	0.0289015	0.36869
hsa-miR-2355-3p	0.602177	0	1.84251	3.48895	-2.90817	1.46546	5.40228	0.0347075	0.431104
hsa-miR-183-3p	1.20435	2.15926	0	0	4.56478	0.867209	5.20918	0.0387935	0.469501
hsa-miR-34a-5p	18918	18761.8	14082.8	13319.8	0.324072	13.9809	7.42962	0.0432887	0.494312
hsa-miR-590-3p	498	469.999	539.395	630.005	-0.408151	9.07354	10.0942	0.0437527	0.494312
hsa-miR-26b-5p	8432.89	8398.09	9740.43	9488.46	-0.327694	13.1444	7.88528	0.0445486	0.494312
hsa-miR-3688-3p	7.22613	2.87902	0.921255	1.49527	1.90199	2.02677	5.12494	0.0454513	0.494312
hsa-miR-339-5p	1898.06	2067.13	1599.3	1220.64	0.356463	10.7184	6.75614	0.0460799	0.494312
hsa-miR-199b-5p	1375.97	1337.3	1655.04	1506.23	-0.355583	10.5281	8.78343	0.0486724	0.510519
hsa-miR-146a-5p	12379.6	11532.6	9118.58	8504.57	0.305222	13.3336	6.49449	0.0597948	0.613547
hsa-miR-199a-3p	4197.78	4266.7	5170.08	4376.15	-0.308615	12.1422	6.28044	0.0672386	0.651624
hsa-miR-130a-3p	331.8	298.698	367.12	400.731	-0.419065	8.46352	10.0313	0.0683315	0.651624
hsa-miR-660-3p	0	0.719754	2.30314	1.99369	-2.59012	1.31543	3.8502	0.0687477	0.651624
hsa-miR-25-5p	74.0678	52.542	38.2321	20.9337	0.963697	5.54316	9.39986	0.0701729	0.651624
hsa-miR-20a-5p	40663.8	43613.5	31306.6	31507.7	0.288031	15.1579	5.47647	0.0704085	0.651624
hsa-miR-378a-3p	1771.61	1792.91	1491.05	1105	0.32263	10.5801	5.19401	0.072781	0.651882
hsa-miR-181a-3p	1433.78	1576.98	1993.6	1430.97	-0.320879	10.658	4.41632	0.0733824	0.651882
novel_10	6.02177	3.59877	6.90941	15.9495	-1.35494	3.26389	6.20119	0.0745798	0.651882
hsa-miR-199b-3p	2098.59	2133.35	2584.58	2188.07	-0.308609	11.1425	6.23637	0.0784472	0.673219
hsa-miR-95-3p	243.882	240.398	164.905	150.025	0.485316	7.63624	11.254	0.0848129	0.702596
hsa-miR-378a-5p	291.454	300.857	216.956	177.937	0.449223	7.9403	9.66505	0.0848474	0.702596
hsa-miR-660-5p	366.124	350.52	455.561	391.76	-0.376407	8.62278	8.38178	0.0895514	0.728763
hsa-miR-4487	2.40871	2.87902	0	0.996844	2.16391	1.33928	3.19662	0.0941971	0.753577
hsa-miR-142-5p	31083.8	29448	30244.8	35941.7	-0.264948	14.9565	4.03024	0.0964028	0.758369
hsa-miR-454-3p	1382	1338.74	1541.26	1503.24	-0.297542	10.4998	6.34972	0.0993274	0.768566
novel_35	10.237	7.19754	18.8857	15.9495	-1.11989	3.87602	8.89891	0.1051	0.783217
hsa-miR-3662	6.02177	7.91729	1.84251	2.99053	1.3679	2.46428	4.34752	0.10575	0.783217
hsa-miR-486-5p	65.0351	56.8605	34.0864	26.9148	0.863104	5.52158	12.5765	0.106199	0.783217
hsa-miR-17-5p	4757.2	4569	4339.11	6188.41	-0.311593	12.2841	3.26638	0.109057	0.791921
hsa-miR-1307-5p	435.374	503.828	540.777	530.321	-0.32635	8.98241	6.83394	0.112768	0.806462
hsa-miR-454-5p	9.63483	5.03828	18.8857	10.4669	-1.11366	3.65635	6.0409	0.116653	0.815433
hsa-miR-192-5p	646.738	624.746	456.021	474.498	0.314933	9.09844	6.86991	0.117478	0.815433
hsa-let-7a-3p	161.383	146.83	182.409	200.366	-0.44715	7.45262	8.56195	0.129928	0.886393
hsa-miR-550a-3p	18.0653	8.63705	6.90941	4.4858	1.09352	3.37781	4.93745	0.133101	0.886393
hsa-miR-29c-3p	13035.3	12531.6	10103.9	9595.12	0.240886	13.4591	4.16348	0.135802	0.886393
hsa-miR-629-5p	222.203	237.519	160.298	151.52	0.423799	7.58687	8.52482	0.13701	0.886393
hsa-miR-664a-3p	10.237	7.91729	14.7401	18.94	-1.01556	3.85777	7.30407	0.141134	0.886393
hsa-miR-760	1.80653	1.43951	0	0.498422	2.33927	0.970952	2.40799	0.141752	0.886393
hsa-miR-193b-3p	36.7328	40.3062	19.807	17.9432	0.8902	4.86271	10.0621	0.142329	0.886393
hsa-miR-423-5p	352.876	374.992	278.219	241.236	0.350752	8.27894	6.85523	0.143404	0.886393
hsa-miR-1301-3p	7.8283	3.59877	2.30314	1.99369	1.26681	2.29459	3.10768	0.144602	0.886393
hsa-miR-205-5p	3.01089	6.47778	1.84251	1.49527	1.31502	2.03211	2.74362	0.153234	0.927262
hsa-miR-150-5p	81.2939	109.403	59.421	53.8296	0.61298	6.24655	8.60923	0.157354	0.939022
hsa-miR-1275	2.40871	2.87902	1.38188	0	1.66575	1.41224	2.12133	0.166065	0.939022
hsa-let-7i-3p	11.4414	9.3568	5.0669	3.98738	1.05557	3.05567	4.21119	0.167362	0.939022
hsa-miR-6514-5p	1.20435	2.87902	0.460628	0.498422	1.7881	1.16666	2.10292	0.167797	0.939022
hsa-miR-548d-3p	2.40871	1.43951	2.76377	5.98106	-1.26304	2.14521	2.53657	0.170253	0.939022
hsa-miR-25-3p	4887.27	5129.69	4147.03	3626.02	0.230483	12.1118	3.63806	0.171947	0.939022
hsa-miR-335-3p	100.564	115.161	134.503	137.066	-0.468938	6.95269	7.74404	0.172285	0.939022
hsa-miR-27b-3p	1012.86	988.942	1084.78	1084.57	-0.251403	10.0323	4.49794	0.173649	0.939022
hsa-miR-342-5p	67.4438	46.784	76.0036	83.2365	-0.610242	6.13759	7.42925	0.17407	0.939022
hsa-miR-642a-5p	3.61306	6.47778	1.84251	1.99369	1.21755	2.12802	2.62613	0.175072	0.939022
hsa-miR-148b-3p	633.49	608.192	731.016	621.034	-0.257658	9.34782	4.28016	0.18115	0.951281
hsa-miR-155-5p	12108.6	12205.6	14432.4	11270.3	-0.214853	13.6132	2.62395	0.181388	0.951281
hsa-miR-3680-5p	1.20435	2.87902	0.921255	0	1.79941	1.1652	1.85829	0.193123	0.994555
hsa-miR-6507-5p	3.01089	5.75803	1.84251	1.49527	1.20532	1.97888	2.28452	0.194296	0.994555
hsa-miR-1271-5p	2.40871	1.43951	0.921255	0	1.76835	1.16058	1.83341	0.195961	0.994555
novel_25	21.6784	24.4716	13.3582	9.96844	0.84302	4.17067	6.28966	0.199168	0.999527
hsa-miR-26a-5p	22407.6	23355.3	19496.5	16688.2	0.203554	14.3158	2.63267	0.203075	0.999527
hsa-miR-195-5p	33.7219	43.1852	21.1889	19.9369	0.763002	4.90395	7.26329	0.205586	0.999527
hsa-let-7f-1-3p	0.602177	1.43951	2.30314	2.49211	-1.34339	1.54108	1.83686	0.213656	0.999527
hsa-miR-99a-3p	60.2177	64.7778	43.7596	29.4069	0.635714	5.63996	6.64067	0.217897	0.999527
hsa-miR-1249-3p	1.20435	1.43951	0.460628	0	2.05268	0.861821	1.65377	0.218126	0.999527
novel_33	10.237	7.91729	17.5038	12.4605	-0.848007	3.7568	4.72856	0.222251	0.999527
hsa-miR-548e-3p	10.8392	9.3568	17.5038	15.4511	-0.834349	3.88492	5.34549	0.222537	0.999527
hsa-miR-184	5.41959	2.15926	5.0669	8.9716	-0.982279	2.75499	2.34999	0.22459	0.999527
hsa-miR-548o-3p	1.20435	1.43951	2.76377	2.99053	-1.21932	1.73199	1.92669	0.230132	0.999527
hsa-miR-1260b	15.0544	18.7136	8.2913	8.9716	0.824706	3.75201	4.81879	0.231619	0.999527
hsa-miR-744-5p	5.41959	5.75803	11.0551	7.97475	-0.896686	3.15741	3.27476	0.2373	0.999527
hsa-miR-30e-5p	12782.4	12138.6	10134.7	9784.02	0.18796	13.4467	2.53188	0.244536	0.999527
hsa-miR-3173-5p	4.81742	5.75803	4.14565	0.498422	1.00896	2.25226	1.52326	0.244795	0.999527
hsa-miR-664b-3p	2.40871	1.43951	3.68502	3.98738	-1.0817	2.05071	1.91526	0.245798	0.999527
hsa-miR-320a	657.577	653.536	555.056	463.034	0.229775	9.18094	3.30111	0.246129	0.999527
hsa-miR-30b-3p	6.62395	8.63705	2.76377	4.4858	0.924291	2.69918	2.36874	0.249382	0.999527
hsa-miR-4775	1.20435	2.15926	0.460628	0.498422	1.52766	1.07055	1.41941	0.252183	0.999527
hsa-miR-125b-5p	7882.5	8586.66	6586.98	3498.42	0.573745	12.6809	2.10052	0.254845	0.999527
hsa-miR-365a-3p	671.427	650.657	539.856	490.946	0.223886	9.19587	3.44604	0.257185	0.999527
hsa-miR-365b-3p	671.427	650.657	539.856	490.946	0.223886	9.19587	3.44604	0.257185	0.999527
hsa-miR-548j-3p	0.602177	0.719754	1.38188	1.99369	-1.39556	1.23784	1.38656	0.257503	0.999527
hsa-miR-5582-3p	0.602177	0.719754	1.38188	1.99369	-1.39556	1.23784	1.38656	0.257503	0.999527
hsa-miR-636	3.01089	1.43951	0	1.49527	1.42488	1.33331	1.37669	0.259402	0.999527
hsa-miR-210-3p	72.8634	86.3705	46.5234	54.328	0.521003	6.02833	6.02049	0.259977	0.999527
hsa-miR-15a-3p	10.8392	9.3568	17.5038	13.4574	-0.744822	3.83153	4.02585	0.277984	0.999527
hsa-miR-212-5p	1.20435	2.15926	0.921255	0	1.53893	1.06908	1.26112	0.279257	0.999527
hsa-miR-3605-3p	1.20435	2.15926	0.921255	0	1.53893	1.06908	1.26112	0.279257	0.999527
hsa-miR-455-5p	1.80653	2.15926	0.921255	0.498422	1.25245	1.24959	1.252	0.280933	0.999527
hsa-miR-3607-3p	4.81742	3.59877	1.84251	1.99369	0.983219	2.02249	1.65936	0.281055	0.999527
hsa-miR-92a-3p	11739.4	14811.1	11688	7376.65	0.342835	13.4664	1.56418	0.282052	0.999527
hsa-miR-19b-3p	63054.6	61594.4	48037.5	52890.5	0.168598	15.778	1.75067	0.287666	0.999527
hsa-miR-3074-5p	1.80653	0.719754	4.14565	0.996844	-1.09228	1.66501	1.20956	0.288918	0.999527
hsa-miR-320c	515.464	512.465	454.179	347.899	0.222929	8.8337	2.5817	0.292183	0.999527
hsa-miR-148b-5p	29.5067	20.1531	38.6927	31.4006	-0.625913	4.98159	4.51313	0.295455	0.999527
hsa-let-7e-5p	1.80653	1.43951	4.14565	1.99369	-1.019	1.84379	1.41212	0.296841	0.999527
hsa-miR-3615	4.21524	9.3568	3.22439	3.48895	0.850355	2.56824	1.75264	0.298348	0.999527
hsa-miR-95-5p	3.61306	2.87902	0.921255	1.99369	1.00568	1.74963	1.37136	0.300713	0.999527
hsa-miR-140-5p	313.132	293.66	301.711	352.883	-0.244693	8.31099	3.17827	0.303667	0.999527
hsa-let-7c-3p	10.237	14.3951	16.122	19.9369	-0.688214	4.04862	3.76849	0.303983	0.999527
hsa-miR-27a-3p	1239.88	1182.56	1211.91	1297.39	-0.186361	10.2723	2.384	0.307041	0.999527
hsa-miR-21-3p	66.2395	66.9371	47.4446	37.8801	0.506187	5.78293	5.13383	0.307053	0.999527
hsa-miR-330-3p	3.01089	0	3.22439	2.99053	-1.06433	1.84215	1.12127	0.308697	0.999527
hsa-miR-301b-3p	18.0653	23.7519	28.5589	29.9053	-0.6212	4.73018	4.44179	0.312469	0.999527
hsa-let-7i-5p	1051.4	1030.69	1119.33	1037.71	-0.186263	10.0539	2.42535	0.312713	0.999527
hsa-miR-497-5p	19.2697	19.4334	11.0551	10.9653	0.674747	3.99601	3.89726	0.313003	0.999527
hsa-let-7f-5p	24462.8	23356	25066	23552.4	-0.159122	14.5595	1.70617	0.318948	0.999527
hsa-miR-22-3p	67.4438	82.0519	52.9722	45.3564	0.466614	5.96119	4.66544	0.322135	0.999527
hsa-miR-486-3p	0.602177	5.75803	0	1.99369	1.45786	1.56953	1.10875	0.323715	0.999527
hsa-miR-190b	9.03266	6.47778	7.37004	15.9495	-0.709639	3.46615	2.20052	0.323837	0.999527
hsa-miR-147b	1.20435	3.59877	0.460628	1.49527	1.09057	1.41589	1.03932	0.324291	0.999527
hsa-miR-106a-5p	3.61306	1.43951	3.22439	5.48264	-0.867346	2.23288	1.31674	0.326763	0.999527
hsa-miR-941	33.1197	28.7902	48.3659	34.8895	-0.559575	5.24489	4.31715	0.327526	0.999527
hsa-miR-320b	544.368	556.37	497.938	373.816	0.201324	8.94203	2.05244	0.330983	0.999527
hsa-miR-4521	190.89	159.785	121.606	138.063	0.299243	7.25538	3.30281	0.333423	0.999527
hsa-miR-7976	4.21524	2.87902	6.44879	4.98422	-0.800455	2.56675	1.63423	0.333842	0.999527
hsa-miR-16-1-3p	120.435	129.556	91.2043	86.7254	0.354138	6.74409	4.1146	0.335424	0.999527
hsa-miR-29a-5p	25.8936	38.147	41.9171	42.8643	-0.544021	5.27444	4.10036	0.337839	0.999527
hsa-miR-182-5p	578.09	530.459	444.045	436.618	0.197106	8.95506	2.58264	0.339987	0.999527
hsa-miR-5690	1.80653	0.719754	2.30314	2.49211	-0.98069	1.60678	1.09206	0.342653	0.999527
hsa-miR-106b-5p	376.963	356.998	323.361	450.075	-0.211419	8.56656	1.71175	0.345714	0.999527
hsa-miR-28-3p	3.61306	1.43951	1.84251	0.498422	0.94836	1.54934	0.92097	0.352577	0.999527
hsa-miR-545-3p	7.8283	5.75803	0.921255	6.47949	0.75025	2.63111	0.940459	0.353133	0.999527
hsa-miR-6844	0.602177	0.719754	1.38188	1.49527	-1.17825	1.15102	0.915298	0.35402	0.999527
hsa-miR-429	3.01089	0	4.60628	1.49527	-1.04675	1.83829	0.931643	0.355075	0.999527
hsa-miR-3607-5p	3.01089	0.719754	0	1.49527	1.20043	1.24789	0.86091	0.36853	0.999527
hsa-miR-186-3p	3.61306	7.91729	8.2913	8.47317	-0.687899	3.05442	1.59829	0.370078	0.999527
hsa-miR-502-5p	0.602177	2.15926	3.68502	0.996844	-0.924343	1.6071	0.827612	0.377485	0.999527
hsa-miR-625-3p	196.31	203.69	161.68	143.047	0.256647	7.46134	2.92796	0.382422	0.999527
hsa-miR-423-3p	111.403	128.836	102.72	71.7728	0.324616	6.69958	2.60479	0.384251	0.999527
hsa-miR-16-2-3p	221.601	266.309	173.657	202.858	0.236314	7.75467	2.37448	0.386433	0.999527
hsa-miR-106b-3p	197.514	243.997	198.991	140.057	0.243926	7.60726	1.75163	0.389052	0.999527
hsa-miR-26b-3p	13.2479	10.7963	15.6613	16.9463	-0.568302	3.95844	2.60845	0.398941	0.999527
hsa-miR-501-3p	3.61306	2.87902	1.38188	1.99369	0.796833	1.80648	0.937378	0.403502	0.999527
hsa-miR-191-3p	19.8718	20.1531	26.2558	25.9179	-0.516541	4.61336	3.10271	0.406095	0.999527
hsa-miR-133a-3p	0	1.43951	1.84251	0.996844	-1.1488	1.15186	0.727671	0.40718	0.999527
hsa-miR-3199	0	1.43951	1.84251	0.996844	-1.1488	1.15186	0.727671	0.40718	0.999527
hsa-miR-424-5p	2.40871	0.719754	2.30314	2.99053	-0.817975	1.7325	0.83265	0.409379	0.999527
hsa-miR-625-5p	102.37	97.1668	80.1492	63.798	0.336064	6.43159	2.96556	0.409602	0.999527
hsa-miR-3667-5p	2.40871	1.43951	3.22439	2.99053	-0.784875	1.90157	0.929883	0.410052	0.999527
hsa-miR-4474-3p	1.80653	1.43951	0.921255	0.498422	0.990958	1.15913	0.708478	0.413291	0.999527
hsa-miR-1295a	23.4849	30.9494	21.1889	13.4574	0.510981	4.52294	2.43205	0.41444	0.999527
hsa-miR-1293	1.20435	2.15926	0.460628	0.996844	0.997134	1.16289	0.702224	0.415314	0.999527
hsa-miR-223-5p	22.2806	19.4334	25.3345	28.4101	-0.497752	4.66143	2.8588	0.420644	0.999527
hsa-miR-1-3p	1.20435	1.43951	0	6.47949	-1.37024	1.79815	0.757847	0.420827	0.999527
hsa-miR-345-5p	93.3375	107.963	70.0154	76.2586	0.323338	6.44756	2.88939	0.425262	0.999527
hsa-miR-221-3p	1.20435	5.03828	10.5944	0.996844	-1.06145	2.52673	0.750598	0.425898	0.999527
hsa-miR-579-3p	1.20435	2.15926	2.30314	2.99053	-0.784335	1.7368	0.816066	0.428747	0.999527
hsa-miR-641	2.40871	8.63705	4.14565	1.99369	0.664212	2.3801	0.791503	0.430138	0.999527
hsa-miR-3940-3p	3.61306	2.15926	4.60628	3.98738	-0.679389	2.27384	0.932955	0.435196	0.999527
hsa-miR-30a-3p	2.40871	1.43951	0.921255	0.996844	0.847317	1.32904	0.649607	0.435857	0.999527
hsa-miR-105-5p	12.0435	7.19754	14.7401	10.9653	-0.539978	3.65759	1.69981	0.438886	0.999527
hsa-miR-1294	1.80653	2.15926	0.460628	1.49527	0.853181	1.33273	0.62996	0.439861	0.999527
hsa-miR-148a-5p	15.6566	17.9938	22.1101	20.9337	-0.491052	4.35978	2.46226	0.443272	0.999527
hsa-miR-144-3p	2.40871	0	1.84251	2.49211	-0.854361	1.53942	0.616632	0.444825	0.999527
hsa-miR-320d	362.511	371.393	337.179	253.198	0.178691	8.36929	1.48531	0.445885	0.999527
hsa-miR-3653-3p	3.01089	3.59877	3.22439	0	0.841316	1.80338	0.616846	0.448951	0.999527
hsa-miR-361-5p	190.89	223.843	251.503	183.918	-0.20666	7.74195	1.53147	0.450397	0.999527
hsa-miR-3691-5p	0.602177	1.43951	1.38188	1.99369	-0.849197	1.32335	0.598402	0.45132	0.999527
hsa-miR-33b-3p	2.40871	7.91729	5.98816	7.97475	-0.59215	2.85467	0.890414	0.452794	0.999527
hsa-miR-3065-5p	0.602177	1.43951	1.84251	1.49527	-0.841268	1.32194	0.591319	0.453959	0.999527
hsa-miR-92a-1-5p	29.5067	37.4272	17.5038	26.9148	0.452156	4.83336	2.15672	0.454791	0.999527
novel_57	28.3023	29.5099	0	15.4511	1.76808	4.20852	0.810336	0.455352	0.999527
novel_17	0	10.0766	2.30314	0	1.84899	1.93996	0.701305	0.459547	0.999527
hsa-miR-146b-5p	554.003	557.089	601.58	518.857	-0.147334	9.12848	1.41365	0.461302	0.999527
hsa-miR-7974	22.2806	12.9556	15.2007	7.97475	0.473252	3.96339	1.33176	0.479196	0.999527
hsa-miR-23b-3p	319.154	371.393	286.971	271.64	0.169055	8.28539	1.58782	0.479632	0.999527
hsa-miR-18b-5p	7.8283	15.8346	5.52753	9.47002	0.508544	3.3895	1.08344	0.479982	0.999527
hsa-miR-6511a-3p	9.63483	2.87902	1.84251	5.98106	0.568645	2.62036	0.571801	0.480431	0.999527
hsa-miR-664a-5p	4.81742	3.59877	5.52753	5.98106	-0.5696	2.63766	0.896	0.483201	0.999527
hsa-miR-22-5p	5.41959	7.19754	3.68502	3.98738	0.567979	2.59358	0.884633	0.48326	0.999527
hsa-miR-4484	2.40871	3.59877	1.84251	1.49527	0.675109	1.7478	0.647873	0.484215	0.999527
hsa-miR-32-5p	1049.59	1026.37	972.846	1092.54	-0.128459	10.0192	1.08847	0.486975	0.999527
novel_32	52.9916	42.4655	51.5903	59.3122	-0.34922	5.73118	2.28771	0.487161	0.999527
hsa-miR-505-5p	3.01089	2.87902	2.30314	0.996844	0.669953	1.74432	0.615095	0.487461	0.999527
hsa-miR-627-3p	2.40871	0.719754	1.38188	3.48895	-0.694196	1.67435	0.536522	0.487926	0.999527
novel_5	18.6675	25.9111	24.4133	29.9053	-0.424109	4.7025	1.94475	0.490382	0.999527
hsa-miR-6859-3p	4.81742	0	0	1.99369	1.19084	1.48073	0.512137	0.501526	0.999527
hsa-miR-139-5p	1.20435	0	0.921255	1.49527	-0.953057	1.05771	0.472529	0.502415	0.999527
hsa-miR-23a-3p	982.753	1120.66	936.917	819.406	0.124037	9.91078	0.962543	0.504492	0.999527
hsa-miR-3657	2.40871	6.47778	4.14565	7.47633	-0.539204	2.64826	0.66573	0.506675	0.999527
hsa-miR-143-3p	7.22613	5.75803	7.83067	8.9716	-0.496582	3.12239	1.0058	0.509959	0.999527
hsa-miR-374b-5p	47.572	41.7457	51.5903	51.3375	-0.338198	5.63052	2.20709	0.512506	0.999527
hsa-miR-181a-2-3p	72.2613	82.0519	97.1924	72.2712	-0.27126	6.36434	1.74521	0.515108	0.999527
hsa-miR-378d	149.942	169.862	140.031	112.145	0.206218	7.16301	1.50103	0.517825	0.999527
hsa-miR-153-3p	4.81742	1.43951	4.60628	3.98738	-0.547939	2.31321	0.564309	0.523632	0.999527
hsa-miR-3913-5p	21.6784	18.7136	16.5826	10.9653	0.416393	4.1625	1.45961	0.523818	0.999527
hsa-miR-484	38.5393	57.5803	39.614	28.9085	0.348326	5.38457	1.61629	0.526397	0.999527
hsa-miR-1226-3p	1.80653	0.719754	1.84251	1.99369	-0.668251	1.47185	0.452076	0.527545	0.999527
hsa-miR-200c-5p	1.80653	0.719754	1.84251	1.99369	-0.668251	1.47185	0.452076	0.527545	0.999527
hsa-miR-92b-3p	24.6893	55.421	33.6258	22.429	0.371003	5.11276	0.815641	0.527827	0.999527
novel_16	10.237	7.19754	6.90941	4.4858	0.478322	3.04179	0.827202	0.527888	0.999527
hsa-miR-21-5p	4753.59	5075.7	5401.78	4230.61	-0.105876	12.249	0.641548	0.528173	0.999527
hsa-miR-769-3p	4.21524	7.19754	4.14565	2.99053	0.517881	2.48782	0.651337	0.52974	0.999527
hsa-miR-98-5p	63.8308	68.3766	76.0036	69.7791	-0.276888	6.14839	1.92615	0.534495	0.999527
hsa-miR-193a-5p	6.02177	5.75803	5.98816	1.49527	0.503236	2.54986	0.532588	0.536613	0.999527
hsa-miR-548k	1.20435	1.43951	1.84251	1.99369	-0.650291	1.47407	0.44635	0.538507	0.999527
hsa-miR-500a-3p	21.6784	24.4716	17.5038	14.4542	0.39145	4.34879	1.54082	0.539787	0.999527
hsa-miR-1277-5p	0.602177	1.43951	0	3.48895	-0.873013	1.3276	0.394761	0.542569	0.999527
novel_48	9.03266	6.47778	0	6.97791	1.02792	2.70114	0.454338	0.54355	0.999527
hsa-miR-671-5p	54.1959	45.3445	41.9171	30.4037	0.326896	5.4515	1.64572	0.545123	0.999527
hsa-miR-29a-3p	17825	18027	16105.4	14426.3	0.0964616	14.0146	0.635061	0.547016	0.999527
hsa-miR-130b-5p	9.63483	13.6753	16.5826	11.4637	-0.406981	3.81653	1.12164	0.551312	0.999527
hsa-miR-590-5p	58.4112	53.2618	35.0077	47.3501	0.303889	5.62201	1.58888	0.556547	0.999527
hsa-miR-7-1-3p	75.8743	79.8927	90.7436	77.2554	-0.244676	6.36397	1.6099	0.557077	0.999527
hsa-miR-92b-5p	6.02177	2.15926	1.84251	3.48895	0.505989	2.15836	0.426017	0.563589	0.999527
hsa-miR-502-3p	15.0544	17.2741	12.4369	9.96844	0.388863	3.8673	1.16556	0.565209	0.999527
hsa-miR-141-5p	4.81742	2.87902	7.37004	2.49211	-0.475876	2.49787	0.467615	0.565793	0.999527
hsa-miR-96-5p	220.397	285.022	218.337	194.883	0.152809	7.8436	0.979378	0.566665	0.999527
hsa-miR-186-5p	2345.48	2325.52	1961.35	2004.65	0.100366	11.0732	0.737098	0.567865	0.999527
hsa-miR-15a-5p	2162.42	2386.7	2312.35	2123.78	-0.0996215	11.1344	0.686869	0.569758	0.999527
hsa-miR-26a-1-3p	8.43048	11.5161	13.3582	10.4669	-0.395889	3.6056	0.956444	0.572312	0.999527
hsa-miR-191-5p	4666.27	4630.9	4346.02	3583.16	0.0947238	12.0686	0.568533	0.574965	0.999527
hsa-miR-4791	7.22613	14.3951	9.67318	4.98422	0.406999	3.31799	0.64514	0.575234	0.999527
hsa-miR-296-5p	24.6893	41.7457	26.2558	21.4321	0.33615	4.86977	1.16221	0.576613	0.999527
hsa-miR-3150b-3p	2.40871	1.43951	3.68502	1.49527	-0.53605	1.79036	0.379726	0.579156	0.999527
hsa-miR-155-3p	14.4523	17.9938	12.8976	24.9211	-0.358516	4.23186	0.933484	0.581042	0.999527
novel_4	0	38.147	37.7715	49.8422	-1.36431	5.05709	0.411926	0.581563	0.999527
hsa-miR-598-3p	37.335	37.4272	30.8621	23.4258	0.325564	5.04788	1.40004	0.581669	0.999527
hsa-miR-1270	1.20435	0.719754	1.84251	0.996844	-0.642803	1.23784	0.316918	0.581861	0.999527
hsa-miR-365a-5p	9.63483	6.47778	5.52753	5.48264	0.417979	2.9673	0.613459	0.585557	0.999527
hsa-miR-103a-3p	13812.1	14856.4	14110.9	10462.9	0.0875092	13.696	0.377499	0.585602	0.999527
hsa-miR-3136-5p	0.602177	1.43951	1.38188	1.49527	-0.6319	1.24155	0.308355	0.586955	0.999527
hsa-miR-6733-5p	1.20435	0.719754	0.460628	2.49211	-0.668097	1.24214	0.306131	0.588293	0.999527
hsa-miR-4485-5p	0.602177	1.43951	0.921255	1.99369	-0.640331	1.24299	0.305777	0.588507	0.999527
hsa-miR-628-3p	3.61306	1.43951	4.14565	2.49211	-0.490571	2.052	0.382471	0.588815	0.999527
hsa-miR-101-3p	26891.4	24720.7	23832	26030.6	-0.0858706	14.6316	0.466239	0.590467	0.999527
hsa-miR-181b-3p	115.016	117.32	126.673	114.139	-0.18717	6.90321	1.23192	0.591055	0.999527
hsa-let-7g-5p	2352.71	2353.59	1978.86	2034.06	0.0941918	11.087	0.64896	0.591695	0.999527
hsa-miR-152-3p	65.0351	64.0581	46.984	51.3375	0.256986	5.84756	1.4383	0.596892	0.999527
hsa-miR-532-3p	4.81742	10.7963	5.0669	5.48264	0.409311	2.89903	0.503858	0.597187	0.999527
hsa-miR-30d-3p	86.1113	90.689	85.6767	100.183	-0.208319	6.52444	1.2284	0.598408	0.999527
hsa-miR-132-5p	3.61306	7.19754	4.14565	2.99053	0.436633	2.45079	0.438617	0.598477	0.999527
hsa-miR-548c-3p	1.80653	2.87902	1.38188	1.49527	0.531965	1.55375	0.335582	0.599242	0.999527
hsa-miR-548ax	3.61306	0.719754	1.84251	3.98738	-0.492867	1.9046	0.307058	0.600465	0.999527
hsa-miR-545-5p	4.21524	4.31852	5.98816	4.4858	-0.426853	2.57383	0.487343	0.601733	0.999527
hsa-miR-3912-3p	7.8283	2.15926	7.37004	4.98422	-0.408114	2.78285	0.396377	0.605465	0.999527
hsa-miR-548e-5p	13.2479	7.91729	12.4369	12.4605	-0.357748	3.68042	0.788539	0.605834	0.999527
hsa-miR-219b-5p	1.80653	1.43951	0.460628	1.49527	0.591706	1.2473	0.275437	0.60745	0.999527
hsa-miR-643	0	3.59877	3.22439	1.49527	-0.599816	1.67769	0.279095	0.607736	0.999527
hsa-miR-451a	1.80653	3.59877	0.921255	2.49211	0.500571	1.68845	0.306808	0.608736	0.999527
hsa-miR-128-3p	1321.78	1339.46	1177.82	1093.54	0.093051	10.2655	0.612229	0.610008	0.999527
hsa-miR-500b-5p	4.21524	5.75803	5.98816	5.98106	-0.401919	2.73589	0.480004	0.614149	0.999527
hsa-miR-29c-5p	116.822	128.116	135.425	115.135	-0.168869	6.96824	0.984043	0.6202	0.999527
hsa-miR-505-3p	55.4003	43.905	35.929	39.3753	0.265424	5.47601	1.17793	0.62095	0.999527
hsa-miR-125b-2-3p	25.8936	32.3889	23.492	19.4385	0.302012	4.7079	1.04815	0.621848	0.999527
hsa-miR-130b-3p	162.588	161.945	169.511	158	-0.148521	7.36105	0.973891	0.622109	0.999527
hsa-miR-642a-3p	2.40871	2.87902	0.460628	2.99053	0.478669	1.68761	0.255424	0.624215	0.999527
hsa-miR-3609	3.01089	1.43951	0.921255	1.99369	0.494057	1.5507	0.271593	0.624913	0.999527
hsa-miR-331-5p	3.01089	2.87902	1.84251	5.48264	-0.430986	2.15541	0.306869	0.626899	0.999527
hsa-miR-19a-3p	6855.18	6531.77	5601.69	7274.97	-0.0803521	12.682	0.336731	0.627049	0.999527
hsa-miR-27b-5p	8.43048	10.0766	12.8976	8.47317	-0.345143	3.48486	0.64599	0.627727	0.999527
hsa-miR-627-5p	10.237	10.0766	5.98816	8.47317	0.353709	3.27444	0.585566	0.628267	0.999527
hsa-miR-4485-3p	4.21524	4.31852	2.30314	3.48895	0.418907	2.20695	0.349589	0.629334	0.999527
hsa-miR-374a-3p	337.821	305.176	257.03	283.104	0.11658	8.20982	0.731121	0.632074	0.999527
hsa-miR-500a-5p	4.81742	7.91729	7.37004	7.47633	-0.364963	3.01035	0.472483	0.633931	0.999527
hsa-miR-24-3p	466.687	490.872	499.32	434.624	-0.0996494	8.88923	0.630526	0.633956	0.999527
hsa-miR-181b-5p	1082.11	1280.44	1415.05	914.604	-0.115128	10.1974	0.254207	0.635554	0.999527
hsa-miR-659-5p	2.40871	2.15926	3.22439	2.49211	-0.4449	1.90497	0.311443	0.636047	0.999527
hsa-let-7f-2-3p	12.0435	11.5161	12.4369	14.4542	-0.323435	3.79182	0.776641	0.636301	0.999527
hsa-miR-193b-5p	43.3568	37.4272	35.0077	25.9179	0.272737	5.18228	1.01247	0.636691	0.999527
hsa-miR-138-5p	2.40871	0.719754	1.84251	0	0.604124	1.24072	0.224476	0.642639	0.999527
hsa-miR-99a-5p	605.188	667.212	654.091	423.16	0.104879	9.19582	0.239872	0.643454	0.999527
hsa-let-7g-3p	4.21524	1.43951	1.38188	2.49211	0.438238	1.80087	0.255812	0.644183	0.999527
hsa-miR-10b-5p	1.80653	0.719754	0	1.49527	0.653523	1.0659	0.221573	0.644679	0.999527
hsa-miR-3176	1.80653	0.719754	0	1.49527	0.653523	1.0659	0.221573	0.644679	0.999527
hsa-miR-3613-5p	1.80653	1.43951	0	1.99369	0.581987	1.24874	0.214389	0.650157	0.999527
hsa-miR-188-5p	13.8501	20.8729	11.0551	14.4542	0.302278	3.99352	0.689197	0.650352	0.999527
hsa-miR-32-3p	44.5611	37.4272	36.8502	51.3375	-0.238853	5.45588	0.859526	0.658296	0.999527
hsa-miR-15b-3p	770.185	747.824	702.457	762.087	-0.0838872	9.54519	0.485301	0.658321	0.999527
hsa-miR-4766-3p	3.01089	0.719754	2.76377	1.99369	-0.427015	1.73252	0.224909	0.661756	0.999527
novel_15	14.4523	11.5161	12.4369	0	0.913098	3.39087	0.2418	0.665445	0.999527
hsa-miR-548u	1.20435	0	0.460628	1.49527	-0.65488	0.960322	0.192805	0.66691	0.999527
hsa-miR-30a-5p	24.0871	25.1914	31.7833	21.9306	-0.259477	4.75648	0.752231	0.670427	0.999527
hsa-miR-769-5p	164.394	143.231	170.432	136.568	-0.13079	7.27639	0.616626	0.67077	0.999527
hsa-miR-1292-5p	2.40871	1.43951	3.68502	0.996844	-0.397813	1.73203	0.19037	0.683291	0.999527
hsa-miR-29b-1-5p	30.711	31.6692	23.9526	23.9243	0.245237	4.83081	0.774439	0.684754	0.999527
hsa-let-7a-5p	45331.3	47989.6	47679.6	41157.7	-0.0643073	15.4744	0.250042	0.685493	0.999527
novel_3	54.1959	49.663	46.5234	61.8043	-0.195588	5.76451	0.709718	0.694192	0.999527
hsa-miR-362-3p	7.8283	5.75803	8.2913	6.97791	-0.29435	3.07677	0.336915	0.697019	0.999527
hsa-miR-29b-2-5p	18.0653	23.7519	23.492	21.4321	-0.241971	4.51635	0.620047	0.699358	0.999527
hsa-miR-3143	3.01089	3.59877	5.52753	1.99369	-0.328328	2.23536	0.193909	0.705334	0.999527
hsa-miR-628-5p	0.602177	7.91729	5.0669	4.4858	-0.348358	2.48168	0.150006	0.707993	0.999527
hsa-miR-374b-3p	6.62395	4.31852	7.83067	4.4858	-0.293977	2.81636	0.251738	0.70808	0.999527
hsa-miR-4677-3p	1.80653	3.59877	4.14565	1.99369	-0.340834	2.00982	0.180706	0.709164	0.999527
hsa-miR-425-5p	947.225	1188.31	1233.56	829.374	-0.086041	10.0363	0.153056	0.710983	0.999527
hsa-miR-589-3p	3.61306	4.31852	3.22439	2.49211	0.322668	2.15955	0.202581	0.712739	0.999527
hsa-miR-5692a	0	1.43951	0	1.99369	-0.622918	0.966487	0.141161	0.713156	0.999527
hsa-miR-126-3p	43.3568	30.2297	35.929	21.9306	0.215164	5.08181	0.484157	0.714613	0.999527
hsa-miR-582-3p	2.40871	0.719754	1.84251	1.99369	-0.368257	1.543	0.146717	0.719293	0.999527
hsa-miR-192-3p	2.40871	4.31852	2.30314	2.49211	0.327527	1.96953	0.175702	0.720725	0.999527
hsa-miR-19b-1-5p	73.4656	90.689	61.7241	72.2712	0.154853	6.23362	0.569272	0.721077	0.999527
hsa-miR-548q	2.40871	2.15926	2.30314	2.99053	-0.331611	1.85369	0.167859	0.726443	0.999527
hsa-miR-1278	3.01089	0	1.84251	1.99369	-0.38492	1.5408	0.124678	0.729122	0.999527
hsa-miR-652-5p	13.2479	12.9556	8.75192	11.4637	0.238484	3.65587	0.374714	0.730743	0.999527
hsa-miR-9-5p	14.4523	25.9111	19.3464	11.9621	0.221645	4.23296	0.351385	0.732043	0.999527
hsa-miR-219a-5p	13.8501	15.8346	16.122	15.4511	-0.225658	4.04489	0.445598	0.733994	0.999527
hsa-miR-576-5p	28.9045	29.5099	37.7715	23.4258	-0.201983	4.96178	0.459583	0.734818	0.999527
hsa-miR-197-3p	4.21524	8.63705	4.60628	4.98422	0.26732	2.72088	0.196522	0.736268	0.999527
hsa-miR-335-5p	745.495	705.359	664.686	716.232	-0.0641148	9.47005	0.282525	0.736469	0.999527
hsa-miR-4662a-5p	3.01089	4.31852	4.60628	3.48895	-0.286761	2.32227	0.178967	0.736751	0.999527
hsa-miR-34a-3p	37.9372	38.147	29.0195	31.4006	0.196476	5.13044	0.561682	0.736817	0.999527
hsa-miR-200b-3p	10.237	10.0766	10.5944	4.98422	0.243192	3.3256	0.255135	0.737082	0.999527
hsa-miR-589-5p	5.41959	2.87902	2.76377	3.48895	0.287757	2.24416	0.164279	0.737839	0.999527
hsa-let-7d-3p	2.40871	2.87902	2.30314	1.49527	0.320349	1.74297	0.146149	0.739505	0.999527
hsa-miR-324-3p	18.0653	21.5926	16.5826	14.4542	0.21462	4.21919	0.435745	0.740576	0.999527
hsa-miR-421	21.0762	17.9938	19.3464	11.4637	0.208127	4.20984	0.351942	0.748295	0.999527
hsa-miR-200c-3p	21.0762	23.0321	21.6495	24.4227	-0.199012	4.56941	0.446439	0.749166	0.999527
hsa-miR-624-5p	7.22613	5.03828	7.83067	5.48264	-0.243737	2.92732	0.197112	0.752471	0.999527
hsa-miR-6513-3p	0.602177	1.43951	1.38188	0.996844	-0.376981	1.15477	0.0996768	0.756609	0.999527
hsa-miR-4504	0.602177	2.87902	2.30314	1.49527	-0.310428	1.54825	0.0990806	0.761116	0.999527
hsa-miR-573	28.9045	27.3506	20.7282	24.4227	0.181842	4.71789	0.39481	0.766115	0.999527
hsa-miR-345-3p	3.01089	1.43951	1.84251	1.49527	0.293153	1.61441	0.106124	0.767641	0.999527
hsa-miR-3140-5p	1.20435	2.15926	1.38188	0.996844	0.319359	1.32846	0.0921825	0.768323	0.999527
hsa-miR-212-3p	0.602177	1.43951	1.84251	0.498422	-0.368009	1.15332	0.0891403	0.769408	0.999527
hsa-miR-296-3p	13.8501	15.8346	13.8188	16.9463	-0.188224	4.02437	0.298273	0.77725	0.999527
hsa-miR-425-3p	115.016	126.677	108.708	96.6939	0.0983247	6.81381	0.318734	0.784033	0.999527
hsa-let-7b-5p	3.61306	3.59877	5.0669	0	0.345145	2.05947	0.0804583	0.785494	0.999527
hsa-miR-328-3p	0	2.15926	0.460628	1.99369	-0.375576	1.15997	0.0756562	0.787117	0.999527
novel_27	9.03266	12.2358	6.90941	9.96844	0.192199	3.39535	0.185538	0.7889	0.999527
hsa-miR-1277-3p	24.0871	20.1531	13.3582	31.899	-0.165577	4.55863	0.162644	0.790435	0.999527
hsa-miR-491-5p	1.80653	1.43951	0.460628	1.99369	0.284597	1.32903	0.0680517	0.797776	0.999527
hsa-miR-501-5p	1.20435	1.43951	0.921255	0.996844	0.302583	1.15767	0.067993	0.797861	0.999527
hsa-miR-200a-3p	24.6893	30.9494	23.9526	21.4321	0.155166	4.7109	0.281972	0.799809	0.999527
hsa-miR-9-3p	3.61306	2.15926	6.90941	0	-0.385465	2.14006	0.0711978	0.800708	0.999527
hsa-miR-1291	0	2.87902	1.38188	0.498422	0.348076	1.16082	0.0654968	0.801571	0.999527
hsa-miR-378i	0.602177	2.15926	0.460628	1.49527	0.310797	1.16143	0.0638934	0.803908	0.999527
hsa-miR-182-3p	0.602177	2.15926	1.84251	0	0.33973	1.15707	0.0635394	0.804491	0.999527
hsa-miR-942-5p	44.5611	50.3828	40.9959	37.8801	0.130524	5.471	0.303132	0.80808	0.999527
hsa-miR-4420	1.20435	1.43951	0.921255	1.99369	-0.25954	1.32619	0.058863	0.812421	0.999527
novel_8	0	10.7963	8.2913	4.4858	-0.431085	2.80117	0.0666085	0.813173	0.999527
hsa-miR-6516-3p	4.21524	0.719754	0.460628	3.48895	0.248494	1.7418	0.0558751	0.81739	0.999527
novel_51	0	46.784	0	23.9243	0.806374	4.15619	0.0664299	0.818788	0.999527
hsa-miR-33a-5p	642.523	598.115	447.73	646.453	0.0452647	9.19	0.0619625	0.818939	0.999527
hsa-miR-34c-5p	1.20435	2.87902	3.22439	0.996844	-0.221073	1.67687	0.0564786	0.822064	0.999527
hsa-let-7d-5p	53.5938	68.3766	70.0154	49.3438	-0.106215	5.94148	0.20528	0.822412	0.999527
hsa-miR-27a-5p	33.1197	40.3062	35.0077	25.9179	0.131547	5.10915	0.224086	0.822701	0.999527
novel_26	49.9807	0	27.177	0	0.762364	4.35539	0.0625471	0.824003	0.999527
hsa-miR-19a-5p	4.21524	10.7963	5.98816	5.98106	0.169703	2.9482	0.0862027	0.825509	0.999527
hsa-miR-4518	6.02177	6.47778	4.60628	5.48264	0.170945	2.74518	0.0895529	0.828693	0.999527
hsa-miR-874-5p	0.602177	3.59877	2.76377	1.49527	-0.212418	1.68038	0.0497164	0.828787	0.999527
hsa-miR-1255a	4.21524	2.15926	2.76377	3.98738	-0.189625	2.1522	0.0649838	0.829753	0.999527
hsa-miR-767-3p	3.61306	4.31852	3.68502	4.4858	-0.178972	2.36473	0.0740168	0.832167	0.999527
novel_11	4.21524	0	5.52753	0	-0.458515	1.89231	0.0515564	0.833146	0.999527
hsa-miR-550a-5p	1.20435	1.43951	0	1.99369	0.283221	1.16058	0.0459531	0.833218	0.999527
hsa-miR-340-3p	10.8392	18.7136	11.0551	18.4416	-0.140436	3.984	0.126655	0.83356	0.999527
hsa-miR-30e-3p	333.004	297.978	264.4	290.58	0.0503568	8.21497	0.135716	0.835938	0.999527
hsa-miR-126-5p	24.6893	25.9111	21.1889	20.9337	0.128028	4.59552	0.190882	0.836318	0.999527
novel_30	95.7462	79.1729	75.0823	75.2617	0.0846503	6.36229	0.187215	0.838886	0.999527
hsa-miR-1284	1.20435	0.719754	1.38188	0	0.302367	0.961168	0.0426638	0.839163	0.999527
hsa-miR-5001-3p	1.20435	0.719754	1.38188	0	0.302367	0.961168	0.0426638	0.839163	0.999527
hsa-miR-4517	4.21524	7.19754	3.22439	5.98106	0.163039	2.62493	0.0670698	0.839595	0.999527
hsa-miR-4999-5p	3.61306	2.87902	3.22439	1.99369	0.178219	2.01281	0.0541606	0.843922	0.999527
hsa-miR-3611	5.41959	6.47778	5.52753	6.47949	-0.150509	2.82782	0.0729348	0.847553	0.999527
hsa-miR-181b-2-3p	4.81742	10.0766	7.83067	6.97791	-0.142399	3.08869	0.0725196	0.850113	0.999527
hsa-miR-196a-5p	2.40871	0	1.84251	0	0.286336	1.15018	0.0369698	0.851013	0.999527
hsa-miR-3179	2.40871	0	1.84251	0	0.286336	1.15018	0.0369698	0.851013	0.999527
hsa-miR-301a-5p	16.861	20.1531	16.122	20.4353	-0.119709	4.28637	0.135553	0.852413	0.999527
hsa-miR-548n	2.40871	0.719754	0.921255	2.49211	-0.194312	1.476	0.0356529	0.852789	0.999527
hsa-miR-331-3p	27.098	39.5865	33.1652	22.9274	0.109729	4.9824	0.132457	0.853591	0.999527
hsa-miR-597-5p	5.41959	1.43951	3.22439	2.49211	0.158194	2.10498	0.0399017	0.857909	0.999527
novel_50	33.7219	0	0	20.9337	0.584226	3.88634	0.0385806	0.860987	0.999527
hsa-miR-1180-3p	5.41959	1.43951	4.60628	2.49211	-0.149933	2.23298	0.0373757	0.86246	0.999527
novel_21	34.3241	32.3889	27.177	29.4069	0.1024	4.99247	0.143076	0.863094	0.999527
novel_12	4.81742	0	5.98816	0	-0.386711	1.99451	0.0343642	0.863923	0.999527
hsa-miR-33a-3p	52.3894	43.905	34.5471	47.8485	0.0906303	5.51359	0.128212	0.864574	0.999527
hsa-miR-877-5p	7.8283	14.3951	7.37004	14.4542	-0.118423	3.59164	0.0662654	0.865702	0.999527
hsa-miR-330-5p	13.2479	11.5161	13.8188	6.97791	0.116658	3.64304	0.0757025	0.866452	0.999527
novel_29	0	18.7136	12.8976	8.47317	-0.367908	3.46585	0.0345707	0.86786	0.999527
hsa-miR-128-1-5p	3.61306	2.15926	2.76377	1.99369	0.153304	1.90885	0.0369298	0.868697	0.999527
hsa-miR-20a-3p	289.045	292.22	273.613	241.735	0.0382029	8.10194	0.0796873	0.878531	0.999527
hsa-miR-767-5p	9.63483	13.6753	14.7401	7.97475	-0.10509	3.65886	0.0616882	0.87952	0.999527
hsa-miR-26a-2-3p	75.2721	80.6124	61.7241	73.7665	0.0656917	6.20465	0.106038	0.880657	0.999527
hsa-miR-1248	1.80653	1.43951	2.30314	0.996844	-0.153751	1.47408	0.0246425	0.882237	0.999527
hsa-miR-5699-3p	1.20435	2.15926	1.38188	1.99369	-0.152911	1.47907	0.0249541	0.882849	0.999527
hsa-miR-570-3p	8.43048	12.9556	14.2795	6.47949	-0.101771	3.54305	0.048277	0.885006	0.999527
hsa-miR-1246	1.20435	0	1.38188	0	-0.245417	0.851088	0.0212951	0.885968	0.999527
hsa-miR-190a-5p	14.4523	21.5926	15.2007	15.4511	0.0920226	4.14181	0.0720894	0.888247	0.999527
hsa-miR-132-3p	30.711	53.9815	42.3777	30.4037	0.0774239	5.3302	0.0651556	0.889452	0.999527
novel_45	10.237	0	0	7.47633	0.380746	2.47877	0.022656	0.892194	0.999527
hsa-miR-374a-5p	1205.56	1252.37	1129.92	1069.61	0.0245351	10.1843	0.0427839	0.893447	0.999527
hsa-miR-16-5p	254358	256780	251619	220493	-0.0205946	17.9058	0.0239223	0.895519	0.999527
novel_23	7.22613	7.91729	8.75192	5.98106	-0.0983122	3.10578	0.0385738	0.895775	0.999527
novel_6	20.474	17.2741	17.5038	14.9527	0.0844425	4.22023	0.0670649	0.896288	0.999527
hsa-miR-532-5p	189.084	159.785	168.59	158	-0.0385901	7.40939	0.0609251	0.896811	0.999527
hsa-miR-7706	1.80653	2.87902	1.38188	2.49211	0.125256	1.68357	0.0204457	0.898207	0.999527
hsa-miR-185-5p	553.401	514.624	510.836	479.482	-0.0258665	9.00959	0.0447788	0.899283	0.999527
hsa-miR-18a-3p	27.7001	35.9877	29.0195	25.9179	0.0745464	4.9366	0.070198	0.900694	0.999527
hsa-miR-141-3p	152.953	126.677	130.358	131.583	-0.0394147	7.09331	0.0553668	0.903892	0.999527
hsa-miR-3140-3p	0	1.43951	1.38188	0	-0.204005	0.855798	0.0148208	0.90476	0.999527
hsa-miR-651-5p	92.1331	112.282	94.4287	85.7286	0.044833	6.59968	0.0574333	0.907411	0.999527
novel_43	134.888	0	0	92.2081	0.429767	5.85664	0.0164953	0.908622	0.999527
hsa-miR-766-3p	3.01089	1.43951	2.30314	1.49527	0.110818	1.67655	0.01589	0.909634	0.999527
hsa-miR-873-5p	2.40871	2.15926	1.38188	2.49211	0.110501	1.6814	0.0162307	0.909922	0.999527
hsa-miR-548j-5p	13.8501	4.31852	8.2913	9.47002	-0.0801363	3.35429	0.0227604	0.911666	0.999527
hsa-miR-1307-3p	39.1415	43.1852	43.7596	34.3911	-0.0611176	5.36579	0.0594617	0.911835	0.999527
hsa-miR-33b-5p	23.4849	18.7136	13.3582	23.4258	0.0657135	4.3798	0.0355327	0.917622	0.999527
hsa-miR-342-3p	1654.78	1779.23	1798.29	1368.17	-0.018131	10.6875	0.0175	0.919208	0.999527
hsa-miR-215-5p	2.40871	1.43951	2.76377	0.498422	0.10011	1.54385	0.0100147	0.921624	0.999527
hsa-miR-93-5p	5158.25	5169.99	5272.34	4241.57	-0.0163624	12.275	0.0162968	0.92226	0.999527
hsa-miR-548a-3p	162.588	143.951	134.964	138.561	0.0299628	7.18937	0.0354291	0.92444	0.999527
hsa-miR-874-3p	12.6457	17.9938	17.0432	11.9621	-0.0621421	4.00012	0.0292954	0.925677	0.999527
hsa-miR-3613-3p	3.01089	1.43951	0.921255	2.99053	0.0882346	1.68056	0.0092912	0.927653	0.999527
novel_55	6.62395	0	0	5.48264	0.216038	2.06282	0.00962193	0.928098	0.999527
hsa-miR-105-3p	1.20435	2.87902	0.921255	2.99053	-0.0892963	1.62013	0.0087461	0.928645	0.999527
hsa-miR-629-3p	3.01089	6.47778	6.90941	1.99369	-0.0706303	2.51076	0.0098026	0.93123	0.999527
hsa-miR-548aw	2.40871	1.43951	1.84251	1.49527	0.0841899	1.54658	0.00835534	0.933605	0.999527
novel_52	6.02177	8.63705	0	11.9621	0.158315	2.92999	0.00692092	0.939795	0.999527
hsa-miR-362-5p	9.03266	7.19754	8.2913	5.98106	0.0531926	3.12961	0.0115475	0.943191	0.999527
hsa-miR-17-3p	322.165	351.24	351.92	268.151	-0.016735	8.34015	0.01305	0.94347	0.999527
hsa-miR-183-5p	107.79	104.364	104.562	92.2081	-0.0264232	6.69067	0.0218793	0.943664	0.999527
hsa-miR-203a-3p	1.20435	0.719754	1.38188	0.498422	-0.087877	1.06003	0.0047507	0.945968	0.999527
hsa-miR-30c-1-3p	9.03266	8.63705	9.67318	6.97791	-0.04945	3.2808	0.0115961	0.945984	0.999527
hsa-miR-3064-5p	6.02177	5.75803	3.68502	7.47633	-0.0520275	2.77353	0.00762666	0.947426	0.999527
hsa-miR-103a-2-5p	1.80653	1.43951	2.30314	0.498422	0.0645932	1.40072	0.00371942	0.952182	0.999527
novel_53	4.21524	0	0	4.4858	-0.122849	1.73962	0.00387349	0.953487	0.999527
hsa-miR-181a-5p	2594.78	3266.24	3251.57	2138.23	-0.0144888	11.4557	0.00371018	0.953967	0.999527
novel_37	10.237	13.6753	9.67318	11.4637	0.0374712	3.62101	0.00887281	0.957107	0.999527
novel_9	15.0544	0	8.75192	4.4858	0.0901227	3.06645	0.00249413	0.963828	0.999527
hsa-miR-580-3p	3.61306	2.87902	2.30314	3.48895	0.039943	2.06358	0.00284282	0.964307	0.999527
hsa-miR-30c-5p	5935.06	5539.94	4960.04	5534.98	-0.00693788	12.4225	0.00322178	0.966825	0.999527
hsa-miR-93-3p	18.6675	20.8729	22.1101	14.4542	-0.0242657	4.33155	0.00537018	0.969712	0.999527
hsa-miR-195-3p	2.40871	0.719754	1.84251	0.996844	0.0394862	1.39987	0.00146924	0.969934	0.999527
hsa-miR-135a-5p	3.61306	1.43951	1.84251	2.99053	-0.0341956	1.85418	0.0016172	0.971375	0.999527
hsa-miR-550a-3-5p	1.20435	2.15926	0	2.99053	0.0389855	1.40997	0.000984657	0.975513	0.999527
hsa-miR-15b-5p	1744.51	2140.55	1857.71	1688.16	-0.00472384	10.858	0.0013372	0.978753	0.999527
hsa-miR-766-5p	3.01089	5.03828	4.14565	2.99053	0.0200616	2.28657	0.000822307	0.981447	0.999527
hsa-miR-122-5p	27.7001	28.0704	23.9526	26.4164	0.011191	4.7869	0.00156856	0.985285	0.999527
hsa-miR-4445-5p	0.602177	2.15926	1.38188	0.996844	0.0217945	1.24527	0.000337797	0.985581	0.999527
hsa-miR-1287-5p	3.01089	2.15926	2.30314	2.49211	-0.0135015	1.85501	0.000275508	0.988679	0.999527
hsa-miR-149-5p	1.20435	3.59877	4.14565	0	0.0150076	1.7385	0.000119538	0.991569	0.999527
hsa-miR-324-5p	129.468	122.358	115.618	113.142	0.0036199	6.92061	0.000470142	0.991653	0.999527
hsa-miR-652-3p	12.6457	8.63705	10.5944	8.9716	-0.00723207	3.50752	0.000292431	0.991857	0.999527
hsa-miR-23b-5p	1.20435	3.59877	2.76377	1.49527	-0.00635843	1.74247	6.14274e-05	0.994267	0.999527
hsa-miR-129-5p	8.43048	2.87902	5.52753	4.98422	-0.00530183	2.73295	6.68623e-05	0.994809	0.999527
hsa-miR-548a-5p	1.20435	1.43951	0.921255	1.49527	-0.0051454	1.24443	2.09827e-05	0.996406	0.999527
hsa-miR-146b-3p	3.01089	4.31852	5.0669	1.49527	0.00338721	2.19727	1.64763e-05	0.997135	0.999527
hsa-miR-378g	1.20435	1.43951	1.38188	0.996844	0.00386554	1.24299	1.08997e-05	0.99741	0.999527
hsa-miR-3684	2.40871	2.87902	2.30314	2.49211	0.000436894	1.85713	2.38e-07	0.999669	0.999669

## Sheet: p<0.05
miRNA	Sh1_1	Sh1_2	Scr_1	Scr_2	logFC	logCPM	F	PValue	FDR
novel_1	0	0	64.0272	70.7759	-9.9885	5.22296	327.504	4.88258e-11	2.1402e-08
novel_2	0	0	56.1966	50.839	-9.65563	4.90815	269.827	1.76716e-10	2.78034e-08
novel_28	0	0	12.8976	8.47317	-7.33929	2.83188	44.1204	1.16758e-05	0.000572949
novel_39	0	0	4.60628	4.4858	-6.11772	1.8858	18.3424	0.000775134	0.0215214
hsa-miR-4742-3p	0	0	2.76377	1.49527	-5.0538	1.22843	7.60075	0.015549	0.249375
hsa-miR-199a-5p	0	0	1.84251	1.99369	-4.89975	1.14439	6.80635	0.0207508	0.2968
hsa-miR-100-5p	0	0.719754	5.52753	1.99369	-3.38431	1.77643	8.15911	0.0120987	0.216933
hsa-miR-2355-3p	0.602177	0	1.84251	3.48895	-2.90817	1.46546	5.40228	0.0347075	0.431104
hsa-miR-223-3p	304.099	321.01	638.43	698.289	-1.23273	8.96875	96.5091	6.86529e-08	6.48083e-06
hsa-miR-148a-3p	17941.3	16211.7	28567.2	30681.9	-0.930246	14.5313	53.9341	2.56941e-06	0.000173251
hsa-miR-301a-3p	231.236	223.843	299.408	361.854	-0.674631	8.1462	22.2521	0.00670949	0.150804
hsa-let-7c-5p	933.977	979.585	1441.3	1263	-0.634487	10.1875	26.576	0.000564655	0.0177678
hsa-miR-29b-3p	18977.6	18445.1	23788.7	27823.9	-0.599961	14.455	21.7708	0.000312001	0.0105189
hsa-miR-7-5p	15135.1	14086.3	19196.2	19677.7	-0.547193	14.0668	20.3875	0.000655894	0.0193489
hsa-miR-18a-5p	1661.41	1681.34	1938.32	2394.42	-0.510692	10.9178	15.1844	0.00399667	0.0943215
hsa-miR-142-3p	198020	192846	227303	274643	-0.497167	17.7785	12.5833	0.00296334	0.0736157
hsa-miR-340-5p	523.292	482.235	682.65	607.576	-0.494188	9.17802	15.8226	0.0129202	0.217797
hsa-miR-590-3p	498	469.999	539.395	630.005	-0.408151	9.07354	10.0942	0.0437527	0.494312
hsa-miR-199b-5p	1375.97	1337.3	1655.04	1506.23	-0.355583	10.5281	8.78343	0.0486724	0.510519
hsa-miR-26b-5p	8432.89	8398.09	9740.43	9488.46	-0.327694	13.1444	7.88528	0.0445486	0.494312
hsa-miR-34a-5p	18918	18761.8	14082.8	13319.8	0.324072	13.9809	7.42962	0.0432887	0.494312
hsa-miR-339-5p	1898.06	2067.13	1599.3	1220.64	0.356463	10.7184	6.75614	0.0460799	0.494312
hsa-miR-107	1497.61	1691.42	1261.66	938.529	0.400013	10.3852	7.50773	0.0276299	0.362258
hsa-miR-30b-5p	2580.93	2411.18	1510.86	1835.19	0.441247	11.0148	11.4237	0.0124093	0.216933
hsa-miR-361-3p	817.154	771.576	573.481	474.996	0.464783	9.35439	13.299	0.0158501	0.249375
hsa-miR-378c	589.531	578.682	433.451	324.473	0.489248	8.901	11.9091	0.0193452	0.285341
hsa-miR-30d-5p	4604.85	4684.16	3152.07	2586.31	0.559844	11.8608	19.618	0.00104207	0.0273253
hsa-miR-194-5p	511.851	475.037	292.038	310.018	0.577766	8.62252	20.5726	0.00924728	0.18977
hsa-miR-339-3p	210.16	241.837	145.098	115.634	0.656929	7.46654	16.5267	0.0257446	0.347185
hsa-miR-140-3p	1303.71	1273.96	691.863	678.851	0.775656	9.92901	42.3622	3.27878e-05	0.00128965
novel_18	73.4656	91.4087	39.1533	32.3974	1.06547	5.8761	22.3154	0.0289015	0.36869
novel_20	79.4874	85.6507	40.5352	26.9148	1.15404	5.85187	23.1733	0.0189884	0.285341
hsa-miR-6724-5p	14.4523	23.0321	5.52753	3.98738	1.81945	3.59885	17.5532	0.01228	0.216933
hsa-miR-3688-3p	7.22613	2.87902	0.921255	1.49527	1.90199	2.02677	5.12494	0.0454513	0.494312
hsa-miR-183-3p	1.20435	2.15926	0	0	4.56478	0.867209	5.20918	0.0387935	0.469501
hsa-miR-1254	2.40871	1.43951	0	0	4.79429	0.972443	6.39525	0.0242267	0.336323
hsa-miR-6859-5p	2.40871	2.87902	0	0	5.21253	1.17104	9.19731	0.00903802	0.18977
hsa-miR-6511b-3p	1.20435	4.31852	0	0	5.24005	1.17568	8.47724	0.0114775	0.216933
novel_71	6.02177	11.5161	0	0	6.90847	2.29149	31.4839	6.66618e-05	0.00242034
novel_61	12.0435	9.3568	0	0	7.2105	2.5571	42.8359	1.36779e-05	0.000586907
novel_68	9.03266	13.6753	0	0	7.28385	2.60353	43.802	1.21388e-05	0.000572949
novel_72	13.2479	12.2358	0	0	7.45766	2.76266	51.5331	4.99746e-06	0.00029485
novel_66	20.474	16.5543	0	0	7.99571	3.24203	82.6841	3.24219e-07	2.55053e-05
novel_62	43.3568	34.5482	0	0	9.06513	4.24834	195.209	1.47672e-09	1.74253e-07
novel_65	65.6373	59.7396	0	0	9.74911	4.91423	298.404	9.06865e-11	2.1402e-08
