# Supplementary material
Source: HighWire-hosted journal article supplement (doi:10.1101/rna.079865.123)
Supplement: Supplemental_Table_S5-36.xlsx [file Supplemental_Table_S5-36.xlsx]

## Sheet: Sheet1
TARGETSCAN<-0.2	DIANA>80	miRDB score>80		36overlap genes
VGLL2	ACVR2B	IDS		FAIM
MOCS2	BSN	ADAM10		CASD1
FAIM	MARCKS	ACVR2B		GOPC
UBAP2L	FGF9	ZNF131		CBL
CASD1	SLC6A13	NFYA		VANGL2
ZNF131	GOPC	PCDH17		RBFOX2
CCDC179	FBXO33	BACE1		BCL2
GOPC	ZNF429	GPR158		LHFPL2
TTC1	PEAK1	TTYH3		SMIM13
ZNF146	ADAM10	FAIM		MARCKS
SLC10A4	TPRG1	STAG2		SGIP1
REEP5	ATXN7L3	NDST1		FBXO33
CBL	DENND11	SOBP		SOBP
VANGL2	FAIM	ETNK1		STAG2
RP11-650K20.3	IQCJ	GOPC		FGF9
RBFOX2	SLC5A3	CXCL8		PCDH8
CDK6	SLC5A3	CAND1		SDC4
BCL2	RRAS2	STK17B		ADAM10
ABHD2	PCDH8	PCDH8		SMARCA2
MEMO1	SMARCA2	SGIP1		AFF4
MYB	VANGL2	SMIM13		SPRED2
HPCAL1	SPRED2	SPRED2		CCNT2
LHFPL2	PIK3CA	CCDC173		KIAA0232
KCTD6	TTC21B	DENND6A		GPR158
MRFAP1	RICTOR	ANAPC1		PLEKHG3
SMIM13	ZNF280B	CBL		NDST1
MARCKS	TRIM33	DNM1		NFYA
DGKG	PLPP3	PLPP3		DENND6A
FBXL20	CNKSR3	UBAP2L		NOVA1
SGIP1	CBL	ZNF584		BAHD1
KDM5A	SGIP1	FGF9		ACVR2B
FBXO33	ZC3H6	PLEKHG3		CHL1
C3orf83	CPA6	TAB2		ITK
SOBP	TOP2B	USP49		BSN
TADA3	NFYA	TRAK1		ATXN7L3B
STAG2	AGL	CCNT2		SIRT1
ACER2	KLF5	OTULINL
CCDC85C	SSR3	SLAIN2
RNF7	ZEB1	YWHAG
SPPL3	B3GALNT	ANKHD1-EIF4EBP3
KCNK17	DNAJA1	HIPK3
FGF9	WDR54	IQCJ-SCHIP1
MAPK1	NR4A3	WDFY1
PCDH8	IL19	EIF4EBP3
SDC4	STAG2	PTGDR
LYG2	ITIH5	RBFOX2
MEIS2	ATP6V1G2-DDX39B	DNAJC24
MCTS1	KMT5B	PEAK1
GAB2	DZANK1	NONO
ADAM10	TNIK	FBXO33
PPAP2B	CHL1	ATXN7L3B
HMGN3	ZNF20	RRAS2
NR2F2	TIMM17A	SDC4
GPATCH2	TTC1	CASD1
PAK2	LUC7L3	LILRA2
SRGAP3	CCDC173	RAP2A
B3GALNT1	CCNT2	RICTOR
SMARCA2	SATB2	CCDC198
AFF4	LMX1A	CTNNA3
DTX4	EIF5A2	ZNF772
SCHIP1	XPOT	CHL1
MAP1LC3A	PRKCI	MVB12B
YWHAG	MEIS2	ADCY9
SPRED2	BRCA1	SLC1A4
CNEP1R1	SLC16A4	GPX8
DNAJC1	CCDC179	ZC3H6
CCNT2	ANAPC1	GPATCH2L
OTX2	ZBTB38	SMCR8
RASGEF1B	FBXL20	DCUN1D1
KIAA0232	RBFOX2	DTX4
CYTH3	ZNF584	PDE6B
IQCJ-SCHIP1	MUC19	ATF7IP
NNAT	WDR92	PMS1
GPR158	ZNF880	GIT1
MAFG	SMIM13	AP4M1
PLEKHG3	NCAN	FANCF
HOXB5	MARCHF6	CCNJ
SSR3	TYRO3	OLIG3
NDST1	KHDRBS2	SLC7A1
WDFY1	MAN2B2	AFF4
FCRLB	HBP1	CXCL11
CD274	TEAD1	USP6
UBXN10	MEMO1	SMARCA2
SLC30A3	DDX39B	ZC3H7B
AP2A2	CTNNA3	LHFPL2
RHOA	SYNC	TMEM254
RRAGC	AK4	BSN
TSTD2	SCAPER	RNF130
RP11-160N1.10	AHCYL2	UBQLN2
PVRL3	DPP4	CAPRIN1
HS6ST2	NAP1L2	SERINC5
EIF5A2	ATP6AP2	ITK
NUP188	PTCH1	SCHIP1
KLF4	SCAMP1	DOCK9
CISD1	HOMER1	BAHD1
SP3	GXYLT1	ITFG2
NFYA	DIP2C	SLC6A13
DDX52	NDST1	DDX39B
HGF	CSKMT	ARHGAP17
HS3ST5	TGIF2LY	ZNF20
OLA1	MMP16	CDC42EP3
ERLIN2	LINC01553	RASGEF1B
SNAP25	TRPS1	RAB8B
TAF1D	ZNF677	IREB2
RARB	RCCD1	SIRT1
AEN	PCGF5	NGRN
NCAN	MYB	ASIC1
SKIL	SAMD8	ATP6AP2
DENND6A	DCBLD1	NAALAD2
SIRPA	KIAA0232	TMEM159
FAM199X	SCAI	SNX25
LUZP1	TBX18	ZNF594
FXYD6	OLA1	HSDL2
PI4KB	SLC1A4	IFT57
KLF5	HDAC4	HPCAL1
SP4	LILRA2	HOXB5
KIAA1147	SIRT1	MARCKS
DAZAP2	KRTAP4-3	PPP1R3B
NOVA1	AFF4	KIAA0232
BAHD1	FARP2	UNC5C
ACVR2B	C21orf91	SIM1
FOXG1	CD274	ELOA
SLTM	nan	MRPL15
ACPL2	RMDN2	FDXACB1
PARP2	ARHGAP29	ACSS1
EGLN3	MAP3K20	CTCFL
DYNLL2	MMP24	TRIM33
BACE1	TULP4	VANGL2
ZNF777	DIP2A	NDC1
CHL1	KCTD6	PRMT2
AHRR	SLC38A9	NOVA1
ITK	ENTPD4	VPS13A
TNKS	VGLL2	KMT5B
DDX11	HMGCS1	RAB1A
CELF1	TGIF2LX	POU2F1
ATG4B	ZNF736	MBTPS2
TAB2	CACUL1	DNER
RP1-170O19.20	WIF1	MAP3K20
SMCR8	ZC3H4	HECA
GDPD5	RXYLT1	CCDC191
YWHAZ	HMGN3	IQCJ
KCNB1	CASD1	MARVELD3
BTG1	REEP5	ADGRE2
NCL	MAP1LC3C	PRDM10
BSN	ZNF226	FARP1
USP1	SOS1	CEP85
UBE2Q1	SRGAP3	USP31
ZBTB18	CREB1	EZH1
SLC6A9	HAUS3	PTCH1
BAK1	POU2F1	IMP4
HBP1	CDCA8	FMO2
KIAA1468	HGF	BCL2
ZC3H4	STK17B	FAM91A1
SPRY4	ZNF830	CEACAM6
MYLK4	XPR1
ZCCHC5	GRIK5
HOXA9	NNAT
ZNF24	SLC30A3
DCUN1D1	HOXA9
CACUL1	MSI2
FRRS1	ZNF667
ZBTB38	NONO
NOMO3	FKBP1A
MVB12B	ZC3H11A
NRG3	DGKG
ATXN7L3B	DCAF6
ATL2	PKIB
HMGXB4	CELF1
SRSF10	PLEKHG3
EPHA4	HNRNPA3
SLC35F1	ALDH16A1
GRHL2	SP3
SIRT1	ATXN7L2
E2F7	ULK4
AGO2	NR1D2
PAG1	EMR2
GPR12	SAMD12
POMGNT1	MAP10
ATXN7L3	TSTD2
RAP1B	VCPIP1
ZFPM2	nan
KHDRBS3	CDC42EP3
MPZL1	ZBTB18
CAPRIN1	C1orf220
SLC35B2	CFAP74
HLF	GNB4
TMEM178B	PRKAR2A
ADAM17	NBEAL1
CDC5L	ATXN7L3B
NKRF	UBE2C
HDC	nan
USP34	ZNF844
C2orf91	DCUN1D3
TRIM39	SNX27
RAB8B	PCDH11Y
RAB27B	SLC38A2
G6PC2	MED13
RAB2A	MAPK1
JAG1	WDPCP
	KCNK17
	ADAMTS6
	DGKD
	KCTD11
	TOP3A
	ARHGAP17
	RARB
	RNF152
	ZNF625-ZNF20
	LARGE1
	NR2F2
	PITPNM3
	B3GALNT1
	GOLT1B
	CISD1
	PKIA
	HLA-DQA1
	NEK9
	NOVA1
	HS6ST2
	AMDHD2
	ZNF652
	FAM98B
	TTC39C
	RPAIN
	WIPF1
	SOBP
	BAHD1
	CMPK2
	PLCL1
	CYTH3
	THSD7B
	PAWR
	THAP6
	RPS6KA3
	HECA
	ONECUT2
	DENND6A
	IFNAR1
	ZNF285
	RC3H1
	PAG1
	RNF115
	PATE4
	TRIM39
	RGS1
	PCDH17
	VAPA
	TXLNG
	SLC25A3
	WNT5A
	MOCS2
	STRAP
	DOCK2
	RNF44
	RBM25
	PHF6
	NECTIN3
	SKIL
	SEMA4D
	VKORC1L1
	NAALAD2
	ZC3H8
	FAXC
	SARAF
	KDM5D
	FAP
	ABHD2
	FANCA
	ZNF720
	MPP6
	MOBP
	CUX1
	PLXNC1
	SLCO4A1
	PABPC1L2A
	KCNV1
	ZNF141
	TLL2
	SMIM15
	TMEM65
	TEX15
	ITFG1
	SLC17A1
	NUP107
	PCDH11X
	KLHL9
	ZNF146
	RAB1A
	GAPT
	MAP1LC3A
	DAB2
	FOXG1
	FAM228A
	ACSM3
	nan
	GAB2
	AP4E1
	ZNF709
	SDC4
	ZNF354C
	ETNK1
	KPNA1
	TICAM2
	SAR1A
	MORC2
	TMEM178B
	SPPL3
	RAD18
	FGF12
	PNPLA4
	DDC
	BCL2
	COL6A5
	LRP2BP
	ZNF227
	GSTM3
	GPC3
	POLR3E
	CDK5RAP3
	UBR3
	DSTN
	CCDC198
	TDRP
	DLG1
	CEPT1
	ZNF768
	LARP1
	SAMD3
	PPP1CB
	NKRF
	PPP1R3B
	GEN1
	FBXO48
	NAP1L5
	PDE1C
	PDSS2
	NAPB
	PRMT5
	MARK3
	CES5A
	ZNF248
	UNC5C
	KCNE4
	NMRK1
	MTMR3
	NPFFR1
	DACH1
	TET3
	TMTC1
	TMOD2
	SPIRE1
	TGFA
	GABRB2
	ZNF182
	LPGAT1
	LHFPL2
	ITK
	SLTM
	UBN1
	MAP3K2
	UTRN
	RBM17
	RAB12
	STX12
	RCN1
	AVIL
	DDX60L
	KIF5A
	ELOA
	USP31
	UBXN10
	VARS
	PI4KB
	HEYL
	SAR1B
	KDM5A
	DPP8
	TTC39A
	CCN3
	IBTK
	RFX7
	nan
	SPICE1
	SKP2
	CCNJ
	QDPR
	CPEB1
	TASP1
	METTL14
	CCDC85C
	CEP350
	POSTN
	ATL3
	MCM6
	PELI1
	ZMAT3
	SLC8A1
	NSF
	ZKSCAN8
	MYLK4
	SH3RF2
	LCOR
	ROBO2
	MOB3B
	RBM33
	BDNF
	ZNF234
	HNF4G
	GOT1
	C9orf40
	NDC1
	TOMM5
	TTYH3
	DOCK3
	ZNF772
	CRY1
	TLR1
	ZMYM6
	KIAA1549L
	SLC7A6
	DTWD2
	GDI1
	SLC30A4
	OSTF1
	DELE1
	ANKMY2
	PGR
	ZNF829
	ASXL2
	OTULINL
	NEXMIF
	GSTM2
	IFT57
	SLITRK4
	ZNF430
	GPR158
	GABRQ
