# Supplementary material
Source: HighWire-hosted journal article supplement (doi:10.1101/rna.079865.123)
Supplement: Supplemental_TableS1.docx [file Supplemental_TableS1.docx]

| **HD and AML** | **FAB** | **Sex** | **Age** | **Cytogenetics** | **Molecular abnormalities** | **Analyzed**  **in** |
| --- | --- | --- | --- | --- | --- | --- |
| HD-1 | - | F | 43 | ND | ND | Fig 1D-E |
| HD-2 | - | M | 57 | ND | ND | Fig 1D-E |
| HD-3 | - | M | 59 | ND | ND | Fig 1D-E |
| HD-4 | - | M | 36 | ND | ND | Fig 1D-E |
| HD-5 | - | F | 71 | ND | ND | Fig 1D-E |
| HD-6 | - | M | 56 | ND | ND | Fig 1D-E |
| HD-7 | - | F | 28 | ND | ND | Fig 1D,5D |
| HD-8 | - | M | 33 | ND | ND | Fig 1D,5D |
| HD-9 | - | M | 53 | ND | ND | Fig 1D,5D |
| HD-10 | - | F | 24 | ND | ND | Fig 1D,5D |
| HD-11 | - | F | 53 | ND | ND | Fig 5D |
| HD-12 | - | F | 64 | ND | ND | Fig 5D |
| HD-13 | - | M | 57 | ND | ND | Fig S5C |
| HD-14 | - | M | 69 | ND | ND | Fig S5C |
| HD-15 | - | M | 34 | ND | ND | Fig S5C |
| HD-16 | - | F | 45 | ND | ND | Fig S5C |
| HD-17 | - | F | 67 | ND | ND | Fig S5C |
| HD-18 | - | F | 45 | ND | ND | Fig 1D (CD11b+) |
| HD-19 | - | F | 39 | ND | ND | Fig 1D  (CD11b+) |
| HD-20 | - | M | 44 | ND | ND | Fig 1D  (CD11b+) |
| HD-21 | - | M | 33 | ND | ND | Fig 1D  (CD11b+) |
| HD-22 | - | F | 70 | ND | ND | Fig 1D  (CD11b+) |
| HD-23 | - | F | 26 | ND | ND | Fig 1D  (CD11b+) |
| AML-1 | M6a | M | 67 | 46, XY, inv(3)(q21;q26)[20] | Mutations of EVI1 and JAK2 V617F | Fig 1D-E |
| AML-2 | M2a | F | 46 | 46, XX | FLT3-ITD mutation | Fig 1D-E |
| AML-3 | M2a | F | 57 | 46, XX | RUNX1 mutation | Fig 1D-E |
| AML-4 | M1 | F | 61 | 46, XX, t(9;22)(q34;q11), inv(3) | IDH1 mutation | Fig 1D-E |
| AML-5 | M4a | F | 73 | 46, XX[20] | DNMT3A and NRAS mutation | Fig 1D-E |
| AML-6 | M2b | M | 45 | 46, XY; t(8;21)(q22;q22) | AML1-ETO | Fig 1D-E |
| AML-7 | M1 | M | 62 | 46, XY | Mutations of PHF6 and CBL | Fig 1D, 5E |
| AML-8 | M2b | F | 66 | 46, XX | NRAS mutation | Fig 1D, 5E |
| AML-9 | M5a | M | 59 | 46, XY, t(8;21)(q22;q22) | AML1-ETO | Fig 1D, 5E |
| AML-10 | M2a | F | 67 | 46, XX[20] | NPM1 mutation | Fig 1D, 5E |
| AML-11 | M2b | F | 68 | 46, XX, t(8;21)(q22;q22) | AML1-ETO | Fig 1D, 5E |
| AML-12 | M2a | M | 72 | 46, XY, der(16);  t(1;16)(q21;q22) | JAK2 V617F mutation | Fig 1D, 5E |
| AML-13 | M1 | M | 32 | 46, XY | CEBPA mutation | Fig 1D, 5E |
| AML-14 | M2b | F | 49 | 47, XX, inv(16), +22[20] | CBFβ-MYH11 | Fig 1D, 5E |
| AML-15 | M1 | F | 54 | 46, XX | Mutations of IDH1 and NOTCH2 | Fig 1D, 5E |
| AML-16 | M2a | F | 62 | 46, XX[20] | Mutations of CEBPA and CYP3A4 | Fig 5D-5E |
| AML-17 | M4E0 | M | 70 | 46, XY, t(8; 21)(q22; q22) | AML1-ETO | Fig 2A-2C |
| AML-18 | M1 | F | 61 | 46, XX | Mutations of RUNX1 | Fig 2A-2C |
| AML-19 | M2a | M | 77 | 46, XY | Mutations of DNMT3A | Fig 2A-2C, 5E |
| AML-20 | M5a | F | 49 | 46, XX, t(8;21)(q22;q22) | AML1-ETO | Fig 5E |
| AML-21 | M2b | M | 62 | 46, XY[20] | Mutations of RUNX1 and SF3B1 | Fig 5D-5E |
| AML-22 | M2a | M | 61 | 46, XY, inv(16)(p13;q22)[15] | CBFβ-MYH11 | Fig 5D-5E |
| AML-23 | M1 | F | 50 | 47, XX, +8 | FLT3-ITD mutation | Fig 5D-5E |
| AML-24 | M0 | F | 64 | 46, XX | ND | Fig 5D-5E |

Table S1. Characteristics of healthy donor (HD) and primary AML patients

ND: Not determined
