# Supplementary material
Source: HighWire-hosted journal article supplement (doi:10.1101/rna.079865.123)
Supplement: Supplemental_TableS2.xlsx [file Supplemental_TableS2.xlsx]

## Sheet: RPKM_of_ALL_Genes_with_Pvalue
Geneid	Chr	Start	End	Strand	Length	Sh1_1	Sh1_2	Scr_1	Scr_2	Sh1___Scr_PValue	Sh1___Scr_FDR	Sh1___Scr_logFC
MPEG1	11	59208510	59212951	-	4442	53.0254	52.2174	19.8056	19.8429	5.67477e-33	8.6177e-29	1.42635
CHI3L1	1;1;1;1;1;1;1;1;1;1;1;1;1;1;1;1;1;1;1;1;1	203178931;203178931;203178981;203179134;203179761;203179761;203179761;203179998;203180470;203181162;203181162;203181162;203181162;203182731;203182731;203182731;203183641;203184576;203185184;203186316;203186599	203179877;203179585;203179585;203179585;203180133;203179877;203179877;203180652;203180652;203181285;203181285;203181285;203182134;203182841;203182805;203182852;203183791;203184632;203185385;203186345;203186749	-;-;-;-;-;-;-;-;-;-;-;-;-;-;-;-;-;-;-;-;-	3408	87.0457	88.5889	191.997	202.12	5.92936e-32	4.50216e-28	-1.14807
LYZ	12;12;12;12;12;12;12;12;12	69348341;69348384;69348386;69350108;69350108;69350108;69352220;69353153;69353153	69348544;69348544;69348544;69350506;69350272;69350272;69352298;69353495;69354234	+;+;+;+;+;+;+;+;+	1764	397.561	399.302	234.391	239.283	1.66109e-26	8.40846e-23	0.768416
TXNIP	1;1;1;1;1;1;1;1;1;1;1;1;1;1;1;1;1;1;1;1	145992435;145993521;145993579;145993839;145994016;145994016;145994016;145994281;145994281;145994281;145994544;145994544;145994929;145994929;145995144;145995144;145995144;145995404;145995404;145996017	145993886;145994167;145993886;145993886;145994216;145994167;145994167;145995031;145994437;145994437;145994800;145994800;145995031;145995031;145995291;145995254;145995291;145995763;145995476;145996600	-;-;-;-;-;-;-;-;-;-;-;-;-;-;-;-;-;-;-;-	3625	31.2588	30.3119	13.3263	12.7346	2.67217e-26	1.01449e-22	1.25798
ALDH1A3	15;15;15;15;15;15;15;15;15;15;15;15;15;15;15;15;15;15;15;15;15;15;15;15;15;15;15;15;15;15;15;15;15;15;15;15;15;15;15;15;15;15;15	100877714;100879376;100879813;100879839;100879848;100879875;100885267;100885267;100885267;100885267;100885267;100887572;100887572;100887572;100887572;100887572;100892069;100892510;100892510;100892945;100892945;100892945;100893954;100893954;100895933;100895933;100895933;100898060;100898083;100898083;100900575;100900575;100900575;100905523;100905523;100905523;100907121;100907121;100907121;100908408…	100877865;100880006;100880006;100881508;100880006;100880006;100885371;100885371;100885371;100885371;100885371;100887712;100887712;100887712;100887712;100887712;100892239;100892639;100892639;100893006;100893006;100892987;100894082;100894082;100896046;100896014;100896046;100898185;100898185;100898185;100900759;100900759;100900759;100905687;100905687;100905687;100907278;100907230;100907278;100908482…	+;+;+;+;+;+;+;+;+;+;+;+;+;+;+;+;+;+;+;+;+;+;+;+;+;+;+;+;+;+;+;+;+;+;+;+;+;+;+;+;+;+;+	5772	14.9679	14.2168	5.50903	5.58702	1.00628e-25	3.05626e-22	1.41318
ITGA4	2;2;2;2;2;2;2;2;2;2;2;2;2;2;2;2;2;2;2;2;2;2;2;2;2;2;2;2;2;2;2;2;2;2;2;2;2;2;2;2;2;2;2;2;2;2;2;2;2;2;2;2;2;2;2;2;2;2;2;2;2;2;2;2;2;2;2;2;2;2;2;2;2;2;2;2;2;2;2;2;2;2;2;2	181457202;181457207;181457225;181457404;181457428;181457713;181458196;181458196;181458196;181458196;181458196;181458196;181458241;181474960;181474960;181474960;181474960;181474960;181474960;181475159;181475159;181475159;181475159;181475820;181478757;181478757;181478757;181478757;181480137;181480137;181480137;181481598;181481598;181481598;181482360;181482360;181482360;181482514;181482514;181482514…	181457851;181457851;181457851;181457851;181457851;181457851;181458317;181458317;181458317;181458317;181459391;181458317;181458317;181475066;181475290;181475066;181475066;181475066;181475066;181475288;181475288;181475288;181475288;181476218;181479716;181478824;181478824;181478824;181480266;181480266;181480266;181481683;181481683;181481683;181482422;181482422;181482422;181482651;181482651;181482651…	+;+;+;+;+;+;+;+;+;+;+;+;+;+;+;+;+;+;+;+;+;+;+;+;+;+;+;+;+;+;+;+;+;+;+;+;+;+;+;+;+;+;+;+;+;+;+;+;+;+;+;+;+;+;+;+;+;+;+;+;+;+;+;+;+;+;+;+;+;+;+;+;+;+;+;+;+;+;+;+;+;+;+;+	7901	37.8454	38.596	21.9777	22.4425	1.23732e-25	3.13167e-22	0.801105
S100A9	1;1;1	153357854;153358269;153360644	153357881;153358433;153361027	+;+;+	577	569.292	560.23	333.635	325.235	1.66246e-25	3.41315e-22	0.795562
MPO	17;17;17;17;17;17;17;17;17;17;17;17;17;17;17;17;17;17;17;17;17;17	58269856;58270729;58271655;58272748;58272815;58273414;58273414;58275542;58275571;58277769;58277827;58278837;58279008;58279297;58279297;58279523;58279839;58279876;58280284;58280366;58280605;58280605	58270863;58270805;58271892;58272918;58272918;58273492;58273669;58275702;58275702;58278119;58278145;58279214;58279214;58279399;58279426;58279646;58280014;58280014;58280459;58280459;58280687;58280935	-;-;-;-;-;-;-;-;-;-;-;-;-;-;-;-;-;-;-;-;-;-	3526	17.4868	19.1604	40.7037	39.0098	1.79805e-25	3.41315e-22	-1.10338
JAG1	20;20;20;20;20;20;20;20;20;20;20;20;20;20;20;20;20;20;20;20;20;20;20;20;20;20;20;20;20;20;20;20;20;20;20;20;20;20;20;20;20;20;20;20;20;20;20;20;20;20;20;20;20;20;20;20;20;20;20;20;20;20;20;20;20;20;20;20;20;20;20;20;20;20;20	10637684;10637759;10639472;10639870;10640783;10640783;10640783;10641113;10641113;10641460;10641460;10641783;10641783;10642488;10642488;10643778;10643778;10644357;10644357;10644443;10644863;10644863;10645143;10645143;10645143;10645356;10645356;10645356;10645372;10645722;10645971;10645971;10645971;10645971;10646939;10646939;10646939;10646939;10647048;10647960;10647960;10647960;10647960;10647981;106…	10639955;10637967;10639955;10639955;10641276;10640933;10640933;10641244;10641244;10641693;10641693;10641892;10641892;10642601;10642601;10643863;10643863;10644384;10644384;10644979;10644979;10644979;10645256;10645256;10645256;10645469;10645469;10645469;10645469;10646084;10646366;10646084;10646084;10646084;10647103;10647312;10647103;10647103;10647103;10648028;10648110;10648110;10648110;10648110;106…	-;-;-;-;-;-;-;-;-;-;-;-;-;-;-;-;-;-;-;-;-;-;-;-;-;-;-;-;-;-;-;-;-;-;-;-;-;-;-;-;-;-;-;-;-;-;-;-;-;-;-;-;-;-;-;-;-;-;-;-;-;-;-;-;-;-;-;-;-;-;-;-;-;-;-	8534	24.1474	24.6415	13.489	13.9584	6.08412e-25	1.02659e-21	0.847926
CTD-2154B17.4	5;5;5;5;5	10761065;10767624;10767624;10770150;10770191	10761144;10767775;10767775;10770294;10770280	+;+;+;+;+	377	11.3376	13.942	85.5449	72.9452	7.94256e-25	1.20616e-21	-2.62994
CENPF	1;1;1;1;1;1;1;1;1;1;1;1;1;1;1;1;1;1;1;1;1;1;1;1;1;1;1;1;1;1;1;1;1;1;1;1;1	214603195;214603195;214603484;214613714;214613714;214613714;214614832;214614832;214618573;214619129;214620655;214622079;214629046;214630534;214632480;214637866;214639921;214644557;214647967;214648485;214648675;214648675;214648675;214651710;214651710;214651710;214652828;214652828;214652828;214653485;214653485;214655148;214655241;214656933;214656933;214658850;214663591	214603321;214603321;214603648;214613893;214613916;214613916;214615028;214615190;214618694;214619220;214620946;214622281;214629171;214630662;214632602;214638001;214643324;214647400;214647979;214648498;214648827;214648827;214648827;214651886;214651886;214651886;214652989;214652989;214652989;214653493;214654419;214655403;214655403;214657410;214657409;214659028;214664588	+;+;+;+;+;+;+;+;+;+;+;+;+;+;+;+;+;+;+;+;+;+;+;+;+;+;+;+;+;+;+;+;+;+;+;+;+	11690	49.6017	49.6683	77.5677	79.0911	4.35591e-24	6.01353e-21	-0.640212
EGR2	10;10;10;10;10;10;10;10;10;10;10;10;10;10;10;10;10;10;10;10	62811996;62812000;62812003;62814220;62814433;62815861;62815861;62815861;62815861;62815861;62816070;62816253;62818541;62819106;62893507;62894457;62901595;62916961;62919101;62919818	62814468;62814468;62814468;62814468;62814468;62816069;62815969;62815969;62816355;62816069;62816315;62816366;62818647;62819167;62893550;62894537;62901720;62917057;62919210;62919900	-;-;-;-;-;-;-;-;-;-;-;-;-;-;-;-;-;-;-;-	3689	12.4986	13.155	3.70292	4.17972	6.24977e-24	7.90908e-21	1.72101
XAF1	17;17;17;17;17;17;17;17;17;17;17;17;17;17;17;17;17;17;17;17;17;17;17;17;17;17;17;17;17;17;17;17;17;17;17;17;17;17;17;17;17;17;17;17;17;17;17;17;17;17;17;17;17;17;17;17;17;17;17;17;17;17;17;17;17;17;17;17;17;17;17;17;17;17;17;17;17;17;17;17;17;17;17;17;17;17	6755447;6755448;6755451;6755565;6755838;6755840;6755991;6755991;6756042;6756046;6756046;6756048;6756053;6756055;6756062;6756067;6756067;6756077;6756079;6756079;6757397;6758089;6758089;6758089;6758089;6758089;6758089;6758089;6758089;6758089;6758089;6758089;6758089;6758089;6758089;6758089;6758089;6758089;6758089;6758470;6758862;6759256;6759256;6759256;6759662;6759662;6759662;6759662;6759662;6759662…	6755651;6756110;6755651;6755651;6756110;6756110;6756110;6756110;6756110;6756110;6756110;6756256;6756110;6756110;6756110;6756110;6756110;6756110;6756110;6756110;6757431;6758224;6758592;6758224;6758224;6758224;6758224;6758224;6758224;6758224;6758175;6758224;6758224;6758263;6758224;6758224;6758329;6758632;6758224;6758716;6758959;6759519;6759556;6759718;6759718;6759718;6759718;6759718;6759718;6759718…	+;+;+;+;+;+;+;+;+;+;+;+;+;+;+;+;+;+;+;+;+;+;+;+;+;+;+;+;+;+;+;+;+;+;+;+;+;+;+;+;+;+;+;+;+;+;+;+;+;+;+;+;+;+;+;+;+;+;+;+;+;+;+;+;+;+;+;+;+;+;+;+;+;+;+;+;+;+;+;+;+;+;+;+;+;+	6615	22.3058	23.5565	12.3285	12.5713	8.49102e-24	9.91882e-21	0.899078
RP11-1143G9.4	12;12	69353493;69353743	69353608;69354225	-;-	599	288.463	285.41	146.645	162.06	1.66151e-23	1.80226e-20	0.912969
GSN	9;9;9;9;9;9;9;9;9;9;9;9;9;9;9;9;9;9;9;9;9;9;9;9;9;9;9;9;9;9;9;9;9;9;9;9;9;9;9;9;9;9;9;9;9;9;9;9;9;9;9;9;9;9;9;9;9;9;9;9;9;9;9;9;9;9;9;9;9;9;9;9;9;9;9;9;9;9;9;9;9;9;9;9;9;9;9;9;9;9;9;9;9;9;9;9;9;9;9;9;9;9;9;9;9;9;9;9;9;9;9;9;9;9;9;9;9;9;9;9;9;9;9;9;9;9;9;9;9;9;9;9;9;9;9;9;9;9;9;9;9;9;9;9;9	121207794;121207800;121209296;121209296;121210236;121210236;121210784;121210784;121231165;121231165;121248276;121265154;121265154;121265661;121268060;121268060;121268163;121281470;121281470;121281470;121281472;121281511;121282439;121282439;121283319;121286123;121286123;121286592;121297766;121299793;121300056;121300056;121300056;121301963;121301963;121301963;121301963;121301963;121301963;121301963…	121207897;121207897;121209397;121209397;121210329;121210329;121210867;121210867;121231303;121231303;121248323;121265186;121265297;121265754;121268219;121268219;121268219;121281562;121281562;121281562;121281562;121281562;121282550;121282550;121283392;121286185;121286185;121286761;121297842;121300005;121300126;121300126;121300126;121302167;121302167;121302167;121302167;121302149;121302167;121302167…	+;+;+;+;+;+;+;+;+;+;+;+;+;+;+;+;+;+;+;+;+;+;+;+;+;+;+;+;+;+;+;+;+;+;+;+;+;+;+;+;+;+;+;+;+;+;+;+;+;+;+;+;+;+;+;+;+;+;+;+;+;+;+;+;+;+;+;+;+;+;+;+;+;+;+;+;+;+;+;+;+;+;+;+;+;+;+;+;+;+;+;+;+;+;+;+;+;+;+;+;+;+;+;+;+;+;+;+;+;+;+;+;+;+;+;+;+;+;+;+;+;+;+;+;+;+;+;+	11018	12.3561	11.9139	6.55614	6.02867	2.44941e-23	2.47978e-20	0.964985
PRAM1	19;19;19;19;19;19;19;19;19;19;19;19;19;19;19;19;19;19;19;19;19;19	8490056;8490056;8490085;8490338;8490338;8490476;8490476;8490476;8490594;8490594;8490594;8490887;8490887;8491100;8491100;8497764;8498223;8498376;8499196;8499547;8502565;8502565	8490226;8490372;8490226;8490372;8490372;8490509;8490509;8490509;8490756;8490756;8490875;8490995;8490995;8492023;8491157;8497840;8498289;8499780;8499474;8499780;8502634;8503112	-;-;-;-;-;-;-;-;-;-;-;-;-;-;-;-;-;-;-;-;-;-	3763	16.035	16.4966	31.8656	31.7059	3.0269e-23	2.87291e-20	-0.948571
SAMHD1	20;20;20;20;20;20;20;20;20;20;20;20;20;20;20;20;20;20;20	36890229;36897568;36897822;36898440;36904157;36904157;36905364;36905364;36911218;36912461;36916722;36916949;36919364;36927182;36930760;36935029;36941039;36946738;36951436	36893066;36897959;36897959;36898544;36904249;36904249;36905394;36905503;36911333;36912552;36916830;36917049;36919519;36927252;36930875;36935189;36941111;36946804;36951843	-;-;-;-;-;-;-;-;-;-;-;-;-;-;-;-;-;-;-	5038	53.5939	55.3398	33.722	34.627	4.40325e-23	3.93339e-20	0.690417
GNAI2	3;3;3;3;3;3;3;3;3;3;3;3;3;3;3;3;3;3;3;3;3;3;3;3;3;3;3;3;3;3;3;3;3;3;3;3;3;3;3;3;3;3;3;3;3;3;3;3;3;3;3;3;3;3;3;3;3;3;3;3;3;3;3;3;3;3;3;3;3;3;3;3;3;3;3;3;3;3;3;3;3;3;3;3;3;3;3	50226292;50226737;50229065;50230776;50230810;50235196;50235952;50236204;50238112;50246894;50251409;50251620;50252100;50252100;50252100;50252100;50252100;50252100;50252100;50252397;50252397;50252397;50252397;50252397;50252397;50252397;50252397;50253024;50253024;50253024;50253024;50253024;50253024;50253024;50253024;50253024;50253154;50256192;50256192;50256192;50256192;50256192;50256192;50256192;502…	50227193;50227193;50230998;50230998;50230998;50235290;50236453;50236453;50238416;50247075;50252538;50251743;50252142;50252142;50252142;50252142;50252142;50252142;50252142;50252538;50252538;50252538;50252538;50252538;50252538;50252538;50252538;50253184;50253184;50253184;50253184;50253184;50253184;50253184;50253184;50253184;50253184;50256691;50256320;50256320;50256320;50256320;50256320;50256320;502…	+;+;+;+;+;+;+;+;+;+;+;+;+;+;+;+;+;+;+;+;+;+;+;+;+;+;+;+;+;+;+;+;+;+;+;+;+;+;+;+;+;+;+;+;+;+;+;+;+;+;+;+;+;+;+;+;+;+;+;+;+;+;+;+;+;+;+;+;+;+;+;+;+;+;+;+;+;+;+;+;+;+;+;+;+;+;+	7650	20.4173	20.9085	33.3416	34.1784	5.1939e-23	4.38192e-20	-0.690278
AL513122.1	9;9;9;9;9;9;9;9;9;9;9;9;9;9;9;9;9	121282452;121301963;121302911;121310684;121312339;121313934;121317086;121318406;121318665;121321268;121324554;121326512;121327308;121328891;121329238;121331388;121332434	121282550;121302167;121303065;121310845;121312488;121314023;121317218;121318494;121318880;121321401;121324644;121326682;121327482;121329015;121329315;121331448;121332603	+;+;+;+;+;+;+;+;+;+;+;+;+;+;+;+;+	2304	55.4571	53.7485	29.5854	27.1159	5.84096e-23	4.43504e-20	0.963039
AL513122.2	9;9;9;9;9;9;9;9;9;9;9;9;9;9;9;9;9	121300103;121301963;121302911;121310684;121312339;121313934;121317086;121318406;121318665;121321268;121324554;121326512;121327308;121328891;121329238;121331388;121332434	121300126;121302167;121303065;121310845;121312488;121314023;121317218;121318494;121318880;121321401;121324644;121326682;121327482;121329015;121329315;121331448;121332603	+;+;+;+;+;+;+;+;+;+;+;+;+;+;+;+;+	2229	57.323	55.557	30.5808	28.0283	5.84096e-23	4.43504e-20	0.963039
RP11-609D21.3	17	6772831	6776116	-	3286	38.5658	40.6646	21.4322	21.7735	8.09007e-23	5.85028e-20	0.89272
FCER2	19;19;19;19;19;19;19;19;19;19;19;19;19;19;19;19;19;19;19;19;19;19;19;19;19;19;19;19;19;19;19;19;19;19;19;19;19;19;19;19;19;19;19;19;19;19;19;19;19;19;19;19;19;19;19;19;19;19;19;19;19;19;19;19;19;19;19;19;19	7688758;7688774;7688776;7688781;7688782;7688944;7690159;7690159;7690159;7690159;7690159;7690159;7690406;7690406;7690406;7690406;7690406;7690406;7690487;7696825;7696825;7696825;7696825;7696825;7696825;7696825;7697013;7697013;7697013;7697013;7697013;7697013;7697236;7697236;7697236;7697236;7697236;7697236;7697527;7697527;7697527;7697527;7697527;7697527;7697527;7698356;7698356;7698356;7698356;7698356…	7689430;7689430;7689430;7689430;7689430;7689430;7690265;7690265;7690265;7690265;7690265;7690265;7690557;7690557;7690557;7690557;7690557;7690557;7690557;7696914;7696914;7696914;7696914;7696914;7696914;7696914;7697298;7697075;7697075;7697075;7697075;7697075;7697298;7697298;7697298;7697298;7697298;7697298;7697589;7697589;7697589;7697589;7697589;7697589;7697589;7698409;7698409;7698854;7698409;7698409…	-;-;-;-;-;-;-;-;-;-;-;-;-;-;-;-;-;-;-;-;-;-;-;-;-;-;-;-;-;-;-;-;-;-;-;-;-;-;-;-;-;-;-;-;-;-;-;-;-;-;-;-;-;-;-;-;-;-;-;-;-;-;-;-;-;-;-;-;-	2451	43.8012	41.7805	21.1858	22.5935	2.69257e-22	1.85861e-19	0.985448
HMGN5	X;X;X;X;X;X;X;X;X;X;X;X;X;X;X;X;X;X;X;X;X;X;X;X;X;X;X;X;X;X;X;X;X;X;X;X;X;X;X;X;X;X;X;X	81113701;81114835;81114985;81115054;81115111;81115192;81116204;81116204;81116204;81116204;81116204;81116204;81116204;81118432;81118432;81118432;81118432;81118432;81118432;81118432;81118730;81118730;81118730;81118730;81118730;81118730;81119788;81119788;81119788;81119788;81119788;81121535;81121535;81121535;81121535;81121535;81121535;81121535;81195118;81195118;81197706;81201737;81201737;81201737	81115230;81115230;81115230;81115230;81115230;81115230;81116341;81116341;81116341;81116341;81116341;81116341;81116341;81118485;81118485;81118485;81118485;81118485;81118485;81118485;81118759;81118759;81118759;81118780;81118759;81118759;81119817;81119817;81119817;81119817;81119817;81121672;81121688;81121672;81121683;81121638;81121688;81121672;81195297;81195297;81197778;81201886;81201913;81201942	-;-;-;-;-;-;-;-;-;-;-;-;-;-;-;-;-;-;-;-;-;-;-;-;-;-;-;-;-;-;-;-;-;-;-;-;-;-;-;-;-;-;-;-	2416	31.7129	32.6146	60.9958	56.4265	4.65496e-22	3.07349e-19	-0.850527
FOS	14;14;14;14;14;14;14;14;14;14;14;14;14;14;14;14;14;14;14;14;14;14;14;14;14;14	75278774;75278826;75278828;75278828;75278828;75278977;75279237;75279643;75279670;75279877;75279877;75279877;75279877;75279906;75279978;75280193;75280560;75280560;75280560;75280560;75280570;75280783;75280783;75280783;75280783;75280783	75279123;75279123;75279128;75279123;75279123;75279123;75279531;75280128;75280128;75280128;75280374;75280128;75280128;75280128;75280128;75280667;75280789;75280667;75280607;75280667;75280667;75281587;75281684;75281157;75281636;75282230	+;+;+;+;+;+;+;+;+;+;+;+;+;+;+;+;+;+;+;+;+;+;+;+;+;+	3238	27.4538	28.4911	14.3742	14.8664	2.14439e-21	1.35686e-18	0.954062
CD209	19;19;19;19;19;19;19;19;19;19;19;19;19;19;19;19;19;19;19;19;19;19;19;19;19;19;19;19;19;19;19;19;19;19;19;19;19;19;19;19;19;19;19;19;19;19;19;19;19;19;19;19;19;19;19;19;19;19;19;19;19;19;19;19	7739994;7742511;7742647;7742850;7743039;7743039;7743039;7743039;7743039;7743039;7743175;7744107;7744107;7744107;7744107;7744107;7744107;7744107;7744107;7744107;7744107;7744941;7744941;7744941;7744941;7744941;7744941;7744941;7744941;7744941;7744941;7745518;7745518;7745518;7745518;7745518;7745518;7745656;7745794;7745794;7746001;7746048;7746460;7746460;7746460;7746460;7746460;7747306;7747306;7747306…	7743240;7743240;7743240;7743240;7743240;7743240;7743240;7743240;7743240;7743240;7743240;7744219;7744219;7744193;7744219;7744201;7744219;7744219;7744219;7744219;7744219;7745092;7745092;7745092;7745092;7745092;7745092;7745092;7745092;7745092;7745092;7746087;7746087;7746087;7746087;7746087;7746087;7746087;7746087;7746087;7746087;7746087;7746531;7746531;7746531;7746531;7746531;7747511;7747365;7747365…	-;-;-;-;-;-;-;-;-;-;-;-;-;-;-;-;-;-;-;-;-;-;-;-;-;-;-;-;-;-;-;-;-;-;-;-;-;-;-;-;-;-;-;-;-;-;-;-;-;-;-;-;-;-;-;-;-;-;-;-;-;-;-;-	4413	15.1054	16.6132	7.3388	7.60583	5.29751e-21	3.21792e-18	1.10361
LAIR1	19;19;19;19;19;19;19;19;19;19;19;19;19;19;19;19;19;19;19;19;19;19;19;19;19;19;19;19;19;19;19;19;19;19;19;19;19;19;19;19;19;19;19;19;19;19;19;19;19;19;19;19;19;19;19;19;19;19;19;19;19;19;19;19;19;19;19;19;19;19;19;19;19;19;19;19;19;19;19;19;19;19;19;19;19;19;19;19;19;19;19;19;19;19;19;19;19;19;19;19;19;19;19;19;19;19;19;19;19;19;19;19;19;19;19;19;19;19;19;19;19;19;19;19;19;19;19;19;19;19;19;19;19;…	54351384;54353624;54354675;54354675;54354675;54355201;54355258;54355267;54355267;54355346;54355954;54355954;54355954;54355954;54355954;54355954;54355954;54355954;54355954;54355954;54355980;54356230;54356230;54356230;54356230;54356230;54356230;54356230;54356230;54356230;54356230;54356230;54356237;54356286;54356356;54356356;54356356;54356356;54356356;54356356;54356356;54356356;54356356;54356356;543…	54355414;54355414;54355414;54355414;54355414;54355414;54355414;54355414;54355414;54355414;54356006;54356006;54356006;54356006;54356006;54356006;54356006;54356006;54356006;54356006;54356006;54356267;54356267;54356398;54356267;54356267;54356398;54356267;54356267;54356267;54356267;54356267;54356267;54356398;54356398;54356398;54356398;54356398;54356398;54356398;54356398;54356398;54356398;54356398;543…	-;-;-;-;-;-;-;-;-;-;-;-;-;-;-;-;-;-;-;-;-;-;-;-;-;-;-;-;-;-;-;-;-;-;-;-;-;-;-;-;-;-;-;-;-;-;-;-;-;-;-;-;-;-;-;-;-;-;-;-;-;-;-;-;-;-;-;-;-;-;-;-;-;-;-;-;-;-;-;-;-;-;-;-;-;-;-;-;-;-;-;-;-;-;-;-;-;-;-;-;-;-;-;-;-;-;-;-;-;-;-;-;-;-;-;-;-;-;-;-;-;-;-;-;-;-;-;-	8071	40.4285	39.9894	27.3376	27.1943	6.42961e-21	3.75539e-18	0.578388
FOSB	19;19;19;19;19;19;19;19;19;19;19;19;19;19;19;19;19;19;19;19;19;19;19;19;19;19;19;19;19;19;19;19;19;19;19;19;19;19;19;19;19;19	45467995;45467995;45467995;45467995;45467995;45467995;45467996;45468435;45469876;45469886;45469913;45470265;45470629;45470629;45470629;45470629;45470629;45470629;45470746;45470746;45471079;45471194;45471194;45471194;45471194;45471194;45471194;45471194;45472551;45472551;45472551;45472551;45472551;45472551;45472551;45472551;45472551;45472551;45472551;45472847;45472847;45472848	45468712;45468712;45468712;45468712;45468712;45468712;45468712;45468712;45470949;45472067;45470949;45470412;45470949;45470949;45472081;45470949;45470949;45470949;45470949;45470949;45471301;45471301;45471301;45471301;45471301;45471301;45471301;45471301;45472553;45473067;45472706;45475179;45472706;45475178;45475178;45475178;45475178;45472706;45475178;45474597;45473040;45473012	+;+;+;+;+;+;+;+;+;+;+;+;+;+;+;+;+;+;+;+;+;+;+;+;+;+;+;+;+;+;+;+;+;+;+;+;+;+;+;+;+;+	5553	7.24684	7.25409	2.64729	2.88675	6.80211e-21	3.82581e-18	1.40816
COL27A1	9;9;9;9;9;9;9;9;9;9;9;9;9;9;9;9;9;9;9;9;9;9;9;9;9;9;9;9;9;9;9;9;9;9;9;9;9;9;9;9;9;9;9;9;9;9;9;9;9;9;9;9;9;9;9;9;9;9;9;9;9;9;9;9;9;9;9;9;9;9;9;9;9;9;9;9;9;9;9;9;9;9;9;9;9;9;9;9;9;9;9;9;9;9;9;9;9;9;9;9;9;9;9;9;9;9;9;9;9;9;9;9;9;9;9;9;9;9;9;9;9;9;9;9;9;9;9;9;9;9;9;9;9;9;9;9;9;9;9;9;9;9;9;9	114155560;114162715;114167689;114167715;114168608;114178291;114178291;114178291;114183022;114183022;114183022;114194404;114195959;114195959;114195959;114205102;114205102;114205759;114205759;114206252;114206252;114206252;114209675;114209675;114209675;114210982;114210982;114210982;114217770;114219791;114219791;114222223;114222223;114231079;114231079;114231822;114231822;114235599;114235599;114236981…	114156012;114162785;114169463;114169463;114169463;114178344;114178344;114178344;114183075;114183075;114183075;114194457;114196012;114196012;114196012;114205146;114205146;114205812;114205812;114206296;114206296;114206296;114209728;114209728;114209728;114211026;114211026;114211026;114218579;114219844;114219844;114222267;114222267;114231132;114231132;114231858;114231866;114235652;114235652;114237034…	+;+;+;+;+;+;+;+;+;+;+;+;+;+;+;+;+;+;+;+;+;+;+;+;+;+;+;+;+;+;+;+;+;+;+;+;+;+;+;+;+;+;+;+;+;+;+;+;+;+;+;+;+;+;+;+;+;+;+;+;+;+;+;+;+;+;+;+;+;+;+;+;+;+;+;+;+;+;+;+;+;+;+;+;+;+;+;+;+;+;+;+;+;+;+;+;+;+;+;+;+;+;+;+;+;+;+;+;+;+;+;+;+;+;+;+;+;+;+;+;+;+;+;+;+;+;+;+	13988	13.3246	13.8513	20.7858	20.5102	8.85645e-21	4.80336e-18	-0.585812
TTC19	17;17;17;17;17;17;17;17;17;17;17;17;17;17;17;17;17;17;17;17;17;17;17;17;17;17;17;17;17;17;17;17;17;17;17;17;17;17;17;17;17;17;17;17;17;17;17;17;17;17;17;17;17	15999380;15999784;15999802;15999824;15999824;15999834;16000118;16000118;16000118;16000118;16000118;16001915;16001915;16001915;16001915;16001915;16002657;16002657;16002793;16002793;16002793;16003831;16003831;16003831;16003831;16003831;16004201;16004201;16004201;16004201;16006474;16006474;16006474;16023673;16024489;16024618;16025017;16025017;16025017;16025088;16025152;16026540;16026540;16026540;160…	16000032;16000032;16000032;16000032;16000245;16000032;16000245;16000460;16000382;16000382;16000245;16002025;16002025;16002025;16002025;16002025;16002831;16002831;16002831;16002831;16002831;16003853;16003887;16003887;16003887;16003887;16004262;16004262;16004251;16004262;16006568;16006568;16006568;16025171;16024582;16025171;16025171;16025171;16025171;16025171;16025171;16026702;16028786;16027080;160…	+;+;+;+;+;+;+;+;+;+;+;+;+;+;+;+;+;+;+;+;+;+;+;+;+;+;+;+;+;+;+;+;+;+;+;+;+;+;+;+;+;+;+;+;+;+;+;+;+;+;+;+;+	5966	4.65684	4.57976	10.4854	10.007	1.00892e-20	5.28324e-18	-1.13175
ZFP36	19;19;19;19;19;19;19;19	39406813;39406857;39406858;39407439;39407743;39407743;39407743;39407745	39406928;39407109;39406932;39407481;39409412;39408179;39408143;39409368	+;+;+;+;+;+;+;+	2010	157.338	163.572	106.239	110.74	1.43007e-20	7.23901e-18	0.58258
CALR	19;19;19;19;19;19;19;19;19;19;19;19;19;19;19;19;19;19;19;19;19;19;19;19;19;19;19;19;19;19;19;19	12938578;12938607;12938614;12938645;12939134;12939134;12939134;12939428;12939428;12939428;12940053;12940053;12940053;12940053;12940243;12940243;12940397;12940541;12940541;12940541;12940744;12940744;12940744;12943213;12943537;12943537;12943713;12943713;12943713;12943873;12943942;12944212	12939235;12938770;12938770;12938770;12939235;12939235;12939235;12939631;12939631;12939631;12940370;12940147;12940147;12940147;12940452;12940452;12940452;12940654;12940654;12940654;12940872;12940887;12940887;12943629;12943629;12943629;12943962;12943756;12944489;12943988;12944403;12944489	+;+;+;+;+;+;+;+;+;+;+;+;+;+;+;+;+;+;+;+;+;+;+;+;+;+;+;+;+;+;+;+	2714	531.995	529.865	749.045	746.066	1.69028e-20	8.28018e-18	-0.475671
SAPCD2	9;9;9;9;9;9	137062124;137064863;137065078;137065522;137066262;137069890	137064787;137064979;137065185;137065668;137066374;137070588	-;-;-;-;-;-	3848	2.74149	2.70833	8.25179	7.70862	2.38639e-20	1.13249e-17	-1.53224
EGR3	8;8;8;8;8;8;8;8;8;8;8	22687659;22690043;22690424;22690472;22691165;22692038;22692302;22692302;22692499;22692791;22692791	22691482;22691482;22691482;22691482;22691482;22692224;22692414;22692354;22692717;22693302;22693178	-;-;-;-;-;-;-;-;-;-;-	4855	8.98178	9.77162	3.77322	3.99892	2.67684e-20	1.23183e-17	1.28882
VIM	10;10;10;10;10;10;10;10;10;10;10;10;10;10;10;10;10;10;10;10;10;10;10;10;10;10;10;10;10;10;10;10;10;10;10;10;10;10;10;10;10;10;10;10;10;10;10;10;10;10;10	17228259;17228259;17228515;17228869;17229276;17229276;17229276;17229276;17229278;17229278;17229291;17230004;17230609;17230650;17230650;17230650;17230650;17230654;17233225;17233587;17233587;17233587;17233587;17233587;17233587;17233770;17233770;17233770;17233770;17233770;17233770;17233770;17234693;17234693;17234693;17234693;17234693;17234693;17235169;17235169;17235169;17235169;17235846;17235846;172…	17228524;17228524;17228676;17229027;17229870;17229750;17229950;17229985;17229985;17229985;17229985;17230710;17230710;17231093;17230710;17230710;17230710;17230710;17233682;17233682;17233682;17233682;17233682;17233682;17233682;17234124;17233931;17233931;17233931;17233931;17233931;17233931;17235034;17235085;17234818;17234818;17234818;17234818;17236379;17235389;17235389;17235389;17235889;17236379;172…	+;+;+;+;+;+;+;+;+;+;+;+;+;+;+;+;+;+;+;+;+;+;+;+;+;+;+;+;+;+;+;+;+;+;+;+;+;+;+;+;+;+;+;+;+;+;+;+;+;+;+	5158	48.6004	49.5721	33.8232	34.3318	1.24648e-19	5.4643e-17	0.544455
YBX3	12;12;12;12;12;12;12;12;12;12;12;12;12;12;12;12;12;12;12;12;12;12;12;12;12;12;12;12;12;12;12;12;12;12;12;12;12;12;12;12;12;12;12;12;12;12;12;12;12;12;12;12;12;12;12;12;12;12;12;12;12;12;12;12;12;12;12;12;12;12;12;12;12;12;12;12;12;12;12;12;12;12;12;12;12;12;12;12;12;12;12;12;12	10699089;10699213;10699227;10699317;10699427;10699478;10699610;10701253;10701254;10701254;10701254;10701254;10701254;10701254;10701254;10701254;10701274;10701275;10701960;10701960;10701960;10701960;10701960;10701960;10701960;10701960;10701960;10701960;10701960;10702010;10702259;10702412;10703523;10704023;10704051;10704051;10704051;10704051;10704051;10704051;10704051;10704060;10709908;10709908;107…	10699654;10699654;10699654;10699654;10699654;10699654;10699654;10701353;10701353;10701353;10701353;10701353;10701353;10701353;10701353;10701353;10701353;10701353;10702134;10702134;10702371;10702134;10702134;10702134;10702134;10702134;10704148;10702134;10702134;10702134;10702642;10702475;10703619;10704148;10704148;10704148;10704148;10704148;10704438;10704148;10704148;10704148;10710114;10710114;107…	-;-;-;-;-;-;-;-;-;-;-;-;-;-;-;-;-;-;-;-;-;-;-;-;-;-;-;-;-;-;-;-;-;-;-;-;-;-;-;-;-;-;-;-;-;-;-;-;-;-;-;-;-;-;-;-;-;-;-;-;-;-;-;-;-;-;-;-;-;-;-;-;-;-;-;-;-;-;-;-;-;-;-;-;-;-;-;-;-;-;-;-;-	8610	17.8028	17.9878	26.9186	26.4201	1.25939e-19	5.4643e-17	-0.557695
PLAU	10;10;10;10;10;10;10;10;10;10;10;10;10;10;10;10;10;10;10;10;10;10;10;10;10;10;10;10;10;10;10;10;10;10	73909177;73910605;73911104;73911147;73911157;73911525;73911525;73911525;73911525;73911525;73912041;73912041;73912215;73912215;73912215;73912215;73912924;73912924;73912924;73912924;73913290;73913290;73913290;73913539;73913539;73913539;73913980;73913980;73914776;73914776;73915251;73915251;73916389;73916389	73909294;73910749;73911218;73911218;73911218;73911612;73911612;73911539;73911925;73911612;73912068;73912068;73912322;73912322;73912322;73912322;73913098;73913098;73913049;73913098;73913381;73913381;73913381;73913758;73913753;73913758;73914128;73914128;73914916;73914916;73915399;73915399;73917497;73917496	+;+;+;+;+;+;+;+;+;+;+;+;+;+;+;+;+;+;+;+;+;+;+;+;+;+;+;+;+;+;+;+;+;+	2950	28.8547	28.5693	15.7315	16.3815	1.57187e-19	6.63066e-17	0.856661
PPP1R27	17;17;17;17;17;17;17	81833492;81833493;81833498;81833960;81834503;81834764;81834764	81833852;81833852;81834653;81834019;81834653;81835050;81835033	-;-;-;-;-;-;-	1449	112.908	107.416	70.6107	71.5032	2.00457e-19	8.18776e-17	0.650688
RNF220	1;1;1;1;1;1;1;1;1;1;1;1;1;1;1;1;1;1;1;1;1;1;1;1;1;1;1;1;1;1;1;1;1;1;1;1;1;1;1;1;1;1;1;1;1;1;1;1;1;1;1;1;1;1;1;1;1;1;1;1;1;1;1;1;1;1;1;1;1;1;1;1;1;1;1;1;1;1;1;1;1;1;1;1;1;1;1;1;1;1;1;1;1;1;1;1;1;1;1;1;1;1;1;1;1;1;1;1;1;1;1;1;1;1;1;1;1;1;1;1;1;1;1;1;1;1;1;1;1;1;1;1;1;1;1;1;1;1	44405194;44405288;44405288;44408702;44410584;44411981;44411981;44411981;44411981;44412698;44419304;44573002;44614165;44614165;44614173;44614265;44622742;44622742;44622742;44622742;44626297;44626297;44626297;44626297;44626326;44631732;44631732;44631968;44631975;44631984;44632235;44632255;44632343;44632343;44632343;44632343;44632343;44632343;44632343;44632343;44632343;44632645;44635545;44635545;446…	44405526;44405530;44405530;44408908;44410687;44412121;44412726;44412722;44412722;44412722;44419872;44573005;44614297;44614297;44614297;44614297;44622787;44622787;44622787;44622787;44627057;44626398;44626398;44626398;44626398;44632208;44632208;44632212;44632212;44632212;44632385;44632385;44632385;44632385;44632385;44632385;44632385;44632385;44632385;44632385;44632385;44632895;44635588;44635666;446…	+;+;+;+;+;+;+;+;+;+;+;+;+;+;+;+;+;+;+;+;+;+;+;+;+;+;+;+;+;+;+;+;+;+;+;+;+;+;+;+;+;+;+;+;+;+;+;+;+;+;+;+;+;+;+;+;+;+;+;+;+;+;+;+;+;+;+;+;+;+;+;+;+;+;+;+;+;+;+;+;+;+;+;+;+;+;+;+;+;+;+;+;+;+;+;+;+;+;+;+;+;+;+;+;+;+;+;+;+;+;+;+;+;+;+;+;+;+;+;+;+;+;+;+;+;+;+;+	9687	7.31326	7.95186	14.2275	13.0201	2.04883e-19	8.18776e-17	-0.818351
EGR1	5;5	138465490;138466757	138466068;138469315	+;+	3138	97.5638	101.28	70.457	69.7497	2.83896e-19	1.10545e-16	0.521905
HLA-E	6;6;6;6;6;6;6;6;6;6;6;6;6	30489467;30489510;30489512;30489726;30489726;30490240;30490240;30491137;30491137;30491537;30492404;30492541;30492749	30489595;30489595;30489995;30490365;30489995;30490515;30490515;30491283;30491412;30491653;30492436;30492583;30494205	+;+;+;+;+;+;+;+;+;+;+;+;+	2975	136.29	133.726	97.4427	94.7293	4.09074e-19	1.55305e-16	0.508607
CTD-2228K2.7	5;5;5;5;5;5;5;5;5;5;5;5;5;5;5;5;5;5;5;5;5;5;5	473236;475137;475284;476050;476232;477104;477244;477244;477245;477245;477806;477806;477806;477806;477806;478123;479782;479782;479782;479866;480362;480362;480362	473399;475319;475319;476490;476563;477336;477465;477336;477465;477336;478651;477849;477849;477849;477849;480884;480216;479950;480216;480216;480665;480508;480467	+;+;+;+;+;+;+;+;+;+;+;+;+;+;+;+;+;+;+;+;+;+;+	4302	14.7976	16.1255	28.3462	25.996	5.27749e-19	1.95473e-16	-0.795854
TNF	6;6;6;6	31575567;31576534;31576767;31577116	31575927;31576579;31576814;31578336	+;+;+;+	1676	141.486	141.504	100.774	99.2352	8.13489e-19	2.94135e-16	0.518584
PDZD7	10;10;10;10;10;10;10;10;10;10;10;10;10;10;10;10;10;10;10;10;10;10;10;10;10;10;10;10;10;10;10;10;10;10;10;10;10;10;10;10;10;10;10;10;10;10;10;10;10;10;10;10	101007683;101007684;101009250;101009250;101010272;101010272;101011690;101011690;101011925;101011925;101011958;101012167;101012167;101012167;101015636;101015636;101016377;101016377;101017332;101018099;101018099;101018099;101018099;101018822;101018822;101018822;101018822;101020618;101020618;101020618;101021798;101021798;101021798;101022209;101022209;101022615;101023128;101023436;101023436;101023436…	101008850;101008850;101009350;101009350;101010883;101010879;101011761;101011761;101012016;101012016;101012016;101012258;101012258;101012258;101015811;101015811;101016427;101016427;101017615;101018296;101018296;101018296;101018296;101018869;101019217;101019217;101019217;101020678;101020678;101020678;101021945;101021945;101022385;101022385;101022385;101024068;101023610;101023610;101023610;101024068…	-;-;-;-;-;-;-;-;-;-;-;-;-;-;-;-;-;-;-;-;-;-;-;-;-;-;-;-;-;-;-;-;-;-;-;-;-;-;-;-;-;-;-;-;-;-;-;-;-;-;-;-	5821	15.1309	15.615	9.02931	9.10948	8.78749e-19	3.10341e-16	0.779209
KDM1A	1;1;1;1;1;1;1;1;1;1;1;1;1;1;1;1;1;1;1;1;1;1;1;1;1;1;1;1;1;1;1;1;1;1;1;1;1;1;1;1;1;1;1;1;1;1;1;1;1;1;1;1;1;1;1	23019448;23019493;23030469;23030469;23044427;23050387;23050387;23050425;23053761;23053761;23053761;23055069;23055069;23055069;23055932;23055932;23057484;23057484;23059073;23059073;23066060;23068539;23068539;23069061;23069061;23071225;23071225;23072124;23072124;23072124;23073274;23073292;23073292;23077228;23077228;23077228;23077234;23078966;23078990;23078990;23078990;23079553;23079553;23079553;230…	23019947;23019947;23030634;23030634;23044486;23050520;23050520;23050520;23053839;23053839;23053839;23055418;23055161;23055161;23056038;23056038;23057565;23057565;23059167;23059167;23066071;23068681;23068681;23069151;23069151;23071359;23071359;23072197;23072197;23072197;23073403;23073403;23073403;23077360;23077360;23077360;23077360;23079177;23079177;23079177;23079177;23079667;23079595;23079667;230…	+;+;+;+;+;+;+;+;+;+;+;+;+;+;+;+;+;+;+;+;+;+;+;+;+;+;+;+;+;+;+;+;+;+;+;+;+;+;+;+;+;+;+;+;+;+;+;+;+;+;+;+;+;+;+	5435	15.553	16.749	25.3915	26.3545	9.23507e-19	3.18736e-16	-0.661816
GOLGA8M	15;15;15;15;15;15;15;15;15;15;15;15;15;15;15;15;15;15;15;15;15;15;15;15;15	28701954;28702214;28702465;28702645;28703319;28703842;28705159;28705483;28706116;28706399;28706613;28707748;28707953;28708126;28708375;28709267;28709267;28709529;28709529;28710487;28710487;28712276;28718434;28719740;28738334	28702129;28702369;28702562;28702745;28703410;28703917;28705227;28705739;28706203;28706506;28706699;28707857;28708037;28708173;28708413;28709347;28709347;28709588;28709588;28710606;28710606;28712323;28718589;28719835;28738384	-;-;-;-;-;-;-;-;-;-;-;-;-;-;-;-;-;-;-;-;-;-;-;-;-	2202	62.4037	67.5764	97.2427	96.8149	1.32523e-18	4.47221e-16	-0.560391
LST1	6;6;6;6;6;6;6;6;6;6;6;6;6;6;6;6;6;6;6;6;6;6;6;6;6;6;6;6;6;6;6;6;6;6;6;6;6;6;6;6;6;6;6;6;6;6;6;6;6;6;6;6;6;6;6;6;6;6;6;6;6;6;6;6;6;6;6;6;6	31586124;31586179;31586194;31586217;31586217;31586220;31586699;31586848;31586895;31587022;31587054;31587086;31587117;31587200;31587200;31587200;31587200;31587200;31587200;31587200;31587200;31587200;31587200;31587200;31587200;31587200;31587200;31587255;31587300;31587316;31587641;31587641;31587641;31587641;31587641;31587641;31587641;31587641;31587641;31587669;31587816;31587816;31587944;31587944;315…	31586315;31586315;31586315;31586315;31586315;31586315;31586807;31586939;31586939;31587318;31587318;31587106;31587318;31587318;31587318;31587318;31587318;31587318;31587318;31587318;31587318;31587318;31587318;31588909;31587318;31587318;31587318;31587318;31587318;31587318;31587733;31587733;31587733;31587733;31587733;31587733;31587730;31587733;31587733;31587733;31587966;31587841;31587966;31587966;315…	+;+;+;+;+;+;+;+;+;+;+;+;+;+;+;+;+;+;+;+;+;+;+;+;+;+;+;+;+;+;+;+;+;+;+;+;+;+;+;+;+;+;+;+;+;+;+;+;+;+;+;+;+;+;+;+;+;+;+;+;+;+;+;+;+;+;+;+;+	2281	234.75	230.69	172.401	165.264	1.39587e-18	4.60818e-16	0.480955
KDM5B	1;1;1;1;1;1;1;1;1;1;1;1;1;1;1;1;1;1;1;1;1;1;1;1;1;1;1;1;1;1;1;1;1;1;1;1;1;1;1;1;1;1;1;1;1;1;1;1;1;1;1;1;1;1;1;1;1;1;1;1;1;1;1;1;1;1;1;1;1;1;1;1;1;1;1;1;1;1;1;1;1;1;1;1;1;1;1;1;1;1;1;1;1;1;1;1;1;1;1;1;1;1;1;1;1;1;1;1;1;1;1	202724491;202727443;202729316;202729707;202729707;202729901;202729905;202730909;202730909;202730909;202730909;202730909;202731828;202731828;202731828;202731828;202731828;202733401;202733401;202733401;202733401;202735429;202735429;202735429;202735429;202736213;202736213;202736213;202736213;202740674;202740674;202740674;202741367;202741367;202741367;202742391;202742391;202742391;202742655;202742655…	202729173;202729173;202730027;202730027;202730027;202730027;202730027;202731063;202731063;202731063;202731063;202731063;202732141;202731939;202731939;202731939;202731939;202733886;202733886;202733886;202733886;202735587;202735587;202735587;202735587;202736392;202736236;202736392;202736392;202740812;202740812;202740812;202741722;202741722;202741722;202742505;202742505;202742505;202742805;202742805…	-;-;-;-;-;-;-;-;-;-;-;-;-;-;-;-;-;-;-;-;-;-;-;-;-;-;-;-;-;-;-;-;-;-;-;-;-;-;-;-;-;-;-;-;-;-;-;-;-;-;-;-;-;-;-;-;-;-;-;-;-;-;-;-;-;-;-;-;-;-;-;-;-;-;-;-;-;-;-;-;-;-;-;-;-;-;-;-;-;-;-;-;-;-;-;-;-;-;-;-;-;-;-;-;-;-;-;-;-;-;-	12092	0.92506	0.749447	2.28554	2.4181	1.46882e-18	4.74586e-16	-1.47119
TOMM40	19;19;19;19;19;19;19;19;19;19;19;19;19;19;19;19;19;19;19;19;19;19;19;19;19;19;19;19;19;19;19;19;19;19;19;19;19;19;19;19;19;19;19;19;19;19;19;19;19;19;19;19	44890569;44891220;44891220;44891231;44891236;44891237;44891407;44891407;44891407;44891407;44891410;44892393;44892393;44892393;44892393;44892393;44892837;44892837;44892837;44892837;44892837;44893780;44893780;44893780;44893780;44893780;44893829;44893961;44893961;44893961;44893961;44893961;44893961;44900730;44900730;44900730;44900730;44900730;44901028;44901028;44901028;44901028;44901028;44901208;449…	44890656;44891314;44891314;44891314;44891689;44891314;44891689;44891689;44891525;44891689;44891689;44892460;44892460;44892460;44892460;44892460;44892929;44892929;44892929;44892929;44892929;44893881;44893881;44893881;44893881;44893881;44893881;44894067;44894066;44894066;44894066;44894066;44894066;44900852;44900852;44900852;44900852;44900852;44901104;44901104;44901104;44901104;44901104;44901452;449…	+;+;+;+;+;+;+;+;+;+;+;+;+;+;+;+;+;+;+;+;+;+;+;+;+;+;+;+;+;+;+;+;+;+;+;+;+;+;+;+;+;+;+;+;+;+;+;+;+;+;+;+	3610	8.37621	8.87404	16.4514	17.7619	1.57244e-18	4.9748e-16	-0.969547
MAK16	8;8;8;8;8;8;8;8;8;8;8;8;8;8;8;8;8;8;8;8;8;8;8;8;8;8;8;8;8;8	33484750;33485182;33485182;33485200;33485207;33488378;33488378;33488378;33488378;33488378;33488520;33488520;33488520;33488520;33488520;33488734;33488734;33488734;33488988;33488988;33488988;33490285;33495542;33495542;33496625;33496625;33497232;33497232;33498432;33498432	33485221;33485221;33485221;33485221;33485631;33488427;33488427;33488427;33488427;33488427;33488629;33488602;33489012;33488629;33488629;33488798;33488798;33488798;33489139;33489291;33489139;33490339;33495616;33495616;33496741;33496741;33497297;33497297;33498646;33501260	+;+;+;+;+;+;+;+;+;+;+;+;+;+;+;+;+;+;+;+;+;+;+;+;+;+;+;+;+;+	4846	17.9312	18.2331	28.0577	28.2773	2.08908e-18	6.47443e-16	-0.621468
ACSL1	4;4;4;4;4;4;4;4;4;4;4;4;4;4;4;4;4;4;4;4;4;4;4;4;4;4;4;4;4;4;4;4;4;4;4;4;4;4;4;4;4;4;4;4;4;4;4;4;4;4;4;4;4;4;4;4;4;4;4;4;4;4;4;4;4;4;4;4;4;4;4;4;4;4;4;4;4;4;4;4;4;4;4;4;4;4;4;4;4;4;4;4;4;4;4;4;4;4;4;4;4;4;4;4;4;4;4;4;4;4;4;4;4;4;4;4;4;4;4;4;4;4;4;4;4;4;4;4;4;4;4;4;4;4;4;4;4;4;4;4;4;4;4;4;4;4;4;4;4;4;4;4;4;4;4;4;4;4;4;4;4;4;4;4;4;4;4;4;4;4;4;4;4;4;4;4;4;4;4;4;4;4;4;4;4;4;4;4;4;4;4;4;4;4;4;4	184755595;184755596;184755600;184755600;184755601;184755601;184756781;184756903;184757021;184757047;184757635;184757635;184757635;184757635;184757635;184757635;184757635;184757635;184757635;184757635;184757819;184757819;184757819;184757819;184757819;184757819;184757819;184757819;184757819;184757819;184760357;184760357;184760357;184760357;184760357;184760357;184760357;184760357;184760357;184762407…	184757265;184757265;184757265;184757265;184757265;184757265;184757265;184757265;184757265;184757265;184757706;184757706;184757706;184757706;184757706;184757706;184757706;184757706;184757706;184757706;184757920;184757920;184757920;184757920;184757920;184757920;184757920;184758876;184757920;184757920;184760500;184760500;184760500;184760500;184760500;184760500;184760500;184760500;184760500;184762523…	-;-;-;-;-;-;-;-;-;-;-;-;-;-;-;-;-;-;-;-;-;-;-;-;-;-;-;-;-;-;-;-;-;-;-;-;-;-;-;-;-;-;-;-;-;-;-;-;-;-;-;-;-;-;-;-;-;-;-;-;-;-;-;-;-;-;-;-;-;-;-;-;-;-;-;-;-;-;-;-;-;-;-;-;-;-;-;-;-;-;-;-;-;-;-;-;-;-;-;-;-;-;-;-;-;-;-;-;-;-;-;-;-;-;-;-;-;-;-;-;-;-;-;-;-;-;-;-	6284	19.32	19.1009	12.4165	12.3582	2.54395e-18	7.72649e-16	0.65095
SAMD9L	7;7;7;7;7;7;7;7;7;7;7;7;7;7;7;7;7;7;7;7;7;7;7;7;7;7;7;7;7;7;7;7;7;7;7;7;7	93130055;93130763;93131033;93131217;93135520;93135763;93135763;93135763;93135763;93144732;93144732;93144732;93144732;93144732;93144732;93145385;93145385;93145385;93145385;93145385;93145385;93145606;93145909;93145909;93145909;93146883;93146883;93147088;93147088;93148194;93148194;93148194;93148194;93148194;93148194;93148194;93148194	93135991;93135991;93135991;93131985;93135971;93135991;93135991;93135991;93135991;93144833;93144833;93144833;93144833;93144833;93144833;93146040;93145532;93145532;93145532;93145532;93146040;93146040;93146040;93146040;93146040;93147146;93147146;93147146;93147146;93148345;93148369;93148345;93148345;93148345;93148354;93148345;93148368	-;-;-;-;-;-;-;-;-;-;-;-;-;-;-;-;-;-;-;-;-;-;-;-;-;-;-;-;-;-;-;-;-;-;-;-;-	7135	5.02187	5.27735	2.39631	2.19398	3.35531e-18	9.99093e-16	1.18269
TPM4	19;19;19;19;19;19;19;19;19;19;19;19;19;19;19;19;19;19;19;19;19;19;19;19;19;19;19;19;19;19;19;19;19;19;19;19;19;19;19;19;19;19;19;19;19;19;19;19;19;19;19;19;19;19;19;19;19;19;19;19;19;19;19;19;19;19;19;19;19;19;19;19;19	16067021;16067507;16067534;16067700;16075686;16076047;16076047;16076047;16076047;16076100;16076306;16076499;16077021;16080056;16080826;16080915;16081441;16081723;16081913;16081913;16081913;16081913;16081913;16081913;16081913;16081920;16086423;16086423;16086423;16086423;16086423;16086423;16086423;16086423;16086423;16088027;16088027;16088027;16088027;16088027;16088027;16088027;16088027;16088059;160…	16067306;16067738;16067738;16067962;16075709;16076172;16076172;16076141;16076172;16076172;16076697;16076697;16077130;16080442;16081343;16081075;16081542;16082046;16082046;16082046;16082046;16082046;16082046;16082046;16082046;16082046;16086476;16086540;16086540;16086540;16086540;16086540;16086540;16086540;16086540;16088097;16088066;16088452;16088097;16088097;16088097;16088093;16088097;16088097;160…	+;+;+;+;+;+;+;+;+;+;+;+;+;+;+;+;+;+;+;+;+;+;+;+;+;+;+;+;+;+;+;+;+;+;+;+;+;+;+;+;+;+;+;+;+;+;+;+;+;+;+;+;+;+;+;+;+;+;+;+;+;+;+;+;+;+;+;+;+;+;+;+;+	7414	160.657	160.399	120.609	122.576	4.03331e-18	1.17788e-15	0.418759
CNTN4	3;3;3;3;3;3;3;3;3;3;3;3;3;3;3;3;3;3;3;3;3;3;3;3;3;3;3;3;3;3;3;3;3;3;3;3;3;3;3;3;3;3;3;3;3;3;3;3;3;3;3;3;3;3;3;3;3;3;3;3;3;3;3;3;3;3;3;3;3;3;3;3;3;3;3;3;3;3;3;3;3;3;3;3;3;3;3;3;3;3;3;3;3;3;3;3;3;3;3;3;3;3;3;3;3;3;3;3;3;3;3;3;3;3;3;3;3;3;3;3;3;3;3;3;3;3;3;3;3;3;3;3;3;3;3;3;3;3;3;3;3;3;3;3;3;3;3;3;3;3;3;3;3;3;3;3;3;3;3;3;3;3;3;3;3;3;3;3;3;3;3;3;3;3;3;3;3	2098813;2098866;2098888;2098926;2098928;2099274;2099274;2100558;2100558;2238829;2262346;2339178;2339178;2339178;2339178;2339178;2511350;2511589;2511670;2571341;2571416;2571416;2571416;2571416;2571416;2571416;2571416;2571416;2629526;2735873;2736215;2736215;2736215;2736215;2736215;2736215;2736215;2736215;2736215;2745522;2745522;2745522;2745522;2745522;2745522;2745522;2745522;2745522;2819486;2819486…	2098978;2098978;2098978;2098978;2098978;2099773;2099649;2100639;2100639;2239068;2262430;2339233;2339233;2339233;2339233;2339233;2511697;2511697;2511697;2571558;2571558;2571558;2571558;2571558;2571558;2571558;2571558;2571558;2629579;2736341;2736341;2736341;2736341;2736341;2736341;2736341;2736323;2736341;2736341;2745627;2745697;2745697;2745697;2745697;2745697;2745697;2745697;2745687;2819581;2819581…	+;+;+;+;+;+;+;+;+;+;+;+;+;+;+;+;+;+;+;+;+;+;+;+;+;+;+;+;+;+;+;+;+;+;+;+;+;+;+;+;+;+;+;+;+;+;+;+;+;+;+;+;+;+;+;+;+;+;+;+;+;+;+;+;+;+;+;+;+;+;+;+;+;+;+;+;+;+;+;+;+;+;+;+;+;+;+;+;+;+;+;+;+;+;+;+;+;+;+;+;+;+;+;+;+;+;+;+;+;+;+;+;+;+;+;+;+;+;+;+;+;+;+;+;+;+;+;+	9120	4.43241	4.33242	2.09793	1.97933	4.49895e-18	1.28908e-15	1.12138
EPSTI1	13;13;13;13;13;13;13;13;13;13;13;13;13;13;13;13;13;13;13;13;13;13;13;13;13;13;13;13;13;13;13;13;13;13;13;13;13;13;13;13;13;13;13;13;13;13;13;13;13;13;13;13;13;13;13;13;13;13;13;13;13;13;13;13;13;13;13;13;13;13;13;13;13;13;13;13;13;13;13;13;13;13;13;13	42886388;42886388;42886388;42888494;42889211;42895009;42895009;42895009;42895009;42895009;42900310;42900310;42900310;42900310;42900310;42917541;42917541;42917541;42917541;42917541;42919300;42919300;42919300;42919304;42926336;42926336;42926336;42926336;42926336;42926377;42926391;42953948;42953948;42953948;42953948;42953948;42953948;42953948;42953948;42963255;42963255;42963255;42963255;42963255;429…	42888502;42888502;42888502;42888502;42889242;42895108;42895108;42895108;42895108;42895108;42900383;42900383;42900383;42900383;42900383;42917624;42917624;42917624;42917624;42917624;42919332;42919332;42919332;42919332;42926429;42926429;42926429;42926429;42926429;42926429;42926429;42954021;42954021;42954021;42954021;42954021;42954021;42954021;42954021;42963338;42963338;42963338;42963338;42963338;429…	-;-;-;-;-;-;-;-;-;-;-;-;-;-;-;-;-;-;-;-;-;-;-;-;-;-;-;-;-;-;-;-;-;-;-;-;-;-;-;-;-;-;-;-;-;-;-;-;-;-;-;-;-;-;-;-;-;-;-;-;-;-;-;-;-;-;-;-;-;-;-;-;-;-;-;-;-;-;-;-;-;-;-;-	4924	1.86538	1.46315	0.146977	0.12411	6.62019e-18	1.86175e-15	3.62271
CLTB	5;5;5;5;5;5;5;5;5;5;5;5;5;5;5;5;5;5;5;5;5;5;5;5;5;5;5;5	176392455;176392455;176392642;176392649;176392793;176396479;176397607;176397607;176397607;176397930;176397930;176397930;176397944;176405590;176406157;176406157;176406167;176407553;176410257;176410257;176410257;176410257;176410257;176416177;176416177;176416177;176416177;176416177	176392945;176392945;176392932;176392945;176392935;176396532;176397718;176397718;176397718;176398047;176398047;176398047;176398047;176405822;176406340;176406708;176406708;176407591;176410303;176410303;176410303;176410303;176410303;176416538;176416539;176416261;176416569;176416569	-;-;-;-;-;-;-;-;-;-;-;-;-;-;-;-;-;-;-;-;-;-;-;-;-;-;-;-	2039	35.2126	35.067	59.8287	54.6634	7.11735e-18	1.96516e-15	-0.686431
MKI67	10;10;10;10;10;10;10;10;10;10;10;10;10;10;10;10;10;10;10;10;10;10;10;10;10;10;10;10;10;10;10;10;10;10;10;10;10;10	128096659;128096659;128101258;128101258;128101484;128102579;128102579;128102579;128110378;128110378;128111520;128111645;128111645;128111927;128111927;128111927;128112133;128112133;128112133;128113427;128113427;128114928;128115510;128116491;128116491;128116491;128119253;128119253;128119253;128122881;128122881;128123091;128123091;128125576;128125576;128126099;128126099;128126193	128099255;128099255;128101701;128101701;128101625;128103128;128109423;128109423;128110533;128110533;128111816;128111816;128111816;128112045;128112045;128112045;128112449;128112445;128112445;128113602;128113602;128116007;128116007;128116536;128116536;128116536;128119319;128119319;128119319;128122996;128122996;128123169;128123169;128125756;128125756;128126385;128126204;128126235	-;-;-;-;-;-;-;-;-;-;-;-;-;-;-;-;-;-;-;-;-;-;-;-;-;-;-;-;-;-;-;-;-;-;-;-;-;-	12807	97.4639	94.0904	129.18	129.23	8.3853e-18	2.27391e-15	-0.413817
IQGAP2	5;5;5;5;5;5;5;5;5;5;5;5;5;5;5;5;5;5;5;5;5;5;5;5;5;5;5;5;5;5;5;5;5;5;5;5;5;5;5;5;5;5;5;5;5;5;5;5;5;5;5;5;5;5;5;5;5;5;5;5;5;5;5;5;5;5;5;5;5;5;5;5;5;5;5;5;5;5;5;5;5;5;5;5;5;5;5;5;5;5;5;5;5;5;5;5;5;5;5;5;5;5;5;5;5;5;5;5;5;5;5;5;5;5;5;5;5;5;5;5;5;5;5;5;5;5;5;5;5;5;5;5;5;5;5;5;5;5;5;5;5;5;5;5;5;5;5;5;5;5;5;5;5;5;5;5;5;5;5;5;5;5;5;5;5;5;5;5;5;5;5;5;5;5;5;5;5;5;5;5;5;5;5;5;5;5;5;5;5;5;5;5;5;5;5;5;5;5;5;5…	76403249;76404424;76461570;76461570;76547409;76547409;76562396;76562396;76562396;76562396;76570580;76570580;76570580;76570580;76575693;76575693;76575693;76575693;76588906;76588906;76588906;76588906;76589615;76589615;76589615;76589615;76590408;76590408;76590408;76590408;76592838;76592838;76592838;76592838;76597074;76597439;76597439;76597439;76597439;76600812;76600812;76600812;76600812;76600812;766…	76403591;76404531;76461669;76461669;76547451;76547451;76562552;76562552;76562552;76562552;76570657;76570657;76570657;76570657;76575769;76575769;76575769;76575769;76588973;76588973;76588973;76588973;76589728;76589728;76589728;76589728;76590586;76590586;76590586;76590586;76592925;76592925;76592925;76592925;76597602;76597602;76597602;76597602;76597602;76600878;76600972;76600972;76600972;76600972;766…	+;+;+;+;+;+;+;+;+;+;+;+;+;+;+;+;+;+;+;+;+;+;+;+;+;+;+;+;+;+;+;+;+;+;+;+;+;+;+;+;+;+;+;+;+;+;+;+;+;+;+;+;+;+;+;+;+;+;+;+;+;+;+;+;+;+;+;+;+;+;+;+;+;+;+;+;+;+;+;+;+;+;+;+;+;+;+;+;+;+;+;+;+;+;+;+;+;+;+;+;+;+;+;+;+;+;+;+;+;+;+;+;+;+;+;+;+;+;+;+;+;+;+;+;+;+;+;+	7904	5.18335	5.37731	9.32224	9.35543	8.59728e-18	2.2905e-15	-0.804603
NCAM1	11;11;11;11;11;11;11;11;11;11;11;11;11;11;11;11;11;11;11;11;11;11;11;11;11;11;11;11;11;11;11;11;11;11;11;11;11;11;11;11;11;11;11;11;11;11;11;11;11;11;11;11;11;11;11;11;11;11;11;11;11;11;11;11;11;11;11;11;11;11;11;11;11;11;11;11;11;11;11;11;11;11;11;11;11;11;11;11;11;11;11;11;11;11;11;11;11;11;11;11;11;11;11;11;11;11;11;11;11;11;11;11;11;11;11;11;11;11;11;11;11;11;11;11;11;11;11;11;11;11;11;11;11;…	112961247;112961247;112961247;112961247;112961275;112961368;112961368;112961402;112961402;112961425;112961435;112961436;112961437;112961439;112961480;113003846;113003846;113003846;113003846;113040926;113130694;113132928;113133435;113133449;113202379;113202379;113202379;113202379;113202379;113202379;113202379;113202379;113202379;113202386;113202386;113202386;113202386;113204286;113204286;113204286…	112961660;112961660;112961660;112961660;112961664;112961664;112961664;112961664;112961664;112961664;112961664;112961664;112961664;112961664;112961664;113003856;113003856;113003856;113003856;113041216;113130799;113133448;113133448;113133951;113202453;113202453;113202453;113202453;113202453;113202453;113202453;113202453;113202453;113202453;113202453;113202453;113202453;113204504;113204504;113204504…	+;+;+;+;+;+;+;+;+;+;+;+;+;+;+;+;+;+;+;+;+;+;+;+;+;+;+;+;+;+;+;+;+;+;+;+;+;+;+;+;+;+;+;+;+;+;+;+;+;+;+;+;+;+;+;+;+;+;+;+;+;+;+;+;+;+;+;+;+;+;+;+;+;+;+;+;+;+;+;+;+;+;+;+;+;+;+;+;+;+;+;+;+;+;+;+;+;+;+;+;+;+;+;+;+;+;+;+;+;+;+;+;+;+;+;+;+;+;+;+;+;+;+;+;+;+;+;+	12737	10.5743	10.6297	7.2161	7.01612	1.03353e-17	2.70607e-15	0.592956
H1F0	22	37805093	37807436	+	2344	24.1709	22.5398	12.1185	12.3339	1.09972e-17	2.76132e-15	0.951853
KRT10	17;17;17;17;17;17;17;17;17;17	40818117;40818117;40818767;40818787;40819517;40820049;40820262;40820511;40821035;40821959	40818482;40818482;40818983;40819161;40819734;40820174;40820423;40820667;40821117;40822595	-;-;-;-;-;-;-;-;-;-	2144	0.911962	1.14124	6.32911	5.19644	1.10519e-17	2.76132e-15	-2.46916
TTLL12	22;22;22;22;22;22;22;22;22;22;22;22;22;22;22;22;22;22;22;22;22;22;22;22	43166622;43166623;43167603;43168774;43168774;43168774;43169500;43169500;43169500;43171628;43171819;43172403;43173715;43174209;43174293;43174499;43174499;43175271;43176320;43179619;43179841;43180742;43182980;43186893	43168159;43168159;43168159;43168912;43168912;43168912;43169568;43170274;43169568;43171750;43171900;43172554;43173826;43174403;43174403;43174615;43174615;43175678;43176396;43179752;43180000;43180940;43183149;43187133	-;-;-;-;-;-;-;-;-;-;-;-;-;-;-;-;-;-;-;-;-;-;-;-	4622	13.3205	14.4111	23.9372	22.101	1.10918e-17	2.76132e-15	-0.713742
FTH1	11;11;11;11;11;11;11;11;11;11;11;11;11;11;11;11;11;11;11;11;11;11;11;11;11;11;11;11;11;11;11;11;11;11;11;11;11;11;11;11;11;11	61959718;61959718;61959822;61964285;61964566;61964566;61964566;61964585;61964601;61964747;61964838;61964987;61964987;61964987;61964987;61964987;61964987;61964987;61964989;61965369;61965369;61965369;61965369;61965369;61965369;61965369;61965369;61965369;61966989;61967312;61967312;61967312;61967312;61967312;61967312;61967312;61967312;61967312;61967312;61967402;61967458;61967548	61959927;61959904;61959904;61964891;61964891;61964891;61964891;61964891;61964891;61965112;61964891;61965515;61965112;61965112;61965112;61965112;61965112;61965105;61965112;61965515;61965577;61965515;61965515;61965515;61965577;61965515;61965515;61965515;61967166;61967371;61967586;61967613;61967633;61967453;61967660;61967631;61967631;61967631;61967631;61967607;61967631;61967631	-;-;-;-;-;-;-;-;-;-;-;-;-;-;-;-;-;-;-;-;-;-;-;-;-;-;-;-;-;-;-;-;-;-;-;-;-;-;-;-;-;-	2030	161.097	163.68	120.7	118.935	1.36832e-17	3.35151e-15	0.456482
FLJ37453	1;1	15834474;15848108	15836906;15848147	-;-	2473	0.404512	0.549675	4.07875	3.51665	1.63112e-17	3.93177e-15	-2.96962
TEC	4;4;4;4;4;4;4;4;4;4;4;4;4;4;4;4;4;4;4;4;4;4;4;4;4;4;4;4;4;4;4;4;4;4;4;4;4;4;4;4;4;4;4;4;4;4;4;4;4	48135783;48136804;48137410;48138665;48138665;48138665;48138904;48138904;48138904;48138916;48141355;48141355;48141355;48141355;48141356;48145079;48145079;48145079;48145408;48145408;48145408;48145408;48146325;48146325;48146325;48146325;48149557;48149557;48149557;48150863;48150863;48150863;48155790;48156680;48156680;48163702;48167778;48167778;48168586;48168586;48170248;48170248;48171368;48171368;481…	48137499;48137499;48137499;48138822;48138822;48138822;48139022;48139022;48139022;48139022;48141683;48141419;48141419;48141419;48141419;48145295;48145295;48145295;48145579;48145579;48145579;48145579;48146401;48146399;48146399;48146399;48149685;48149690;48149690;48150942;48150942;48150942;48155866;48156734;48156734;48163767;48167953;48167953;48168626;48168626;48170376;48170376;48171408;48171449;481…	-;-;-;-;-;-;-;-;-;-;-;-;-;-;-;-;-;-;-;-;-;-;-;-;-;-;-;-;-;-;-;-;-;-;-;-;-;-;-;-;-;-;-;-;-;-;-;-;-	4030	10.1773	9.83812	4.55687	5.0042	1.72705e-17	4.09797e-15	1.08444
HLA-C	6;6;6;6;6;6;6;6;6;6;6;6;6;6;6;6;6;6;6;6;6;6;6;6;6;6;6;6;6;6;6;6;6;6;6;6;6;6;6;6;6;6;6;6;6;6	31268749;31268749;31268749;31268749;31268749;31268749;31269338;31269338;31269338;31269338;31269338;31269338;31269493;31269493;31269493;31269493;31269493;31269966;31269966;31269966;31269966;31270210;31270210;31270210;31270210;31270210;31270214;31270221;31270439;31271073;31271073;31271073;31271073;31271073;31271073;31271099;31271599;31271599;31271599;31271599;31271599;31271999;31271999;31271999;312…	31269173;31269173;31269173;31269173;31269173;31269173;31269385;31269385;31269385;31269385;31269666;31269385;31269525;31269543;31269525;31269525;31270085;31270085;31270085;31270085;31270085;31270485;31270485;31270485;31270485;31270422;31270331;31270485;31270485;31271348;31271348;31271331;31271348;31271348;31272050;31271868;31272130;31271868;31271868;31271868;31271868;31272090;31272069;31272105;312…	-;-;-;-;-;-;-;-;-;-;-;-;-;-;-;-;-;-;-;-;-;-;-;-;-;-;-;-;-;-;-;-;-;-;-;-;-;-;-;-;-;-;-;-;-;-	2507	181.394	182.837	138.258	132.983	2.19735e-17	5.02274e-15	0.443147
YWHAE	17;17;17;17;17;17;17;17;17;17;17;17;17;17;17;17;17;17;17;17;17;17;17;17;17;17;17;17;17;17;17;17;17;17;17;17;17;17;17;17;17;17;17;17	1344272;1344539;1344540;1344855;1345155;1345258;1345328;1347962;1354211;1354211;1354211;1354211;1354211;1361092;1361092;1361092;1361671;1361681;1361902;1361902;1361930;1364748;1364859;1364859;1364859;1364859;1364859;1364859;1364859;1369709;1369709;1398833;1398878;1399044;1399471;1400047;1400047;1400047;1400047;1400047;1400047;1400047;1400047;1400047	1345499;1345499;1345499;1345499;1345499;1345499;1345499;1348008;1354347;1354347;1354347;1354347;1354347;1361294;1361298;1361298;1362008;1362008;1362008;1362008;1362008;1365058;1365058;1365058;1365058;1365058;1365058;1365058;1365058;1369741;1369741;1400206;1399016;1399266;1399589;1400135;1400200;1400209;1400151;1400206;1400214;1400220;1400181;1400378	-;-;-;-;-;-;-;-;-;-;-;-;-;-;-;-;-;-;-;-;-;-;-;-;-;-;-;-;-;-;-;-;-;-;-;-;-;-;-;-;-;-;-;-	3847	83.5898	81.9778	114.544	113.325	2.21478e-17	5.02274e-15	-0.442771
RP11-66B24.4	15;15;15;15;15;15;15	100892859;100913203;100915657;100917888;100918804;100918804;100918804	100896066;100915980;100915980;100918213;100919283;100919238;100918841	-;-;-;-;-;-;-	6792	4.62608	4.72329	2.11109	2.16635	2.21601e-17	5.02274e-15	1.14599
NCF1B	7;7;7;7;7;7;7;7;7;7;7;7;7;7;7;7;7;7;7;7;7;7;7;7;7	73220624;73220639;73220646;73223878;73223878;73223879;73225711;73225711;73225879;73225886;73227409;73227409;73227410;73229567;73229567;73229581;73230143;73231810;73231811;73234591;73234614;73235169;73235189;73235662;73235669	73220717;73220717;73220720;73223956;73223956;73223956;73225785;73225786;73226052;73226051;73227464;73227464;73227478;73230025;73230260;73229691;73230268;73231929;73231890;73234719;73234718;73235339;73235334;73235787;73235945	+;+;+;+;+;+;+;+;+;+;+;+;+;+;+;+;+;+;+;+;+;+;+;+;+	1902	66.3654	64.3939	43.4246	43.7219	2.3408e-17	5.22756e-15	0.603427
RNF24	20;20;20;20;20;20;20;20;20;20;20;20;20;20;20;20;20;20;20;20;20;20;20;20;20	3927309;3931421;3931424;3933567;3934994;3934994;3934994;3934994;3945177;3945177;3945177;3945177;3948237;3948237;3948237;3948237;3963875;3963875;3963875;3963875;3974332;3974332;4015145;4015437;4015437	3934201;3934201;3934201;3934201;3935073;3935073;3935073;3935073;3945218;3945218;3945218;3945218;3948279;3948279;3948279;3948279;3964024;3964024;3964024;3964024;3974387;3974400;4015389;4015545;4015582	-;-;-;-;-;-;-;-;-;-;-;-;-;-;-;-;-;-;-;-;-;-;-;-;-	7668	11.7532	11.6943	7.17884	7.44863	2.46622e-17	5.42783e-15	0.698888
MMP2	16;16;16;16;16;16;16;16;16;16;16;16;16;16;16;16;16;16;16;16;16;16;16;16;16;16;16;16;16;16;16;16;16;16;16;16;16;16;16;16;16;16;16;16;16;16;16;16;16;16;16;16;16;16;16;16;16;16;16;16;16;16;16;16;16;16;16;16;16;16	55389700;55464552;55478830;55478971;55479998;55480533;55481557;55482909;55482909;55482909;55482909;55482909;55482909;55484016;55484016;55484016;55484016;55484016;55484016;55485299;55485299;55485299;55485299;55485299;55485299;55485604;55485604;55485604;55485604;55485604;55488543;55488543;55488543;55488543;55488662;55489651;55489651;55489651;55489651;55491801;55491801;55491801;55491801;55491801;554…	55390035;55464825;55478965;55479632;55480055;55480597;55481878;55483135;55483135;55483135;55483135;55483135;55483135;55484164;55484164;55484164;55484164;55484164;55484164;55485427;55485427;55485427;55485352;55485427;55485427;55485777;55485777;55485776;55485777;55485777;55488716;55488716;55488716;55488716;55488716;55489824;55489824;55489824;55489824;55491956;55491956;55491956;55491956;55491956;554…	+;+;+;+;+;+;+;+;+;+;+;+;+;+;+;+;+;+;+;+;+;+;+;+;+;+;+;+;+;+;+;+;+;+;+;+;+;+;+;+;+;+;+;+;+;+;+;+;+;+;+;+;+;+;+;+;+;+;+;+;+;+;+;+;+;+;+;+;+;+	4933	2.2952	2.28716	5.29984	6.11795	2.62246e-17	5.63782e-15	-1.2977
TMEM53	1;1;1;1;1;1;1;1;1;1;1;1;1;1;1;1;1;1;1;1;1;1;1;1;1;1;1	44635238;44635238;44635238;44636048;44645360;44645360;44645360;44653247;44653247;44653247;44654465;44654896;44654940;44660174;44660174;44660174;44660174;44660174;44674331;44674331;44674331;44674331;44674331;44674331;44674331;44674331;44674331	44636457;44636457;44636457;44636457;44645464;44645464;44645464;44655209;44655209;44655116;44655119;44655116;44655209;44660295;44660295;44660295;44660295;44660295;44674402;44674443;44674555;44674477;44674442;44674466;44674477;44674459;44674462	-;-;-;-;-;-;-;-;-;-;-;-;-;-;-;-;-;-;-;-;-;-;-;-;-;-;-	3635	9.1442	10.3213	20.0215	17.9501	2.63588e-17	5.63782e-15	-0.946579
CCDC117	22;22;22;22;22;22;22;22;22;22;22;22;22;22;22;22;22;22;22;22;22;22;22;22;22	28772674;28772674;28772674;28772704;28772728;28773241;28773725;28773725;28773725;28773725;28780948;28780948;28780948;28780948;28780948;28783508;28783508;28783508;28783508;28783508;28786089;28786089;28786089;28786089;28786089	28773034;28773034;28773034;28773223;28773034;28773386;28773778;28773778;28773778;28773778;28781172;28781103;28781172;28781172;28781172;28783645;28783645;28783645;28783645;28783645;28786093;28786177;28789301;28789295;28789301	+;+;+;+;+;+;+;+;+;+;+;+;+;+;+;+;+;+;+;+;+;+;+;+;+	4326	2.8485	3.07943	6.64992	7.22632	2.97781e-17	6.2807e-15	-1.20813
ACTG1	17;17;17;17;17;17;17;17;17;17;17;17;17;17;17;17;17;17;17;17;17;17;17;17;17;17;17;17;17;17;17;17;17;17;17;17;17;17;17;17;17;17;17;17;17;17;17;17;17;17;17;17;17;17;17;17;17;17;17;17;17;17;17;17;17;17;17;17;17;17;17;17;17;17;17;17;17;17;17;17;17	81509971;81509973;81509988;81509989;81509992;81509999;81510005;81510008;81510013;81510479;81510480;81510745;81510927;81510927;81510927;81510927;81510927;81510927;81510927;81510927;81510927;81510927;81511085;81511188;81511188;81511188;81511188;81511188;81511188;81511188;81511188;81511188;81511188;81511238;81511346;81511348;81511498;81511519;81511763;81511903;81511903;81511903;81511903;81511903;815…	81510833;81510329;81510833;81510833;81510833;81510833;81510833;81510833;81510329;81510833;81510833;81510833;81511108;81511108;81511108;81511108;81511626;81511108;81511108;81511108;81511108;81511108;81511108;81511626;81511803;81511626;81511626;81511626;81511848;81511626;81511626;81511626;81511626;81511626;81511626;81511626;81511626;81511578;81511803;81512142;81512142;81512115;81512142;81512142;815…	-;-;-;-;-;-;-;-;-;-;-;-;-;-;-;-;-;-;-;-;-;-;-;-;-;-;-;-;-;-;-;-;-;-;-;-;-;-;-;-;-;-;-;-;-;-;-;-;-;-;-;-;-;-;-;-;-;-;-;-;-;-;-;-;-;-;-;-;-;-;-;-;-;-;-;-;-;-;-;-;-	2976	834.228	820.739	645.484	644.859	3.65391e-17	7.55769e-15	0.377077
MYO1G	7;7;7;7;7;7;7;7;7;7;7;7;7;7;7;7;7;7;7;7;7;7;7;7;7;7;7;7;7;7;7;7;7;7;7;7;7;7;7;7;7;7;7;7;7;7;7;7;7;7;7;7;7;7;7;7;7;7;7;7;7;7;7;7;7;7;7;7;7;7;7;7;7;7;7;7;7;7;7;7;7;7;7;7;7;7;7;7;7;7;7;7;7;7;7;7;7;7;7;7;7;7;7;7;7;7;7;7;7;7;7;7;7;7;7;7;7;7;7	44962662;44962662;44962666;44962666;44962666;44962970;44962970;44962970;44962970;44962970;44964049;44964049;44964049;44964049;44964415;44964415;44964415;44964415;44964415;44964945;44964945;44964945;44964945;44964945;44965637;44965637;44965637;44965637;44965637;44966073;44966073;44966073;44966073;44966073;44966672;44966672;44966672;44967605;44967605;44967605;44967605;44967605;44967884;44967884;449…	44962895;44962895;44962895;44962895;44962895;44963124;44964162;44963124;44963124;44963124;44964162;44964162;44964162;44964162;44964519;44964519;44964519;44964519;44964519;44965089;44965089;44965089;44965089;44965089;44965860;44965860;44965860;44965860;44965860;44966280;44966838;44966280;44966838;44966280;44966838;44966838;44966838;44967737;44967737;44967737;44967737;44967737;44967958;44967958;449…	-;-;-;-;-;-;-;-;-;-;-;-;-;-;-;-;-;-;-;-;-;-;-;-;-;-;-;-;-;-;-;-;-;-;-;-;-;-;-;-;-;-;-;-;-;-;-;-;-;-;-;-;-;-;-;-;-;-;-;-;-;-;-;-;-;-;-;-;-;-;-;-;-;-;-;-;-;-;-;-;-;-;-;-;-;-;-;-;-;-;-;-;-;-;-;-;-;-;-;-;-;-;-;-;-;-;-;-;-;-;-;-;-;-;-;-;-;-;-	8653	51.0726	52.4385	38.4417	39.2295	3.68279e-17	7.55769e-15	0.432255
TNNT1	19;19;19;19;19;19;19;19;19;19;19;19;19;19;19;19;19;19;19;19;19;19;19;19;19;19;19;19;19;19;19;19;19;19;19;19;19;19;19;19;19;19;19;19;19;19;19;19;19;19;19;19;19;19;19;19;19;19;19;19;19;19;19;19;19;19;19;19;19;19;19;19;19;19;19;19;19;19;19;19;19;19;19;19;19;19;19;19;19;19;19;19;19;19;19;19;19;19;19;19;19;19;19;19;19;19;19;19;19;19;19;19;19;19;19;19;19;19;19;19;19;19;19;19;19;19;19;19;19;19;19;19;19;…	55132794;55132794;55132794;55132794;55132794;55132826;55132828;55132832;55132835;55132865;55132876;55132950;55133553;55133887;55133887;55133887;55133887;55133887;55133887;55133887;55133887;55133887;55133887;55133887;55133887;55134066;55134066;55134066;55134066;55134066;55134066;55134066;55134066;55134066;55134066;55134066;55134066;55137103;55137103;55137103;55137103;55137103;55137103;55137103;551…	55132960;55132960;55132960;55132960;55132960;55132960;55132960;55132960;55132960;55132960;55132960;55132960;55133674;55133927;55133927;55133927;55133927;55133927;55133927;55133927;55133927;55133927;55133927;55133927;55133927;55134156;55134156;55134156;55134156;55134156;55134156;55134156;55134204;55134156;55134156;55134156;55134156;55137212;55137177;55137212;55137212;55137212;55137212;55137212;551…	-;-;-;-;-;-;-;-;-;-;-;-;-;-;-;-;-;-;-;-;-;-;-;-;-;-;-;-;-;-;-;-;-;-;-;-;-;-;-;-;-;-;-;-;-;-;-;-;-;-;-;-;-;-;-;-;-;-;-;-;-;-;-;-;-;-;-;-;-;-;-;-;-;-;-;-;-;-;-;-;-;-;-;-;-;-;-;-;-;-;-;-;-;-;-;-;-;-;-;-;-;-;-;-;-;-;-;-;-;-;-;-;-;-;-;-;-;-;-;-;-;-;-;-;-;-;-;-	2171	55.3986	54.0984	36.4398	36.6156	4.05717e-17	8.21496e-15	0.601832
RRP1B	21;21;21;21;21;21;21;21;21;21;21;21;21;21;21;21;21;21;21;21;21	43659548;43669884;43672308;43673870;43674636;43675034;43676272;43676733;43683279;43684553;43685770;43686132;43686804;43687516;43687516;43690288;43690288;43691439;43691439;43693190;43693190	43659794;43669966;43672365;43673955;43674697;43675163;43676336;43676914;43683373;43684650;43685789;43686935;43686935;43688240;43688240;43690440;43690440;43691502;43691502;43696077;43696079	+;+;+;+;+;+;+;+;+;+;+;+;+;+;+;+;+;+;+;+;+	5762	12.4528	11.5363	18.9186	19.3437	4.21292e-17	8.41808e-15	-0.655338
FAM129A	1;1;1;1;1;1;1;1;1;1;1;1;1;1;1;1;1;1;1;1;1;1;1;1;1;1;1;1;1;1;1;1	184790724;184791030;184794118;184798079;184798079;184798079;184803585;184803585;184803585;184805946;184805946;184805946;184808074;184808074;184818638;184818638;184823167;184823167;184823638;184823650;184831847;184831847;184831847;184867864;184867864;184884633;184887739;184890108;184890108;184894075;184899179;184974302	184791065;184796097;184796097;184798190;184798190;184798190;184803692;184803692;184803692;184806056;184806056;184805985;184808235;184808235;184818825;184818825;184823329;184823329;184823742;184823742;184831962;184831962;184831962;184868558;184868041;184884800;184888181;184890185;184890222;184894206;184899309;184974550	-;-;-;-;-;-;-;-;-;-;-;-;-;-;-;-;-;-;-;-;-;-;-;-;-;-;-;-;-;-;-;-	8372	29.09	29.4265	21.5949	21.6741	4.72836e-17	9.32531e-15	0.453452
ZNF117	7;7;7;7;7;7;7;7;7;7;7;7;7;7	64971776;64974452;64976785;64978736;64979923;64981387;64981387;64981387;64981984;64981984;64981984;64981984;64989947;65006541	64979536;64979536;64977223;64979536;64981482;64981482;64981482;64981482;64982021;64982116;64982116;64982119;64991036;65006684	-;-;-;-;-;-;-;-;-;-;-;-;-;-	10691	14.2227	14.7281	9.7775	10.2892	4.91934e-17	9.57757e-15	0.546903
C12orf75	12;12;12;12;12;12;12;12;12;12;12;12;12;12;12;12;12;12;12;12;12;12;12;12;12;12;12;12;12;12;12;12;12;12;12;12;12;12;12	105235290;105326970;105330636;105330636;105330674;105330710;105330853;105330868;105348602;105348602;105348602;105348602;105348602;105348602;105353509;105365807;105365807;105365807;105365807;105365807;105366617;105366617;105366617;105366617;105366617;105366617;105367472;105367472;105367472;105367472;105367472;105367477;105370634;105370634;105370634;105370634;105370634;105370634;105395632	105235356;105327063;105330937;105330937;105330937;105330937;105330937;105330937;105348626;105348626;105348626;105348626;105348626;105348626;105353586;105365842;105365842;105366464;105365842;105365842;105366696;105366696;105366696;105366696;105366696;105366696;105367509;105367509;105367509;105367509;105367509;105367509;105371203;105370680;105370940;105371518;105371180;105371517;105396097	+;+;+;+;+;+;+;+;+;+;+;+;+;+;+;+;+;+;+;+;+;+;+;+;+;+;+;+;+;+;+;+;+;+;+;+;+;+;+	2693	1.09751	1.41336	4.83729	5.96997	5.11177e-17	9.82625e-15	-2.08432
HNRNPAB	5;5;5;5;5;5;5;5;5;5;5;5;5;5;5;5;5;5;5;5;5;5;5;5;5;5;5;5;5;5;5;5;5;5;5;5;5;5;5;5;5;5;5;5;5;5;5;5;5;5;5;5	178204507;178204533;178204539;178204541;178204544;178204548;178204571;178204815;178204815;178204815;178204815;178204815;178205568;178205842;178205842;178205842;178205842;178205842;178205842;178205842;178206732;178206732;178206732;178206732;178206732;178206732;178206732;178206732;178207094;178207094;178207094;178207094;178207094;178207094;178207094;178209330;178209330;178209330;178209330;178209330…	178204740;178204740;178204740;178204740;178204740;178205046;178205046;178205046;178205046;178205046;178205046;178205046;178206010;178206010;178206010;178206010;178206010;178206010;178206010;178206010;178206866;178206890;178206890;178206890;178206890;178206890;178206890;178206890;178207225;178207225;178207225;178207225;178207225;178207225;178207225;178209447;178209447;178209432;178209441;178209447…	+;+;+;+;+;+;+;+;+;+;+;+;+;+;+;+;+;+;+;+;+;+;+;+;+;+;+;+;+;+;+;+;+;+;+;+;+;+;+;+;+;+;+;+;+;+;+;+;+;+;+;+	2144	97.1557	103.938	139.072	141.707	5.35724e-17	1.01694e-14	-0.463718
MEF2C	5;5;5;5;5;5;5;5;5;5;5;5;5;5;5;5;5;5;5;5;5;5;5;5;5;5;5;5;5;5;5;5;5;5;5;5;5;5;5;5;5;5;5;5;5;5;5;5;5;5;5;5;5;5;5;5;5;5;5;5;5;5;5;5;5;5;5;5;5;5;5;5;5;5;5;5;5;5;5;5;5;5;5;5;5;5;5;5;5;5;5;5;5;5;5;5;5;5;5;5;5;5;5;5;5;5;5;5;5;5;5;5;5;5;5;5;5;5;5;5;5;5;5;5;5;5;5;5;5;5;5;5;5;5;5;5;5;5;5;5;5;5;5;5;5;5;5;5;5;5;5;5;5;5;5;5;5;5;5;5;5;5;5;5;5;5;5;5;5;5;5;5;5;5;5;5;5;5;5;5;5;5;5;5;5;5;5;5;5;5;5;5;5;5;5;5;5;5;5;5…	88717117;88718241;88718241;88718274;88718274;88720026;88720337;88720825;88720825;88720829;88720844;88720856;88721570;88721577;88721620;88721647;88721925;88722489;88722495;88722498;88722567;88722604;88722604;88722837;88728493;88728493;88728493;88728493;88728493;88728493;88728493;88728493;88728493;88728493;88728493;88728493;88728493;88728493;88728493;88728493;88728493;88728493;88728493;88728493;887…	88722925;88722925;88722925;88722829;88722925;88722925;88722925;88722829;88722925;88722829;88722852;88722829;88722829;88722925;88722829;88722925;88722829;88722925;88722827;88722827;88722865;88722925;88722829;88722925;88728628;88728628;88728628;88728628;88728628;88728628;88728628;88728628;88728628;88728628;88728628;88728628;88728628;88728628;88728628;88728628;88728628;88728628;88728628;88728628;887…	-;-;-;-;-;-;-;-;-;-;-;-;-;-;-;-;-;-;-;-;-;-;-;-;-;-;-;-;-;-;-;-;-;-;-;-;-;-;-;-;-;-;-;-;-;-;-;-;-;-;-;-;-;-;-;-;-;-;-;-;-;-;-;-;-;-;-;-;-;-;-;-;-;-;-;-;-;-;-;-;-;-;-;-;-;-;-;-;-;-;-;-;-;-;-;-;-;-;-;-;-;-;-;-;-;-;-;-;-;-;-;-;-;-;-;-;-;-;-;-;-;-;-;-;-;-;-;-	11755	12.3319	12.836	17.658	17.8639	5.56142e-17	1.04266e-14	-0.479193
HLA-B	6;6;6;6;6;6;6;6;6;6;6;6;6;6;6;6;6;6;6;6;6;6;6	31353872;31353872;31353872;31354479;31354479;31354479;31354633;31354633;31355107;31355122;31355317;31355317;31355391;31355507;31355522;31356167;31356167;31356167;31356688;31356688;31356688;31357086;31357086	31354296;31354296;31354296;31354526;31354806;31354526;31355076;31354665;31355223;31355223;31355802;31355592;31355592;31355592;31356442;31356957;31356442;31356442;31356905;31357188;31356957;31357179;31357187	-;-;-;-;-;-;-;-;-;-;-;-;-;-;-;-;-;-;-;-;-;-;-	3012	298.504	299.715	233.023	228.007	5.96137e-17	1.10402e-14	0.393755
ARHGAP11A	15;15;15;15;15;15;15;15;15;15;15;15;15;15;15;15;15;15;15;15;15;15;15;15;15;15;15;15;15;15;15;15;15;15;15;15;15;15;15;15;15;15;15;15;15;15;15;15;15;15;15;15;15;15;15;15;15;15;15;15;15;15;15;15;15;15;15;15;15;15;15	32615144;32615152;32615490;32615539;32615565;32615571;32615805;32615805;32620108;32620108;32620108;32620108;32620108;32623492;32623492;32623492;32623492;32623492;32624173;32624173;32624173;32624173;32624173;32625080;32625080;32625080;32625080;32625080;32625487;32625487;32625487;32625487;32625487;32628728;32628728;32628728;32628728;32628728;32628728;32629595;32629595;32629595;32629595;32629595;326…	32615253;32615253;32616340;32616340;32616340;32615607;32615918;32616250;32620178;32620178;32620178;32620178;32620178;32623588;32623588;32623588;32623588;32623588;32624426;32624426;32624426;32624426;32624426;32625243;32625243;32625243;32625243;32625243;32625633;32625633;32625633;32625633;32625633;32628802;32628802;32628802;32628802;32628802;32628802;32629675;32629762;32629762;32629762;32629762;326…	+;+;+;+;+;+;+;+;+;+;+;+;+;+;+;+;+;+;+;+;+;+;+;+;+;+;+;+;+;+;+;+;+;+;+;+;+;+;+;+;+;+;+;+;+;+;+;+;+;+;+;+;+;+;+;+;+;+;+;+;+;+;+;+;+;+;+;+;+;+;+	6428	35.9989	35.2948	48.7574	49.3566	6.39954e-17	1.17088e-14	-0.442634
LAMP5	20;20;20;20;20;20;20;20;20;20;20	9514358;9514361;9515453;9515453;9516000;9516256;9516256;9518040;9518040;9529642;9529642	9514916;9514916;9515625;9515625;9516131;9516361;9516361;9518228;9518228;9530524;9529923	+;+;+;+;+;+;+;+;+;+;+	2042	32.5555	32.9518	19.7143	18.555	6.63074e-17	1.19874e-14	0.792919
ASPM	1;1;1;1;1;1;1;1;1;1;1;1;1;1;1;1;1;1;1;1;1;1;1;1;1;1;1;1;1;1;1;1;1;1;1;1;1;1;1;1;1;1;1;1;1;1;1;1;1;1;1;1;1;1;1;1;1;1;1;1;1;1;1;1;1;1;1;1;1;1;1;1;1;1;1;1;1;1;1;1;1;1;1;1;1;1;1;1;1;1	197084128;197084128;197084132;197086803;197086803;197086803;197088205;197088256;197088256;197088256;197089930;197089930;197089930;197089930;197090196;197090196;197090196;197090196;197090850;197090850;197090850;197090850;197091907;197091907;197091907;197091907;197093052;197093052;197093052;197093052;197094084;197094084;197094084;197094084;197095998;197095998;197095998;197095998;197100431;197100431…	197084426;197084426;197084426;197086972;197086972;197086972;197088432;197088432;197088432;197088432;197090084;197090084;197090084;197090084;197090388;197090388;197090388;197090388;197091041;197091041;197091041;197091041;197092056;197092056;197092056;197092056;197093261;197093261;197093261;197093261;197094180;197094180;197094180;197094180;197096164;197096164;197096164;197096164;197102647;197105185…	-;-;-;-;-;-;-;-;-;-;-;-;-;-;-;-;-;-;-;-;-;-;-;-;-;-;-;-;-;-;-;-;-;-;-;-;-;-;-;-;-;-;-;-;-;-;-;-;-;-;-;-;-;-;-;-;-;-;-;-;-;-;-;-;-;-;-;-;-;-;-;-;-;-;-;-;-;-;-;-;-;-;-;-;-;-;-;-;-;-	10938	10.3347	10.5802	14.8995	15.4978	7.06342e-17	1.26194e-14	-0.521344
BEST1	11;11;11;11;11;11;11;11;11;11;11;11;11;11;11;11;11;11;11;11;11;11;11;11;11;11;11;11;11;11;11;11;11;11;11;11;11;11;11;11;11;11;11;11;11;11;11;11;11;11;11;11;11;11;11;11;11;11;11;11;11;11	61949821;61950063;61950353;61950356;61950360;61950360;61950370;61951771;61951771;61951771;61955107;61955107;61955107;61955107;61955107;61955107;61955107;61955157;61955343;61955343;61955718;61955718;61955718;61955718;61955718;61955718;61956844;61956844;61956844;61956844;61956844;61956844;61956844;61957387;61957387;61957387;61957387;61957387;61957387;61958146;61958146;61958146;61958146;61958146;619…	61950427;61950427;61950427;61950427;61950427;61950427;61950427;61951958;61951958;61951958;61955201;61955201;61955951;61955201;61955951;61955201;61955201;61955201;61955387;61955387;61955951;61955951;61955951;61955951;61955951;61955951;61956998;61956998;61956998;61956998;61956998;61956866;61956998;61957464;61957464;61957464;61957464;61957464;61957464;61958501;61958298;61958501;61959578;61958929;619…	+;+;+;+;+;+;+;+;+;+;+;+;+;+;+;+;+;+;+;+;+;+;+;+;+;+;+;+;+;+;+;+;+;+;+;+;+;+;+;+;+;+;+;+;+;+;+;+;+;+;+;+;+;+;+;+;+;+;+;+;+;+	8930	25.8619	25.7357	19.2122	18.93	7.2423e-17	1.27886e-14	0.453829
VAT1L	16;16;16;16;16;16;16;16;16;16;16;16;16	77788530;77816921;77825246;77862748;77862748;77876370;77876370;77879169;77879169;77882097;77884608;77971850;77977597	77788915;77817050;77825461;77862890;77862890;77876473;77876473;77879224;77879224;77882408;77884802;77971933;77980107	+;+;+;+;+;+;+;+;+;+;+;+;+	4137	14.6513	14.5891	8.01428	8.61322	8.55095e-17	1.49258e-14	0.832753
TMSB4X	X;X;X;X;X;X;X;X;X;X;X	12975108;12975110;12975244;12975658;12976246;12976246;12976246;12976777;12976777;12976777;12976777	12975168;12976361;12975443;12975731;12976361;12976361;12976361;12977227;12977081;12977226;12977227	+;+;+;+;+;+;+;+;+;+;+	1705	352.459	351.676	269.005	270.695	9.12225e-17	1.56378e-14	0.401678
PTPN13	4;4;4;4;4;4;4;4;4;4;4;4;4;4;4;4;4;4;4;4;4;4;4;4;4;4;4;4;4;4;4;4;4;4;4;4;4;4;4;4;4;4;4;4;4;4;4;4;4;4;4;4;4;4;4;4;4;4;4;4;4;4;4;4;4;4;4;4;4;4;4;4;4;4;4;4;4;4;4;4;4;4;4;4;4;4;4;4;4;4;4;4;4;4;4;4;4;4;4;4;4;4;4;4;4;4;4;4;4;4;4;4;4;4;4;4;4;4;4;4;4;4;4;4;4;4;4;4;4;4;4;4;4;4;4;4;4;4;4;4;4;4;4;4;4;4;4;4;4;4;4;4;4;4;4;4;4;4;4;4;4;4;4;4;4;4;4;4;4;4;4;4;4;4;4;4;4;4;4;4;4;4;4;4;4;4;4;4;4;4;4;4;4;4;4;4;4;4;4;4…	86594315;86594315;86594317;86594732;86594732;86595693;86635252;86635252;86635252;86635252;86635252;86635252;86635252;86672365;86672365;86672365;86672365;86672365;86672365;86672365;86686710;86686710;86686710;86686710;86686710;86686710;86686710;86689005;86689005;86689005;86689005;86689005;86689005;86689005;86689620;86693587;86693587;86693587;86693587;86693587;86701241;86701241;86701241;86701241;867…	86594789;86594789;86594789;86594789;86594789;86595786;86635371;86635371;86635371;86635371;86635371;86635371;86635371;86672543;86672543;86672543;86672543;86672543;86672543;86672543;86686775;86686775;86686775;86686775;86686775;86686775;86686775;86689061;86689190;86689190;86689190;86689190;86689190;86689190;86690303;86693674;86693674;86693674;86693674;86693674;86701801;86701801;86701801;86701801;867…	+;+;+;+;+;+;+;+;+;+;+;+;+;+;+;+;+;+;+;+;+;+;+;+;+;+;+;+;+;+;+;+;+;+;+;+;+;+;+;+;+;+;+;+;+;+;+;+;+;+;+;+;+;+;+;+;+;+;+;+;+;+;+;+;+;+;+;+;+;+;+;+;+;+;+;+;+;+;+;+;+;+;+;+;+;+;+;+;+;+;+;+;+;+;+;+;+;+;+;+;+;+;+;+;+;+;+;+;+;+;+;+;+;+;+;+;+;+;+;+;+;+;+;+;+;+;+;+	9496	3.4333	3.60737	6.18273	6.56425	9.16476e-17	1.56378e-14	-0.838069
HCK	20;20;20;20;20;20;20;20;20;20;20;20;20;20;20;20;20;20;20;20;20;20;20;20;20;20;20;20;20;20;20;20;20;20;20;20;20;20;20;20;20;20;20;20;20;20;20;20;20;20;20;20;20;20;20;20;20;20;20;20;20;20;20;20;20;20;20;20;20;20;20;20;20;20;20;20;20;20;20;20;20;20;20;20;20;20;20;20;20;20;20;20;20;20;20;20;20;20;20;20;20;20;20;20;20;20;20;20;20;20;20;20;20;20;20;20;20;20;20;20;20;20;20	32052188;32052188;32052197;32052242;32052242;32052242;32052242;32052261;32052261;32052288;32054216;32069688;32069688;32069688;32071662;32071662;32071662;32071662;32071662;32071662;32071662;32071662;32071662;32071662;32073319;32073319;32073319;32073319;32073319;32073319;32073319;32073319;32073319;32073716;32073716;32073716;32073716;32073716;32073716;32073716;32073719;32073719;32074623;32074623;320…	32052486;32052486;32052486;32052486;32052486;32052486;32052486;32052486;32052486;32052486;32054281;32069751;32069751;32069751;32072589;32071782;32071782;32071782;32071782;32071782;32071782;32071782;32071782;32071782;32073361;32073361;32073361;32073361;32073361;32073361;32073361;32073361;32073361;32073818;32073818;32073818;32073818;32073818;32073818;32073818;32073818;32073818;32074721;32074721;320…	+;+;+;+;+;+;+;+;+;+;+;+;+;+;+;+;+;+;+;+;+;+;+;+;+;+;+;+;+;+;+;+;+;+;+;+;+;+;+;+;+;+;+;+;+;+;+;+;+;+;+;+;+;+;+;+;+;+;+;+;+;+;+;+;+;+;+;+;+;+;+;+;+;+;+;+;+;+;+;+;+;+;+;+;+;+;+;+;+;+;+;+;+;+;+;+;+;+;+;+;+;+;+;+;+;+;+;+;+;+;+;+;+;+;+;+;+;+;+;+;+;+;+	3092	29.4708	27.1693	16.7499	17.9553	1.03343e-16	1.73432e-14	0.725158
MAP7	6;6;6;6;6;6;6;6;6;6;6;6;6;6;6;6;6;6;6;6;6;6;6;6;6;6;6;6;6;6;6;6;6;6;6;6;6;6;6;6;6;6;6;6;6;6;6;6;6;6;6;6;6;6;6;6;6;6;6;6;6;6;6;6;6;6;6;6;6;6;6;6;6;6;6;6;6;6;6;6;6;6;6;6;6;6;6;6;6;6;6;6;6;6;6;6;6;6;6;6;6;6;6;6;6;6;6;6;6;6;6;6;6;6;6;6;6;6;6;6;6;6;6;6;6;6;6;6;6;6;6;6;6;6;6;6;6;6;6;6;6;6;6;6;6;6;6;6;6;6;6;6;6;6;6;6	136342281;136342281;136342281;136342281;136342737;136343543;136343782;136343819;136343840;136345856;136345856;136345856;136345856;136345856;136345856;136345856;136345856;136345856;136356692;136356692;136356692;136356692;136356692;136356692;136356692;136356692;136356692;136359820;136359820;136359820;136359820;136359820;136359820;136359820;136359820;136359820;136359981;136359981;136359981;136359981…	136344238;136344238;136344238;136344238;136344238;136344238;136344238;136344238;136344238;136346079;136346079;136346079;136346079;136346079;136346079;136346079;136346079;136346079;136356794;136356794;136356794;136356794;136356794;136356794;136356794;136356794;136356794;136359877;136359877;136359877;136359877;136359877;136359877;136359877;136359877;136359877;136360031;136360031;136360031;136360031…	-;-;-;-;-;-;-;-;-;-;-;-;-;-;-;-;-;-;-;-;-;-;-;-;-;-;-;-;-;-;-;-;-;-;-;-;-;-;-;-;-;-;-;-;-;-;-;-;-;-;-;-;-;-;-;-;-;-;-;-;-;-;-;-;-;-;-;-;-;-;-;-;-;-;-;-;-;-;-;-;-;-;-;-;-;-;-;-;-;-;-;-;-;-;-;-;-;-;-;-;-;-;-;-;-;-;-;-;-;-;-;-;-;-;-;-;-;-;-;-;-;-;-;-;-;-;-;-	5447	7.42125	7.35367	12.7633	12.6088	1.03927e-16	1.73432e-14	-0.762101
SSR1	6;6;6;6;6;6;6;6;6;6;6;6;6;6;6;6;6;6;6;6;6;6;6;6;6;6;6;6;6;6;6;6;6;6;6;6;6;6;6;6;6;6;6;6;6;6;6;6;6;6;6;6;6;6;6;6;6;6;6;6;6;6;6;6;6;6	7268306;7268938;7281143;7287570;7287862;7288682;7289676;7289683;7289868;7295056;7295088;7295088;7295385;7295392;7295392;7295392;7295392;7296883;7297923;7297923;7297923;7297923;7297923;7297923;7297923;7298747;7298747;7298747;7298747;7298747;7298747;7298747;7301310;7301310;7301310;7301310;7301310;7301310;7301310;7301333;7301390;7303550;7303550;7303550;7303550;7303550;7303550;7303550;7303550;7309917…	7269154;7269154;7289931;7289931;7287922;7289931;7289931;7289850;7289931;7295485;7295102;7295102;7295485;7295485;7295485;7295485;7295485;7297209;7298001;7298001;7298001;7298001;7298001;7298001;7298001;7298823;7298823;7298823;7298823;7298823;7298823;7298823;7301363;7301572;7301572;7301368;7301572;7301572;7301572;7301572;7301572;7303633;7303637;7303637;7303637;7303637;7303637;7303637;7303637;7310029…	-;-;-;-;-;-;-;-;-;-;-;-;-;-;-;-;-;-;-;-;-;-;-;-;-;-;-;-;-;-;-;-;-;-;-;-;-;-;-;-;-;-;-;-;-;-;-;-;-;-;-;-;-;-;-;-;-;-;-;-;-;-;-;-;-;-	11349	10.93	10.7599	15.6672	15.2886	1.44014e-16	2.37717e-14	-0.495255
CCDC136	7;7;7;7;7;7;7;7;7;7;7;7;7;7;7;7;7;7;7;7;7;7;7;7;7;7;7;7;7;7;7;7;7;7;7;7;7;7;7;7;7;7;7;7;7;7;7;7;7;7;7;7;7;7;7;7;7;7;7;7;7;7;7;7;7;7;7;7;7;7;7;7;7;7;7;7;7;7;7;7;7;7;7;7;7;7;7;7;7;7;7;7;7;7;7;7;7;7;7;7;7;7;7;7;7;7;7;7;7	128790757;128791410;128791444;128791450;128791458;128791618;128792018;128792045;128792100;128792270;128792320;128792320;128792320;128792320;128792320;128794348;128794348;128794348;128794348;128794348;128794348;128794348;128794694;128794694;128794694;128794694;128794694;128794694;128801186;128801186;128801186;128801186;128801186;128801186;128801210;128804650;128804650;128804650;128804650;128804650…	128790976;128791551;128791551;128791551;128791551;128791886;128792427;128792427;128792183;128792428;128792427;128792427;128792427;128792427;128792427;128794602;128794522;128794602;128794602;128794602;128794602;128794602;128794768;128794768;128794768;128794768;128794768;128794728;128801509;128801509;128801509;128801509;128801473;128801250;128801509;128804761;128804761;128804761;128804761;128804761…	+;+;+;+;+;+;+;+;+;+;+;+;+;+;+;+;+;+;+;+;+;+;+;+;+;+;+;+;+;+;+;+;+;+;+;+;+;+;+;+;+;+;+;+;+;+;+;+;+;+;+;+;+;+;+;+;+;+;+;+;+;+;+;+;+;+;+;+;+;+;+;+;+;+;+;+;+;+;+;+;+;+;+;+;+;+;+;+;+;+;+;+;+;+;+;+;+;+;+;+;+;+;+;+;+;+;+;+;+	6188	3.24057	3.23654	6.9807	6.24459	1.82911e-16	2.98677e-14	-1.01235
ALDH1L2	12;12;12;12;12;12;12;12;12;12;12;12;12;12;12;12;12;12;12;12;12;12;12;12;12;12;12;12;12;12;12;12;12;12;12;12;12;12;12;12;12;12;12;12;12;12;12;12;12;12;12;12;12;12;12;12;12;12;12;12;12;12;12;12;12;12;12;12;12;12	105019784;105019790;105024424;105026545;105026545;105026545;105030070;105030324;105030324;105030324;105031769;105031769;105031769;105031769;105034300;105034300;105034300;105038103;105038103;105038103;105039713;105039713;105039713;105040607;105040607;105040607;105046710;105046710;105046710;105046899;105046899;105046899;105049908;105049908;105049908;105052090;105052090;105052090;105052812;105052812…	105024479;105024479;105024479;105026744;105026744;105026744;105030429;105030429;105030429;105030429;105031935;105031890;105031934;105031934;105034398;105034398;105034398;105038202;105038202;105038202;105039806;105039806;105039806;105040694;105040694;105040694;105046815;105046815;105046815;105046969;105046969;105046969;105050058;105050058;105050707;105052217;105052217;105052217;105052931;105052931…	-;-;-;-;-;-;-;-;-;-;-;-;-;-;-;-;-;-;-;-;-;-;-;-;-;-;-;-;-;-;-;-;-;-;-;-;-;-;-;-;-;-;-;-;-;-;-;-;-;-;-;-;-;-;-;-;-;-;-;-;-;-;-;-;-;-;-;-;-;-	8507	18.9056	18.7595	13.5957	13.3396	2.02671e-16	3.27422e-14	0.501611
AARS	16;16;16;16;16;16;16;16;16;16;16;16;16;16;16;16;16;16;16;16;16;16;16;16;16;16;16;16;16;16;16;16;16;16;16;16;16;16;16;16;16;16;16;16;16;16	70252295;70253268;70253456;70253714;70253919;70253919;70254390;70254621;70254621;70254621;70255728;70255728;70255728;70255735;70258033;70258033;70258033;70258980;70258980;70258980;70259024;70259036;70261044;70261044;70261044;70261044;70261044;70262346;70262346;70262346;70262473;70264958;70264958;70264958;70265538;70265538;70267659;70267659;70268271;70269618;70270196;70271781;70276486;70276966;702…	70252906;70253381;70253800;70253800;70254038;70254038;70254483;70254734;70254734;70254734;70255836;70255836;70255836;70255836;70258217;70258215;70258217;70259186;70259186;70259186;70259186;70259186;70261157;70261157;70261413;70261157;70261157;70262484;70262361;70262524;70262524;70265515;70264985;70265102;70265662;70265662;70267796;70267809;70268379;70269763;70270340;70271972;70276631;70277154;702…	-;-;-;-;-;-;-;-;-;-;-;-;-;-;-;-;-;-;-;-;-;-;-;-;-;-;-;-;-;-;-;-;-;-;-;-;-;-;-;-;-;-;-;-;-;-	4498	92.266	88.286	67.9486	68.089	2.26927e-16	3.62749e-14	0.426505
WARS	14;14;14;14;14;14;14;14;14;14;14;14;14;14;14;14;14;14;14;14;14;14;14;14;14;14;14;14;14;14;14;14;14;14;14;14;14;14;14;14;14;14;14;14;14;14;14;14;14;14;14;14;14;14;14;14;14;14;14;14;14;14;14;14;14;14;14;14;14;14;14;14;14;14;14;14;14;14;14;14;14;14;14;14;14;14;14;14;14;14;14;14;14;14;14;14;14;14;14;14;14;14;14;14;14;14;14;14;14;14;14;14;14;14;14;14;14;14;14;14;14;14;14;14;14;14;14;14;14;14;14;14;14;…	100333788;100333802;100333818;100333828;100334479;100334493;100334927;100336841;100337062;100337062;100337062;100337062;100337062;100337062;100337062;100342050;100342398;100342398;100342398;100342398;100342398;100342398;100342398;100342398;100343275;100343275;100343275;100343275;100343275;100343275;100343275;100343275;100346746;100346746;100346746;100346746;100346746;100346746;100346746;100346746…	100335036;100335036;100335036;100335036;100335036;100335036;100335036;100337202;100337202;100337202;100337202;100337202;100337202;100337202;100337202;100342571;100342571;100342534;100342571;100342571;100342571;100342571;100342571;100342571;100343387;100343387;100343387;100343387;100343387;100343387;100343387;100343387;100346846;100346829;100346846;100346846;100346846;100346846;100346846;100346846…	-;-;-;-;-;-;-;-;-;-;-;-;-;-;-;-;-;-;-;-;-;-;-;-;-;-;-;-;-;-;-;-;-;-;-;-;-;-;-;-;-;-;-;-;-;-;-;-;-;-;-;-;-;-;-;-;-;-;-;-;-;-;-;-;-;-;-;-;-;-;-;-;-;-;-;-;-;-;-;-;-;-;-;-;-;-;-;-;-;-;-;-;-;-;-;-;-;-;-;-;-;-;-;-;-;-;-;-;-;-;-;-;-;-;-;-;-;-;-;-;-;-;-;-;-;-;-;-	6358	27.9705	28.3073	19.7277	20.8576	2.6736e-16	4.22931e-14	0.489766
RP11-1007O24.3	15;15;15;15;15	72407778;72409374;72421425;72472844;72473875	72407845;72409516;72421601;72475168;72474209	-;-;-;-;-	2713	4.89402	5.74537	11.3705	11.8173	2.84081e-16	4.44748e-14	-1.10546
SARS	1;1;1;1;1;1;1;1;1;1;1;1;1;1;1;1;1;1;1;1;1;1;1;1;1;1;1;1;1;1;1;1;1;1	109213918;109213932;109213968;109213982;109214547;109223978;109223978;109223978;109228352;109228352;109228352;109229414;109229414;109229414;109230878;109230878;109231158;109231631;109231631;109235210;109235210;109235210;109235210;109235977;109235977;109236231;109236391;109236391;109236805;109237244;109237244;109237731;109237731;109237731	109214128;109214128;109214128;109214128;109215153;109224048;109224048;109224048;109228432;109228432;109228432;109229572;109229572;109229572;109231021;109231021;109231786;109231786;109231786;109235431;109235431;109235431;109235431;109236106;109236106;109237373;109236548;109236548;109236870;109237373;109237373;109238169;109238148;109238120	+;+;+;+;+;+;+;+;+;+;+;+;+;+;+;+;+;+;+;+;+;+;+;+;+;+;+;+;+;+;+;+;+;+	3836	57.9172	55.5882	41.5767	42.2665	3.27165e-16	5.06972e-14	0.45511
SRSF9	12;12;12;12;12;12;12;12;12;12;12;12;12;12;12;12;12	120461668;120461693;120461711;120461762;120463950;120463950;120463950;120463978;120464733;120465139;120465627;120465627;120465756;120469422;120469422;120469422;120469422	120462162;120463396;120462162;120462162;120464943;120464122;120464122;120464122;120464822;120465787;120465787;120465787;120465787;120469571;120469639;120469718;120469793	-;-;-;-;-;-;-;-;-;-;-;-;-;-;-;-;-	3744	37.8802	38.631	77.0418	68.8312	3.35531e-16	5.14685e-14	-0.913294
PHGDH	1;1;1;1;1;1;1;1;1;1;1;1;1;1;1;1;1;1;1;1;1;1;1;1;1;1;1;1;1;1;1;1;1;1;1;1;1;1;1;1;1;1;1;1;1;1	119659798;119669191;119711884;119711887;119711906;119719627;119721170;119721170;119721170;119721170;119723376;119723376;119723376;119723376;119724319;119726851;119726851;119726851;119726851;119727004;119727004;119727004;119727004;119729509;119729940;119734304;119734634;119734634;119734634;119735295;119735295;119735295;119737114;119737114;119739462;119740386;119740386;119741767;119741767;119741767…	119659913;119669401;119712160;119712160;119712160;119721321;119721321;119721321;119721495;119721321;119723441;119723441;119723441;119723441;119724469;119726905;119726905;119726905;119726905;119727102;119727102;119727102;119727102;119729633;119730071;119734766;119734766;119734766;119734676;119735429;119735443;119735443;119737266;119737266;119740518;119740518;119740518;119741897;119741897;119741897…	+;+;+;+;+;+;+;+;+;+;+;+;+;+;+;+;+;+;+;+;+;+;+;+;+;+;+;+;+;+;+;+;+;+;+;+;+;+;+;+;+;+;+;+;+;+	5622	58.0073	57.3044	44.3953	42.8534	3.89194e-16	5.9103e-14	0.420239
NCF1C	7;7;7;7;7;7;7;7;7;7;7	75156639;75157250;75157866;75160659;75162326;75162897;75165124;75166537;75166802;75168632;75171872	75156915;75157395;75157970;75160776;75162433;75163019;75165179;75166702;75166877;75168710;75172044	-;-;-;-;-;-;-;-;-;-;-	1427	56.4004	55.409	36.1032	34.9521	4.66897e-16	7.0201e-14	0.671762
FEZ2	2;2;2;2;2;2;2;2;2;2;2;2;2;2;2;2;2;2;2;2;2;2;2;2;2;2;2;2;2;2;2;2;2;2;2;2;2;2;2;2;2;2;2;2;2;2;2;2;2;2;2;2;2;2;2;2;2;2;2;2;2;2;2;2;2;2;2;2;2;2;2;2;2;2;2;2;2;2;2;2;2;2;2;2;2;2;2	36531805;36551427;36552056;36552056;36552258;36552258;36552258;36552258;36552263;36552294;36552304;36552711;36552783;36552947;36554170;36555289;36555683;36555683;36555683;36555683;36555683;36555683;36555683;36555683;36555683;36555683;36555683;36555683;36555688;36555977;36558438;36558438;36558438;36558438;36558438;36558438;36558438;36558438;36558438;36558438;36558438;36558438;36560785;36560785;365…	36532021;36551491;36552268;36552168;36553179;36553179;36553179;36553179;36553179;36553179;36553179;36553179;36553179;36553179;36554262;36555748;36555748;36555748;36555748;36555748;36555748;36555748;36555748;36555748;36555748;36559255;36555748;36555748;36555748;36556060;36558513;36558513;36558637;36558513;36558513;36558513;36558513;36558513;36558513;36558513;36558513;36558513;36560865;36560845;365…	-;-;-;-;-;-;-;-;-;-;-;-;-;-;-;-;-;-;-;-;-;-;-;-;-;-;-;-;-;-;-;-;-;-;-;-;-;-;-;-;-;-;-;-;-;-;-;-;-;-;-;-;-;-;-;-;-;-;-;-;-;-;-;-;-;-;-;-;-;-;-;-;-;-;-;-;-;-;-;-;-;-;-;-;-;-;-	8938	1.65848	1.47017	3.31978	3.43443	4.85031e-16	7.22126e-14	-1.09173
GGT5	22;22;22;22;22;22;22;22;22;22;22;22;22;22;22;22;22;22;22;22;22;22;22;22;22;22;22;22;22;22;22;22;22;22;22;22;22;22;22;22;22;22;22;22	24219654;24219654;24219660;24219660;24220492;24224996;24224996;24224996;24224996;24225245;24225245;24225245;24225245;24225546;24225546;24225546;24225546;24226076;24226076;24226076;24226076;24226631;24226631;24226631;24231384;24231384;24231384;24232051;24232051;24232051;24232823;24232823;24232823;24232973;24233498;24233498;24233874;24233874;24233874;24241089;24244553;24244553;24244553;24244553	24220116;24220116;24220116;24220116;24220584;24225106;24225106;24225106;24225106;24225414;24225411;24225411;24225411;24225652;24225652;24225652;24225652;24226112;24226266;24226266;24226266;24226767;24226767;24226767;24231530;24231530;24231530;24232208;24232208;24232208;24233018;24233018;24233018;24233018;24233593;24233593;24234004;24234004;24234004;24245108;24245082;24245059;24245142;24245078	-;-;-;-;-;-;-;-;-;-;-;-;-;-;-;-;-;-;-;-;-;-;-;-;-;-;-;-;-;-;-;-;-;-;-;-;-;-;-;-;-;-;-;-	6054	2.86164	2.76929	0.904043	1.0638	5.27298e-16	7.77432e-14	1.53558
AHNAK	11;11;11;11;11;11;11;11;11;11;11;11;11;11;11;11;11;11;11;11;11;11;11;11;11;11;11;11;11;11;11;11;11;11;11;11;11	62433542;62433546;62433547;62491732;62491732;62491811;62515905;62517010;62533984;62534046;62535003;62535003;62535003;62535003;62535003;62535003;62535088;62535945;62535945;62535945;62535945;62535945;62535945;62535945;62536239;62536469;62536469;62536469;62536469;62536469;62536469;62545566;62545566;62546660;62546660;62546660;62556188	62433891;62433891;62433891;62491831;62491831;62491831;62534074;62517357;62534074;62534074;62535190;62535190;62535190;62535190;62535190;62535190;62535190;62536098;62536098;62536098;62536098;62536098;62536107;62536098;62536287;62536567;62536567;62536567;62536567;62536567;62536567;62545663;62545687;62546833;62546835;62546796;62556235	-;-;-;-;-;-;-;-;-;-;-;-;-;-;-;-;-;-;-;-;-;-;-;-;-;-;-;-;-;-;-;-;-;-;-;-;-	19465	39.0631	41.3286	30.418	31.6083	5.54257e-16	8.09322e-14	0.391993
METTL7B	12;12;12;12;12	55681546;55681678;55683813;55683813;55684050	55682252;55682252;55684046;55684611;55684608	+;+;+;+;+	1506	15.2777	14.5623	6.57757	6.14927	5.70721e-16	8.25425e-14	1.24617
TYMP	22;22;22;22;22;22;22;22;22;22;22;22;22;22;22;22;22;22;22;22;22;22;22;22;22;22;22;22;22;22;22;22;22;22;22;22;22;22;22;22;22;22;22;22;22;22;22;22;22;22;22;22;22;22;22;22;22;22;22;22;22;22;22;22;22;22;22;22	50525752;50525752;50525752;50525755;50525756;50525757;50525785;50526001;50526001;50526001;50526001;50526001;50526001;50526001;50526246;50526246;50526246;50526246;50526246;50526246;50526576;50526576;50526576;50526576;50526576;50526576;50526576;50527165;50527165;50527165;50527165;50527165;50527165;50527588;50527588;50527588;50527588;50527588;50527588;50527588;50527792;50528512;50528512;50528512;505…	50525918;50525918;50525918;50525918;50525918;50525918;50525918;50526141;50526476;50526141;50526141;50526141;50526156;50526141;50526476;50526476;50526476;50526476;50526476;50526476;50526738;50526738;50526738;50526738;50526738;50526738;50526738;50527283;50527283;50527283;50527283;50527283;50527283;50527717;50527717;50527717;50527717;50527717;50527717;50527717;50529731;50528610;50528610;50528610;505…	-;-;-;-;-;-;-;-;-;-;-;-;-;-;-;-;-;-;-;-;-;-;-;-;-;-;-;-;-;-;-;-;-;-;-;-;-;-;-;-;-;-;-;-;-;-;-;-;-;-;-;-;-;-;-;-;-;-;-;-;-;-;-;-;-;-;-;-	3320	28.3234	29.6572	18.7468	19.5966	5.83174e-16	8.35479e-14	0.614681
RAB21	12;12;12;12;12;12;12;12;12;12;12;12;12;12;12;12	71754874;71769800;71770536;71770592;71770610;71773959;71773959;71773959;71782031;71782031;71782414;71782570;71782570;71785531;71785531;71785531	71755288;71769859;71770699;71770699;71770699;71774022;71774300;71774022;71782085;71782085;71782658;71782658;71782658;71785919;71785689;71800285	+;+;+;+;+;+;+;+;+;+;+;+;+;+;+;+	16036	1.78356	1.79427	3.4412	3.11029	6.78522e-16	9.62993e-14	-0.855184
ERP29	12;12;12;12;12;12;12;12;12;12;12;12	112013316;112013348;112013429;112013480;112014591;112018804;112019683;112019756;112019756;112022150;112022150;112022150	112013609;112013609;112013609;112013609;112015325;112019343;112019836;112019894;112019894;112023168;112023220;112023451	+;+;+;+;+;+;+;+;+;+;+;+	3083	252.752	241.99	193.487	189.729	7.13639e-16	1.00324e-13	0.386607
KIF14	1;1;1;1;1;1;1;1;1;1;1;1;1;1;1;1;1;1;1;1;1;1;1;1;1;1;1;1;1;1;1;1;1;1;1;1;1;1;1;1;1;1;1;1;1;1;1;1;1;1;1;1;1;1;1;1;1;1;1	200551497;200551500;200554468;200554468;200555380;200555380;200559330;200559330;200560722;200560722;200565069;200565069;200565445;200565445;200569911;200569911;200575591;200575591;200580254;200580254;200581201;200581201;200586101;200586101;200589217;200589217;200590125;200590125;200592080;200592080;200593667;200593667;200598237;200598237;200600050;200600050;200600356;200600356;200601896;200601896…	200553767;200553767;200554606;200554606;200555454;200555454;200559452;200559452;200560880;200560880;200565253;200565253;200565669;200565669;200570005;200570005;200575691;200575691;200580383;200580383;200581294;200581294;200586227;200586227;200589369;200589369;200590272;200590272;200592240;200592240;200593769;200593769;200598421;200598421;200600113;200600113;200600503;200600503;200602068;200602068…	-;-;-;-;-;-;-;-;-;-;-;-;-;-;-;-;-;-;-;-;-;-;-;-;-;-;-;-;-;-;-;-;-;-;-;-;-;-;-;-;-;-;-;-;-;-;-;-;-;-;-;-;-;-;-;-;-;-;-	7277	8.79799	9.07227	13.7119	13.5788	7.20093e-16	1.00324e-13	-0.592941
HEBP2	6;6;6;6;6;6;6;6;6;6;6;6;6;6;6	138403531;138404219;138404247;138405145;138405145;138405145;138405971;138405971;138405971;138405971;138412083;138412880;138412880;138412880;138412880	138403698;138404597;138404597;138405280;138405280;138405280;138406151;138406033;138406033;138406033;138412256;138413154;138413173;138422197;138413173	+;+;+;+;+;+;+;+;+;+;+;+;+;+;+	10356	7.01645	7.35941	10.7315	10.799	7.72066e-16	1.06587e-13	-0.564787
FGFR3	4;4;4;4;4;4;4;4;4;4;4;4;4;4;4;4;4;4;4;4;4;4;4;4;4;4;4;4;4;4;4;4;4;4;4;4;4;4;4;4;4;4;4;4;4;4;4;4;4;4;4;4;4;4;4;4;4;4;4;4;4;4;4;4;4;4;4;4;4;4;4;4;4;4;4;4;4;4;4;4;4;4;4;4;4;4;4;4;4;4;4;4;4;4;4;4;4;4;4;4;4;4;4;4;4;4;4;4;4;4;4;4;4;4;4;4;4;4;4;4;4;4;4;4;4;4;4;4;4;4;4	1793307;1793312;1793312;1793312;1793312;1793833;1793833;1793833;1793833;1793833;1793833;1793896;1799254;1799254;1799254;1799254;1799254;1799254;1799254;1799747;1799747;1799747;1799747;1799747;1799747;1799747;1801367;1801367;1801367;1801367;1801367;1801367;1801367;1801462;1801620;1801620;1801620;1801620;1801620;1801620;1801620;1801620;1801629;1801835;1801835;1801835;1801835;1801835;1801835;1801835…	1793465;1793465;1793465;1793465;1793465;1794043;1794043;1794043;1794043;1794043;1794043;1794043;1799523;1799523;1799523;1799523;1799523;1799523;1799523;1799812;1799812;1799812;1799812;1799812;1799812;1799812;1801536;1801536;1801536;1801536;1801536;1801536;1801536;1801536;1801743;1801743;1801743;1801743;1801743;1801743;1801743;1801743;1801743;1801923;1802025;1802025;1802025;1802025;1802025;1802025…	+;+;+;+;+;+;+;+;+;+;+;+;+;+;+;+;+;+;+;+;+;+;+;+;+;+;+;+;+;+;+;+;+;+;+;+;+;+;+;+;+;+;+;+;+;+;+;+;+;+;+;+;+;+;+;+;+;+;+;+;+;+;+;+;+;+;+;+;+;+;+;+;+;+;+;+;+;+;+;+;+;+;+;+;+;+;+;+;+;+;+;+;+;+;+;+;+;+;+;+;+;+;+;+;+;+;+;+;+;+;+;+;+;+;+;+;+;+;+;+;+;+;+;+;+;+;+;+	4834	1.06293	1.02171	3.36854	3.04383	8.62696e-16	1.18026e-13	-1.60279
HIP1	7;7;7;7;7;7;7;7;7;7;7;7;7;7;7;7;7;7;7;7;7;7;7;7;7;7;7;7;7;7;7;7;7;7;7;7;7;7;7;7;7;7;7;7;7;7;7;7;7;7;7;7;7;7;7;7;7;7;7;7;7;7;7;7;7;7;7;7;7;7;7;7;7;7;7;7;7;7;7;7;7;7;7;7;7;7;7;7;7;7;7;7;7;7;7;7;7;7;7;7;7;7;7;7;7;7;7	75533300;75534088;75538083;75539323;75539323;75539323;75541919;75541919;75541919;75542851;75542851;75542851;75544695;75544695;75544695;75545088;75545088;75545088;75546939;75546939;75547755;75547755;75548891;75548891;75548891;75553453;75553453;75553453;75554113;75554113;75554113;75554440;75554440;75554440;75555416;75555416;75555416;75556026;75556026;75556026;75556710;75556710;75556710;75557654;755…	75538224;75538224;75538224;75539431;75539431;75539431;75541980;75541980;75541980;75542974;75542974;75542974;75544800;75544800;75544800;75545188;75545188;75545188;75547032;75547032;75547813;75547813;75549001;75549001;75549001;75553589;75553589;75553589;75554220;75554220;75554220;75554526;75554526;75554526;75555551;75555551;75555551;75556169;75556169;75556169;75556811;75556811;75556811;75557770;755…	-;-;-;-;-;-;-;-;-;-;-;-;-;-;-;-;-;-;-;-;-;-;-;-;-;-;-;-;-;-;-;-;-;-;-;-;-;-;-;-;-;-;-;-;-;-;-;-;-;-;-;-;-;-;-;-;-;-;-;-;-;-;-;-;-;-;-;-;-;-;-;-;-;-;-;-;-;-;-;-;-;-;-;-;-;-;-;-;-;-;-;-;-;-;-;-;-;-;-;-;-;-;-;-;-;-;-	8953	38.9242	39.5673	29.924	30.4065	9.17659e-16	1.24425e-13	0.397601
YBX1	1;1;1;1;1;1;1;1;1;1;1;1;1;1;1;1;1;1;1;1;1;1;1;1;1	42682427;42682440;42682987;42683156;42683403;42683403;42693490;42693490;42693490;42693490;42696199;42696199;42696199;42696642;42696642;42696642;42696642;42697180;42697180;42697180;42697180;42700781;42700781;42701981;42701981	42682731;42682731;42683365;42683466;42683466;42683466;42693523;42693523;42693523;42693523;42696288;42696288;42696288;42696944;42696944;42696944;42696944;42697211;42697262;42697262;42697262;42701046;42701046;42702349;42702349	+;+;+;+;+;+;+;+;+;+;+;+;+;+;+;+;+;+;+;+;+;+;+;+;+	1930	971.615	965.019	1238.16	1256.95	9.93957e-16	1.33577e-13	-0.347552
RP11-124N14.3	10;10	17233325;17234702	17233898;17234833	-;-	706	172.673	167.383	117.885	119.254	1.16198e-15	1.54787e-13	0.538098
PECAM1	17;17;17;17;17;17;17;17;17;17;17;17;17;17;17;17;17;17;17;17;17;17;17;17;17;17;17;17;17;17;17;17;17;17;17;17;17;17;17;17;17;17;17	64319415;64329700;64341634;64348260;64350380;64352390;64353491;64354933;64356111;64360140;64363149;64363286;64363348;64369750;64369750;64369750;64370153;64370211;64375051;64375051;64375176;64375187;64375188;64375338;64377574;64377824;64377824;64377824;64377824;64377824;64377824;64378798;64378798;64378973;64390489;64390489;64390489;64390489;64390602;64390602;64390602;64398314;64413714	64323845;64329722;64341690;64348322;64350433;64352463;64353518;64355040;64356398;64360415;64363397;64363397;64363397;64370025;64370025;64370025;64370245;64370415;64375356;64375356;64375356;64375356;64375356;64375356;64378117;64378117;64378117;64378117;64378117;64378117;64378117;64378874;64378867;64379092;64390515;64390592;64390515;64390515;64390763;64390763;64390878;64398391;64413776	-;-;-;-;-;-;-;-;-;-;-;-;-;-;-;-;-;-;-;-;-;-;-;-;-;-;-;-;-;-;-;-;-;-;-;-;-;-;-;-;-;-;-	7759	32.6014	31.839	24.0064	24.786	1.25497e-15	1.65721e-13	0.419432
CADM1	11;11;11;11;11;11;11;11;11;11;11;11;11;11;11;11;11;11;11;11;11;11;11;11;11;11;11;11;11;11;11;11;11;11;11;11;11;11;11;11;11;11;11;11;11;11;11;11;11;11;11;11;11;11;11;11;11;11;11;11;11;11;11;11;11;11;11;11;11;11;11;11;11;11;11;11;11;11;11;11;11;11;11;11;11;11;11;11;11;11;11;11;11;11;11;11;11;11;11;11;11;11;11;11;11;11;11;11;11;11;11;11;11;11;11;11;11;11;11;11;11;11;11;11;11;11;11;11;11;11;11;11;11;…	115169218;115169236;115169236;115169589;115173625;115173626;115173626;115174307;115174307;115175341;115176295;115176327;115176330;115176408;115176467;115176467;115178644;115178644;115178644;115178644;115178644;115178644;115178644;115178644;115178644;115178644;115178644;115178644;115178644;115178644;115178644;115178644;115190609;115190888;115190888;115190888;115190888;115190888;115193838;115198406…	115169626;115169626;115176592;115169626;115176592;115176592;115176592;115176592;115176592;115176592;115176592;115176592;115176592;115176592;115176592;115176592;115178775;115178775;115178775;115178775;115179111;115178775;115178775;115178775;115178775;115178775;115178775;115178775;115178775;115178775;115178775;115178775;115190941;115191046;115190941;115190941;115190941;115190941;115194110;115198438…	-;-;-;-;-;-;-;-;-;-;-;-;-;-;-;-;-;-;-;-;-;-;-;-;-;-;-;-;-;-;-;-;-;-;-;-;-;-;-;-;-;-;-;-;-;-;-;-;-;-;-;-;-;-;-;-;-;-;-;-;-;-;-;-;-;-;-;-;-;-;-;-;-;-;-;-;-;-;-;-;-;-;-;-;-;-;-;-;-;-;-;-;-;-;-;-;-;-;-;-;-;-;-;-;-;-;-;-;-;-;-;-;-;-;-;-;-;-;-;-;-;-;-;-;-;-;-;-	11017	3.06661	2.89135	1.55604	1.4593	1.32621e-15	1.73619e-13	0.999694
TPX2	20;20;20;20;20;20;20;20;20;20;20;20;20;20;20;20;20;20;20;20;20;20;20;20;20;20;20;20;20;20;20;20;20;20;20;20;20	31739271;31739271;31742541;31742541;31757407;31757407;31760057;31760057;31766556;31766556;31770343;31770343;31771560;31771560;31775867;31775867;31777487;31777487;31778813;31778813;31780939;31782249;31782249;31783705;31783705;31792735;31792735;31793848;31793848;31794402;31794402;31797404;31797404;31798365;31798365;31800970;31800970	31739621;31739621;31742647;31742647;31757582;31757582;31760179;31760179;31766682;31766682;31770471;31770471;31771682;31771682;31775988;31775988;31777638;31777638;31778984;31778984;31781046;31782390;31782390;31783921;31783921;31792830;31792830;31794024;31794024;31794548;31794548;31797515;31797515;31798552;31798552;31801805;31801805	+;+;+;+;+;+;+;+;+;+;+;+;+;+;+;+;+;+;+;+;+;+;+;+;+;+;+;+;+;+;+;+;+;+;+;+;+	3605	36.6163	36.6263	49.8995	51.7035	1.34124e-15	1.74086e-13	-0.454092
DDIT3	12;12;12;12;12;12;12;12;12;12;12;12;12;12;12;12;12;12;12;12	57516588;57516589;57516593;57516593;57516809;57516953;57517269;57517269;57517269;57517269;57517269;57517706;57517706;57517706;57517706;57520418;57520418;57520418;57520418;57520418	57517180;57517180;57517743;57517180;57517180;57517180;57517753;57517542;57517595;57517438;57517424;57517753;57517753;57517753;57517753;57520511;57520511;57520517;57520517;57520492	-;-;-;-;-;-;-;-;-;-;-;-;-;-;-;-;-;-;-;-	1266	29.0927	29.9572	15.5775	15.7811	1.36408e-15	1.75551e-13	0.930899
KCTD3	1;1;1;1;1;1;1;1;1;1;1;1;1;1;1;1;1;1;1;1;1;1;1;1;1;1;1;1;1;1;1;1;1;1;1;1;1	215567392;215573786;215573786;215574073;215574073;215575901;215575901;215577670;215577670;215578001;215578001;215579000;215579000;215579909;215579909;215580972;215586495;215595356;215601867;215602085;215602170;215604132;215604132;215608017;215608017;215611825;215611825;215618088;215618245;215618705;215618886;215618886;215619153;215619153;215620057;215620057;215620057	215567768;215573839;215573839;215574118;215574118;215575974;215575974;215577728;215577728;215578081;215578081;215579137;215579137;215579999;215579999;215581179;215586685;215595471;215601954;215602201;215602201;215604302;215604302;215608172;215608172;215611921;215611921;215618154;215619291;215619070;215618951;215619070;215619291;215619291;215620203;215621731;215621807	+;+;+;+;+;+;+;+;+;+;+;+;+;+;+;+;+;+;+;+;+;+;+;+;+;+;+;+;+;+;+;+;+;+;+;+;+	4929	7.98899	7.23477	13.5357	12.7132	1.39441e-15	1.77945e-13	-0.768069
HES6	2;2;2;2;2;2;2;2;2;2;2;2;2;2;2;2;2;2;2;2;2;2;2;2;2;2;2;2;2;2	238238267;238238270;238238276;238238605;238238776;238238860;238239170;238239180;238239216;238239487;238239487;238239487;238239487;238239487;238239487;238239527;238239661;238239661;238239661;238239661;238239661;238239661;238239661;238239825;238239825;238239825;238239825;238239825;238239825;238240392	238239251;238239568;238239251;238239251;238239156;238239251;238239251;238239251;238239568;238239568;238239568;238239568;238239568;238239568;238239562;238239568;238239747;238240024;238239747;238239671;238239747;238239747;238239747;238240001;238240041;238239958;238240124;238240038;238239971;238240662	-;-;-;-;-;-;-;-;-;-;-;-;-;-;-;-;-;-;-;-;-;-;-;-;-;-;-;-;-;-	2037	2.52244	3.73704	9.85912	9.73876	1.4752e-15	1.86687e-13	-1.62777
SPTSSA	14;14	34432789;34462096	34435304;34462356	-;-	2777	5.22333	5.23767	10.3104	11.6803	1.49244e-15	1.87307e-13	-1.05275
NUP210	3;3;3;3;3;3;3;3;3;3;3;3;3;3;3;3;3;3;3;3;3;3;3;3;3;3;3;3;3;3;3;3;3;3;3;3;3;3;3;3;3;3;3;3;3;3;3;3;3;3;3;3;3;3;3;3;3;3;3;3;3;3;3;3;3;3;3	13316235;13319072;13319230;13319763;13321585;13322193;13323309;13325795;13327217;13328771;13330460;13332293;13335454;13336787;13336809;13337837;13339854;13339854;13340236;13341069;13341748;13341996;13343175;13351661;13351663;13351879;13352080;13352080;13352080;13353554;13353554;13353554;13353915;13353915;13353915;13358222;13358222;13360270;13360270;13365946;13365946;13371834;13371834;13373718;133…	13317781;13319155;13319325;13319979;13321835;13322339;13323432;13325931;13327437;13328946;13330634;13332384;13335612;13336918;13337029;13337917;13340033;13340033;13340298;13341141;13341883;13342123;13343303;13351980;13351980;13351980;13352184;13352184;13352184;13353660;13353660;13353660;13354694;13354107;13354107;13358395;13358395;13360491;13360491;13366091;13366091;13372032;13372032;13373873;133…	-;-;-;-;-;-;-;-;-;-;-;-;-;-;-;-;-;-;-;-;-;-;-;-;-;-;-;-;-;-;-;-;-;-;-;-;-;-;-;-;-;-;-;-;-;-;-;-;-;-;-;-;-;-;-;-;-;-;-;-;-;-;-;-;-;-;-	8182	13.2767	14.011	9.40353	9.45123	1.55035e-15	1.9298e-13	0.551172
MTSS1L	16;16;16;16;16;16;16;16;16;16;16;16;16;16;16;16;16;16;16;16;16;16;16;16;16;16;16;16;16;16;16;16;16;16;16;16;16;16;16;16	70661204;70663677;70664598;70664598;70664920;70664920;70665466;70665466;70674306;70674306;70674320;70676881;70676881;70676881;70676949;70677792;70677792;70677792;70677792;70678252;70678252;70678252;70678252;70679315;70679627;70679630;70679630;70679643;70679786;70679786;70679786;70679971;70679971;70679971;70680794;70680794;70680964;70680964;70685723;70685723	70664449;70664449;70664763;70664763;70665096;70665096;70665540;70665540;70674528;70674528;70674432;70676978;70676978;70676978;70676978;70677899;70677899;70677899;70677899;70678339;70678409;70678413;70678409;70679323;70679641;70679704;70679704;70679704;70679877;70679877;70679877;70680025;70680055;70680055;70680867;70680867;70681025;70681025;70685791;70686066	-;-;-;-;-;-;-;-;-;-;-;-;-;-;-;-;-;-;-;-;-;-;-;-;-;-;-;-;-;-;-;-;-;-;-;-;-;-;-;-	4999	27.1788	27.1471	19.7704	19.1365	1.83991e-15	2.25092e-13	0.499396
GOLGA8O	15;15;15;15;15;15;15;15;15;15;15;15;15;15;15;15;15;15;15;15;15;15;15;15;15;15	32445106;32445367;32445618;32445798;32446474;32446997;32448318;32448642;32449275;32449558;32449772;32450913;32451118;32451165;32451291;32451291;32451601;32451601;32452491;32452491;32452753;32452753;32453703;32453703;32454734;32455489	32445281;32445522;32445715;32445898;32446565;32447072;32448386;32448898;32449362;32449665;32449858;32451022;32451202;32451202;32451338;32451338;32451639;32451639;32452571;32452571;32452812;32452812;32453822;32453822;32454902;32455634	-;-;-;-;-;-;-;-;-;-;-;-;-;-;-;-;-;-;-;-;-;-;-;-;-;-	2166	102.173	101.961	136.218	135.688	1.84576e-15	2.25092e-13	-0.395619
XXbac-BPG248L24.12	6	31356647	31357637	+	991	371.567	371.683	290.288	285.043	1.85279e-15	2.25092e-13	0.387377
NAV3	12;12;12;12;12;12;12;12;12;12;12;12;12;12;12;12;12;12;12;12;12;12;12;12;12;12;12;12;12;12;12;12;12;12;12;12;12;12;12;12;12;12;12;12;12;12;12;12;12;12;12;12;12;12;12;12;12;12;12;12;12;12;12;12;12;12;12;12;12;12;12;12;12;12;12;12;12;12;12;12;12;12;12;12;12;12;12;12;12;12;12;12;12;12;12;12;12;12;12;12;12;12;12;12;12;12;12;12;12;12;12;12;12;12;12;12;12;12;12;12;12;12;12;12;12;12;12;12;12;12;12;12;12;…	77324641;77571859;77830905;77831289;77831289;77940267;77940319;77940319;77940319;77940319;77940319;77941081;77941081;77941081;77941081;77941081;77941081;77947428;77950552;77966229;77966229;77966229;77966229;77966276;77966276;77968519;77968519;77968519;77968519;77968519;77968519;77994803;77994803;77994803;77994803;77998337;77998337;77998337;77998337;77998337;77998337;78006419;78006419;78006419;780…	77325214;77572266;77831704;77831704;77831704;77940436;77940436;77940436;77940436;77940436;77940436;77941133;77941133;77941133;77941133;77941133;77941133;77947553;77950895;77966301;77966301;77966301;77966301;77966301;77966301;77968702;77968702;77968702;77968702;77968702;77968702;77994871;77994871;77994871;77994871;77998476;77998476;77998476;77998476;77998476;77998476;78006766;78007445;78007445;780…	+;+;+;+;+;+;+;+;+;+;+;+;+;+;+;+;+;+;+;+;+;+;+;+;+;+;+;+;+;+;+;+;+;+;+;+;+;+;+;+;+;+;+;+;+;+;+;+;+;+;+;+;+;+;+;+;+;+;+;+;+;+;+;+;+;+;+;+;+;+;+;+;+;+;+;+;+;+;+;+;+;+;+;+;+;+;+;+;+;+;+;+;+;+;+;+;+;+;+;+;+;+;+;+;+;+;+;+;+;+;+;+;+;+;+;+;+;+;+;+;+;+;+;+;+;+;+;+	12135	3.35739	3.42404	1.9047	1.79359	1.88037e-15	2.26629e-13	0.892019
FGL2	7;7;7	77193371;77198860;77199181	77196985;77199848;77199826	-;-;-	4604	9.88625	10.265	5.79646	5.68725	2.24932e-15	2.68962e-13	0.828903
INCENP	11;11;11;11;11;11;11;11;11;11;11;11;11;11;11;11;11;11;11;11;11;11;11;11;11;11;11;11;11;11;11;11;11;11;11;11;11;11;11;11;11;11;11;11;11;11;11;11;11;11;11;11;11;11;11;11	62123973;62123998;62123998;62124011;62128151;62128151;62128151;62128151;62128770;62128770;62128770;62128770;62129782;62129782;62129782;62129782;62130559;62137832;62137832;62137832;62137832;62138713;62138713;62138713;62138888;62138888;62138888;62140234;62140234;62140234;62140704;62140704;62140704;62140913;62140913;62140913;62141500;62141500;62144982;62144982;62145169;62145169;62145629;62145629;621…	62124163;62124055;62124163;62124163;62128301;62128301;62128301;62128301;62128883;62128883;62128883;62128883;62130590;62130028;62130590;62130590;62130590;62137976;62137883;62137883;62137883;62138770;62138770;62138770;62139005;62139005;62139005;62140285;62140285;62140285;62140821;62140821;62140821;62141044;62141044;62141044;62141745;62141511;62145091;62145091;62145289;62145289;62145751;62145751;621…	+;+;+;+;+;+;+;+;+;+;+;+;+;+;+;+;+;+;+;+;+;+;+;+;+;+;+;+;+;+;+;+;+;+;+;+;+;+;+;+;+;+;+;+;+;+;+;+;+;+;+;+;+;+;+;+	4473	63.9113	65.0853	87.6731	83.7294	2.62598e-15	3.11547e-13	-0.392203
SAMD1	19;19;19;19;19;19;19;19;19;19;19;19	14087840;14088429;14088671;14088671;14088880;14088880;14089068;14089068;14089785;14090509;14090938;14090938	14088575;14088575;14088782;14088782;14088976;14088976;14089362;14089362;14090708;14090575;14091013;14091036	-;-;-;-;-;-;-;-;-;-;-;-	2263	15.6928	17.1395	29.6417	26.714	2.81509e-15	3.31395e-13	-0.76201
BATF3	1;1;1;1;1;1;1	212686418;212686418;212686418;212687467;212696961;212696961;212699673	212686979;212686979;212686979;212687509;212698755;212697065;212699985	-;-;-;-;-;-;-	2713	6.57006	6.29652	14.1882	12.0252	3.15819e-15	3.68925e-13	-1.00951
LILRB4	19;19;19;19;19;19;19;19;19;19;19;19;19;19;19;19;19;19;19;19;19;19;19;19;19;19;19;19;19;19;19;19;19;19;19;19;19;19;19;19;19;19;19;19;19;19;19;19;19;19;19;19;19;19;19;19;19;19;19;19;19;19;19;19;19;19;19;19;19;19;19;19;19;19;19;19;19;19;19;19;19;19;19;19;19	54643889;54643915;54648034;54662128;54662158;54662509;54662509;54662819;54662819;54662819;54662995;54662998;54663020;54663027;54663532;54663532;54663532;54663532;54663532;54663532;54663754;54663754;54663754;54663754;54663754;54663754;54663834;54664186;54664186;54664186;54664186;54664186;54664186;54664799;54664799;54664799;54664799;54664799;54664799;54665130;54665130;54665130;54665130;54665130;546…	54643966;54643966;54649600;54662188;54662188;54662547;54662547;54663067;54663067;54663067;54663067;54663067;54663067;54663067;54663567;54663567;54663567;54663567;54663567;54663567;54664038;54664038;54664038;54664038;54663955;54664038;54664038;54664485;54664485;54664485;54664485;54664485;54664485;54664849;54664849;54664849;54664849;54664849;54664849;54665180;54665180;54665180;54665180;54665180;546…	+;+;+;+;+;+;+;+;+;+;+;+;+;+;+;+;+;+;+;+;+;+;+;+;+;+;+;+;+;+;+;+;+;+;+;+;+;+;+;+;+;+;+;+;+;+;+;+;+;+;+;+;+;+;+;+;+;+;+;+;+;+;+;+;+;+;+;+;+;+;+;+;+;+;+;+;+;+;+;+;+;+;+;+;+	6328	11.5689	11.2133	7.32662	7.30246	3.97167e-15	4.60411e-13	0.657004
MCCC2	5;5;5;5;5;5;5;5;5;5;5;5;5;5;5;5;5;5;5;5;5;5;5;5;5;5;5;5;5;5;5;5;5;5;5;5;5;5;5;5;5;5;5;5;5;5;5;5;5;5;5;5;5;5;5;5;5;5;5;5;5;5;5;5;5;5;5;5;5;5;5;5;5;5;5;5;5;5;5;5;5;5;5;5;5;5;5	71587288;71587288;71587297;71587330;71592871;71592926;71592926;71592926;71592926;71596270;71596280;71596280;71596280;71596280;71596280;71599659;71599659;71599659;71599659;71599659;71599659;71602506;71602506;71602506;71602506;71602506;71602506;71602509;71604356;71604356;71604356;71604356;71604356;71604356;71604380;71626640;71626640;71626640;71626640;71626654;71632121;71632121;71632121;71632121;716…	71587554;71587554;71587554;71587554;71592992;71592992;71592992;71592992;71592992;71596364;71596364;71596364;71596364;71596364;71596364;71599760;71599760;71599760;71599760;71599760;71599760;71603065;71602633;71602633;71602633;71602633;71602633;71602633;71604468;71604468;71604468;71604468;71604468;71604468;71604468;71626753;71626753;71626753;71626753;71626753;71632185;71632185;71632185;71632185;716…	+;+;+;+;+;+;+;+;+;+;+;+;+;+;+;+;+;+;+;+;+;+;+;+;+;+;+;+;+;+;+;+;+;+;+;+;+;+;+;+;+;+;+;+;+;+;+;+;+;+;+;+;+;+;+;+;+;+;+;+;+;+;+;+;+;+;+;+;+;+;+;+;+;+;+;+;+;+;+;+;+;+;+;+;+;+;+	6034	14.0391	14.5231	20.7495	20.3104	4.35094e-15	4.97907e-13	-0.505773
PPP1R15A	19;19;19;19	48872392;48873225;48874318;48875614	48872651;48874898;48876042;48876057	+;+;+;+	3093	90.9564	92.3371	72.0086	69.3662	4.3607e-15	4.97907e-13	0.392445
TNFSF14	19;19;19;19;19;19;19;19;19	6661253;6664555;6667113;6667113;6667413;6667413;6669851;6669959;6670296	6665350;6665350;6667154;6667154;6667449;6667449;6670158;6670117;6670588	-;-;-;-;-;-;-;-;-	4778	3.54973	3.45195	6.56991	7.42819	4.47389e-15	5.07018e-13	-0.980443
ODF3B	22;22;22;22;22;22;22;22;22;22;22;22;22;22;22;22;22;22;22;22;22;22;22;22;22;22;22;22;22;22;22;22;22;22;22;22;22;22;22;22;22;22	50529710;50530409;50530409;50530426;50530441;50530480;50530539;50530638;50530712;50530712;50530712;50530712;50530712;50530712;50530937;50530937;50530937;50530937;50530937;50530937;50531191;50531191;50531191;50531191;50531191;50531191;50531191;50531191;50531570;50531570;50531570;50531570;50531570;50531745;50531969;50531969;50531969;50531969;50531969;50531969;50532477;50532477	50530560;50530560;50530560;50530560;50530560;50530560;50531058;50531058;50530852;50530852;50530852;50530852;50530852;50530828;50531058;50531058;50531058;50531058;50531058;50531058;50531295;50531295;50531423;50531341;50531295;50531295;50531295;50531822;50531679;50531773;50531773;50531773;50531702;50531773;50532111;50532077;50532147;50532108;50532111;50532184;50532580;50532579	-;-;-;-;-;-;-;-;-;-;-;-;-;-;-;-;-;-;-;-;-;-;-;-;-;-;-;-;-;-;-;-;-;-;-;-;-;-;-;-;-;-	2301	27.5671	28.5142	17.5739	17.774	5.17692e-15	5.7807e-13	0.683796
DENND3	8;8;8;8;8;8;8;8;8;8;8;8;8;8;8;8;8;8;8;8;8;8;8;8;8;8;8;8;8;8;8;8;8;8;8;8;8;8;8;8;8;8;8;8;8;8;8;8;8;8;8;8;8;8;8;8;8;8;8;8;8;8;8;8;8;8;8;8;8;8;8;8;8;8;8;8;8;8;8;8;8;8;8;8;8;8;8;8;8;8;8;8;8;8;8;8;8;8;8;8;8;8;8;8;8;8;8;8;8;8;8;8;8;8;8;8;8;8;8;8;8;8;8;8;8;8;8;8;8;8;8;8;8;8;8;8;8;8;8;8;8;8;8;8;8;8;8;8;8;8;8;8;8;8	141117278;141128612;141128621;141128621;141128638;141128649;141128675;141128779;141136509;141136509;141136509;141136509;141136509;141136509;141136558;141136558;141136626;141138022;141138022;141138022;141138022;141138022;141138022;141138022;141138022;141138022;141141203;141141203;141141203;141141203;141141203;141141203;141141203;141141203;141141203;141142300;141143914;141144148;141144148;141144148…	141117364;141128809;141128809;141128809;141128809;141128809;141128809;141128809;141136791;141136791;141136791;141136791;141136791;141136791;141136791;141136791;141136791;141138137;141138137;141138137;141138137;141138137;141138137;141138137;141138137;141138137;141141324;141141324;141141324;141141324;141141324;141141324;141141455;141142511;141141276;141143008;141144259;141144259;141144259;141144259…	+;+;+;+;+;+;+;+;+;+;+;+;+;+;+;+;+;+;+;+;+;+;+;+;+;+;+;+;+;+;+;+;+;+;+;+;+;+;+;+;+;+;+;+;+;+;+;+;+;+;+;+;+;+;+;+;+;+;+;+;+;+;+;+;+;+;+;+;+;+;+;+;+;+;+;+;+;+;+;+;+;+;+;+;+;+;+;+;+;+;+;+;+;+;+;+;+;+;+;+;+;+;+;+;+;+;+;+;+;+;+;+;+;+;+;+;+;+;+;+;+;+;+;+;+;+;+;+	14670	16.1209	17.0158	12.4997	12.8402	5.17697e-15	5.7807e-13	0.404929
APOL6	22;22;22	35648395;35656379;35658615	35648623;35656475;35668409	+;+;+	10121	10.4231	10.0464	7.08357	7.10176	5.25366e-15	5.82351e-13	0.547088
CENPE	4;4;4;4;4;4;4;4;4;4;4;4;4;4;4;4;4;4;4;4;4;4;4;4;4;4;4;4;4;4;4;4;4;4;4;4;4;4;4;4;4;4;4;4;4;4;4;4;4;4;4;4;4;4;4;4;4;4;4;4;4;4;4;4;4;4;4;4;4;4;4;4;4;4;4;4;4;4;4;4;4;4;4;4;4;4;4;4;4;4;4;4;4;4;4;4;4;4;4;4;4;4;4;4;4;4;4;4;4;4;4;4;4;4;4;4;4;4;4;4;4;4;4;4;4;4;4;4;4;4;4;4;4;4;4;4;4;4;4;4;4;4;4;4;4;4;4;4;4;4;4;4;4;4;4;4;4;4;4;4;4;4;4;4;4;4;4;4;4;4;4;4;4;4;4;4;4;4;4;4;4;4;4;4;4;4;4;4	103105806;103105813;103106047;103108803;103108803;103108803;103110828;103110828;103110828;103114455;103114455;103114455;103116364;103116577;103116577;103116577;103120148;103120148;103120148;103120148;103122871;103122871;103122871;103132693;103132693;103132693;103133695;103133695;103133695;103136141;103136141;103136141;103136280;103138351;103138351;103138351;103139789;103139789;103139943;103139953…	103106316;103106316;103106316;103109089;103109089;103109089;103111011;103111011;103111011;103114552;103114552;103114552;103116689;103116689;103116689;103116689;103120336;103120333;103120333;103120333;103123089;103123089;103123089;103132896;103132896;103132896;103133892;103133892;103133892;103136171;103136359;103136359;103136359;103138449;103138452;103138449;103139941;103140079;103139951;103139961…	-;-;-;-;-;-;-;-;-;-;-;-;-;-;-;-;-;-;-;-;-;-;-;-;-;-;-;-;-;-;-;-;-;-;-;-;-;-;-;-;-;-;-;-;-;-;-;-;-;-;-;-;-;-;-;-;-;-;-;-;-;-;-;-;-;-;-;-;-;-;-;-;-;-;-;-;-;-;-;-;-;-;-;-;-;-;-;-;-;-;-;-;-;-;-;-;-;-;-;-;-;-;-;-;-;-;-;-;-;-;-;-;-;-;-;-;-;-;-;-;-;-;-;-;-;-;-;-	9444	7.14514	7.24006	10.5704	10.7319	5.46956e-15	6.01889e-13	-0.548379
JUN	1	58780788	58784327	-	3540	6.42243	7.06553	3.29657	2.97459	5.71866e-15	6.24774e-13	1.1213
NCOA7	6;6;6;6;6;6;6;6;6;6;6;6;6;6;6;6;6;6;6;6;6;6;6;6;6;6;6;6;6;6;6;6;6;6;6;6;6;6;6;6;6;6;6;6;6;6;6;6;6;6;6;6;6;6;6;6;6;6;6;6;6;6;6;6;6;6;6;6;6;6;6;6;6;6;6;6;6;6;6;6;6;6	125781161;125786137;125790763;125790940;125790940;125790965;125796680;125810135;125815218;125815218;125815291;125815291;125815291;125815291;125815291;125815291;125855020;125855020;125855020;125855020;125855020;125855020;125855020;125874889;125874889;125874889;125874889;125874889;125878263;125878263;125878263;125878263;125881090;125881090;125881090;125881090;125882426;125882426;125882426;125885159…	125781371;125786213;125791067;125791067;125791067;125791067;125796797;125810347;125815404;125815404;125815404;125815404;125815404;125815404;125815404;125815404;125855590;125855240;125855240;125855240;125855240;125855240;125855240;125874968;125874968;125874968;125874968;125874968;125878370;125878370;125878370;125878370;125881203;125881203;125881203;125881203;125882551;125882551;125882551;125885343…	+;+;+;+;+;+;+;+;+;+;+;+;+;+;+;+;+;+;+;+;+;+;+;+;+;+;+;+;+;+;+;+;+;+;+;+;+;+;+;+;+;+;+;+;+;+;+;+;+;+;+;+;+;+;+;+;+;+;+;+;+;+;+;+;+;+;+;+;+;+;+;+;+;+;+;+;+;+;+;+;+;+	7820	12.048	12.1217	8.35809	8.25966	6.2028e-15	6.72827e-13	0.55832
RPL15	3;3;3;3;3;3;3;3;3;3;3;3;3;3;3;3;3;3;3;3;3;3;3;3;3;3;3;3;3;3;3;3;3;3;3;3;3;3;3;3;3;3;3;3;3;3;3;3	23916545;23916591;23916804;23916804;23916979;23917131;23917147;23917148;23917148;23917148;23917148;23917533;23917705;23917837;23917847;23917850;23917850;23917850;23917850;23917850;23917850;23917850;23917850;23917850;23918440;23918440;23918440;23918440;23918440;23918440;23918440;23918440;23918440;23918440;23918440;23919196;23919196;23919196;23919196;23919196;23919196;23919196;23919196;23919196;239…	23917173;23916768;23917173;23917173;23917095;23917239;23917173;23918576;23917173;23917295;23917173;23917665;23918031;23918031;23918047;23918031;23919552;23918031;23918031;23918031;23918031;23918031;23918031;23918031;23918576;23918576;23918576;23918583;23918576;23918576;23918576;23918576;23918576;23918576;23918576;23919551;23920847;23919791;23919551;23919547;23919409;23920820;23920856;23919286;239…	+;+;+;+;+;+;+;+;+;+;+;+;+;+;+;+;+;+;+;+;+;+;+;+;+;+;+;+;+;+;+;+;+;+;+;+;+;+;+;+;+;+;+;+;+;+;+;+	6528	51.1895	49.1639	38.2892	39.2391	6.9669e-15	7.5035e-13	0.390428
TNFSF13	17;17;17;17;17;17;17;17;17;17;17;17;17;17;17;17;17;17;17;17;17;17;17;17;17;17;17;17;17;17;17;17;17;17;17;17;17;17;17;17;17;17;17;17;17;17;17;17;17;17	7558292;7558292;7558293;7558300;7558302;7558476;7558597;7558759;7558787;7559068;7559068;7559068;7559624;7559624;7559624;7559624;7559624;7559846;7559846;7559846;7559846;7559848;7559851;7559851;7560049;7560049;7560049;7560049;7560049;7560049;7560049;7560049;7560049;7560350;7560350;7560350;7560350;7560350;7560350;7560350;7560350;7560350;7560724;7560724;7560724;7560724;7560724;7560724;7560724;7560999	7559297;7558375;7558375;7558375;7558375;7559297;7559297;7559297;7559297;7559297;7559297;7559297;7559702;7559702;7559702;7559702;7559702;7559893;7559893;7559893;7559893;7559893;7559893;7559893;7560167;7560167;7560167;7560167;7560167;7560167;7560167;7560167;7560167;7560488;7560488;7560488;7560488;7560372;7560394;7560488;7560488;7560488;7560817;7561608;7560838;7561600;7560835;7561292;7561608;7561601	+;+;+;+;+;+;+;+;+;+;+;+;+;+;+;+;+;+;+;+;+;+;+;+;+;+;+;+;+;+;+;+;+;+;+;+;+;+;+;+;+;+;+;+;+;+;+;+;+;+	2276	24.034	23.472	14.2095	14.5819	8.00159e-15	8.55719e-13	0.740549
RAD21	8;8;8;8;8;8;8;8;8;8;8;8;8;8;8;8;8;8;8;8;8;8;8;8;8;8;8;8;8;8;8;8;8;8;8;8;8;8;8;8;8;8;8;8;8;8;8;8;8;8;8;8	116845935;116846905;116847227;116847334;116848946;116848946;116848946;116848946;116850618;116850618;116850618;116851948;116851948;116852549;116854245;116856166;116856646;116857267;116857271;116857279;116857289;116858352;116858352;116858352;116858352;116861841;116861841;116861841;116861841;116861843;116861854;116863117;116863130;116863130;116863130;116863130;116863130;116863130;116866586;116866586…	116847691;116847691;116847691;116847691;116849029;116849029;116849483;116849029;116850767;116852252;116850767;116852251;116852096;116852708;116854468;116856288;116856771;116857473;116857473;116857473;116857473;116858458;116858458;116858458;116858458;116861940;116861940;116861940;116861940;116861940;116861940;116863259;116863259;116863259;116863259;116863259;116863259;116863259;116866761;116866761…	-;-;-;-;-;-;-;-;-;-;-;-;-;-;-;-;-;-;-;-;-;-;-;-;-;-;-;-;-;-;-;-;-;-;-;-;-;-;-;-;-;-;-;-;-;-;-;-;-;-;-;-	6192	75.2487	76.0608	96.7609	98.209	8.41861e-15	8.94021e-13	-0.347792
MIR142	17;17	58330884;58331232	58332508;58331318	-;-	1625	67.6886	66.7265	96.1146	91.5304	8.68597e-15	9.16008e-13	-0.463479
ERLIN1	10;10;10;10;10;10;10;10;10;10;10;10;10;10;10;10;10;10;10;10;10;10;10;10;10;10;10;10;10;10;10;10;10;10	100150094;100151808;100154860;100154860;100154860;100156145;100156145;100156145;100164004;100164004;100164004;100167348;100167348;100167348;100174208;100174208;100174208;100175945;100175945;100175945;100178133;100178133;100178133;100179201;100179201;100179201;100183756;100183756;100183756;100185514;100185514;100185514;100185904;100185962	100152352;100152352;100154939;100154939;100154939;100156234;100156234;100156234;100164095;100164095;100164095;100167406;100167406;100167406;100174281;100174281;100174281;100176070;100176070;100176070;100178194;100178194;100178194;100179247;100179247;100179247;100183837;100183837;100183837;100185637;100185637;100188334;100186029;100186033	-;-;-;-;-;-;-;-;-;-;-;-;-;-;-;-;-;-;-;-;-;-;-;-;-;-;-;-;-;-;-;-;-;-	5792	36.4269	37.3789	28.6605	28.0415	8.95861e-15	9.38245e-13	0.398147
H3F3B	17;17;17;17;17;17;17;17;17;17;17;17;17;17;17;17;17;17;17;17;17;17;17;17;17;17;17;17;17;17;17;17;17;17;17;17;17;17;17;17;17	75776434;75778020;75778072;75778250;75778325;75778453;75778567;75778574;75778576;75778610;75778638;75778647;75778810;75778810;75778810;75778810;75778810;75778810;75778810;75778821;75778883;75779047;75779047;75779047;75779047;75779047;75779047;75779047;75779047;75779542;75779647;75779657;75779657;75779657;75779657;75779657;75779657;75779662;75783107;75784521;75785376	75778723;75778723;75779772;75778723;75778723;75779184;75778723;75778723;75778723;75778723;75778963;75778723;75779184;75778963;75778963;75778963;75778963;75778882;75778963;75778963;75778963;75779184;75779184;75779184;75779184;75779184;75779286;75779184;75779184;75779603;75779780;75779778;75779779;75779766;75779759;75779779;75779758;75779778;75785893;75784607;75785486	-;-;-;-;-;-;-;-;-;-;-;-;-;-;-;-;-;-;-;-;-;-;-;-;-;-;-;-;-;-;-;-;-;-;-;-;-;-;-;-;-	6134	38.3544	37.0382	28.5742	29.3213	9.52987e-15	9.91237e-13	0.399105
SUDS3	12;12;12;12;12;12;12;12;12;12;12;12;12;12;12;12;12;12;12;12;12;12;12	118376380;118380162;118384012;118386114;118389927;118391126;118400659;118401759;118401772;118401983;118402233;118403412;118403412;118403412;118403501;118404056;118411073;118411073;118411073;118411073;118414335;118414335;118414335	118376833;118380231;118384067;118386185;118389946;118391282;118400754;118401820;118401820;118402004;118402648;118403517;118403517;118403517;118403517;118404473;118411147;118411157;118411157;118411157;118414655;118418031;118414386	+;+;+;+;+;+;+;+;+;+;+;+;+;+;+;+;+;+;+;+;+;+;+	5731	22.1681	23.4662	31.6964	30.7844	9.77276e-15	1.00959e-12	-0.435525
DOCK2	5;5;5;5;5;5;5;5;5;5;5;5;5;5;5;5;5;5;5;5;5;5;5;5;5;5;5;5;5;5;5;5;5;5;5;5;5;5;5;5;5;5;5;5;5;5;5;5;5;5;5;5;5;5;5;5;5;5;5;5;5;5;5;5;5;5;5;5;5;5;5;5;5;5;5;5;5;5;5;5;5;5;5;5;5;5;5;5;5;5;5;5;5;5;5;5;5;5;5;5;5;5;5;5;5;5;5;5;5;5;5;5;5;5;5;5;5;5;5;5;5;5;5;5;5;5;5;5;5;5;5;5;5;5;5;5;5;5;5;5;5;5;5;5;5;5;5;5;5;5;5;5;5;5;5;5;5;5;5;5;5;5;5;5;5;5;5;5;5;5;5;5;5;5;5;5;5;5;5;5;5;5;5;5;5;5;5;5;5;5;5;5;5;5;5;5;5;5;5;5…	169637247;169637286;169637291;169654403;169654403;169654403;169669288;169669288;169669288;169670542;169670542;169670542;169671078;169671078;169671078;169674297;169674297;169674297;169681730;169681744;169681744;169684196;169684196;169689252;169689252;169695179;169695286;169695803;169695803;169695803;169695803;169695849;169698374;169698374;169698374;169698374;169698374;169699382;169699382;169699382…	169637369;169637369;169637369;169654486;169654486;169654486;169669328;169669328;169669328;169670597;169670597;169670597;169671174;169671174;169671174;169674445;169674445;169674445;169681865;169681879;169681879;169684350;169684350;169689333;169689333;169695216;169695364;169695938;169695938;169695938;169695938;169695938;169698449;169698449;169698449;169698449;169698449;169699458;169699458;169699458…	+;+;+;+;+;+;+;+;+;+;+;+;+;+;+;+;+;+;+;+;+;+;+;+;+;+;+;+;+;+;+;+;+;+;+;+;+;+;+;+;+;+;+;+;+;+;+;+;+;+;+;+;+;+;+;+;+;+;+;+;+;+;+;+;+;+;+;+;+;+;+;+;+;+;+;+;+;+;+;+;+;+;+;+;+;+;+;+;+;+;+;+;+;+;+;+;+;+;+;+;+;+;+;+;+;+;+;+;+;+;+;+;+;+;+;+;+;+;+;+;+;+;+;+;+;+;+;+	12890	12.4489	11.7831	16.2927	16.4769	1.02442e-14	1.05114e-12	-0.417311
PLA2G4A	1;1;1;1;1;1;1;1;1;1;1;1;1;1;1;1;1;1;1;1;1;1;1;1;1	186828953;186854286;186854286;186870435;186870435;186893011;186893011;186894098;186894098;186906965;186906965;186911248;186911248;186932763;186939008;186939008;186939980;186946637;186946869;186950657;186956102;186965409;186977593;186979315;186988377	186829035;186854387;186854387;186870516;186870516;186893159;186893159;186894211;186894211;186907002;186907002;186911389;186911389;186932899;186939230;186939230;186940094;186946774;186946961;186950728;186956344;186965593;186977788;186979472;186988981	+;+;+;+;+;+;+;+;+;+;+;+;+;+;+;+;+;+;+;+;+;+;+;+;+	2875	5.26671	5.87868	10.4309	12.0507	1.06575e-14	1.08621e-12	-0.993151
ETS2	21;21;21;21;21;21;21;21;21;21;21;21;21;21;21;21;21;21;21;21;21;21;21;21;21;21;21;21;21;21;21;21;21;21	38805307;38805831;38805951;38805971;38806451;38809636;38810035;38810035;38810035;38810035;38813003;38813003;38813003;38813003;38814273;38814273;38814273;38814273;38814781;38814781;38814781;38814781;38817008;38817008;38817008;38818425;38818425;38818425;38819503;38819503;38821586;38821586;38822674;38822674	38805616;38806120;38806120;38806120;38806808;38809796;38810106;38810106;38810106;38810106;38813114;38813114;38813114;38813114;38814392;38814392;38814392;38814392;38814981;38814981;38814981;38814981;38817091;38817091;38817091;38818646;38818646;38818646;38819766;38819766;38821704;38821704;38824955;38824955	+;+;+;+;+;+;+;+;+;+;+;+;+;+;+;+;+;+;+;+;+;+;+;+;+;+;+;+;+;+;+;+;+;+	4595	7.35252	8.24384	14.4605	12.8495	1.10655e-14	1.12027e-12	-0.790873
CEP70	3;3;3;3;3;3;3;3;3;3;3;3;3;3;3;3;3;3;3;3;3;3;3;3;3;3;3;3;3;3;3;3;3;3;3;3;3;3;3;3;3;3;3;3;3;3;3;3;3;3;3;3;3;3;3;3;3;3;3;3;3;3;3;3;3;3;3;3;3;3;3;3;3;3;3;3;3;3;3;3;3;3;3;3;3;3;3;3;3;3;3;3;3;3;3;3;3;3;3;3;3;3;3;3;3;3;3;3;3;3;3;3;3;3;3;3;3;3;3;3;3;3;3;3;3;3;3;3;3;3;3;3;3	138494344;138494758;138495003;138495013;138496910;138498031;138498031;138498031;138498031;138498031;138499884;138500110;138500110;138500110;138500110;138500110;138500399;138500399;138500399;138500399;138500399;138500735;138500735;138500735;138500735;138500735;138505295;138505295;138505295;138505295;138505295;138508439;138508439;138508439;138508439;138508439;138525490;138525490;138525490;138525490…	138495076;138495076;138495076;138495076;138497327;138498110;138498110;138498110;138498110;138498110;138500224;138500180;138500224;138500224;138500224;138500224;138500567;138500567;138500567;138500567;138500567;138500881;138500881;138500881;138500881;138500881;138505465;138505465;138505465;138505465;138505465;138508544;138508544;138508544;138508544;138508544;138525564;138525564;138525564;138525564…	-;-;-;-;-;-;-;-;-;-;-;-;-;-;-;-;-;-;-;-;-;-;-;-;-;-;-;-;-;-;-;-;-;-;-;-;-;-;-;-;-;-;-;-;-;-;-;-;-;-;-;-;-;-;-;-;-;-;-;-;-;-;-;-;-;-;-;-;-;-;-;-;-;-;-;-;-;-;-;-;-;-;-;-;-;-;-;-;-;-;-;-;-;-;-;-;-;-;-;-;-;-;-;-;-;-;-;-;-;-;-;-;-;-;-;-;-;-;-;-;-;-;-;-;-;-;-;-	4420	19.9887	20.2979	14.1427	13.0817	1.13818e-14	1.14466e-12	0.582831
COL6A3	2;2;2;2;2;2;2;2;2;2;2;2;2;2;2;2;2;2;2;2;2;2;2;2;2;2;2;2;2;2;2;2;2;2;2;2;2;2;2;2;2;2;2;2;2;2;2;2;2;2;2;2;2;2;2;2;2;2;2;2;2;2;2;2;2;2;2;2;2;2;2;2;2;2;2;2;2;2;2;2;2;2;2;2;2;2;2;2;2;2;2;2;2;2;2;2;2;2;2;2;2;2;2;2;2;2;2;2;2;2;2;2;2;2;2;2;2;2;2;2;2;2;2;2;2;2;2;2;2;2;2;2;2;2;2;2;2;2;2;2;2;2;2;2;2;2;2;2;2;2;2;2;2;2;2;2;2;2;2;2;2;2;2;2;2;2;2;2;2;2;2;2;2;2;2;2;2;2;2;2;2;2;2;2;2;2;2;2;2;2;2;2;2;2;2;2;2;2;2;2…	237324003;237324012;237324012;237324019;237324085;237324085;237324774;237325560;237325560;237325560;237325560;237325560;237325560;237325560;237332968;237333450;237333450;237333450;237333450;237333450;237333450;237334626;237334626;237334626;237334626;237334626;237334626;237334626;237336135;237336135;237336135;237336135;237336135;237336135;237338940;237339015;237339015;237339015;237339015;237339015…	237324814;237324814;237324814;237324814;237324814;237324814;237324814;237325724;237325724;237325724;237325724;237325724;237330180;237325724;237333548;237333548;237333548;237333548;237333548;237333548;237333548;237334786;237334889;237334889;237334889;237334889;237334889;237334889;237336532;237336532;237336532;237336532;237336532;237336532;237339117;237339117;237339117;237339117;237339117;237339117…	-;-;-;-;-;-;-;-;-;-;-;-;-;-;-;-;-;-;-;-;-;-;-;-;-;-;-;-;-;-;-;-;-;-;-;-;-;-;-;-;-;-;-;-;-;-;-;-;-;-;-;-;-;-;-;-;-;-;-;-;-;-;-;-;-;-;-;-;-;-;-;-;-;-;-;-;-;-;-;-;-;-;-;-;-;-;-;-;-;-;-;-;-;-;-;-;-;-;-;-;-;-;-;-;-;-;-;-;-;-;-;-;-;-;-;-;-;-;-;-;-;-;-;-;-;-;-;-	19633	9.02561	8.97323	6.79644	6.82881	1.18036e-14	1.17332e-12	0.419605
TYMSOS	18;18;18;18	641320;649620;657842;657842	641451;649964;658340;658269	-;-;-;-	976	3.86688	4.54973	12.513	14.4495	1.18212e-14	1.17332e-12	-1.65922
CERKL	2;2;2;2;2;2;2;2;2;2;2;2;2;2;2;2;2;2;2;2;2;2;2;2;2;2;2;2;2;2;2;2;2;2;2;2;2;2;2;2;2;2;2;2;2;2;2;2;2;2;2;2;2;2;2;2;2;2;2;2;2;2;2;2;2;2;2;2;2;2;2;2;2;2;2;2;2;2;2;2;2;2;2;2;2;2;2;2;2;2;2;2;2;2;2;2;2;2;2;2;2;2;2;2;2;2;2;2;2;2;2;2;2;2;2;2;2;2;2;2;2;2;2;2;2;2;2;2;2;2;2	181536676;181537405;181538114;181538184;181538184;181538184;181538184;181538184;181538184;181539092;181539092;181539092;181539092;181539092;181539092;181539092;181539092;181539092;181544700;181544700;181544700;181544700;181544700;181544700;181544700;181544700;181544700;181544728;181547618;181547618;181547618;181547618;181547618;181547618;181547618;181547618;181547618;181547618;181547822;181547822…	181538244;181538244;181538244;181538244;181538244;181538244;181538244;181538244;181538244;181539264;181539264;181539264;181539264;181539264;181539264;181539264;181539264;181539264;181544796;181544796;181544796;181544796;181544796;181544796;181544796;181544796;181544796;181544796;181547726;181547726;181548604;181547726;181547726;181547726;181547726;181547726;181547726;181547726;181547847;181547847…	-;-;-;-;-;-;-;-;-;-;-;-;-;-;-;-;-;-;-;-;-;-;-;-;-;-;-;-;-;-;-;-;-;-;-;-;-;-;-;-;-;-;-;-;-;-;-;-;-;-;-;-;-;-;-;-;-;-;-;-;-;-;-;-;-;-;-;-;-;-;-;-;-;-;-;-;-;-;-;-;-;-;-;-;-;-;-;-;-;-;-;-;-;-;-;-;-;-;-;-;-;-;-;-;-;-;-;-;-;-;-;-;-;-;-;-;-;-;-;-;-;-;-;-;-;-;-;-	4765	5.64926	5.57242	2.74335	2.94979	1.27336e-14	1.2509e-12	0.99736
GOLGA8Q	15;15;15;15;15;15;15;15;15;15;15;15;15;15;15;15;15;15;15;15;15;15	30552078;30553792;30554801;30555042;30555974;30556275;30556411;30556591;30557751;30557944;30558247;30558247;30558711;30558711;30559223;30559223;30560536;30561043;30561709;30561892;30562085;30562326	30552125;30553911;30554860;30555122;30556012;30556322;30556495;30556700;30557837;30558051;30558334;30558334;30558967;30558967;30559529;30559291;30560611;30561134;30561809;30561989;30562240;30562501	+;+;+;+;+;+;+;+;+;+;+;+;+;+;+;+;+;+;+;+;+;+	2137	115.454	120.859	154.492	155.326	1.27677e-14	1.2509e-12	-0.372854
RAB13	1;1;1;1;1;1;1;1;1;1;1;1;1;1;1;1;1;1;1;1;1;1;1;1;1;1;1;1;1;1;1;1	153981617;153981651;153981654;153982061;153982391;153982391;153982391;153982535;153982535;153982535;153982719;153982719;153982719;153982745;153983219;153983219;153983219;153983219;153983521;153983521;153983521;153983521;153984721;153984721;153984721;153984721;153984721;153984984;153984984;153986017;153986113;153986113	153982176;153982176;153983581;153982176;153982444;153982444;153982444;153982600;153982600;153982600;153982808;153982808;153982808;153982808;153983296;153983296;153983296;153983296;153983581;153983581;153983581;153983581;153984781;153984781;153984781;153984781;153984781;153985362;153985366;153986358;153986246;153986352	-;-;-;-;-;-;-;-;-;-;-;-;-;-;-;-;-;-;-;-;-;-;-;-;-;-;-;-;-;-;-;-	2751	99.2557	100.687	79.563	74.0082	1.33693e-14	1.30145e-12	0.398387
HSPH1	13;13;13;13;13;13;13;13;13;13;13;13;13;13;13;13;13;13;13;13;13;13;13;13;13;13;13;13;13;13;13;13;13;13;13;13;13;13;13;13;13;13;13;13;13;13;13;13;13;13;13;13;13;13;13;13;13;13;13;13;13;13;13;13;13;13;13;13;13;13;13;13;13;13;13;13;13;13;13;13;13;13;13;13;13;13;13;13;13;13;13;13;13;13;13;13;13;13;13;13;13;13;13;13;13;13;13	31134974;31135049;31136625;31136625;31136628;31136628;31136973;31137368;31138407;31138407;31138407;31138407;31138407;31138407;31138407;31138539;31138781;31138781;31138781;31138781;31138781;31138781;31138781;31139000;31139000;31139000;31139000;31139000;31139000;31139000;31140184;31140184;31140184;31140184;31140184;31140184;31141122;31141122;31141122;31141122;31141122;31143792;31143792;31143792;311…	31137524;31137524;31137524;31137117;31137524;31137524;31137524;31137524;31138568;31138568;31138568;31138568;31138568;31138568;31138568;31138568;31138900;31138900;31138900;31138900;31138900;31138900;31138900;31139182;31139107;31139107;31139107;31139107;31139107;31139107;31141259;31140309;31140309;31140309;31140309;31140309;31141259;31141259;31141259;31141259;31141259;31143923;31143923;31143923;311…	-;-;-;-;-;-;-;-;-;-;-;-;-;-;-;-;-;-;-;-;-;-;-;-;-;-;-;-;-;-;-;-;-;-;-;-;-;-;-;-;-;-;-;-;-;-;-;-;-;-;-;-;-;-;-;-;-;-;-;-;-;-;-;-;-;-;-;-;-;-;-;-;-;-;-;-;-;-;-;-;-;-;-;-;-;-;-;-;-;-;-;-;-;-;-;-;-;-;-;-;-;-;-;-;-;-;-	8390	24.5131	24.7242	32.1692	32.4301	1.35072e-14	1.3065e-12	-0.373794
RAB8A	19;19;19;19;19;19;19;19;19;19;19;19;19;19;19;19;19;19;19;19;19;19;19;19;19;19;19;19;19;19;19;19;19	16111629;16111892;16111895;16111897;16111897;16111915;16112369;16118226;16118226;16118226;16118226;16118226;16121750;16121750;16121750;16121750;16121750;16125470;16125470;16125470;16125470;16127437;16127437;16127437;16127951;16128026;16128026;16129554;16129554;16129574;16132212;16132212;16132212	16112025;16112025;16112025;16112025;16112025;16112025;16112757;16118286;16118286;16118286;16118286;16118286;16121810;16121810;16121810;16122132;16121810;16126990;16125547;16125547;16125547;16127526;16127661;16127526;16128091;16128091;16128091;16129604;16129604;16129604;16132319;16133010;16134234	+;+;+;+;+;+;+;+;+;+;+;+;+;+;+;+;+;+;+;+;+;+;+;+;+;+;+;+;+;+;+;+;+	5191	40.3553	39.6465	31.0289	30.5274	1.56306e-14	1.50232e-12	0.396061
SLC22A23	6;6;6;6;6;6;6;6;6;6;6;6;6;6;6;6;6;6;6;6;6;6;6;6;6;6;6;6;6;6;6;6;6;6;6;6;6;6;6;6;6;6;6;6;6;6;6;6;6;6;6;6;6;6;6;6;6;6;6;6;6;6;6;6;6;6;6;6;6;6;6;6;6;6;6;6;6;6;6;6;6;6;6;6;6;6;6;6;6;6;6	3268962;3269458;3271774;3271774;3272829;3272830;3273356;3276681;3283465;3283852;3283852;3283852;3283852;3283852;3283852;3283874;3284936;3285079;3285079;3285079;3285079;3285079;3285079;3285079;3286859;3286859;3286859;3286859;3286859;3286859;3286859;3286984;3289764;3289764;3289764;3289764;3289764;3289764;3289764;3289764;3289766;3298091;3298091;3298091;3298091;3298091;3298091;3298091;3298091;3298091…	3273412;3273412;3273412;3272491;3273412;3273412;3273412;3276976;3283975;3284120;3283975;3283975;3283975;3283975;3283975;3283975;3284959;3285111;3285111;3285111;3285111;3285111;3285111;3285111;3287091;3287091;3287091;3287091;3287091;3287091;3287091;3287091;3289866;3289866;3289866;3289866;3289866;3289866;3289866;3289866;3289866;3298218;3298218;3298218;3298218;3298218;3298218;3298218;3298218;3298218…	-;-;-;-;-;-;-;-;-;-;-;-;-;-;-;-;-;-;-;-;-;-;-;-;-;-;-;-;-;-;-;-;-;-;-;-;-;-;-;-;-;-;-;-;-;-;-;-;-;-;-;-;-;-;-;-;-;-;-;-;-;-;-;-;-;-;-;-;-;-;-;-;-;-;-;-;-;-;-;-;-;-;-;-;-;-;-;-;-;-;-	8898	1.61994	1.7263	0.671008	0.554727	1.65316e-14	1.57893e-12	1.4638
RP1-261G23.7	6	43770429	43770616	-	188	807.833	863.571	609.911	629.372	2.01777e-14	1.91511e-12	0.449494
STAT2	12;12;12;12;12;12;12;12;12;12;12;12;12;12;12;12;12;12;12;12;12;12;12;12;12;12;12;12;12;12;12;12;12;12;12;12;12;12;12;12;12;12;12;12;12;12;12;12;12;12;12;12;12;12;12;12;12;12;12;12;12;12;12;12;12;12;12;12;12;12;12;12;12;12;12;12;12;12;12;12;12;12;12;12;12;12;12;12;12;12;12;12;12;12;12;12;12;12;12;12;12;12;12;12;12;12;12;12;12;12;12;12;12;12	56341597;56342710;56342936;56343825;56343825;56343825;56344085;56346146;56346146;56346146;56346146;56346442;56346442;56346442;56346442;56346678;56346819;56346819;56346819;56348529;56348529;56348529;56348529;56348752;56348752;56348752;56348924;56348924;56348924;56348998;56349163;56349163;56349163;56349345;56349426;56349426;56349426;56349501;56349589;56349589;56349589;56349589;56349589;56349860;563…	56343531;56343531;56343531;56344135;56344135;56344135;56344135;56346203;56346203;56346203;56346203;56346868;56346624;56346624;56346624;56346955;56346955;56346955;56346955;56348912;56348623;56348623;56348623;56348804;56348804;56348804;56349059;56349059;56349059;56349059;56349261;56349261;56349261;56349509;56349509;56349509;56349509;56349509;56349636;56349636;56349636;56349636;56349775;56350432;563…	-;-;-;-;-;-;-;-;-;-;-;-;-;-;-;-;-;-;-;-;-;-;-;-;-;-;-;-;-;-;-;-;-;-;-;-;-;-;-;-;-;-;-;-;-;-;-;-;-;-;-;-;-;-;-;-;-;-;-;-;-;-;-;-;-;-;-;-;-;-;-;-;-;-;-;-;-;-;-;-;-;-;-;-;-;-;-;-;-;-;-;-;-;-;-;-;-;-;-;-;-;-;-;-;-;-;-;-;-;-;-;-;-;-	6109	7.10831	7.2095	4.2722	4.13994	2.09505e-14	1.97611e-12	0.784834
CLNS1A	11;11;11;11;11;11;11;11;11;11;11;11;11;11;11;11;11;11;11;11;11;11;11;11;11;11;11;11;11;11;11;11;11;11;11;11;11;11;11;11;11;11;11;11;11;11;11;11;11;11;11;11;11;11	77514936;77529948;77585362;77611315;77612231;77612298;77612960;77614530;77616195;77616195;77616250;77616404;77618533;77619484;77619606;77619606;77619606;77619606;77619606;77619606;77619606;77619606;77621866;77622460;77622500;77622500;77622500;77622500;77622500;77622500;77622500;77622643;77624963;77624963;77624963;77624963;77624963;77624963;77624963;77625717;77625717;77625717;77625717;77629763;776…	77514962;77530014;77585459;77611374;77612517;77612370;77613041;77616695;77616695;77616695;77616695;77616695;77618687;77619695;77619695;77619695;77619695;77619695;77619695;77619695;77619695;77619695;77622044;77622673;77622674;77622673;77622673;77622673;77622531;77622673;77622673;77622673;77625551;77625031;77625070;77625070;77625070;77625070;77625070;77625818;77625818;77625818;77625818;77629899;776…	-;-;-;-;-;-;-;-;-;-;-;-;-;-;-;-;-;-;-;-;-;-;-;-;-;-;-;-;-;-;-;-;-;-;-;-;-;-;-;-;-;-;-;-;-;-;-;-;-;-;-;-;-;-	4592	28.4391	28.4283	37.8641	38.891	2.39965e-14	2.24945e-12	-0.414593
RP11-468E2.4	14;14;14;14;14;14;14;14;14;14;14;14;14;14;14;14;14;14;14;14;14	24151218;24151485;24151786;24155157;24155414;24155603;24157290;24157520;24157898;24158142;24159864;24160239;24160520;24162144;24162966;24163378;24163878;24164063;24164614;24165847;24166122	24151379;24151670;24151992;24155330;24155512;24155692;24157404;24157638;24158011;24158199;24159960;24160407;24161338;24162324;24163149;24163508;24163959;24164134;24164955;24165962;24167402	+;+;+;+;+;+;+;+;+;+;+;+;+;+;+;+;+;+;+;+;+	4798	9.42965	11.2193	5.87319	5.37891	2.67089e-14	2.48835e-12	0.892757
PKM	15;15;15;15;15;15;15;15;15;15;15;15;15;15;15;15;15;15;15;15;15;15;15;15;15;15;15;15;15;15;15;15;15;15;15;15;15;15;15;15;15;15;15;15;15;15;15;15;15;15;15;15;15;15;15;15;15;15;15;15;15;15;15;15;15;15;15;15;15;15;15;15;15;15;15;15;15;15;15;15;15;15;15;15;15;15;15;15;15;15;15;15;15;15;15;15;15;15;15;15;15;15;15;15;15;15;15;15;15;15;15;15;15;15;15;15;15;15;15;15;15;15;15;15;15;15;15;15;15;15;15;15;15;…	72199029;72199029;72199029;72199029;72199032;72199032;72199032;72199036;72199105;72199590;72199629;72200474;72200474;72200474;72200474;72200474;72200474;72200474;72200474;72200474;72200474;72200474;72200508;72201867;72202454;72202454;72202454;72202454;72202454;72202533;72202690;72203022;72203022;72203022;72203022;72203022;72203022;72206259;72206675;72206728;72206728;72206728;72206728;72206728;722…	72199756;72199756;72199756;72199756;72199756;72199756;72199756;72199756;72199756;72199756;72199756;72200655;72200655;72202053;72200655;72200655;72200655;72200655;72200655;72200655;72200655;72200655;72200655;72202620;72202620;72202620;72202620;72204559;72202620;72202620;72203188;72203188;72203188;72203188;72203188;72203188;72203188;72206880;72206880;72206854;72206798;72206880;72206880;72206880;722…	-;-;-;-;-;-;-;-;-;-;-;-;-;-;-;-;-;-;-;-;-;-;-;-;-;-;-;-;-;-;-;-;-;-;-;-;-;-;-;-;-;-;-;-;-;-;-;-;-;-;-;-;-;-;-;-;-;-;-;-;-;-;-;-;-;-;-;-;-;-;-;-;-;-;-;-;-;-;-;-;-;-;-;-;-;-;-;-;-;-;-;-;-;-;-;-;-;-;-;-;-;-;-;-;-;-;-;-;-;-;-;-;-;-;-;-;-;-;-;-;-;-;-;-;-;-;-;-	8571	82.6868	80.7794	105.441	102.821	2.74355e-14	2.54046e-12	-0.331376
MTHFD2	2;2;2;2;2;2;2;2;2;2;2;2;2;2;2;2;2;2;2;2;2;2;2;2;2;2;2;2;2;2;2;2;2;2;2;2;2;2;2;2;2;2;2	74198562;74198610;74198613;74198615;74198615;74198616;74198629;74205705;74205705;74205705;74205705;74205705;74205982;74206394;74207704;74207704;74207704;74207704;74208569;74208569;74208569;74208569;74208569;74208569;74209942;74209942;74209942;74209942;74209942;74211199;74211199;74211199;74211199;74211199;74211741;74211741;74211741;74211741;74214079;74214079;74214079;74214079;74214079	74198742;74198742;74198742;74198742;74198742;74198742;74198742;74206073;74205889;74205889;74205889;74205889;74206088;74206606;74207826;74207826;74207826;74207826;74208721;74208721;74208721;74208721;74208721;74208721;74210051;74210049;74210049;74210049;74210049;74211291;74211291;74211291;74211291;74211291;74211866;74211866;74211866;74211866;74215277;74214605;74214741;74215298;74217565	+;+;+;+;+;+;+;+;+;+;+;+;+;+;+;+;+;+;+;+;+;+;+;+;+;+;+;+;+;+;+;+;+;+;+;+;+;+;+;+;+;+;+	4870	35.9752	34.5745	26.7956	26.5355	2.98303e-14	2.74547e-12	0.421662
EPB41L2	6;6;6;6;6;6;6;6;6;6;6;6;6;6;6;6;6;6;6;6;6;6;6;6;6;6;6;6;6;6;6;6;6;6;6;6;6;6;6;6;6;6;6;6;6;6;6;6;6;6;6;6;6;6;6;6;6;6;6;6;6;6;6;6;6;6;6;6;6;6;6;6;6;6;6;6;6;6;6;6;6;6;6;6;6;6;6;6;6;6;6;6;6;6;6;6;6;6;6;6;6;6;6;6;6;6;6;6;6;6;6;6;6;6;6;6;6;6;6;6;6;6;6;6;6;6;6;6;6;6;6;6;6;6;6;6;6;6;6;6;6;6;6;6;6;6;6;6;6;6;6;6;6;6;6;6;6;6;6;6;6;6;6;6;6;6;6;6;6;6;6;6;6;6;6;6;6;6;6;6;6;6;6;6;6;6;6;6;6;6;6;6;6;6;6;6;6;6;6;6…	130839347;130839347;130839347;130839347;130839347;130839347;130839347;130839350;130839350;130839352;130839353;130840135;130840182;130840373;130840376;130858131;130858131;130858131;130858131;130858131;130858131;130858131;130858131;130858131;130858131;130858131;130858131;130858131;130858131;130858136;130858136;130858136;130858136;130858225;130863638;130863638;130863638;130863638;130863638;130863638…	130840598;130840598;130840598;130840598;130840598;130840598;130840598;130840598;130840598;130840598;130840594;130840598;130840598;130840598;130840598;130858328;130858243;130858243;130858243;130858243;130858243;130858243;130858243;130858243;130858243;130858243;130858243;130858243;130858243;130858243;130858243;130858243;130858243;130858243;130863718;130863718;130863718;130863718;130863718;130863718…	-;-;-;-;-;-;-;-;-;-;-;-;-;-;-;-;-;-;-;-;-;-;-;-;-;-;-;-;-;-;-;-;-;-;-;-;-;-;-;-;-;-;-;-;-;-;-;-;-;-;-;-;-;-;-;-;-;-;-;-;-;-;-;-;-;-;-;-;-;-;-;-;-;-;-;-;-;-;-;-;-;-;-;-;-;-;-;-;-;-;-;-;-;-;-;-;-;-;-;-;-;-;-;-;-;-;-;-;-;-;-;-;-;-;-;-;-;-;-;-;-;-;-;-;-;-;-;-	10247	45.3377	45.1126	58.3642	57.1982	3.17395e-14	2.90359e-12	-0.335505
HIPK2	7;7;7;7;7;7;7;7;7;7;7;7;7;7;7;7;7;7;7;7;7;7;7;7;7;7;7;7;7;7;7;7;7;7;7;7;7;7;7;7;7	139561570;139572629;139575128;139575128;139583524;139583817;139583817;139596717;139596717;139600417;139600417;139600435;139604081;139604081;139604081;139613202;139613202;139613202;139614286;139614286;139614286;139620401;139620401;139620401;139626601;139626601;139626601;139628953;139628953;139628953;139631165;139631165;139631165;139631602;139631602;139631602;139715932;139715932;139715932;139777605…	139573397;139573397;139575288;139575288;139584064;139584064;139584064;139596998;139596998;139600596;139600596;139600596;139604223;139604223;139604223;139613323;139613323;139613323;139614493;139614412;139614493;139620563;139620563;139620563;139626785;139626785;139626785;139629039;139629039;139629039;139631284;139631284;139631284;139631725;139631725;139631725;139717013;139717015;139717015;139777778…	-;-;-;-;-;-;-;-;-;-;-;-;-;-;-;-;-;-;-;-;-;-;-;-;-;-;-;-;-;-;-;-;-;-;-;-;-;-;-;-;-	15402	2.35296	2.30941	3.78549	3.7694	3.19503e-14	2.90537e-12	-0.678304
RASSF3	12;12;12;12;12;12;12;12;12;12;12;12;12;12;12;12;12;12;12;12;12;12;12;12;12	64507001;64533268;64541581;64541581;64610513;64610513;64610513;64610522;64610619;64611438;64684787;64684787;64684787;64684787;64688216;64688216;64688216;64691470;64691470;64691470;64691470;64694763;64694763;64694763;64694763	64507329;64533334;64541705;64541705;64610743;64610541;64610743;64610743;64610743;64611650;64684894;64684894;64684894;64684894;64688453;64688453;64688453;64691579;64691579;64691579;64691579;64695412;64697567;64695182;64694912	+;+;+;+;+;+;+;+;+;+;+;+;+;+;+;+;+;+;+;+;+;+;+;+;+	4226	4.70202	5.40393	9.19411	9.27724	3.52409e-14	3.18552e-12	-0.85201
ARHGEF40	14;14;14;14;14;14;14;14;14;14;14;14;14;14;14;14;14;14;14;14;14;14;14;14;14;14;14;14;14;14;14;14;14;14;14;14;14;14;14;14;14;14;14;14;14;14;14;14;14;14;14;14;14;14;14;14;14;14;14;14;14;14;14;14;14;14;14;14;14;14;14;14;14;14;14;14;14;14;14;14;14;14;14;14;14;14;14;14;14;14;14;14;14;14;14;14;14;14;14;14;14;14;14;14;14	21070270;21070273;21070291;21070317;21070368;21073045;21073045;21073045;21073045;21073045;21073932;21073932;21073932;21073932;21074777;21075332;21075332;21075332;21075332;21075332;21075623;21075645;21075645;21076360;21076360;21076360;21076360;21076360;21076536;21076563;21076563;21076563;21076774;21076774;21076774;21076774;21078177;21078177;21078177;21078177;21078373;21078373;21078373;21078884;210…	21070399;21070399;21070399;21070399;21070399;21073178;21073242;21073242;21073242;21073242;21075180;21075180;21074991;21075180;21075180;21075765;21075499;21075553;21075499;21075499;21075765;21075765;21075765;21076456;21076456;21076456;21076456;21076456;21076643;21076643;21076643;21076643;21076890;21076890;21076890;21076890;21078207;21078272;21078272;21078272;21078488;21078488;21078488;21079010;210…	+;+;+;+;+;+;+;+;+;+;+;+;+;+;+;+;+;+;+;+;+;+;+;+;+;+;+;+;+;+;+;+;+;+;+;+;+;+;+;+;+;+;+;+;+;+;+;+;+;+;+;+;+;+;+;+;+;+;+;+;+;+;+;+;+;+;+;+;+;+;+;+;+;+;+;+;+;+;+;+;+;+;+;+;+;+;+;+;+;+;+;+;+;+;+;+;+;+;+;+;+;+;+;+;+	8189	10.5334	10.5574	14.5489	15.1894	3.62526e-14	3.25759e-12	-0.47755
NCF1	7;7;7;7;7;7;7;7;7;7;7;7;7;7;7;7;7;7;7;7;7;7;7;7;7;7;7;7;7;7;7;7;7;7;7;7;7;7;7;7;7;7;7;7;7;7;7;7;7;7;7;7;7;7;7;7;7;7;7;7;7;7;7;7;7;7	74773962;74774011;74774011;74776809;74777267;74777267;74777267;74777267;74777267;74777269;74777269;74777269;74777269;74777554;74778307;74779082;74779082;74779082;74779082;74779082;74779082;74779082;74779257;74779257;74779257;74779257;74779257;74779257;74779257;74779257;74780157;74780396;74780780;74780780;74780780;74780780;74780780;74780780;74780780;74780780;74780780;74781552;74782939;74782939;747…	74774103;74774103;74774103;74776853;74777347;74777347;74777420;74777347;74777347;74777347;74777347;74777347;74777347;74777701;74778399;74779157;74779157;74779157;74779157;74779157;74779157;74779157;74779422;74779422;74779422;74779422;74779422;74779422;74779422;74779422;74780226;74780835;74780835;74780835;74780835;74780802;74780835;74780835;74780835;74780835;74780835;74781622;74783405;74783632;747…	+;+;+;+;+;+;+;+;+;+;+;+;+;+;+;+;+;+;+;+;+;+;+;+;+;+;+;+;+;+;+;+;+;+;+;+;+;+;+;+;+;+;+;+;+;+;+;+;+;+;+;+;+;+;+;+;+;+;+;+;+;+;+;+;+;+	3462	36.8942	37.0529	26.0391	27.8497	3.64801e-14	3.25874e-12	0.474773
MT2A	16;16;16;16;16;16;16;16;16;16;16	56608199;56608584;56608595;56608606;56608690;56608992;56608992;56608992;56609263;56609263;56609263	56608683;56609057;56609497;56608683;56608804;56609494;56609057;56609057;56609497;56609497;56609476	+;+;+;+;+;+;+;+;+;+;+	1299	14.2818	11.9296	5.3972	5.06642	3.7838e-14	3.36028e-12	1.34152
ARHGEF2	1;1;1;1;1;1;1;1;1;1;1;1;1;1;1;1;1;1;1;1;1;1;1;1;1;1;1;1;1;1;1;1;1;1;1;1;1;1;1;1;1;1;1;1;1;1;1;1;1;1;1;1;1;1;1;1;1;1;1;1;1;1;1;1;1;1;1;1;1;1;1;1;1;1;1;1;1;1;1;1;1;1;1;1;1;1;1;1;1;1;1;1;1;1;1;1;1;1;1;1;1;1;1;1;1;1;1;1;1;1;1;1;1;1;1;1;1;1;1;1;1;1;1;1;1;1;1;1;1;1;1;1;1;1;1;1;1;1;1;1;1;1;1;1;1;1;1;1;1;1;1;1;1;1;1;1;1;1;1;1;1;1;1;1;1;1;1;1	155946851;155946854;155946855;155946855;155946856;155947367;155947942;155950269;155950299;155950299;155950299;155950299;155950299;155950829;155950829;155950829;155950829;155950829;155950829;155950874;155951483;155951483;155951483;155951483;155951483;155951483;155951741;155951741;155951741;155951741;155951741;155951741;155951919;155951919;155951919;155951919;155951919;155952116;155952116;155952116…	155948015;155948015;155947080;155948015;155948015;155948015;155948015;155950482;155950482;155950482;155950482;155950482;155950482;155951272;155950872;155951272;155951272;155951272;155951272;155951272;155951533;155951533;155951533;155951533;155951533;155951533;155951776;155951776;155951748;155951776;155951776;155951776;155951986;155951986;155951986;155951986;155951986;155952235;155952235;155952235…	-;-;-;-;-;-;-;-;-;-;-;-;-;-;-;-;-;-;-;-;-;-;-;-;-;-;-;-;-;-;-;-;-;-;-;-;-;-;-;-;-;-;-;-;-;-;-;-;-;-;-;-;-;-;-;-;-;-;-;-;-;-;-;-;-;-;-;-;-;-;-;-;-;-;-;-;-;-;-;-;-;-;-;-;-;-;-;-;-;-;-;-;-;-;-;-;-;-;-;-;-;-;-;-;-;-;-;-;-;-;-;-;-;-;-;-;-;-;-;-;-;-;-;-;-;-;-;-	9135	31.7325	32.3158	25.5052	25.0818	3.92879e-14	3.46876e-12	0.35826
TGM5	15;15;15;15;15;15;15;15;15;15;15;15;15;15;15;15;15;15;15;15;15;15;15;15;15;15;15;15;15;15;15;15;15;15;15;15;15;15;15;15;15;15;15;15;15;15;15;15;15;15;15;15;15;15;15;15;15;15;15;15;15;15;15;15;15;15;15;15;15;15;15;15;15;15;15	43232595;43232595;43232595;43233158;43233158;43233177;43233554;43233554;43233554;43233554;43233554;43233554;43234769;43234769;43234769;43234769;43234769;43234769;43235469;43235469;43235469;43235469;43235469;43235469;43238817;43238817;43238817;43238817;43238817;43238817;43239053;43239163;43239163;43239163;43239163;43239163;43239163;43239212;43240852;43240852;43240852;43240852;43240852;43240852;432…	43233344;43233344;43233344;43233344;43233344;43233344;43233687;43233687;43233687;43233687;43233687;43233687;43234929;43234929;43234929;43234929;43234929;43234929;43235837;43235837;43235837;43235837;43235837;43235837;43239056;43239056;43239056;43239056;43239056;43239056;43239266;43239743;43239266;43239266;43239266;43239266;43239266;43239266;43240990;43240990;43240990;43240990;43240990;43240990;432…	-;-;-;-;-;-;-;-;-;-;-;-;-;-;-;-;-;-;-;-;-;-;-;-;-;-;-;-;-;-;-;-;-;-;-;-;-;-;-;-;-;-;-;-;-;-;-;-;-;-;-;-;-;-;-;-;-;-;-;-;-;-;-;-;-;-;-;-;-;-;-;-;-;-;-	3631	9.66772	10.0831	5.6431	5.55409	4.22025e-14	3.70455e-12	0.836368
HDLBP	2;2;2;2;2;2;2;2;2;2;2;2;2;2;2;2;2;2;2;2;2;2;2;2;2;2;2;2;2;2;2;2;2;2;2;2;2;2;2;2;2;2;2;2;2;2;2;2;2;2;2;2;2;2;2;2;2;2;2;2;2;2;2;2;2;2;2;2;2;2;2;2;2;2;2;2;2;2;2;2;2;2;2;2;2;2;2;2;2;2;2;2;2;2;2;2;2;2;2;2;2;2;2;2;2;2;2;2;2;2;2;2;2;2;2;2;2;2;2;2;2;2;2;2;2;2;2;2;2;2;2;2;2;2;2;2;2;2;2;2;2;2;2;2;2;2;2;2;2;2;2;2;2;2;2;2;2;2;2;2;2;2;2;2;2;2;2;2;2;2;2;2;2;2;2;2;2;2;2;2;2;2;2;2;2;2;2;2;2;2;2;2;2;2;2;2;2;2;2;2…	241227264;241227267;241229212;241229212;241229224;241229224;241229439;241229462;241229483;241229833;241229833;241229833;241229833;241229833;241229833;241229833;241230069;241230153;241230153;241230153;241230153;241230153;241230153;241230204;241230759;241230759;241230759;241230759;241230759;241230759;241230759;241230759;241230775;241233820;241233820;241233820;241233820;241233820;241233820;241233853…	241229687;241229687;241229687;241229687;241229687;241230269;241229687;241229961;241229687;241229983;241229961;241229961;241229961;241229961;241229961;241229961;241230269;241230269;241230176;241230269;241230269;241230269;241230269;241230269;241231343;241230848;241230824;241230944;241230944;241230944;241230944;241230944;241230944;241233963;241233963;241233963;241233963;241233963;241233963;241233963…	-;-;-;-;-;-;-;-;-;-;-;-;-;-;-;-;-;-;-;-;-;-;-;-;-;-;-;-;-;-;-;-;-;-;-;-;-;-;-;-;-;-;-;-;-;-;-;-;-;-;-;-;-;-;-;-;-;-;-;-;-;-;-;-;-;-;-;-;-;-;-;-;-;-;-;-;-;-;-;-;-;-;-;-;-;-;-;-;-;-;-;-;-;-;-;-;-;-;-;-;-;-;-;-;-;-;-;-;-;-;-;-;-;-;-;-;-;-;-;-;-;-;-;-;-;-;-;-	12182	28.4725	28.4471	37.3344	36.0151	4.29657e-14	3.74987e-12	-0.347934
HIVEP2	6;6;6;6;6;6;6;6;6;6;6;6;6;6;6;6;6;6;6;6;6;6;6;6;6;6;6;6;6;6	142751467;142751468;142751469;142759772;142759772;142759772;142761464;142761464;142761464;142764799;142764799;142764799;142768382;142768382;142768382;142769552;142769552;142769552;142776147;142776147;142776147;142779543;142783521;142783521;142783521;142836935;142836935;142836935;142836935;142945099	142753931;142753931;142753931;142760667;142760667;142760667;142761565;142761565;142761565;142764974;142764974;142764974;142768536;142768536;142768536;142775125;142775125;142775125;142776191;142776191;142776191;142779592;142783615;142783615;142783615;142837047;142837047;142837047;142837047;142945201	-;-;-;-;-;-;-;-;-;-;-;-;-;-;-;-;-;-;-;-;-;-;-;-;-;-;-;-;-;-	9774	2.74946	2.63784	4.53986	4.72785	4.38419e-14	3.80447e-12	-0.764304
PRDM8	4;4;4;4;4;4;4;4;4;4;4;4;4;4;4;4;4;4;4;4;4;4;4;4;4;4;4;4;4;4;4;4;4;4;4;4;4;4;4;4;4;4;4;4;4;4;4;4;4;4;4;4;4;4;4;4;4;4	80183879;80183881;80184264;80184285;80184285;80184302;80184650;80185270;80185270;80185365;80185368;80191472;80191472;80191472;80191472;80191472;80194113;80194113;80194113;80194113;80194113;80194113;80194113;80194113;80196013;80196013;80196013;80196013;80196352;80196352;80196352;80196352;80196352;80196352;80196352;80196352;80196352;80196963;80196963;80196963;80196963;80196963;80197504;80197625;801…	80184055;80184055;80184351;80184351;80184351;80184351;80184753;80185518;80185518;80185518;80185518;80191569;80191569;80191569;80191569;80191569;80194239;80194239;80194239;80194239;80194239;80194239;80194239;80194239;80196124;80196124;80196124;80196124;80196497;80196601;80196601;80196601;80196419;80196601;80196601;80196598;80196601;80197216;80197216;80197195;80197216;80197121;80197763;80197763;801…	+;+;+;+;+;+;+;+;+;+;+;+;+;+;+;+;+;+;+;+;+;+;+;+;+;+;+;+;+;+;+;+;+;+;+;+;+;+;+;+;+;+;+;+;+;+;+;+;+;+;+;+;+;+;+;+;+;+	4588	5.1338	5.47136	2.48441	2.83817	6.10703e-14	5.26939e-12	1.01345
PTGER4	5;5;5;5;5;5;5;5;5;5;5;5	40679498;40679930;40680951;40680951;40681490;40681687;40681702;40685371;40685392;40691779;40691779;40691779	40680478;40680478;40681860;40681680;40681860;40681860;40681860;40685483;40685451;40692043;40691967;40693735	+;+;+;+;+;+;+;+;+;+;+;+	3961	9.29851	10.0209	5.64116	5.48301	6.57281e-14	5.63925e-12	0.813822
STAT1	2;2;2;2;2;2;2;2;2;2;2;2;2;2;2;2;2;2;2;2;2;2;2;2;2;2;2;2;2;2;2;2;2;2;2;2;2;2;2;2;2;2;2;2;2;2;2;2;2;2;2;2;2;2;2;2;2;2;2;2;2;2;2;2;2;2;2;2;2;2;2;2;2;2;2;2;2;2;2;2;2;2;2;2;2;2;2;2;2;2;2;2;2;2;2;2;2;2;2;2;2;2;2;2;2;2;2;2;2;2;2;2;2;2;2;2;2;2;2;2;2;2;2;2;2;2;2;2;2;2;2;2;2;2;2;2;2;2;2;2;2;2;2;2;2;2;2;2;2;2;2;2;2;2;2;2;2;2;2;2;2;2;2;2;2;2;2;2;2;2	190964358;190969034;190969036;190970291;190970498;190970582;190974830;190974830;190974830;190974830;190974830;190975310;190975537;190975627;190975642;190975812;190975812;190975812;190975812;190976840;190976840;190976840;190976840;190976840;190976840;190976840;190978491;190978856;190978856;190978856;190978856;190978856;190978856;190979772;190979772;190979772;190979772;190979772;190979772;190979772…	190964694;190970717;190970717;190970717;190970717;190970717;190974932;190974932;190974932;190974935;190974932;190975388;190975887;190975887;190975887;190975887;190975887;190975887;190975887;190977025;190977025;190976922;190977025;190977025;190977025;190977025;190979001;190979001;190979001;190979001;190979001;190979001;190979001;190979866;190979866;190979866;190979866;190979866;190979866;190979866…	-;-;-;-;-;-;-;-;-;-;-;-;-;-;-;-;-;-;-;-;-;-;-;-;-;-;-;-;-;-;-;-;-;-;-;-;-;-;-;-;-;-;-;-;-;-;-;-;-;-;-;-;-;-;-;-;-;-;-;-;-;-;-;-;-;-;-;-;-;-;-;-;-;-;-;-;-;-;-;-;-;-;-;-;-;-;-;-;-;-;-;-;-;-;-;-;-;-;-;-;-;-;-;-;-;-;-;-;-;-;-;-;-;-;-;-;-;-;-;-;-;-;-;-;-;-;-;-	6053	26.1572	26.7767	19.7129	20.4641	6.62367e-14	5.65095e-12	0.415883
RP11-394B2.1	16	70661667	70665836	+	4170	17.9266	18.1464	12.2463	12.299	6.87996e-14	5.83682e-12	0.573385
EPB41	1;1;1;1;1;1;1;1;1;1;1;1;1;1;1;1;1;1;1;1;1;1;1;1;1;1;1;1;1;1;1;1;1;1;1;1;1;1;1;1;1;1;1;1;1;1;1;1;1;1;1;1;1;1;1;1;1;1;1;1;1;1;1;1;1;1;1;1;1;1;1;1;1;1;1;1;1;1;1;1;1;1;1;1;1;1;1;1;1;1;1;1;1;1;1;1;1;1;1;1;1;1;1;1;1;1;1;1;1;1;1;1;1;1;1;1;1;1;1;1;1;1;1;1;1;1;1;1;1;1;1;1;1;1;1;1;1;1;1;1;1;1;1;1;1;1;1;1;1;1;1;1;1;1;1;1;1;1;1	28887091;28887091;28887121;28887124;28887124;28887172;28893741;28914579;28987431;28987431;28987431;28987431;28987431;28987431;28987448;28987448;28989356;28989356;28993330;28993330;28993330;28993330;28993330;28993330;28993330;28993330;28997215;28997215;28997215;28997215;28997215;28997215;29011865;29011865;29011865;29011865;29011865;29011865;29011865;29015692;29015692;29015692;29015692;29015692;290…	28887210;28887210;28887210;28887210;28887210;28887210;28893837;28914768;28987905;28987905;28987905;28987905;28987905;28987905;28987905;28987905;28989435;28989435;28993542;28993542;28993542;28993542;28993542;28993456;28993542;28993542;28997319;28997319;28997319;28997319;28997319;28997319;29011907;29011907;29011907;29011907;29011907;29011907;29011907;29015767;29015767;29015767;29015767;29015767;290…	+;+;+;+;+;+;+;+;+;+;+;+;+;+;+;+;+;+;+;+;+;+;+;+;+;+;+;+;+;+;+;+;+;+;+;+;+;+;+;+;+;+;+;+;+;+;+;+;+;+;+;+;+;+;+;+;+;+;+;+;+;+;+;+;+;+;+;+;+;+;+;+;+;+;+;+;+;+;+;+;+;+;+;+;+;+;+;+;+;+;+;+;+;+;+;+;+;+;+;+;+;+;+;+;+;+;+;+;+;+;+;+;+;+;+;+;+;+;+;+;+;+;+;+;+;+;+;+	10739	4.91588	5.1687	7.45513	7.61233	7.31264e-14	6.16943e-12	-0.561253
BOP1	8;8;8;8;8;8;8;8;8;8;8;8;8;8;8;8;8;8;8;8;8;8;8;8;8;8;8;8;8;8;8;8;8	144262102;144262396;144262588;144262616;144262673;144262853;144262853;144263221;144263478;144263692;144263831;144263981;144264225;144264342;144264515;144264515;144264544;144264714;144264714;144264714;144264917;144264917;144264917;144264934;144265583;144276224;144276224;144281684;144289095;144289095;144291272;144291272;144291272	144262317;144262503;144262672;144262788;144262737;144263557;144263141;144263401;144263610;144263761;144263911;144264142;144264437;144264437;144264616;144264616;144264616;144264831;144264831;144264831;144265071;144265459;144265071;144265071;144266086;144276304;144276304;144281933;144289304;144289304;144291367;144291370;144291370	-;-;-;-;-;-;-;-;-;-;-;-;-;-;-;-;-;-;-;-;-;-;-;-;-;-;-;-;-;-;-;-;-	3716	25.9047	28.7038	38.9998	37.496	7.62033e-14	6.3935e-12	-0.468607
FXYD5	19;19;19;19;19;19;19;19;19;19;19;19;19;19;19;19;19;19;19;19;19;19;19;19;19;19;19;19;19;19;19;19;19;19;19;19;19;19;19;19;19;19;19;19;19;19;19;19;19;19;19;19;19;19;19;19;19;19;19;19;19;19;19;19;19;19;19;19;19;19;19;19;19;19;19;19;19;19;19;19;19;19;19;19;19;19;19;19;19;19;19;19;19;19;19;19	35154730;35154730;35154743;35154747;35154753;35154753;35154767;35154773;35154787;35154942;35155533;35155551;35155551;35155551;35155551;35155551;35155551;35155551;35155551;35156844;35157421;35157421;35157421;35157421;35157421;35157421;35157421;35157421;35157421;35157421;35158344;35158344;35158344;35158344;35158344;35158344;35158344;35158344;35158344;35158344;35159516;35160709;35160709;35160709;351…	35154809;35154809;35154809;35154809;35154809;35154869;35154809;35155611;35154809;35155032;35155611;35155611;35155611;35155611;35155611;35155611;35155611;35155611;35155611;35156974;35157501;35157501;35157501;35157501;35157501;35157501;35157617;35157501;35157501;35157501;35158400;35158400;35158400;35158400;35158400;35158400;35158400;35158400;35158400;35158400;35159999;35160801;35160801;35160801;351…	+;+;+;+;+;+;+;+;+;+;+;+;+;+;+;+;+;+;+;+;+;+;+;+;+;+;+;+;+;+;+;+;+;+;+;+;+;+;+;+;+;+;+;+;+;+;+;+;+;+;+;+;+;+;+;+;+;+;+;+;+;+;+;+;+;+;+;+;+;+;+;+;+;+;+;+;+;+;+;+;+;+;+;+;+;+;+;+;+;+;+;+;+;+;+;+	2993	75.3087	73.6824	59.3472	57.1868	7.7962e-14	6.50512e-12	0.372353
ADAMTS1	21;21;21;21;21;21;21;21;21;21;21;21;21;21;21;21;21;21;21;21;21;21;21;21;21;21;21;21	26835747;26836287;26838093;26838439;26838439;26838439;26839587;26839587;26839875;26839875;26839875;26840276;26840998;26840998;26841077;26841120;26841858;26841858;26841858;26841969;26842339;26842339;26842339;26842339;26842990;26843466;26843742;26844225	26838278;26838278;26838278;26839762;26838614;26838614;26839762;26839762;26840562;26840489;26840061;26840562;26841711;26841165;26841165;26841165;26841990;26841990;26841990;26841990;26842685;26842685;26842685;26842685;26843018;26843540;26843777;26845409	-;-;-;-;-;-;-;-;-;-;-;-;-;-;-;-;-;-;-;-;-;-;-;-;-;-;-;-	7063	6.86279	7.275	10.8293	10.5825	8.06784e-14	6.69498e-12	-0.58103
GTF2IRD2B	7;7;7;7;7;7;7;7;7;7;7;7;7;7;7;7;7;7;7;7;7;7;7;7;7;7;7;7;7;7;7;7;7;7;7;7;7;7;7;7;7;7;7;7;7;7;7;7;7;7;7;7;7;7;7;7;7;7;7;7;7;7;7;7;7;7;7;7;7;7;7;7;7;7;7;7;7;7;7;7;7;7;7;7;7;7;7;7;7;7;7;7;7	75092573;75092573;75092581;75092592;75092592;75092600;75092612;75093851;75108960;75108960;75108960;75108960;75108960;75108960;75112397;75112397;75112397;75112397;75112397;75112397;75120627;75120891;75120891;75120891;75120891;75120891;75123136;75123136;75123136;75123136;75123136;75123136;75123488;75123488;75123488;75123488;75125657;75125916;75125916;75125916;75125916;75126342;75126342;75126342;751…	75092765;75092765;75092765;75092765;75092765;75092765;75092765;75094141;75109063;75109063;75109063;75109063;75109063;75109063;75112699;75112535;75112535;75112535;75112535;75112535;75121010;75121010;75121010;75121010;75121010;75121010;75123189;75123319;75123319;75123319;75123319;75123877;75123516;75123516;75123516;75123516;75125970;75125970;75125970;75125970;75125970;75126385;75126385;75126385;751…	+;+;+;+;+;+;+;+;+;+;+;+;+;+;+;+;+;+;+;+;+;+;+;+;+;+;+;+;+;+;+;+;+;+;+;+;+;+;+;+;+;+;+;+;+;+;+;+;+;+;+;+;+;+;+;+;+;+;+;+;+;+;+;+;+;+;+;+;+;+;+;+;+;+;+;+;+;+;+;+;+;+;+;+;+;+;+;+;+;+;+;+;+	5672	1.21854	1.406	2.96656	3.29859	8.28506e-14	6.83787e-12	-1.23588
DYNLRB1	20;20;20;20;20;20;20;20;20;20;20;20;20;20;20;20	34516409;34516414;34516444;34516455;34526268;34526268;34526268;34526268;34529852;34529852;34534628;34534628;34534628;34540581;34540581;34540581	34516461;34516461;34516461;34516876;34526343;34526343;34526343;34526343;34530234;34531221;34534795;34534795;34534795;34540958;34540958;34540958	+;+;+;+;+;+;+;+;+;+;+;+;+;+;+;+	2460	15.1754	15.9511	9.00963	9.13429	8.81095e-14	7.2326e-12	0.796498
GAS5	1;1;1;1;1;1;1;1;1;1;1;1;1;1;1;1;1;1;1;1;1;1;1;1;1;1;1;1;1;1;1;1;1;1;1;1;1;1;1;1;1;1;1;1;1;1;1;1;1;1;1;1;1;1;1;1;1;1;1;1;1;1;1;1;1;1;1;1;1;1;1;1;1;1;1;1;1;1;1;1;1;1;1;1;1;1;1;1;1;1;1;1;1;1;1;1;1;1;1;1;1;1;1;1;1;1;1;1;1;1;1;1;1;1;1;1;1;1;1;1;1;1;1;1;1;1;1;1;1;1;1;1;1;1;1;1;1;1;1;1;1;1;1;1;1;1;1;1;1;1;1;1;1;1;1;1;1;1;1;1;1;1;1;1;1;1;1;1;1;1;1;1;1;1;1;1;1;1;1;1;1;1;1;1;1;1;1;1;1;1;1;1;1;1;1;1;1;1;1;1…	173863900;173863901;173863901;173863901;173863901;173863901;173863901;173863901;173863901;173863901;173863901;173863902;173863902;173863904;173863911;173863954;173863980;173864016;173864034;173864257;173864257;173864257;173864257;173864257;173864257;173864257;173864257;173864257;173864257;173864257;173864257;173864257;173864257;173864257;173864257;173864484;173864484;173864484;173864484;173864484…	173864075;173864075;173864075;173864075;173864075;173864075;173864075;173864304;173864075;173864075;173864075;173864304;173864075;173864075;173864075;173864075;173864304;173864075;173864075;173864304;173864304;173864304;173864304;173864304;173864506;173864304;173864304;173865282;173864704;173864304;173864304;173864304;173864304;173864304;173864304;173864704;173864506;173864506;173864506;173864506…	-;-;-;-;-;-;-;-;-;-;-;-;-;-;-;-;-;-;-;-;-;-;-;-;-;-;-;-;-;-;-;-;-;-;-;-;-;-;-;-;-;-;-;-;-;-;-;-;-;-;-;-;-;-;-;-;-;-;-;-;-;-;-;-;-;-;-;-;-;-;-;-;-;-;-;-;-;-;-;-;-;-;-;-;-;-;-;-;-;-;-;-;-;-;-;-;-;-;-;-;-;-;-;-;-;-;-;-;-;-;-;-;-;-;-;-;-;-;-;-;-;-;-;-;-;-;-;-	3631	126.883	126.026	101.264	102.188	9.23751e-14	7.54198e-12	0.331931
XAGE1A	X;X;X;X;X;X;X;X;X;X;X;X;X;X	52495676;52495832;52495877;52497316;52497316;52497316;52497864;52497985;52497985;52497985;52500702;52500702;52500702;52500702	52495909;52495909;52496229;52497473;52497457;52497457;52498111;52498111;52498111;52498111;52500812;52500812;52500812;52500812	+;+;+;+;+;+;+;+;+;+;+;+;+;+	1071	162.014	159.119	124.8	121.715	9.32694e-14	7.57428e-12	0.399387
VEGFA	6;6;6;6;6;6;6;6;6;6;6;6;6;6;6;6;6;6;6;6;6;6;6;6;6;6;6;6;6;6;6;6;6;6;6;6;6;6;6;6;6;6;6;6;6;6;6;6;6;6;6;6;6;6;6;6;6;6;6;6;6;6;6;6;6;6;6;6;6;6;6;6;6;6;6;6;6;6;6;6;6;6;6;6;6;6;6;6;6;6;6;6;6;6;6;6;6;6;6;6;6;6;6;6;6;6;6;6;6;6;6;6;6;6;6;6;6;6;6;6;6;6;6;6;6;6;6;6;6;6;6;6;6;6;6;6;6;6;6;6;6;6;6;6;6;6;6;6;6;6;6;6;6;6;6;6;6;6;6;6;6;6;6;6;6;6;6;6;6;6;6;6;6;6;6;6;6;6	43770184;43770209;43770209;43770209;43770209;43770213;43770707;43770707;43770707;43770707;43770707;43770707;43770707;43770782;43770793;43771083;43771153;43771209;43771209;43771247;43771247;43771247;43771247;43771247;43771992;43773172;43774341;43774341;43774341;43774341;43774341;43774341;43774341;43774341;43774341;43774341;43774341;43774341;43774341;43774341;43774341;43774341;43774341;43774341;437…	43771312;43771312;43771312;43771312;43771312;43771312;43771312;43771312;43771312;43771312;43771312;43771312;43771312;43771312;43771312;43771312;43771312;43771312;43771312;43771312;43771312;43771312;43771312;43771312;43772101;43777665;43774392;43774392;43774392;43774392;43774392;43774392;43774392;43774392;43774392;43774392;43774392;43774392;43774392;43774392;43774392;43774392;43774392;43774392;437…	+;+;+;+;+;+;+;+;+;+;+;+;+;+;+;+;+;+;+;+;+;+;+;+;+;+;+;+;+;+;+;+;+;+;+;+;+;+;+;+;+;+;+;+;+;+;+;+;+;+;+;+;+;+;+;+;+;+;+;+;+;+;+;+;+;+;+;+;+;+;+;+;+;+;+;+;+;+;+;+;+;+;+;+;+;+;+;+;+;+;+;+;+;+;+;+;+;+;+;+;+;+;+;+;+;+;+;+;+;+;+;+;+;+;+;+;+;+;+;+;+;+;+;+;+;+;+;+	14431	35.7314	37.374	29.6104	29.2199	9.71355e-14	7.84627e-12	0.331231
GOLGA8R	15;15;15;15;15;15;15;15;15;15;15;15;15;15;15;15;15;15;15;15	30403740;30404001;30404252;30404432;30405107;30405630;30406951;30407275;30407908;30408188;30408402;30409541;30409559;30409746;30409919;30410229;30411119;30411381;30412329;30414115	30403915;30404156;30404349;30404532;30405198;30405705;30407019;30407531;30407992;30408295;30408488;30409650;30412620;30409830;30409966;30410267;30411199;30411440;30412448;30414162	-;-;-;-;-;-;-;-;-;-;-;-;-;-;-;-;-;-;-;-	4433	45.8606	47.8158	59.8128	61.6325	1.20737e-13	9.70111e-12	-0.356604
ANXA4	2;2;2;2;2;2;2;2;2;2;2;2;2;2;2;2;2;2;2;2;2;2;2;2;2;2;2;2;2;2;2;2;2;2;2;2;2;2;2;2;2;2;2;2;2;2;2;2;2;2;2;2;2;2;2;2;2;2;2;2;2;2;2;2;2;2;2;2;2;2;2;2;2;2;2;2;2;2;2;2;2;2;2;2;2	69644425;69652998;69720774;69720791;69741974;69741974;69742102;69742105;69742132;69742133;69781162;69781494;69781520;69781520;69781520;69781520;69781520;69781520;69781520;69781520;69788054;69788054;69788054;69788054;69788054;69788054;69788054;69803393;69804533;69804533;69804533;69804533;69804533;69804533;69804533;69804533;69806385;69806385;69806385;69806385;69806385;69806385;69806385;69807906;698…	69644905;69653282;69720871;69720871;69742175;69742175;69742175;69742175;69742175;69742175;69781299;69781574;69781574;69781574;69781574;69781574;69781574;69781574;69781574;69781560;69788141;69788141;69788141;69788141;69788141;69788141;69788141;69803515;69804589;69804627;69804627;69804627;69804627;69804627;69804627;69804627;69806432;69806498;69806432;69806498;69806498;69806432;69806498;69807996;698…	+;+;+;+;+;+;+;+;+;+;+;+;+;+;+;+;+;+;+;+;+;+;+;+;+;+;+;+;+;+;+;+;+;+;+;+;+;+;+;+;+;+;+;+;+;+;+;+;+;+;+;+;+;+;+;+;+;+;+;+;+;+;+;+;+;+;+;+;+;+;+;+;+;+;+;+;+;+;+;+;+;+;+;+;+	11048	36.7825	36.8997	46.4889	47.1197	1.24737e-13	9.96973e-12	-0.327345
PTK2B	8;8;8;8;8;8;8;8;8;8;8;8;8;8;8;8;8;8;8;8;8;8;8;8;8;8;8;8;8;8;8;8;8;8;8;8;8;8;8;8;8;8;8;8;8;8;8;8;8;8;8;8;8;8;8;8;8;8;8;8;8;8;8;8;8;8;8;8;8;8;8;8;8;8;8;8;8;8;8;8;8;8;8;8;8;8;8;8;8;8;8;8;8;8;8;8;8;8;8;8;8;8;8;8;8;8;8;8;8;8;8;8;8;8;8;8;8;8;8;8;8;8;8;8;8;8;8;8;8;8;8;8;8;8;8;8;8;8;8;8;8;8;8;8;8;8;8;8;8;8;8;8;8;8;8;8;8;8;8;8;8;8;8;8;8;8;8;8;8;8;8;8;8;8;8;8;8;8;8;8;8;8;8;8;8;8;8;8;8;8;8;8;8;8	27311482;27311567;27311629;27312304;27312304;27313205;27313205;27322402;27322402;27322402;27322667;27323267;27325345;27325479;27325564;27325564;27325564;27325564;27326823;27380651;27380654;27396056;27397452;27397548;27397548;27397548;27397548;27397548;27397548;27397548;27419895;27419895;27419895;27419895;27419895;27419895;27419895;27420657;27420657;27420657;27420657;27420657;27420657;27422276;274…	27311709;27311709;27311709;27312387;27312387;27313287;27313287;27322499;27322499;27322499;27322817;27323426;27325432;27325681;27325681;27325681;27325681;27325681;27326883;27380792;27380792;27396295;27397788;27397788;27397788;27397788;27397788;27397788;27397789;27397788;27420073;27420073;27420073;27420073;27420001;27420073;27420073;27420744;27420744;27420744;27420744;27420744;27420744;27422383;274…	+;+;+;+;+;+;+;+;+;+;+;+;+;+;+;+;+;+;+;+;+;+;+;+;+;+;+;+;+;+;+;+;+;+;+;+;+;+;+;+;+;+;+;+;+;+;+;+;+;+;+;+;+;+;+;+;+;+;+;+;+;+;+;+;+;+;+;+;+;+;+;+;+;+;+;+;+;+;+;+;+;+;+;+;+;+;+;+;+;+;+;+;+;+;+;+;+;+;+;+;+;+;+;+;+;+;+;+;+;+;+;+;+;+;+;+;+;+;+;+;+;+;+;+;+;+;+;+	7933	26.7678	26.2456	21.2276	19.561	1.31205e-13	1.04318e-11	0.39589
PACSIN2	22;22;22;22;22;22;22;22;22;22;22;22;22;22;22;22;22;22;22;22;22;22;22;22;22;22;22;22;22;22;22;22;22;22;22;22;22;22;22;22;22;22;22;22;22;22;22;22;22;22;22;22;22;22;22;22;22;22;22;22;22;22;22;22;22;22;22;22;22;22;22;22;22;22;22;22;22;22;22;22;22;22;22;22;22;22;22	42835412;42840944;42858387;42869768;42869771;42869775;42870930;42871128;42876137;42876137;42876137;42876137;42876137;42876137;42876137;42876888;42876888;42876888;42876888;42879048;42879048;42879048;42879048;42879048;42879048;42880617;42882184;42882184;42882184;42882184;42882184;42882184;42884386;42884386;42884386;42884386;42884386;42884386;42888643;42888643;42888643;42888643;42888643;42888643;428…	42835493;42841016;42858522;42871469;42871469;42871469;42871469;42871469;42876333;42876333;42876333;42876333;42876333;42876333;42876207;42877010;42877010;42877010;42877010;42879169;42879169;42879169;42879169;42879169;42879169;42880622;42882304;42882304;42882304;42882304;42882304;42882304;42884561;42884561;42884561;42884561;42884561;42884561;42888798;42888798;42888798;42888798;42888798;42888798;428…	-;-;-;-;-;-;-;-;-;-;-;-;-;-;-;-;-;-;-;-;-;-;-;-;-;-;-;-;-;-;-;-;-;-;-;-;-;-;-;-;-;-;-;-;-;-;-;-;-;-;-;-;-;-;-;-;-;-;-;-;-;-;-;-;-;-;-;-;-;-;-;-;-;-;-;-;-;-;-;-;-;-;-;-;-;-;-	4554	16.0656	16.0391	22.7153	22.6891	1.37015e-13	1.0837e-11	-0.482059
GLO1	6;6;6;6;6;6;6;6;6	38675925;38675943;38682012;38682012;38682808;38682808;38684374;38686892;38702971	38677383;38677383;38682101;38682101;38682875;38683215;38684514;38686974;38703141	-;-;-;-;-;-;-;-;-	2352	34.1418	35.2359	48.4437	48.2883	1.47472e-13	1.16036e-11	-0.461599
NCF2	1;1;1;1;1;1;1;1;1;1;1;1;1;1;1;1;1;1;1;1;1;1;1;1;1;1;1;1;1;1;1;1;1;1;1;1;1;1;1;1;1;1;1;1;1;1;1;1;1;1;1;1;1;1;1;1;1;1;1;1;1;1;1;1;1;1;1;1;1;1;1;1;1	183555563;183555563;183555563;183555725;183560096;183560096;183560096;183560096;183560246;183563195;183563195;183563195;183563195;183563195;183563269;183563272;183563434;183563434;183563434;183563434;183563434;183563434;183563434;183564005;183564005;183564005;183564005;183564005;183564005;183565704;183565704;183565704;183565704;183565704;183565704;183566920;183566920;183566920;183566920;183566920…	183556230;183556230;183556230;183556230;183560273;183560273;183560273;183560273;183560273;183563306;183563306;183563306;183563306;183563306;183563306;183563306;183563585;183564051;183563585;183563585;183563585;183563585;183563585;183564030;183564030;183564030;183564030;183564030;183564030;183565779;183565779;183565779;183565779;183565779;183565779;183566988;183566988;183566988;183566988;183566988…	-;-;-;-;-;-;-;-;-;-;-;-;-;-;-;-;-;-;-;-;-;-;-;-;-;-;-;-;-;-;-;-;-;-;-;-;-;-;-;-;-;-;-;-;-;-;-;-;-;-;-;-;-;-;-;-;-;-;-;-;-;-;-;-;-;-;-;-;-;-;-;-;-	2928	10.7621	11.6683	5.77759	6.66284	1.59114e-13	1.24552e-11	0.869312
HMMR	5;5;5;5;5;5;5;5;5;5;5;5;5;5;5;5;5;5;5;5;5;5;5;5;5;5;5;5;5;5;5;5;5;5;5;5;5;5;5;5;5;5;5;5;5;5;5;5;5;5;5;5;5;5;5;5;5;5;5;5;5;5;5;5;5;5;5;5;5;5;5;5;5;5;5;5;5;5;5;5;5;5;5;5;5;5;5	163460203;163460342;163460366;163460550;163460634;163460653;163460657;163460660;163463856;163463856;163463856;163463856;163463856;163463856;163463856;163464723;163464723;163464723;163464723;163464723;163464723;163464723;163467701;163467704;163469641;163469641;163469641;163469641;163469641;163469641;163469641;163471185;163471185;163471185;163471185;163471185;163471185;163471363;163471363;163471363…	163460366;163460422;163460738;163460738;163460738;163460738;163460738;163460738;163463954;163463954;163463954;163463954;163463954;163463954;163463954;163464802;163465208;163464802;163464802;163464802;163464802;163464802;163467748;163467748;163469910;163469829;163469829;163469829;163469829;163469829;163469829;163471271;163471271;163471271;163471271;163471271;163471271;163471463;163471463;163471463…	+;+;+;+;+;+;+;+;+;+;+;+;+;+;+;+;+;+;+;+;+;+;+;+;+;+;+;+;+;+;+;+;+;+;+;+;+;+;+;+;+;+;+;+;+;+;+;+;+;+;+;+;+;+;+;+;+;+;+;+;+;+;+;+;+;+;+;+;+;+;+;+;+;+;+;+;+;+;+;+;+;+;+;+;+;+;+	3936	8.96478	8.58801	14.6062	13.6752	1.67392e-13	1.3036e-11	-0.670392
GCLC	6;6;6;6;6;6;6;6;6;6;6;6;6;6;6;6;6;6;6;6;6;6;6;6;6;6;6;6;6;6;6;6;6;6;6;6;6;6;6;6;6;6;6;6;6;6;6;6;6;6;6;6;6;6;6;6;6;6;6;6;6;6;6;6;6;6;6;6;6;6;6;6;6;6;6;6;6;6;6;6;6;6;6;6;6;6	53497341;53497341;53497346;53498142;53498772;53500045;53500045;53500045;53500045;53500045;53500200;53500247;53500247;53500247;53500247;53500432;53500432;53500432;53500432;53500432;53505261;53505392;53505392;53505392;53505392;53505392;53505803;53505803;53505803;53505803;53505803;53506913;53506913;53506913;53506913;53507480;53507480;53507480;53508595;53508595;53508595;53508597;53509176;53509176;535…	53498967;53498967;53498967;53498967;53498967;53501350;53500165;53500165;53500165;53500165;53500350;53500350;53500350;53500350;53500350;53500513;53500513;53500513;53500513;53500513;53505496;53505664;53505496;53505496;53505496;53505496;53505895;53505895;53505895;53505895;53505895;53507078;53507025;53507025;53507025;53507618;53507618;53507618;53508711;53508711;53508711;53508711;53509250;53509250;535…	-;-;-;-;-;-;-;-;-;-;-;-;-;-;-;-;-;-;-;-;-;-;-;-;-;-;-;-;-;-;-;-;-;-;-;-;-;-;-;-;-;-;-;-;-;-;-;-;-;-;-;-;-;-;-;-;-;-;-;-;-;-;-;-;-;-;-;-;-;-;-;-;-;-;-;-;-;-;-;-;-;-;-;-;-;-	8463	1.27338	1.5152	2.91285	2.73845	1.80486e-13	1.3984e-11	-1.00125
MYO1B	2;2;2;2;2;2;2;2;2;2;2;2;2;2;2;2;2;2;2;2;2;2;2;2;2;2;2;2;2;2;2;2;2;2;2;2;2;2;2;2;2;2;2;2;2;2;2;2;2;2;2;2;2;2;2;2;2;2;2;2;2;2;2;2;2;2;2;2;2;2;2;2;2;2;2;2;2;2;2;2;2;2;2;2;2;2;2;2;2;2;2;2;2;2;2;2;2;2;2;2;2;2;2;2;2;2;2;2;2;2;2;2;2;2;2;2;2;2;2;2;2;2;2;2;2;2;2;2;2;2;2;2;2;2;2;2;2;2;2;2;2;2;2;2;2;2;2;2;2;2;2;2;2;2;2;2;2;2;2;2;2;2;2;2;2;2;2;2;2;2;2;2;2;2;2;2;2;2;2	191245185;191245276;191245389;191245528;191246283;191262999;191263354;191263573;191276885;191276887;191276887;191276887;191276887;191276887;191276887;191276887;191276887;191296111;191296111;191296111;191296111;191296111;191296111;191296111;191296111;191296111;191329935;191329935;191329935;191329935;191329935;191329935;191329935;191329935;191341461;191341461;191341461;191341461;191341461;191341461…	191245257;191245626;191245626;191245611;191246367;191263388;191263388;191263686;191277030;191277030;191277030;191277030;191277030;191277030;191277030;191277030;191277030;191296226;191296226;191296226;191296226;191296226;191296226;191296226;191296226;191296226;191330029;191330029;191330029;191330029;191330029;191330029;191330029;191330029;191341565;191341565;191341565;191341562;191341565;191341565…	+;+;+;+;+;+;+;+;+;+;+;+;+;+;+;+;+;+;+;+;+;+;+;+;+;+;+;+;+;+;+;+;+;+;+;+;+;+;+;+;+;+;+;+;+;+;+;+;+;+;+;+;+;+;+;+;+;+;+;+;+;+;+;+;+;+;+;+;+;+;+;+;+;+;+;+;+;+;+;+;+;+;+;+;+;+;+;+;+;+;+;+;+;+;+;+;+;+;+;+;+;+;+;+;+;+;+;+;+;+;+;+;+;+;+;+;+;+;+;+;+;+;+;+;+;+;+;+	9533	3.33411	3.43176	5.47074	5.43911	1.91136e-13	1.4734e-11	-0.671296
SMYD3	1;1;1;1;1;1;1;1;1;1;1;1;1;1;1;1;1;1;1;1;1;1;1;1;1;1;1;1;1;1;1;1;1;1;1;1;1;1;1;1;1;1;1;1;1;1;1;1;1;1;1;1;1;1;1;1;1;1;1;1;1;1;1;1;1;1;1;1;1;1;1;1;1;1;1;1;1;1;1;1;1;1;1;1;1;1;1;1;1;1;1;1;1;1;1;1;1;1;1;1;1;1;1;1;1;1;1;1;1;1;1;1;1;1	245749342;245749342;245749342;245749342;245749342;245749351;245749351;245749367;245764041;245764041;245764041;245764041;245764041;245764041;245764041;245788861;245814342;245814342;245814342;245858496;245858496;245858496;245858496;245858496;245858496;245858496;245858496;245858498;245858562;245863799;245863799;245863799;245863799;245863799;245863799;245863799;245863799;245863799;245863809;245915530…	245749664;245749664;245749664;245749664;245749664;245749664;245749664;245749664;245764149;245764149;245764149;245764149;245764149;245764149;245764149;245788942;245814415;245814411;245814415;245858670;245858670;245858670;245858647;245858670;245858670;245858670;245858670;245858670;245858670;245863886;245863886;245863886;245863886;245863886;245863886;245863886;245863886;245863886;245863886;245915640…	-;-;-;-;-;-;-;-;-;-;-;-;-;-;-;-;-;-;-;-;-;-;-;-;-;-;-;-;-;-;-;-;-;-;-;-;-;-;-;-;-;-;-;-;-;-;-;-;-;-;-;-;-;-;-;-;-;-;-;-;-;-;-;-;-;-;-;-;-;-;-;-;-;-;-;-;-;-;-;-;-;-;-;-;-;-;-;-;-;-;-;-;-;-;-;-;-;-;-;-;-;-;-;-;-;-;-;-;-;-;-;-;-;-	5866	25.3942	26.2013	19.3312	20.0105	1.9575e-13	1.50135e-11	0.40922
MDC1	6;6;6;6;6;6;6;6;6;6;6;6;6;6;6;6;6;6;6;6;6;6;6;6;6;6;6;6;6;6;6;6;6;6;6;6;6;6;6;6;6;6;6;6;6;6	30699807;30700315;30702553;30702553;30702752;30702752;30703104;30703104;30703418;30703418;30703621;30705448;30705582;30707384;30707384;30707384;30707566;30711412;30711412;30711472;30711667;30711667;30711667;30711874;30711874;30711874;30713208;30713648;30713648;30713803;30713803;30713826;30713833;30713940;30713980;30714031;30715040;30715040;30715040;30715040;30715040;30716882;30716882;30717084;307…	30700632;30700632;30702663;30702663;30702877;30702877;30703286;30703286;30704081;30703537;30706098;30706098;30706098;30707685;30707454;30707454;30708357;30711504;30711504;30711501;30711726;30711726;30711726;30711914;30711931;30713354;30713354;30713717;30713717;30713822;30714183;30713932;30714183;30714183;30714183;30714183;30715178;30715178;30715178;30715178;30715178;30717121;30717075;30717175;307…	-;-;-;-;-;-;-;-;-;-;-;-;-;-;-;-;-;-;-;-;-;-;-;-;-;-;-;-;-;-;-;-;-;-;-;-;-;-;-;-;-;-;-;-;-;-	8064	22.3463	22.9761	28.9431	29.5847	1.96945e-13	1.50292e-11	-0.350927
MFAP4	17;17;17;17;17;17;17;17;17;17;17;17;17;17;17;17;17;17;17;17;17;17;17;17	19383442;19383442;19383442;19383446;19383798;19384415;19385099;19385099;19385099;19385099;19385358;19385358;19385358;19386310;19386310;19386310;19386310;19386760;19386760;19386760;19386760;19387041;19387150;19387150	19384709;19384709;19384709;19383612;19384229;19384709;19385454;19385281;19385281;19385281;19385454;19385454;19385454;19386464;19386464;19386464;19386464;19386838;19386838;19386838;19386932;19387190;19387190;19387240	-;-;-;-;-;-;-;-;-;-;-;-;-;-;-;-;-;-;-;-;-;-;-;-	2152	7.2897	7.36944	12.9475	14.2862	2.00244e-13	1.52045e-11	-0.874698
SIGLEC1	20;20;20;20;20;20;20;20;20;20;20;20;20;20;20;20;20;20;20;20;20;20;20;20;20;20	3686970;3686970;3689155;3689600;3689962;3691340;3691340;3691903;3691903;3692521;3692521;3692862;3692862;3693447;3694221;3694663;3696586;3697085;3697798;3699202;3701342;3703197;3703825;3705744;3706347;3707080	3688619;3690264;3689227;3689702;3690264;3691600;3691600;3692202;3692202;3692772;3692772;3693131;3693079;3693698;3694532;3694923;3696888;3697342;3698133;3699459;3701641;3703451;3704091;3706040;3706706;3707128	-;-;-;-;-;-;-;-;-;-;-;-;-;-;-;-;-;-;-;-;-;-;-;-;-;-	7886	0.345961	0.390716	0.0114715	0.00596109	2.06899e-13	1.56317e-11	5.29795
S100A11	1;1;1;1;1;1	152032506;152032506;152033648;152033648;152036913;152047822	152032823;152032823;152033800;152033800;152037035;152047907	-;-;-;-;-;-	680	160.485	145.997	109.422	103.005	2.10889e-13	1.5813e-11	0.546615
CBWD7	9;9;9;9;9;9;9;9;9;9;9;9;9;9;9;9;9;9;9;9;9;9;9;9;9;9;9;9;9;9;9;9;9;9;9;9;9;9;9;9;9;9;9;9;9;9;9;9;9;9;9;9;9;9;9;9;9;9;9;9;9;9;9;9;9;9;9;9;9;9;9;9;9;9;9;9;9;9;9;9;9;9;9;9;9;9;9;9;9;9;9;9;9;9;9;9;9;9;9;9;9;9;9;9;9;9;9;9;9;9;9;9;9;9;9;9;9;9;9;9;9;9;9;9;9;9;9;9;9;9;9;9;9;9;9;9;9;9;9;9;9;9;9;9;9;9;9;9;9;9;9;9;9;9;9;9;9;9;9;9;9;9;9;9;9;9;9;9;9;9;9;9;9;9;9;9;9;9;9;9;9;9;9;9;9;9;9;9;9;9;9;9;9;9;9;9;9	41131306;41131308;41131309;41131325;41131356;41131356;41131358;41131676;41131677;41131678;41131678;41131679;41131703;41132228;41132228;41132228;41132228;41132228;41132228;41132228;41132228;41132228;41132228;41132228;41132228;41133505;41133505;41133505;41133505;41133505;41133505;41133505;41133505;41133505;41133505;41133505;41133505;41133674;41133674;41133674;41133674;41133674;41133674;41133674;411…	41131840;41131840;41131840;41131840;41133570;41131840;41131840;41131840;41131840;41131840;41131840;41131840;41131840;41132357;41132357;41132357;41132357;41132357;41132357;41132357;41132357;41132357;41132357;41132357;41132357;41133570;41133570;41133570;41133570;41133570;41133570;41133570;41133570;41133570;41133570;41133570;41133570;41133742;41133742;41133742;41134034;41133742;41133742;41133742;411…	-;-;-;-;-;-;-;-;-;-;-;-;-;-;-;-;-;-;-;-;-;-;-;-;-;-;-;-;-;-;-;-;-;-;-;-;-;-;-;-;-;-;-;-;-;-;-;-;-;-;-;-;-;-;-;-;-;-;-;-;-;-;-;-;-;-;-;-;-;-;-;-;-;-;-;-;-;-;-;-;-;-;-;-;-;-;-;-;-;-;-;-;-;-;-;-;-;-;-;-;-;-;-;-;-;-;-;-;-;-;-;-;-;-;-;-;-;-;-;-;-;-;-;-;-;-;-;-	10393	8.19901	8.03078	11.3896	11.1179	2.11382e-13	1.5813e-11	-0.453842
BTG2	1;1;1;1;1	203305491;203305536;203307104;203307104;203309138	203305748;203305748;203307688;203309602;203309569	+;+;+;+;+	2757	24.5084	24.8827	16.5703	16.8803	2.14345e-13	1.59561e-11	0.58021
RNF6	13;13;13;13;13;13;13;13;13;13;13;13;13;13;13;13;13;13;13;13;13;13;13;13;13;13;13;13;13;13;13	26132115;26212762;26212768;26212775;26215139;26215474;26218511;26218511;26218511;26218511;26218511;26219296;26219457;26219457;26219457;26219457;26219457;26221248;26221248;26221248;26221248;26221248;26221248;26221253;26221514;26221514;26221782;26221782;26221835;26222003;26222003	26132451;26215592;26215592;26215592;26215592;26215592;26218606;26218588;26218606;26218606;26218606;26219667;26219667;26219667;26219667;26219667;26219667;26221330;26221330;26221330;26221330;26221330;26221330;26221330;26221691;26221703;26221810;26221842;26222089;26222493;26222261	-;-;-;-;-;-;-;-;-;-;-;-;-;-;-;-;-;-;-;-;-;-;-;-;-;-;-;-;-;-;-	4621	20.4673	20.6702	27.5151	28.8606	2.27733e-13	1.687e-11	-0.436465
KIAA0922	4;4;4;4;4;4;4;4;4;4;4;4;4;4;4;4;4;4;4;4;4;4;4;4;4;4;4;4;4;4;4;4;4;4;4;4;4;4;4;4;4;4;4;4;4;4;4;4;4;4;4;4;4;4;4;4;4;4;4;4;4;4;4;4;4;4;4;4;4;4;4;4;4;4;4;4;4;4;4;4;4;4;4;4;4;4;4;4;4;4;4;4;4;4;4;4;4;4;4;4;4;4;4;4;4;4;4;4;4;4;4;4;4;4;4;4;4;4	153466346;153466348;153466349;153467211;153467211;153467211;153473845;153473845;153550073;153550073;153550073;153554181;153555787;153555787;153555787;153555787;153555896;153556966;153556966;153556966;153556966;153556966;153558258;153558258;153558258;153558258;153580826;153580826;153580826;153581407;153581407;153581407;153583190;153583190;153583190;153583538;153583564;153583564;153583564;153584835…	153466521;153466521;153466521;153467281;153467281;153467281;153473888;153473888;153550141;153550141;153550141;153554231;153555910;153555910;153555910;153555910;153555910;153557082;153557082;153557065;153557082;153557082;153558368;153558771;153558368;153558368;153580903;153580903;153580903;153581560;153581560;153581560;153583248;153583248;153583248;153583672;153583672;153583672;153583672;153584931…	+;+;+;+;+;+;+;+;+;+;+;+;+;+;+;+;+;+;+;+;+;+;+;+;+;+;+;+;+;+;+;+;+;+;+;+;+;+;+;+;+;+;+;+;+;+;+;+;+;+;+;+;+;+;+;+;+;+;+;+;+;+;+;+;+;+;+;+;+;+;+;+;+;+;+;+;+;+;+;+;+;+;+;+;+;+;+;+;+;+;+;+;+;+;+;+;+;+;+;+;+;+;+;+;+;+;+;+;+;+;+;+;+;+;+;+;+;+	6393	9.35307	10.1708	6.6012	6.14729	2.38891e-13	1.76107e-11	0.632198
TSC22D3	X;X;X;X;X;X;X;X;X;X;X;X;X;X;X;X;X;X;X;X;X;X;X;X;X;X;X;X;X;X;X;X;X;X;X;X;X;X;X;X;X;X;X;X;X;X;X;X;X;X;X	107713221;107713221;107713221;107713224;107713224;107714000;107714370;107714487;107714677;107715773;107715898;107715899;107715899;107715899;107715899;107715899;107715899;107715899;107715899;107715899;107715903;107715912;107715923;107716315;107716690;107716690;107721859;107775100;107775100;107775100;107775100;107775100;107775100;107775100;107775100;107775100;107775118;107775167;107775246;107775780…	107714749;107714749;107714749;107714749;107714749;107714749;107714749;107714749;107714749;107715950;107715950;107716401;107715950;107715950;107715950;107715950;107715950;107715950;107715950;107715950;107715950;107715950;107715950;107716545;107717062;107717135;107722272;107775525;107775525;107775525;107775511;107775525;107775294;107775787;107775511;107775525;107775525;107775525;107775525;107775988…	-;-;-;-;-;-;-;-;-;-;-;-;-;-;-;-;-;-;-;-;-;-;-;-;-;-;-;-;-;-;-;-;-;-;-;-;-;-;-;-;-;-;-;-;-;-;-;-;-;-;-	4766	5.61946	5.62829	3.14138	3.0478	2.4383e-13	1.78879e-11	0.879228
IFIT2	10;10;10;10;10;10;10;10;10;10	89283694;89285036;89292289;89301955;89301977;89302046;89305962;89305962;89305962;89307376	89283891;89285264;89292473;89302128;89302128;89302128;89309276;89307372;89308900;89308919	+;+;+;+;+;+;+;+;+;+	4101	2.10667	2.033	0.584564	0.561679	2.59126e-13	1.89187e-11	1.86758
BRD8	5;5;5;5;5;5;5;5;5;5;5;5;5;5;5;5;5;5;5;5;5;5;5;5;5;5;5;5;5;5;5;5;5;5;5;5;5;5;5;5;5;5;5;5;5;5;5;5;5;5;5;5;5;5;5;5;5;5;5;5;5;5;5;5;5;5;5;5;5;5;5;5;5;5;5;5;5;5;5;5;5;5;5;5;5;5;5;5;5;5;5;5;5;5;5;5;5;5;5;5;5;5;5;5;5;5;5;5;5;5;5;5;5;5;5;5;5;5;5;5;5;5;5;5;5;5;5;5;5;5;5;5;5;5;5;5;5;5;5;5;5;5;5;5;5;5;5;5;5;5;5;5;5;5;5;5;5;5;5;5;5;5;5;5;5;5;5;5;5;5;5;5;5;5;5;5;5;5;5;5;5;5;5;5;5;5;5;5;5;5;5;5;5;5;5;5;5;5;5;5…	138139766;138140627;138140705;138145177;138145177;138145789;138145789;138149640;138149640;138150745;138150745;138152482;138152482;138156882;138156882;138156882;138156882;138156882;138156882;138156897;138156915;138157642;138159555;138159555;138159555;138159555;138159555;138159575;138160069;138160069;138160069;138160069;138160069;138160069;138160069;138160069;138160069;138160069;138160091;138160891…	138140166;138140882;138140882;138145245;138145245;138145878;138145878;138149797;138149797;138151008;138151008;138152655;138152760;138157267;138157267;138157267;138157267;138157267;138157267;138157267;138157267;138157894;138159599;138159599;138159599;138159599;138159599;138159599;138160173;138160173;138160173;138160173;138160173;138160173;138160173;138160129;138160173;138160173;138160173;138161068…	-;-;-;-;-;-;-;-;-;-;-;-;-;-;-;-;-;-;-;-;-;-;-;-;-;-;-;-;-;-;-;-;-;-;-;-;-;-;-;-;-;-;-;-;-;-;-;-;-;-;-;-;-;-;-;-;-;-;-;-;-;-;-;-;-;-;-;-;-;-;-;-;-;-;-;-;-;-;-;-;-;-;-;-;-;-;-;-;-;-;-;-;-;-;-;-;-;-;-;-;-;-;-;-;-;-;-;-;-;-;-;-;-;-;-;-;-;-;-;-;-;-;-;-;-;-;-;-	7046	13.5264	13.5047	18.7322	18.1338	2.60836e-13	1.89524e-11	-0.429814
MCM4	8;8;8;8;8;8;8;8;8;8;8;8;8;8;8;8;8;8;8;8;8;8;8;8;8;8;8;8;8;8;8;8;8;8;8;8;8;8;8;8;8;8;8;8;8;8;8;8;8;8;8;8;8;8;8;8;8;8;8;8;8;8;8;8;8;8;8;8;8;8;8;8;8;8;8;8;8;8;8;8;8;8;8	47960185;47960898;47960936;47960949;47960952;47960958;47961131;47961131;47961131;47961131;47961131;47961497;47961516;47961516;47961516;47961516;47961516;47961857;47962053;47962053;47962053;47962053;47962053;47962078;47962305;47962305;47962305;47962305;47962305;47962305;47962764;47962764;47962764;47962764;47962945;47962945;47962945;47962945;47964574;47964574;47964574;47964574;47964592;47966187;479…	47960320;47961014;47961214;47961014;47961014;47961014;47961426;47961586;47961214;47961214;47961214;47961680;47961680;47961680;47961680;47961680;47961680;47962216;47962216;47962149;47962216;47962216;47962216;47962216;47962406;47962406;47962406;47962406;47962406;47962327;47962859;47962859;47962859;47962859;47963040;47963040;47963040;47963040;47964712;47964665;47964712;47964712;47964712;47966320;479…	+;+;+;+;+;+;+;+;+;+;+;+;+;+;+;+;+;+;+;+;+;+;+;+;+;+;+;+;+;+;+;+;+;+;+;+;+;+;+;+;+;+;+;+;+;+;+;+;+;+;+;+;+;+;+;+;+;+;+;+;+;+;+;+;+;+;+;+;+;+;+;+;+;+;+;+;+;+;+;+;+;+;+	6824	29.9452	28.7115	37.8082	37.9779	2.70768e-13	1.95804e-11	-0.351553
PDSS1	10;10;10;10;10;10;10;10;10;10;10;10;10;10;10;10;10;10;10;10;10;10;10;10;10;10;10;10;10;10	26697659;26702162;26704677;26705286;26705308;26709638;26709638;26720135;26720218;26720343;26723806;26723806;26723806;26724014;26724014;26724014;26734651;26735240;26735240;26735240;26735466;26735466;26735466;26740645;26742497;26742497;26742497;26746333;26746333;26746333	26697840;26702194;26704741;26705394;26705394;26709768;26709768;26720359;26720359;26720359;26723917;26723917;26723917;26724019;26724123;26724123;26734723;26735320;26735320;26735320;26735579;26735579;26735579;26740817;26742577;26742577;26742577;26746782;26746541;26746798	+;+;+;+;+;+;+;+;+;+;+;+;+;+;+;+;+;+;+;+;+;+;+;+;+;+;+;+;+;+	1955	5.79143	6.74458	13.0722	11.9026	2.72517e-13	1.96135e-11	-0.976849
SPRY4	5;5;5;5;5;5;5;5;5;5;5;5	142310427;142312974;142314958;142315109;142319733;142319744;142323890;142323890;142324844;142324844;142324899;142326042	142315155;142315155;142315155;142315155;142319794;142319794;142324417;142324182;142325040;142325001;142325030;142326455	-;-;-;-;-;-;-;-;-;-;-;-	5930	2.28504	1.94847	4.04266	4.37589	2.82377e-13	2.02273e-11	-0.972825
MYBPH	1;1;1;1;1;1;1;1;1;1;1;1;1;1;1;1;1;1;1;1;1;1;1;1	203167811;203167811;203168627;203168627;203168906;203168906;203169253;203169253;203169258;203169268;203170291;203170291;203171061;203171061;203171383;203171383;203171952;203171952;203174430;203174430;203175327;203175327;203175551;203175551	203168091;203168091;203168675;203168675;203169092;203169091;203169389;203169256;203169266;203169389;203170450;203170450;203171200;203171200;203171578;203171578;203172040;203172040;203174597;203174597;203175461;203175461;203175813;203175783	-;-;-;-;-;-;-;-;-;-;-;-;-;-;-;-;-;-;-;-;-;-;-;-	1805	5.36581	5.82398	11.402	11.6155	2.85538e-13	2.03576e-11	-1.02205
ITPR3	6;6;6;6;6;6;6;6;6;6;6;6;6;6;6;6;6;6;6;6;6;6;6;6;6;6;6;6;6;6;6;6;6;6;6;6;6;6;6;6;6;6;6;6;6;6;6;6;6;6;6;6;6;6;6;6;6;6;6;6;6;6;6;6;6;6;6;6;6;6;6;6;6;6;6;6;6;6;6;6;6;6;6;6;6;6;6;6;6;6;6;6;6;6;6;6;6;6;6;6;6;6;6;6;6;6;6;6;6;6;6;6;6;6;6;6;6	33620365;33620615;33621379;33640484;33640484;33655766;33655766;33657932;33657932;33658670;33658670;33659021;33659021;33659466;33659466;33662528;33662528;33662911;33662911;33663500;33663500;33663738;33663738;33664870;33664870;33665053;33665053;33665835;33665835;33667129;33667129;33667792;33667792;33668515;33668515;33668974;33668974;33670325;33670325;33670671;33670671;33671165;33671165;33672029;336…	33620436;33621691;33621691;33640554;33640554;33655887;33655887;33658018;33658018;33658828;33658828;33659119;33659119;33659549;33659549;33662674;33662674;33663006;33663006;33663550;33663550;33663880;33663880;33664969;33664969;33665213;33665213;33665976;33665976;33667290;33667290;33667964;33667964;33668634;33668634;33669156;33669156;33670576;33670576;33670815;33670815;33671306;33671306;33672228;336…	+;+;+;+;+;+;+;+;+;+;+;+;+;+;+;+;+;+;+;+;+;+;+;+;+;+;+;+;+;+;+;+;+;+;+;+;+;+;+;+;+;+;+;+;+;+;+;+;+;+;+;+;+;+;+;+;+;+;+;+;+;+;+;+;+;+;+;+;+;+;+;+;+;+;+;+;+;+;+;+;+;+;+;+;+;+;+;+;+;+;+;+;+;+;+;+;+;+;+;+;+;+;+;+;+;+;+;+;+;+;+;+;+;+;+;+;+	9870	1.60323	1.66188	2.99255	2.92438	2.99569e-13	2.12582e-11	-0.839723
CDC42EP3	2;2;2;2;2;2;2;2;2;2;2;2;2;2	37641882;37641889;37645941;37646484;37646546;37647394;37671426;37672085;37672353;37684483;37688079;37688817;37719538;37738359	37646822;37646822;37646822;37646822;37646822;37647658;37672191;37672199;37672535;37688175;37688175;37688849;37719944;37738468	-;-;-;-;-;-;-;-;-;-;-;-;-;-	10406	11.6452	11.944	8.85863	8.8543	3.08871e-13	2.18163e-11	0.431211
LMNA	1;1;1;1;1;1;1;1;1;1;1;1;1;1;1;1;1;1;1;1;1;1;1;1;1;1;1;1;1;1;1;1;1;1;1;1;1;1;1;1;1;1;1;1;1;1;1;1;1;1;1;1;1;1;1;1;1;1;1;1;1;1;1;1;1;1;1;1;1;1;1;1;1;1;1;1;1;1;1;1;1;1;1;1;1;1;1;1;1;1;1;1;1;1;1;1;1;1;1;1;1;1;1;1;1;1;1;1;1;1;1;1;1;1;1;1;1;1;1;1;1;1;1;1;1;1;1;1;1;1;1;1;1;1;1;1;1;1;1;1;1;1;1;1;1;1;1;1;1;1;1;1;1;1;1;1;1;1	156082573;156082578;156082600;156082631;156082948;156082948;156082948;156082948;156083521;156090471;156090999;156093709;156106658;156109513;156114670;156114670;156114670;156114707;156114711;156114711;156114713;156114713;156114722;156114964;156114964;156123142;156126160;156126174;156126189;156126545;156126555;156126736;156126736;156129827;156130617;156130617;156130617;156130617;156130617;156130617…	156082663;156082663;156082663;156082663;156083184;156083184;156083184;156083184;156083613;156090582;156091097;156093811;156106823;156109746;156115274;156114838;156115274;156115274;156114911;156115066;156114791;156115274;156115274;156115274;156115047;156123395;156126223;156126223;156126223;156126651;156126651;156126915;156126949;156129908;156130773;156130773;156130773;156130773;156130773;156130773…	+;+;+;+;+;+;+;+;+;+;+;+;+;+;+;+;+;+;+;+;+;+;+;+;+;+;+;+;+;+;+;+;+;+;+;+;+;+;+;+;+;+;+;+;+;+;+;+;+;+;+;+;+;+;+;+;+;+;+;+;+;+;+;+;+;+;+;+;+;+;+;+;+;+;+;+;+;+;+;+;+;+;+;+;+;+;+;+;+;+;+;+;+;+;+;+;+;+;+;+;+;+;+;+;+;+;+;+;+;+;+;+;+;+;+;+;+;+;+;+;+;+;+;+;+;+;+;+	6985	15.5649	16.185	11.9475	11.4477	3.44059e-13	2.41893e-11	0.458172
NLRC3	16;16;16;16;16;16;16;16;16;16;16;16;16;16;16;16;16;16;16;16;16;16;16;16;16;16;16;16;16;16;16;16;16;16;16;16;16;16;16;16;16;16;16;16;16;16;16;16;16;16;16;16;16;16;16;16;16;16;16;16;16;16;16;16;16;16;16;16;16;16;16	3539033;3539038;3541825;3542191;3542191;3542191;3542692;3542692;3542692;3543425;3543425;3543425;3544246;3544246;3544246;3548135;3548135;3548135;3548135;3548670;3548670;3548670;3549142;3549142;3549142;3549142;3549697;3549697;3549697;3549697;3550414;3550414;3550414;3550414;3552196;3552196;3552196;3552196;3554242;3554242;3554242;3554242;3555781;3556911;3556911;3556911;3556911;3557593;3557593;3557593…	3541915;3541915;3541915;3542274;3542274;3542274;3542775;3542775;3542775;3543508;3543508;3543508;3544329;3544329;3544329;3548218;3548218;3548218;3548218;3548753;3548753;3548753;3549225;3549225;3549225;3549225;3549780;3549780;3549780;3549780;3550497;3550497;3550497;3550497;3552279;3552279;3552279;3552279;3554325;3554325;3554325;3554325;3555916;3556994;3556994;3556994;3556994;3557676;3557676;3557676…	-;-;-;-;-;-;-;-;-;-;-;-;-;-;-;-;-;-;-;-;-;-;-;-;-;-;-;-;-;-;-;-;-;-;-;-;-;-;-;-;-;-;-;-;-;-;-;-;-;-;-;-;-;-;-;-;-;-;-;-;-;-;-;-;-;-;-;-;-;-;-	6686	3.70649	3.61218	6.03455	6.27866	4.12743e-13	2.88844e-11	-0.732215
LINC01021	5;5;5;5;5;5;5;5;5;5;5;5;5;5;5;5;5;5;5;5;5;5;5;5;5;5	27472292;27472292;27472307;27472307;27472307;27475535;27475535;27475535;27475535;27475535;27475665;27476069;27477639;27477639;27477639;27484926;27484926;27484926;27484926;27489282;27489282;27494119;27494235;27494235;27494235;27495949	27472519;27472519;27472519;27472519;27472519;27475695;27475695;27475695;27475695;27475695;27475695;27476158;27477801;27477801;27477801;27485186;27485029;27485029;27486146;27489386;27489386;27494318;27494318;27494318;27494335;27496401	+;+;+;+;+;+;+;+;+;+;+;+;+;+;+;+;+;+;+;+;+;+;+;+;+;+	2638	4.53329	5.1873	9.1047	9.72971	4.23653e-13	2.95082e-11	-0.935513
CPD	17;17;17;17;17;17;17;17;17;17;17;17;17;17;17;17;17;17;17;17;17;17;17;17;17;17;17;17;17;17;17;17;17;17;17;17;17;17;17;17;17;17;17;17;17;17;17;17;17;17;17;17;17;17;17;17;17;17;17;17;17;17;17;17;17;17;17;17;17;17	30378905;30379616;30380236;30384989;30384989;30384989;30420841;30420841;30421664;30421664;30422674;30422674;30423506;30423506;30427391;30427391;30431772;30431772;30438975;30438975;30438985;30442308;30442308;30442308;30443802;30443802;30443802;30443802;30445691;30445691;30445691;30445691;30447562;30449553;30449553;30449673;30450236;30451711;30451711;30451711;30451711;30451757;30451810;30454021;304…	30379726;30379726;30380642;30385292;30385236;30385236;30420983;30420983;30421833;30421833;30423023;30423023;30423697;30423697;30427558;30427558;30431881;30431881;30439077;30439077;30439077;30442450;30442450;30442450;30444144;30443971;30443971;30443971;30446020;30446020;30446020;30446020;30447564;30449748;30449748;30449748;30450294;30451737;30451846;30451846;30451846;30451846;30451846;30456351;304…	+;+;+;+;+;+;+;+;+;+;+;+;+;+;+;+;+;+;+;+;+;+;+;+;+;+;+;+;+;+;+;+;+;+;+;+;+;+;+;+;+;+;+;+;+;+;+;+;+;+;+;+;+;+;+;+;+;+;+;+;+;+;+;+;+;+;+;+;+;+	12532	7.15153	7.47359	4.95199	5.41288	4.25542e-13	2.95082e-11	0.515094
CARS	11;11;11;11;11;11;11;11;11;11;11;11;11;11;11;11;11;11;11;11;11;11;11;11;11;11;11;11;11;11;11;11;11;11;11;11;11;11;11;11;11;11;11;11;11;11;11;11;11;11;11;11;11;11;11;11;11;11;11;11;11;11;11;11;11;11;11;11;11;11;11;11;11;11;11;11;11;11;11;11;11;11;11;11;11;11;11;11;11;11;11;11;11;11;11;11;11;11;11;11;11;11;11;11;11;11;11;11;11;11;11;11;11;11;11;11;11;11;11;11;11;11;11;11;11;11;11;11;11;11;11;11;11;…	3000922;3000922;3000922;3000929;3000929;3000930;3000930;3000930;3000930;3001962;3001962;3001970;3001970;3001970;3001970;3001970;3001970;3001970;3002541;3002541;3002541;3002541;3002541;3002541;3002541;3005366;3005366;3005366;3005366;3005366;3005366;3005366;3005366;3005366;3006879;3006879;3006879;3006879;3006879;3006879;3006879;3006879;3006879;3007620;3012195;3012195;3012195;3012195;3012195;3012195…	3001248;3001248;3001248;3001248;3001248;3001248;3001248;3001248;3001248;3002053;3002053;3002053;3002174;3002053;3002600;3002053;3002053;3002053;3002600;3002600;3002600;3002600;3002600;3002600;3002600;3005433;3005433;3005433;3005433;3005433;3005433;3005433;3005433;3005433;3006959;3006959;3006959;3008897;3007010;3006959;3006959;3006959;3006959;3009533;3012276;3012276;3012276;3012276;3012276;3012276…	-;-;-;-;-;-;-;-;-;-;-;-;-;-;-;-;-;-;-;-;-;-;-;-;-;-;-;-;-;-;-;-;-;-;-;-;-;-;-;-;-;-;-;-;-;-;-;-;-;-;-;-;-;-;-;-;-;-;-;-;-;-;-;-;-;-;-;-;-;-;-;-;-;-;-;-;-;-;-;-;-;-;-;-;-;-;-;-;-;-;-;-;-;-;-;-;-;-;-;-;-;-;-;-;-;-;-;-;-;-;-;-;-;-;-;-;-;-;-;-;-;-;-;-;-;-;-;-	10037	14.2252	14.5185	11.1807	10.8331	4.28612e-13	2.95859e-11	0.402593
USP31	16;16;16;16;16;16;16;16;16;16;16;16;16;16;16;16;16;16;16;16;16;16;16	23061406;23067979;23072045;23072045;23073722;23078979;23079946;23082438;23082438;23084860;23084860;23085585;23085585;23087092;23087092;23087724;23090624;23102319;23105441;23106213;23106399;23108046;23148638	23069616;23069616;23072548;23072197;23073880;23080171;23080171;23082557;23082557;23084989;23084989;23085662;23085662;23087130;23087186;23087835;23090804;23102463;23105576;23106305;23106487;23108183;23149270	-;-;-;-;-;-;-;-;-;-;-;-;-;-;-;-;-;-;-;-;-;-;-	12017	3.75361	4.07604	2.47671	2.44493	4.78828e-13	3.29026e-11	0.687439
MMP14	14;14;14;14;14;14;14;14;14;14;14;14;14;14;14;14;14;14;14;14;14;14;14;14;14;14;14;14;14;14	22836557;22836560;22836576;22836620;22837181;22837312;22841491;22841491;22841491;22841491;22841621;22841913;22841913;22841913;22841913;22842410;22842410;22842410;22843257;22843257;22843710;22843710;22844371;22844371;22844630;22844630;22845251;22845251;22845708;22848947	22836925;22836925;22836925;22836925;22837286;22837437;22841639;22841684;22841639;22841639;22841639;22842468;22842035;22842035;22842035;22842593;22842717;22842717;22843418;22843418;22843870;22843870;22844509;22844509;22844780;22844780;22845366;22845366;22847761;22849027	+;+;+;+;+;+;+;+;+;+;+;+;+;+;+;+;+;+;+;+;+;+;+;+;+;+;+;+;+;+	4464	38.5545	39.7593	50.0754	50.3158	5.22361e-13	3.57323e-11	-0.340376
POLE3	9;9;9;9;9;9;9;9;9;9;9;9;9;9;9	113407235;113407235;113407235;113408944;113409610;113409610;113409610;113409610;113410055;113410055;113410055;113410228;113410228;113410228;113410617	113408983;113408983;113408983;113408983;113409728;113410140;113409728;113409728;113410140;113410350;113410140;113410408;113410343;113410382;113410672	-;-;-;-;-;-;-;-;-;-;-;-;-;-;-	2604	95.7262	93.1114	121.557	119.057	5.72055e-13	3.89562e-11	-0.33157
FAM35A	10;10;10;10;10;10;10;10;10;10;10;10;10;10;10;10;10;10;10;10;10;10	87094161;87095196;87095196;87096934;87096934;87096934;87151350;87151350;87151350;87158048;87158048;87170478;87170478;87170840;87170840;87175889;87180075;87180075;87187085;87187085;87190484;87190484	87094788;87095248;87095248;87096989;87096989;87096989;87152879;87151634;87152879;87158155;87158155;87170672;87170672;87170974;87170974;87176095;87180303;87180303;87187200;87187200;87191468;87191463	+;+;+;+;+;+;+;+;+;+;+;+;+;+;+;+;+;+;+;+;+;+	4242	8.36097	8.47055	13.3393	12.9103	5.80911e-13	3.93826e-11	-0.623278
IL32	16;16;16;16;16;16;16;16;16;16;16;16;16;16;16;16;16;16;16;16;16;16;16;16;16;16;16;16;16;16;16;16;16;16;16;16;16;16;16;16;16;16;16;16;16;16;16;16;16;16;16;16;16;16;16;16;16;16;16;16;16;16;16;16;16;16;16;16;16;16;16;16;16;16;16;16;16;16;16;16;16;16;16;16;16;16;16;16;16;16;16;16;16;16;16;16;16;16;16;16;16;16;16;16;16;16;16;16;16;16;16;16;16;16;16;16;16;16;16;16;16;16;16;16;16;16;16;16;16;16;16;16;16;…	3065297;3065312;3065312;3065322;3065322;3065355;3065358;3065369;3065369;3065377;3065380;3065384;3065392;3065404;3065610;3065610;3065614;3065621;3065631;3065631;3065639;3065639;3065640;3065640;3065641;3065642;3065653;3065654;3065662;3065662;3065663;3065677;3065712;3065781;3065781;3065781;3065781;3065781;3065781;3065784;3065784;3065784;3065784;3065784;3065784;3065784;3065784;3065784;3065784;3065784…	3065494;3065494;3065494;3065494;3065494;3065826;3065494;3065494;3065826;3065494;3065494;3065687;3065494;3065494;3065710;3065655;3065655;3065687;3065687;3065655;3065687;3065687;3065826;3065687;3065710;3065687;3065687;3065687;3065826;3065687;3065710;3065710;3065826;3065826;3065826;3065826;3065826;3065826;3065826;3065826;3065826;3065826;3065826;3065826;3065826;3065826;3065826;3065826;3065826;3065826…	+;+;+;+;+;+;+;+;+;+;+;+;+;+;+;+;+;+;+;+;+;+;+;+;+;+;+;+;+;+;+;+;+;+;+;+;+;+;+;+;+;+;+;+;+;+;+;+;+;+;+;+;+;+;+;+;+;+;+;+;+;+;+;+;+;+;+;+;+;+;+;+;+;+;+;+;+;+;+;+;+;+;+;+;+;+;+;+;+;+;+;+;+;+;+;+;+;+;+;+;+;+;+;+;+;+;+;+;+;+;+;+;+;+;+;+;+;+;+;+;+;+;+;+;+;+;+;+	3209	0.977715	1.04489	3.22784	3.06167	5.91819e-13	3.99438e-11	-1.61747
BUB1B	15;15;15;15;15;15;15;15;15;15;15;15;15;15;15;15;15;15;15;15;15;15;15;15;15;15;15;15;15;15;15;15;15;15;15;15;15;15;15;15;15;15;15;15;15;15;15;15;15;15;15;15;15;15;15;15;15;15;15;15;15;15;15;15;15;15;15;15;15;15;15;15;15;15;15;15;15;15;15;15;15;15;15;15	40161023;40161026;40161043;40161067;40161067;40165053;40165053;40165053;40165053;40166359;40170062;40170062;40170062;40170062;40170062;40170537;40170537;40170537;40170537;40170537;40176477;40176477;40176477;40176477;40183714;40183714;40183714;40183724;40185165;40185165;40185165;40185326;40185472;40185551;40185551;40186929;40196545;40196545;40196545;40196545;40196545;40199615;40199615;40199615;401…	40161255;40161255;40161255;40161255;40161255;40165196;40165196;40165196;40165196;40166482;40170121;40170163;40170121;40170121;40170121;40170681;40170599;40170571;40170681;40170681;40176673;40176550;40176673;40176621;40183883;40183883;40183883;40183883;40185481;40185379;40185379;40185642;40185642;40185642;40185642;40187054;40196774;40196734;40196774;40196774;40196774;40199727;40199727;40199727;401…	+;+;+;+;+;+;+;+;+;+;+;+;+;+;+;+;+;+;+;+;+;+;+;+;+;+;+;+;+;+;+;+;+;+;+;+;+;+;+;+;+;+;+;+;+;+;+;+;+;+;+;+;+;+;+;+;+;+;+;+;+;+;+;+;+;+;+;+;+;+;+;+;+;+;+;+;+;+;+;+;+;+;+;+	4476	20.4091	20.3679	28.6187	27.0649	6.06578e-13	4.07588e-11	-0.431736
PRKCB	16;16;16;16;16;16;16;16;16;16;16;16;16;16;16;16;16;16;16;16;16;16;16;16;16;16;16;16;16;16;16;16;16;16;16;16;16;16;16;16;16;16;16;16;16;16;16;16;16;16;16;16;16;16;16;16;16;16;16	23836001;23836024;23836082;23837223;23837375;23837375;23869114;23988508;23988508;24031980;24032136;24032136;24035419;24035419;24035419;24092790;24092791;24092791;24092791;24092791;24094163;24094163;24094163;24094163;24111074;24112973;24112973;24112973;24123835;24123835;24151685;24154684;24154684;24154684;24172176;24172270;24172270;24172270;24174216;24174518;24174518;24174518;24174518;24180790;241…	23836348;23836348;23836348;23837406;23837406;23837406;23869326;23988590;23988590;24032247;24032247;24032247;24035547;24035547;24035547;24092947;24092860;24092947;24092947;24092947;24094297;24094297;24094297;24094297;24111321;24113065;24113069;24113069;24123981;24123981;24151855;24154857;24154857;24154857;24172361;24172361;24172361;24172361;24174580;24174580;24174930;24174580;24174580;24180845;241…	+;+;+;+;+;+;+;+;+;+;+;+;+;+;+;+;+;+;+;+;+;+;+;+;+;+;+;+;+;+;+;+;+;+;+;+;+;+;+;+;+;+;+;+;+;+;+;+;+;+;+;+;+;+;+;+;+;+;+	10037	31.1731	31.1226	24.6778	25.577	6.58471e-13	4.40508e-11	0.327928
CREBL2	12;12;12;12;12;12;12;12	12611827;12611892;12632489;12635777;12635777;12637570;12637570;12641994	12612187;12612187;12632591;12635974;12635974;12637574;12637714;12645108	+;+;+;+;+;+;+;+	3922	3.58248	3.78944	6.52762	7.14366	6.65461e-13	4.43232e-11	-0.872169
SDC2	8;8;8;8;8;8;8;8;8;8;8;8;8;8;8;8;8;8;8;8;8;8;8;8;8;8;8;8;8;8;8;8;8;8;8	96493351;96493813;96493813;96493813;96494008;96529193;96537300;96537300;96538696;96580349;96584945;96586387;96593480;96593480;96593480;96593480;96593480;96602395;96602395;96602395;96602395;96602395;96602395;96608335;96608335;96608335;96608335;96608335;96608335;96609385;96609385;96609385;96609385;96609385;96609385	96494331;96494335;96494331;96494043;96494043;96529271;96537425;96537343;96538816;96580568;96585013;96586544;96593591;96593591;96593591;96593591;96593591;96602528;96602528;96602528;96602528;96602528;96602528;96608470;96608470;96608470;96608470;96608470;96608470;96609465;96610100;96609440;96610174;96609643;96611780	+;+;+;+;+;+;+;+;+;+;+;+;+;+;+;+;+;+;+;+;+;+;+;+;+;+;+;+;+;+;+;+;+;+;+	4536	22.0939	22.6857	30.8029	29.4636	6.92233e-13	4.5905e-11	-0.410753
IDH1	2;2;2;2;2;2;2;2;2;2;2;2;2;2;2;2;2;2;2;2;2;2;2;2;2;2;2;2;2;2;2;2;2;2;2;2;2;2;2;2;2;2;2;2;2;2;2;2;2;2;2;2;2;2;2	208236227;208236232;208236265;208236742;208239071;208239071;208239071;208239071;208239863;208239863;208239863;208239863;208241994;208241994;208241994;208243427;208243427;208243427;208245319;208245319;208245319;208245367;208247382;208248369;208248369;208248369;208248369;208248562;208248597;208251261;208251430;208251430;208251430;208251430;208251430;208251430;208251430;208253886;208253886;208253886…	208237169;208237169;208237169;208237169;208239233;208239233;208239233;208239233;208240315;208240003;208240003;208240003;208242145;208242145;208242145;208243604;208243604;208243604;208245424;208245424;208245424;208245424;208248660;208248660;208248660;208248660;208248660;208248660;208248660;208251567;208251567;208251567;208251567;208251567;208251567;208251567;208251567;208253959;208253959;208253959…	-;-;-;-;-;-;-;-;-;-;-;-;-;-;-;-;-;-;-;-;-;-;-;-;-;-;-;-;-;-;-;-;-;-;-;-;-;-;-;-;-;-;-;-;-;-;-;-;-;-;-;-;-;-;-	4721	21.7097	22.6126	16.4506	16.3601	7.29894e-13	4.8192e-11	0.451689
MCL1	1;1;1;1;1;1;1;1;1;1;1	150574551;150574556;150576927;150577070;150578244;150578244;150578244;150578843;150578843;150578843;150579423	150577491;150577491;150577491;150577491;150578777;150578491;150578491;150579590;150579530;150578963;150579738	-;-;-;-;-;-;-;-;-;-;-	4371	57.2052	61.5764	46.6083	47.891	8.1456e-13	5.35494e-11	0.347787
ATP1A1	1;1;1;1;1;1;1;1;1;1;1;1;1;1;1;1;1;1;1;1;1;1;1;1;1;1;1;1;1;1;1;1;1;1;1;1;1;1;1;1;1;1;1;1;1;1;1;1;1;1;1;1;1;1;1;1;1;1;1;1;1;1;1;1;1;1;1;1;1;1;1;1;1;1;1;1;1;1;1;1;1;1;1;1;1;1;1;1;1;1;1;1;1;1;1;1;1	116372668;116373260;116373269;116373867;116382411;116383370;116384014;116384014;116384014;116384014;116384014;116384014;116384783;116384783;116384783;116384783;116384783;116384783;116387288;116387288;116387288;116387288;116387288;116387303;116388131;116388131;116388131;116388131;116388131;116388131;116388638;116388638;116388638;116388638;116388727;116388902;116388902;116388902;116388902;116389439…	116372921;116373523;116373523;116374241;116382593;116383553;116384124;116384124;116384124;116384124;116384124;116384124;116384842;116384842;116386144;116384842;116384842;116384842;116387491;116387491;116387491;116387491;116387491;116387491;116388525;116388244;116388244;116388244;116388155;116388244;116388772;116388663;116388772;116388772;116388772;116389019;116389019;116389019;116389019;116389940…	+;+;+;+;+;+;+;+;+;+;+;+;+;+;+;+;+;+;+;+;+;+;+;+;+;+;+;+;+;+;+;+;+;+;+;+;+;+;+;+;+;+;+;+;+;+;+;+;+;+;+;+;+;+;+;+;+;+;+;+;+;+;+;+;+;+;+;+;+;+;+;+;+;+;+;+;+;+;+;+;+;+;+;+;+;+;+;+;+;+;+;+;+;+;+;+;+	7261	14.5098	15.1767	19.411	20.316	9.46982e-13	6.19865e-11	-0.402244
FARSA	19;19;19;19;19;19;19;19;19;19;19;19;19;19;19;19;19;19;19;19;19;19;19;19;19;19;19;19;19;19;19;19;19;19;19;19;19;19;19;19;19;19;19;19;19;19;19;19;19;19;19;19;19;19;19;19;19;19;19;19;19;19;19;19;19;19;19;19;19;19;19;19;19;19;19;19;19;19;19;19;19;19;19;19;19;19;19;19;19;19;19;19;19;19	12922479;12922480;12922480;12922530;12922540;12922545;12924151;12924151;12924151;12924151;12924151;12924151;12924449;12924449;12924449;12924449;12924449;12924449;12924639;12924639;12924639;12924639;12924639;12924639;12924681;12924904;12924904;12924904;12924904;12924904;12924904;12925090;12925090;12925090;12925090;12925090;12925090;12925090;12928342;12928342;12928342;12928342;12928342;12928342;129…	12922886;12922886;12922886;12922886;12922886;12922648;12924265;12924265;12924265;12924265;12924265;12924265;12924526;12924526;12924526;12924526;12924526;12924526;12924807;12925003;12924807;12924807;12924807;12924807;12924807;12925003;12925003;12925003;12925003;12925003;12925003;12925174;12925174;12925174;12925174;12925174;12925174;12925174;12928457;12928439;12928457;12928457;12928457;12928457;129…	-;-;-;-;-;-;-;-;-;-;-;-;-;-;-;-;-;-;-;-;-;-;-;-;-;-;-;-;-;-;-;-;-;-;-;-;-;-;-;-;-;-;-;-;-;-;-;-;-;-;-;-;-;-;-;-;-;-;-;-;-;-;-;-;-;-;-;-;-;-;-;-;-;-;-;-;-;-;-;-;-;-;-;-;-;-;-;-;-;-;-;-;-;-	2435	83.8083	82.7331	109.077	103.922	9.58984e-13	6.25027e-11	-0.337081
CLIC1	6;6;6;6;6;6;6;6;6;6;6;6;6;6;6;6;6;6;6;6;6;6;6;6;6;6;6;6;6;6;6;6;6;6;6	31730581;31730581;31730581;31730581;31730583;31732217;31732217;31732217;31732217;31732217;31733566;31733566;31733566;31733566;31733566;31733836;31733836;31733836;31733836;31733836;31734154;31734154;31734154;31734154;31734154;31736262;31736262;31736262;31736262;31736262;31736483;31736545;31736796;31739264;31739729	31731003;31731003;31731003;31731003;31731003;31732398;31732398;31732398;31732398;31732398;31733672;31733672;31733672;31733672;31733672;31733961;31733961;31733961;31733961;31733961;31734263;31734263;31734263;31734263;31734263;31736350;31736350;31736350;31736412;31736567;31736545;31736572;31737318;31739388;31739763	-;-;-;-;-;-;-;-;-;-;-;-;-;-;-;-;-;-;-;-;-;-;-;-;-;-;-;-;-;-;-;-;-;-;-	1942	146.176	142.654	117.04	116.24	9.81244e-13	6.36802e-11	0.326173
AKT3	1;1;1;1;1;1;1;1;1;1;1;1;1;1;1;1;1;1;1;1;1;1;1;1;1;1;1;1;1;1;1;1;1;1;1;1;1;1;1;1;1;1;1;1;1;1;1;1;1;1;1;1;1;1;1;1;1;1;1;1;1;1;1;1;1;1;1;1;1;1;1;1;1;1;1;1;1;1	243488233;243499719;243499720;243499737;243501763;243512324;243512324;243512324;243512324;243545510;243545510;243545510;243545510;243552729;243552729;243552729;243552729;243563720;243563720;243563720;243563720;243572926;243572926;243572926;243572926;243612483;243613671;243613671;243613671;243613671;243613671;243615096;243615096;243615096;243615096;243615096;243637611;243637611;243637611;243637611…	243488450;243499786;243505334;243499786;243505334;243512426;243512426;243512426;243512426;243545597;243545597;243545597;243545597;243552943;243552943;243552943;243552943;243563848;243563848;243563848;243563848;243573048;243573048;243573048;243573048;243613034;243613739;243613739;243613739;243613739;243613739;243615146;243615161;243615161;243615161;243615161;243637742;243637742;243637742;243637742…	-;-;-;-;-;-;-;-;-;-;-;-;-;-;-;-;-;-;-;-;-;-;-;-;-;-;-;-;-;-;-;-;-;-;-;-;-;-;-;-;-;-;-;-;-;-;-;-;-;-;-;-;-;-;-;-;-;-;-;-;-;-;-;-;-;-;-;-;-;-;-;-;-;-;-;-;-;-	9475	9.83802	10.2961	7.16552	7.5165	1.01041e-12	6.52938e-11	0.473702
DRAM1	12;12;12;12;12;12;12;12;12;12;12;12;12;12;12;12;12;12;12;12;12;12;12;12;12;12;12;12;12	101877351;101877683;101877691;101877797;101890088;101897863;101897863;101897863;101897863;101897894;101901291;101901291;101901291;101901291;101901291;101908186;101908186;101908314;101914174;101914174;101914174;101920019;101920109;101920109;101921216;101921216;101921216;101921216;102011813	101877920;101877920;101877920;101877920;101890221;101897930;101897930;101897930;101897930;101897930;101901433;101901552;101901433;101901433;101901433;101908327;101908363;101908363;101914232;101914232;101914232;101920201;101920201;101920201;101921567;101921814;101921542;101923623;102012130	+;+;+;+;+;+;+;+;+;+;+;+;+;+;+;+;+;+;+;+;+;+;+;+;+;+;+;+;+	4180	2.42584	2.61246	5.22657	4.80213	1.05773e-12	6.8062e-11	-0.975471
IRF7	11;11;11;11;11;11;11;11;11;11;11;11;11;11;11;11;11;11;11;11;11;11;11;11;11;11;11;11;11;11;11;11;11;11;11;11;11;11;11;11;11;11;11;11;11;11;11;11;11;11;11;11;11;11;11;11;11;11;11;11;11;11;11;11;11;11;11;11;11;11;11;11;11;11;11;11;11;11;11;11;11;11;11;11;11;11;11;11;11;11;11;11;11;11;11;11;11;11;11;11;11;11;11;11;11;11;11;11	612553;612555;612555;612559;612561;612576;612583;612583;612588;612591;612591;612999;612999;612999;612999;612999;612999;612999;612999;612999;612999;612999;613206;613206;613206;613206;613206;613206;613206;613206;613206;613329;613553;613785;613785;613785;613785;613785;613785;613785;613785;613785;613785;613785;613822;613951;613951;613951;613951;613951;613951;614009;614090;614174;614174;614174;614174;…	612800;612800;612800;612800;612800;612800;612800;612800;612800;612800;612800;613117;613591;613117;613117;613117;613132;613117;613117;613117;613117;613117;613595;613595;613595;613595;613595;613595;613595;613595;613595;613595;613595;613865;614397;613865;613854;613865;613865;614037;613865;613865;613865;613865;613865;614037;614037;614037;614037;614037;614037;614534;614399;614399;614399;614399;614399;…	-;-;-;-;-;-;-;-;-;-;-;-;-;-;-;-;-;-;-;-;-;-;-;-;-;-;-;-;-;-;-;-;-;-;-;-;-;-;-;-;-;-;-;-;-;-;-;-;-;-;-;-;-;-;-;-;-;-;-;-;-;-;-;-;-;-;-;-;-;-;-;-;-;-;-;-;-;-;-;-;-;-;-;-;-;-;-;-;-;-;-;-;-;-;-;-;-;-;-;-;-;-;-;-;-;-;-;-	2628	3.80654	3.67251	1.30808	1.19848	1.07537e-12	6.89055e-11	1.5925
NRBP1	2;2;2;2;2;2;2;2;2;2;2;2;2;2;2;2;2;2;2;2;2;2;2;2;2;2;2;2;2;2;2;2;2;2;2;2;2;2;2;2;2;2;2;2;2;2;2;2;2;2;2;2;2;2;2;2;2;2;2;2;2;2;2;2;2;2;2;2;2;2;2;2;2;2;2;2;2;2;2;2;2;2;2;2;2;2	27427790;27428318;27428640;27428653;27429183;27431677;27433249;27433249;27433249;27433254;27433254;27433673;27433673;27433673;27433673;27433673;27433989;27433989;27433989;27433989;27434045;27434471;27434471;27434471;27434471;27434471;27434471;27434722;27434722;27434722;27434722;27434722;27435133;27435133;27435133;27435133;27435582;27435723;27435723;27436753;27436753;27436753;27437047;27437047;274…	27428182;27428731;27428731;27428731;27429366;27431991;27433483;27433483;27433483;27433483;27433483;27433795;27433707;27433795;27433795;27433795;27434090;27434090;27434090;27434090;27434090;27434560;27434500;27434560;27434560;27434560;27434560;27435169;27434762;27434762;27434762;27434762;27435227;27435227;27435227;27435227;27436836;27436011;27435746;27436836;27436836;27436836;27437105;27437105;274…	+;+;+;+;+;+;+;+;+;+;+;+;+;+;+;+;+;+;+;+;+;+;+;+;+;+;+;+;+;+;+;+;+;+;+;+;+;+;+;+;+;+;+;+;+;+;+;+;+;+;+;+;+;+;+;+;+;+;+;+;+;+;+;+;+;+;+;+;+;+;+;+;+;+;+;+;+;+;+;+;+;+;+;+;+;+	5329	35.9398	34.7	28.1798	27.6021	1.10173e-12	7.02976e-11	0.35864
PLEC	8;8;8;8;8;8;8;8;8;8;8;8;8;8;8;8;8;8;8;8;8;8;8;8;8;8;8;8;8;8;8;8;8;8;8;8;8;8;8;8;8;8;8;8;8;8;8;8;8;8;8;8;8;8;8;8;8;8;8;8;8;8;8;8;8;8;8;8;8;8;8;8;8;8;8;8;8;8;8;8;8;8;8;8;8;8;8;8;8;8;8;8;8;8;8;8;8;8;8;8;8;8;8;8;8;8;8;8;8;8;8;8;8;8;8;8;8;8;8;8;8;8;8;8;8;8;8;8;8;8;8;8;8;8;8;8;8;8;8;8;8;8;8;8;8;8;8;8;8;8;8;8;8;8;8;8;8;8;8;8;8;8;8;8;8;8;8;8;8;8;8;8;8;8;8;8;8;8;8;8;8;8;8;8;8;8;8;8;8;8;8;8;8;8;8;8;8;8;8;8…	143915147;143915153;143915153;143915153;143915153;143915153;143915153;143915153;143916177;143921932;143922504;143922504;143922504;143922504;143922504;143922504;143922504;143922504;143922504;143926784;143926784;143926784;143926784;143926784;143926784;143926784;143926784;143926784;143926784;143926977;143926977;143926977;143926977;143926977;143926977;143926977;143926977;143926977;143926977;143927252…	143922395;143922395;143922395;143922395;143922395;143922395;143922395;143922395;143922395;143922395;143925884;143925884;143925884;143925884;143925884;143925884;143925884;143925884;143925884;143926882;143926882;143926882;143926882;143926882;143926882;143926882;143926882;143926882;143926882;143927011;143927081;143927081;143927081;143927081;143927081;143927081;143927081;143927081;143927081;143927335…	-;-;-;-;-;-;-;-;-;-;-;-;-;-;-;-;-;-;-;-;-;-;-;-;-;-;-;-;-;-;-;-;-;-;-;-;-;-;-;-;-;-;-;-;-;-;-;-;-;-;-;-;-;-;-;-;-;-;-;-;-;-;-;-;-;-;-;-;-;-;-;-;-;-;-;-;-;-;-;-;-;-;-;-;-;-;-;-;-;-;-;-;-;-;-;-;-;-;-;-;-;-;-;-;-;-;-;-;-;-;-;-;-;-;-;-;-;-;-;-;-;-;-;-;-;-;-;-	16991	60.3263	63.1098	50.4764	50.4066	1.13308e-12	7.19956e-11	0.308904
B3GNT2	2;2;2;2	62196113;62215518;62222212;62222212	62196355;62215615;62224549;62224731	+;+;+;+	2861	6.03947	5.76491	10.4187	10.3351	1.14557e-12	7.24857e-11	-0.795939
CHMP4B	20;20;20;20;20	33811304;33848467;33850952;33852077;33853496	33811658;33848644;33851066;33852203;33854366	+;+;+;+;+	1646	99.5883	107.03	141.494	131.945	1.16544e-12	7.34373e-11	-0.38664
ITGAM	16;16;16;16;16;16;16;16;16;16;16;16;16;16;16;16;16;16;16;16;16;16;16;16;16;16;16;16;16;16;16;16;16;16;16;16;16;16;16;16;16;16;16;16;16;16;16;16;16;16;16;16;16;16;16;16;16;16;16;16;16;16;16;16;16;16;16;16;16;16;16;16;16;16;16;16;16;16;16;16	31259990;31259994;31261692;31261692;31265395;31265395;31265811;31265811;31266030;31266030;31270954;31270954;31271847;31271847;31271885;31273365;31273365;31273365;31275549;31275549;31275592;31276671;31276671;31276671;31276920;31276920;31276920;31277967;31277967;31297514;31297514;31297514;31297742;31297745;31321241;31321241;31321464;31321464;31324399;31324399;31324399;31324651;31324651;31324678;313…	31260092;31260092;31261797;31261797;31265498;31265498;31265881;31265881;31266147;31266147;31271084;31271084;31271992;31271992;31271992;31273684;31273518;31273518;31275699;31275699;31275699;31276744;31276744;31276744;31277049;31277049;31277049;31278109;31278109;31297654;31297654;31297654;31297954;31297954;31321371;31321371;31321627;31321627;31324439;31324553;31324553;31324782;31324782;31324782;313…	+;+;+;+;+;+;+;+;+;+;+;+;+;+;+;+;+;+;+;+;+;+;+;+;+;+;+;+;+;+;+;+;+;+;+;+;+;+;+;+;+;+;+;+;+;+;+;+;+;+;+;+;+;+;+;+;+;+;+;+;+;+;+;+;+;+;+;+;+;+;+;+;+;+;+;+;+;+;+;+	5665	12.7463	12.5577	9.03044	8.64669	1.20098e-12	7.5364e-11	0.535153
FRY	13;13;13;13;13;13;13;13;13;13;13;13;13;13;13;13;13;13;13;13;13;13;13;13;13;13;13;13;13;13;13;13;13;13;13;13;13;13;13;13;13;13;13;13;13;13;13;13;13;13;13;13;13;13;13;13;13;13;13;13;13;13;13;13;13;13;13;13;13;13;13;13;13;13;13;13;13;13;13;13;13;13;13;13;13;13;13;13;13;13;13;13;13;13;13;13;13;13;13;13;13;13;13;13;13;13;13;13;13;13;13;13;13;13;13;13;13;13;13;13;13;13;13;13;13;13;13;13;13;13;13;13;13;…	32031300;32031300;32031555;32038430;32060864;32078834;32078834;32078834;32101963;32101963;32101963;32117334;32117334;32117334;32124286;32124286;32124602;32124602;32124795;32124795;32131672;32131672;32134904;32134904;32135085;32135085;32136871;32136871;32147282;32147282;32147839;32147839;32149748;32149748;32155491;32155491;32157273;32157273;32161144;32161144;32171012;32171012;32173367;32173367;321…	32031865;32031865;32031865;32038620;32061163;32079033;32079033;32079033;32102016;32102016;32102016;32117470;32117473;32117473;32124376;32124376;32124681;32124681;32124875;32124875;32131840;32131840;32134996;32134996;32135183;32135183;32136972;32136972;32147385;32147385;32147947;32147947;32149834;32149834;32155662;32155662;32157405;32157405;32161251;32161251;32171270;32171270;32173549;32173549;321…	+;+;+;+;+;+;+;+;+;+;+;+;+;+;+;+;+;+;+;+;+;+;+;+;+;+;+;+;+;+;+;+;+;+;+;+;+;+;+;+;+;+;+;+;+;+;+;+;+;+;+;+;+;+;+;+;+;+;+;+;+;+;+;+;+;+;+;+;+;+;+;+;+;+;+;+;+;+;+;+;+;+;+;+;+;+;+;+;+;+;+;+;+;+;+;+;+;+;+;+;+;+;+;+;+;+;+;+;+;+;+;+;+;+;+;+;+;+;+;+;+;+;+;+;+;+;+;+	18452	4.76345	5.2428	3.53237	3.65842	1.23654e-12	7.72764e-11	0.494621
C9orf78	9;9;9;9;9;9;9;9;9;9;9;9;9;9;9;9;9;9;9;9;9;9;9;9;9;9;9;9;9;9;9;9;9;9;9;9;9	129827290;129827968;129828428;129828442;129829205;129829205;129829279;129829405;129829405;129829405;129829405;129829405;129830871;129830871;129830871;129830871;129830935;129831410;129831896;129831896;129831896;129831896;129831896;129833447;129833447;129833447;129833447;129833447;129833658;129833658;129833658;129834707;129834712;129835139;129835139;129835139;129835788	129828252;129828252;129829303;129829303;129829303;129829303;129829303;129830685;129829541;129829541;129829541;129829541;129831068;129831068;129830961;129831068;129831068;129831732;129831973;129831973;129831973;129831973;129831973;129833517;129833517;129833517;129834547;129833517;129833709;129833709;129833709;129834766;129834766;129835281;129835254;129835275;129835863	-;-;-;-;-;-;-;-;-;-;-;-;-;-;-;-;-;-;-;-;-;-;-;-;-;-;-;-;-;-;-;-;-;-;-;-;-	5099	48.7525	50.128	62.5566	62.0642	1.28053e-12	7.96973e-11	-0.315902
CD244	1;1;1;1;1;1;1;1;1;1;1;1;1;1;1;1;1;1;1;1;1;1;1;1;1;1;1;1;1;1;1;1;1;1;1;1;1;1;1	160830160;160831183;160831271;160831271;160832519;160832519;160832519;160832519;160832519;160834051;160834051;160834051;160834051;160834051;160836195;160836195;160836195;160836195;160838451;160838451;160838451;160838451;160838451;160838820;160838939;160838939;160838939;160838939;160841210;160841210;160841210;160841584;160841584;160841584;160841584;160862617;160862617;160862617;160862617	160831427;160831427;160831427;160831427;160832575;160832575;160832719;160832575;160832575;160834116;160834116;160834116;160834116;160834116;160836254;160836254;160836254;160836254;160838518;160838518;160838518;160838518;160838518;160839165;160839049;160839049;160839049;160839049;160841485;160841500;160841485;160841901;160841901;160841901;160841901;160862700;160862700;160862760;160862855	-;-;-;-;-;-;-;-;-;-;-;-;-;-;-;-;-;-;-;-;-;-;-;-;-;-;-;-;-;-;-;-;-;-;-;-;-;-;-	2857	11.507	11.9425	7.1719	6.89423	1.30115e-12	8.06503e-11	0.754744
LMAN1	18;18;18;18;18;18;18;18;18;18;18;18;18;18;18;18;18;18;18;18;18;18;18;18;18;18	59327823;59330776;59331418;59331418;59331463;59333091;59333091;59338557;59338760;59345919;59345971;59347513;59347513;59349113;59349113;59351412;59352681;59353202;59354519;59354519;59355313;59355313;59355504;59355504;59359031;59359031	59331129;59331129;59331639;59331539;59331539;59333691;59333244;59338627;59338953;59346051;59346051;59347571;59347571;59349236;59349236;59351589;59353301;59353301;59354580;59354580;59355420;59355420;59355658;59355658;59359265;59359962	-;-;-;-;-;-;-;-;-;-;-;-;-;-;-;-;-;-;-;-;-;-;-;-;-;-	6767	10.6638	11.0684	14.9392	15.1093	1.31112e-12	8.09378e-11	-0.449476
CES1	16;16;16;16;16;16;16;16;16;16;16;16;16;16;16;16;16;16;16;16;16;16;16;16;16;16;16;16;16;16;16;16;16;16;16;16;16;16;16;16;16;16;16;16;16;16;16;16;16;16;16;16;16;16;16;16;16;16;16;16;16;16;16;16;16;16;16;16	55802851;55802853;55802854;55802936;55803049;55803529;55803529;55803529;55803529;55803529;55806333;55806333;55806333;55806333;55810517;55810517;55810517;55810517;55810571;55810927;55810927;55810927;55810927;55812336;55812903;55812903;55812903;55812903;55812903;55816924;55816924;55816924;55816924;55819535;55819535;55819535;55819535;55820004;55820329;55820372;55820372;55820372;55821368;55821368;558…	55803232;55803232;55803232;55803232;55803232;55803601;55803601;55803601;55803601;55803601;55806464;55806464;55806464;55806464;55810664;55810655;55810664;55810664;55810664;55811010;55811010;55811007;55811010;55812430;55813043;55813043;55813043;55812974;55813043;55816962;55816962;55816962;55816962;55819580;55819639;55819639;55819639;55820479;55820479;55820479;55820479;55820479;55821521;55821521;558…	-;-;-;-;-;-;-;-;-;-;-;-;-;-;-;-;-;-;-;-;-;-;-;-;-;-;-;-;-;-;-;-;-;-;-;-;-;-;-;-;-;-;-;-;-;-;-;-;-;-;-;-;-;-;-;-;-;-;-;-;-;-;-;-;-;-;-;-	2937	97.3822	97.5502	79.1137	79.4369	1.42099e-12	8.73653e-11	0.315999
EFCAB2	1;1;1;1;1;1;1;1;1;1;1;1;1;1;1;1;1;1;1;1;1;1;1;1;1;1;1;1;1;1;1;1;1;1;1;1;1;1;1;1;1;1;1;1;1;1;1;1;1;1;1;1;1;1;1;1;1;1;1;1;1;1;1;1;1;1;1;1;1;1;1;1;1;1;1;1;1;1;1;1;1;1;1;1;1;1;1;1;1;1;1	244969705;244969739;244969869;244969982;244970286;244970327;244970329;244970329;244970351;244970356;244970390;244970405;244970423;245002121;245002121;245002121;245002153;245017242;245017242;245017242;245017242;245017242;245017242;245017242;245017242;245017242;245030655;245059386;245059386;245059386;245059386;245059386;245059386;245059386;245059386;245059386;245059386;245059386;245059386;245075574…	244969798;244970043;244970043;244970443;244970443;244970443;244970496;244970443;244970443;244970443;244970443;244970443;244970443;245002232;245002232;245002232;245002232;245017326;245017326;245017326;245017326;245017326;245017326;245017326;245017326;245017326;245030831;245059458;245059458;245059458;245059458;245059458;245059458;245059458;245059458;245059458;245059458;245059458;245059458;245075611…	+;+;+;+;+;+;+;+;+;+;+;+;+;+;+;+;+;+;+;+;+;+;+;+;+;+;+;+;+;+;+;+;+;+;+;+;+;+;+;+;+;+;+;+;+;+;+;+;+;+;+;+;+;+;+;+;+;+;+;+;+;+;+;+;+;+;+;+;+;+;+;+;+;+;+;+;+;+;+;+;+;+;+;+;+;+;+;+;+;+;+	8607	23.763	24.5063	19.6704	18.9194	1.52307e-12	9.32636e-11	0.340621
ANKLE1	19;19;19;19;19;19;19;19;19;19;19;19;19;19;19;19;19;19;19;19;19;19;19;19;19;19;19;19;19;19;19;19;19;19;19;19;19;19;19;19;19;19;19;19;19;19;19;19;19;19;19;19;19;19;19;19;19;19;19	17281645;17281645;17281663;17281699;17281699;17281877;17281919;17282049;17282057;17282057;17282057;17282057;17282057;17282062;17282094;17282656;17282656;17282656;17282656;17282656;17282656;17282656;17282656;17282656;17282864;17282864;17282864;17282864;17282864;17282864;17282864;17283225;17283225;17283225;17283225;17283225;17283225;17284089;17284089;17284089;17284089;17284089;17285431;17285431;172…	17281982;17281982;17282209;17281982;17281982;17281949;17281982;17282209;17282209;17282209;17282209;17282209;17282209;17282209;17282209;17282761;17282761;17283048;17283002;17282761;17282761;17282761;17282761;17282761;17283177;17283002;17283002;17283002;17282875;17283002;17283002;17283884;17283962;17283884;17283884;17283962;17283884;17284266;17284266;17284266;17284266;17284266;17285590;17285590;172…	+;+;+;+;+;+;+;+;+;+;+;+;+;+;+;+;+;+;+;+;+;+;+;+;+;+;+;+;+;+;+;+;+;+;+;+;+;+;+;+;+;+;+;+;+;+;+;+;+;+;+;+;+;+;+;+;+;+;+	3569	9.36427	9.11563	14.1944	14.7126	1.61013e-12	9.81984e-11	-0.6272
TCEA1	8;8;8;8;8;8;8;8;8;8;8;8;8;8;8;8;8;8;8;8;8;8;8;8;8;8;8;8;8;8;8;8;8;8;8;8;8;8;8;8;8;8;8;8;8;8;8;8;8;8;8;8;8;8;8;8;8;8;8;8;8;8;8;8;8;8;8;8	53966552;53966556;53966560;53967170;53970264;53970392;53970392;53970392;53970392;53978523;53979025;53979025;53979025;53979025;53984363;53984363;53984363;53986960;53986969;53986969;53986969;53988114;53988114;53988114;53988114;53993376;53993657;53993668;53993668;53993668;53993668;53993695;53993704;53999625;53999945;53999945;53999945;53999945;53999945;53999945;53999945;53999945;54000010;54002892;540…	53968112;53968112;53968112;53968112;53970463;53970463;53970463;53970463;53970463;53978697;53979171;53979171;53979171;53979171;53984517;53984517;53984517;53987025;53987025;53987025;53987025;53988259;53988259;53988259;53988259;53993755;53993755;53993755;53993755;53993755;53993755;53993755;53993755;54000050;54000050;54000050;54000050;54000050;54000050;54000050;54000050;54000050;54000050;54003086;540…	-;-;-;-;-;-;-;-;-;-;-;-;-;-;-;-;-;-;-;-;-;-;-;-;-;-;-;-;-;-;-;-;-;-;-;-;-;-;-;-;-;-;-;-;-;-;-;-;-;-;-;-;-;-;-;-;-;-;-;-;-;-;-;-;-;-;-;-	4391	71.4941	72.2034	58.6234	58.3894	1.66166e-12	1.00936e-10	0.314295
PHF20L1	8;8;8;8;8;8;8;8;8;8;8;8;8;8;8;8;8;8;8;8;8;8;8;8;8;8;8;8;8;8;8;8;8;8;8;8;8;8;8;8;8;8;8;8;8;8;8;8;8;8;8;8;8;8;8;8;8;8;8;8;8;8;8;8;8;8;8;8;8;8;8;8;8;8;8;8;8;8;8;8;8;8;8;8;8;8;8;8;8;8;8;8;8;8;8;8;8;8;8;8;8;8;8;8;8;8;8;8;8;8;8;8;8;8;8;8;8;8;8;8;8;8;8;8;8;8;8;8;8;8;8;8;8;8;8;8;8;8;8;8;8;8;8;8;8;8;8;8;8;8;8;8;8;8;8;8;8;8;8;8;8;8;8;8;8;8;8;8;8;8;8;8;8;8;8;8;8;8;8;8;8;8;8;8;8;8;8;8;8;8;8;8;8;8;8;8;8;8	132775358;132775358;132775372;132775375;132775375;132775384;132775398;132775400;132775408;132775580;132777789;132777792;132777792;132777792;132777792;132777792;132777792;132777796;132777796;132777796;132777796;132777796;132777823;132788804;132794410;132794410;132794410;132794410;132794410;132794410;132794410;132794410;132794410;132794410;132794410;132794410;132794410;132794733;132794733;132794733…	132775645;132775645;132775645;132775645;132775645;132775645;132775645;132775645;132775645;132775645;132777911;132777911;132777911;132777911;132777911;132777911;132777911;132777911;132777911;132777911;132777911;132777911;132777911;132788999;132794581;132794581;132794581;132794581;132794581;132794581;132794581;132794581;132794581;132794581;132794581;132794581;132794581;132794817;132794817;132794817…	+;+;+;+;+;+;+;+;+;+;+;+;+;+;+;+;+;+;+;+;+;+;+;+;+;+;+;+;+;+;+;+;+;+;+;+;+;+;+;+;+;+;+;+;+;+;+;+;+;+;+;+;+;+;+;+;+;+;+;+;+;+;+;+;+;+;+;+;+;+;+;+;+;+;+;+;+;+;+;+;+;+;+;+;+;+;+;+;+;+;+;+;+;+;+;+;+;+;+;+;+;+;+;+;+;+;+;+;+;+;+;+;+;+;+;+;+;+;+;+;+;+;+;+;+;+;+;+	20571	5.77586	6.11908	7.68709	7.95711	1.87294e-12	1.13317e-10	-0.377293
MTHFD1	14;14;14;14;14;14;14;14;14;14;14;14;14;14;14;14;14;14;14;14;14;14;14;14;14;14;14;14;14;14;14;14;14;14;14;14;14;14;14;14;14;14;14;14;14;14;14;14;14;14;14;14;14;14;14;14;14;14;14;14;14;14;14;14;14;14;14;14;14;14;14;14;14;14;14;14;14;14;14;14;14;14;14;14;14;14;14;14;14;14;14;14;14;14;14;14;14;14;14;14;14;14;14;14;14;14;14;14;14;14;14;14;14;14;14;14;14;14;14;14;14;14;14;14;14;14;14;14;14;14;14;14;14;…	64388031;64388240;64388308;64388308;64388311;64388350;64388727;64389001;64389001;64390337;64400793;64400793;64400793;64400793;64400793;64400793;64400793;64411090;64411090;64411090;64411090;64411090;64411090;64412472;64412472;64412472;64412472;64412472;64412472;64412472;64415358;64415358;64415358;64415358;64415358;64415358;64415358;64415639;64415639;64415639;64415639;64415639;64417888;64417888;644…	64388468;64388468;64388468;64388468;64388468;64388468;64388827;64389125;64389125;64390467;64400877;64400877;64400877;64400877;64400877;64400877;64400877;64411149;64411149;64411149;64411149;64411149;64411149;64412525;64412525;64412525;64412525;64412525;64412525;64412525;64415494;64415494;64415435;64415494;64415429;64415494;64415494;64415710;64415739;64415739;64415739;64415739;64418024;64418024;644…	+;+;+;+;+;+;+;+;+;+;+;+;+;+;+;+;+;+;+;+;+;+;+;+;+;+;+;+;+;+;+;+;+;+;+;+;+;+;+;+;+;+;+;+;+;+;+;+;+;+;+;+;+;+;+;+;+;+;+;+;+;+;+;+;+;+;+;+;+;+;+;+;+;+;+;+;+;+;+;+;+;+;+;+;+;+;+;+;+;+;+;+;+;+;+;+;+;+;+;+;+;+;+;+;+;+;+;+;+;+;+;+;+;+;+;+;+;+;+;+;+;+;+;+;+;+;+;+	9377	13.9269	14.1342	18.0504	18.3234	1.91804e-12	1.15585e-10	-0.356329
FKBP5	6;6;6;6;6;6;6;6;6;6;6;6;6;6;6;6;6;6;6;6;6;6;6;6;6;6;6;6;6;6;6;6;6;6;6;6;6;6;6;6;6	35573585;35573585;35573590;35576994;35576994;35576994;35580036;35580036;35580036;35580557;35587034;35587034;35587034;35591130;35591130;35591130;35597248;35597248;35597248;35597248;35619096;35619096;35619096;35619096;35620132;35620132;35620132;35620132;35637014;35637014;35637014;35637014;35642720;35642720;35642720;35642720;35688732;35688804;35688804;35720328;35728508	35575942;35575942;35575942;35577233;35577233;35577233;35580221;35580221;35580221;35587117;35587117;35587117;35587117;35591220;35591220;35591220;35597404;35597404;35597404;35597404;35619210;35619210;35619210;35619210;35620274;35620274;35620274;35620274;35637158;35637158;35637158;35637158;35642843;35642843;35642843;35642843;35688915;35688942;35688937;35720548;35728583	-;-;-;-;-;-;-;-;-;-;-;-;-;-;-;-;-;-;-;-;-;-;-;-;-;-;-;-;-;-;-;-;-;-;-;-;-;-;-;-;-	10628	7.24333	7.37997	9.94185	10.0317	1.97052e-12	1.18278e-10	-0.431825
TTN	2;2;2;2;2;2;2;2;2;2;2;2;2;2;2;2;2;2;2;2;2;2;2;2;2;2;2;2;2;2;2;2;2;2;2;2;2;2;2;2;2;2;2;2;2;2;2;2;2;2;2;2;2;2;2;2;2;2;2;2;2;2;2;2;2;2;2;2;2;2;2;2;2;2;2;2;2;2;2;2;2;2;2;2;2;2;2;2;2;2;2;2;2;2;2;2;2;2;2;2;2;2;2;2;2;2;2;2;2;2;2;2;2;2;2;2;2;2;2;2;2;2;2;2;2;2;2;2;2;2;2;2;2;2;2;2;2;2;2;2;2;2;2;2;2;2;2;2;2;2;2;2;2;2;2;2;2;2;2;2;2;2;2;2;2;2;2;2;2;2;2;2;2;2;2;2;2;2;2;2;2;2;2;2;2;2;2;2;2;2;2;2;2;2;2;2;2;2;2;2…	178525989;178525989;178525989;178525989;178527012;178527012;178527012;178527446;178527446;178527446;178527446;178527446;178527446;178527446;178528274;178528274;178528274;178528274;178528274;178528274;178528274;178528528;178528528;178528528;178528528;178528528;178528528;178528528;178529960;178529960;178529960;178529960;178529960;178529960;178529960;178530241;178530241;178530241;178530241;178530241…	178527307;178527307;178527307;178527307;178527307;178527307;178527307;178527748;178527748;178527748;178527748;178527748;178527748;178527748;178528427;178528427;178528427;178528427;178528427;178528427;178528427;178529219;178529219;178529219;178529219;178529219;178529219;178529219;178530116;178530116;178530116;178530116;178530116;178530116;178530116;178535849;178535849;178535849;178535849;178535849…	-;-;-;-;-;-;-;-;-;-;-;-;-;-;-;-;-;-;-;-;-;-;-;-;-;-;-;-;-;-;-;-;-;-;-;-;-;-;-;-;-;-;-;-;-;-;-;-;-;-;-;-;-;-;-;-;-;-;-;-;-;-;-;-;-;-;-;-;-;-;-;-;-;-;-;-;-;-;-;-;-;-;-;-;-;-;-;-;-;-;-;-;-;-;-;-;-;-;-;-;-;-;-;-;-;-;-;-;-;-;-;-;-;-;-;-;-;-;-;-;-;-;-;-;-;-;-;-	118976	0.454036	0.444448	0.296158	0.302658	2.04688e-12	1.22363e-10	0.60344
UBXN4	2;2;2;2;2;2;2;2;2;2;2;2;2;2;2;2;2;2;2;2;2;2;2;2;2;2;2;2;2;2;2;2;2;2;2;2;2;2;2;2;2;2;2;2;2;2	135741619;135741734;135741786;135741868;135742523;135747658;135748111;135748267;135748267;135748267;135748267;135748267;135753539;135753539;135753539;135753539;135754152;135754159;135754159;135754159;135755517;135755517;135755517;135755517;135755517;135761818;135761818;135761818;135769769;135769769;135770571;135770571;135772420;135772420;135772447;135776249;135776249;135776249;135778948;135778948…	135742011;135742011;135742011;135742011;135742753;135747765;135748369;135748369;135748369;135748369;135748369;135748369;135753567;135754277;135753567;135753567;135754277;135754277;135754188;135754277;135755658;135755691;135755691;135755691;135755691;135761911;135761881;135761911;135769823;135769823;135770735;135770735;135772547;135772547;135772547;135776351;135776351;135776351;135779079;135779079…	+;+;+;+;+;+;+;+;+;+;+;+;+;+;+;+;+;+;+;+;+;+;+;+;+;+;+;+;+;+;+;+;+;+;+;+;+;+;+;+;+;+;+;+;+;+	5112	24.043	23.6928	31.358	30.9532	2.06207e-12	1.22363e-10	-0.36646
EEF1A2	20;20;20;20;20;20;20;20;20;20;20;20;20;20;20	63488013;63488013;63488918;63488918;63490479;63490479;63493137;63493137;63494805;63494805;63495856;63495856;63497620;63497620;63499058	63488425;63488425;63489152;63489152;63490735;63490735;63493287;63493287;63495101;63495101;63496035;63496035;63497834;63497834;63499315	-;-;-;-;-;-;-;-;-;-;-;-;-;-;-	2006	21.058	19.132	12.8526	11.6937	2.06275e-12	1.22363e-10	0.728594
NAA15	4;4;4;4;4;4;4;4;4;4;4;4;4;4;4;4;4;4;4;4;4;4;4;4;4;4;4;4;4;4;4;4;4;4;4;4;4;4;4;4;4;4;4;4;4;4;4;4;4;4;4;4;4;4;4;4;4;4;4;4;4;4;4;4	139301455;139301588;139301984;139334174;139334174;139334174;139336848;139336848;139336848;139336873;139340912;139340912;139340912;139340912;139342826;139342826;139342826;139344186;139344186;139344186;139349462;139349462;139349462;139351191;139351191;139351191;139351505;139351505;139351505;139351535;139354026;139354026;139354026;139356489;139357386;139357386;139357386;139359743;139359743;139359743…	139301831;139301831;139302181;139334258;139334258;139334258;139336952;139336952;139336952;139336952;139341073;139341069;139341069;139341069;139342960;139342960;139342960;139344339;139344339;139344339;139349581;139349581;139349581;139351286;139351286;139351286;139351613;139351611;139351611;139351611;139354098;139354098;139354098;139356583;139357555;139357555;139357555;139359857;139359895;139359895…	+;+;+;+;+;+;+;+;+;+;+;+;+;+;+;+;+;+;+;+;+;+;+;+;+;+;+;+;+;+;+;+;+;+;+;+;+;+;+;+;+;+;+;+;+;+;+;+;+;+;+;+;+;+;+;+;+;+;+;+;+;+;+;+	9712	10.1691	10.2268	13.3665	13.7804	2.21475e-12	1.30868e-10	-0.394413
NEAT1	11;11;11;11;11;11;11;11;11;11;11	65422774;65422798;65422800;65423285;65423295;65423627;65423627;65423963;65425580;65426061;65444458	65423383;65445540;65423212;65423383;65423368;65424827;65423657;65424404;65425737;65426385;65444557	+;+;+;+;+;+;+;+;+;+;+	22767	9.54474	10.2238	8.0284	7.80491	2.32084e-12	1.36606e-10	0.337935
MS4A6A	11;11;11;11;11;11;11;11;11;11;11;11;11;11;11;11;11;11;11;11;11;11;11;11;11;11;11;11;11;11;11;11;11;11;11;11;11;11;11;11;11;11;11;11;11;11;11;11;11;11;11;11;11;11;11;11;11;11;11;11;11;11;11;11;11;11;11;11;11;11;11;11;11;11;11;11;11;11;11;11;11;11;11;11;11;11;11;11;11;11;11;11;11;11	60172014;60172015;60172015;60172019;60172020;60172047;60172497;60172500;60172671;60173028;60173028;60173028;60173028;60173028;60173028;60175402;60175402;60175402;60175402;60175402;60175402;60175402;60175506;60175506;60175506;60177019;60177979;60178171;60178260;60178260;60178260;60178260;60178260;60178260;60178260;60178260;60178260;60178260;60178794;60179491;60179491;60179831;60179831;60179831;601…	60173129;60172253;60172253;60172253;60172253;60172253;60173129;60173129;60173129;60173129;60173129;60173129;60173129;60173129;60173129;60175611;60175611;60175611;60175611;60175611;60175611;60175611;60175611;60175611;60175611;60177415;60178316;60178316;60178316;60178316;60178316;60178316;60178316;60178316;60178353;60178316;60178316;60178316;60178828;60179965;60181741;60179965;60179965;60179965;601…	-;-;-;-;-;-;-;-;-;-;-;-;-;-;-;-;-;-;-;-;-;-;-;-;-;-;-;-;-;-;-;-;-;-;-;-;-;-;-;-;-;-;-;-;-;-;-;-;-;-;-;-;-;-;-;-;-;-;-;-;-;-;-;-;-;-;-;-;-;-;-;-;-;-;-;-;-;-;-;-;-;-;-;-;-;-;-;-;-;-;-;-;-;-	5791	9.4852	9.06857	6.14706	6.22621	2.44432e-12	1.43318e-10	0.602528
STRBP	9;9;9;9;9;9;9;9;9;9;9;9;9;9;9;9;9;9;9;9;9;9;9;9;9;9;9;9;9;9;9;9;9;9;9;9;9;9;9;9;9;9;9;9;9;9;9;9;9;9;9;9;9;9;9;9;9;9;9;9;9;9;9;9;9;9;9;9;9;9;9;9;9;9;9;9;9;9;9;9;9;9;9;9;9;9;9;9;9;9;9;9;9;9;9;9	123109500;123109514;123109557;123115764;123115929;123121291;123121631;123122193;123122193;123122193;123124709;123125039;123125220;123128214;123128214;123128214;123128214;123128214;123128214;123128214;123132845;123132845;123132845;123132845;123132845;123132845;123132845;123135807;123136041;123136041;123136041;123136041;123136041;123136381;123136381;123136381;123136381;123136381;123139529;123139529…	123109753;123109753;123109753;123115883;123116098;123121548;123125673;123122326;123122223;123122326;123125673;123125673;123125673;123128258;123128258;123128258;123128258;123128258;123128258;123128258;123132968;123132968;123132968;123132968;123132968;123132967;123132968;123136181;123136181;123136181;123136181;123136136;123136181;123136503;123136515;123136515;123136515;123136515;123139687;123139687…	-;-;-;-;-;-;-;-;-;-;-;-;-;-;-;-;-;-;-;-;-;-;-;-;-;-;-;-;-;-;-;-;-;-;-;-;-;-;-;-;-;-;-;-;-;-;-;-;-;-;-;-;-;-;-;-;-;-;-;-;-;-;-;-;-;-;-;-;-;-;-;-;-;-;-;-;-;-;-;-;-;-;-;-;-;-;-;-;-;-;-;-;-;-;-;-	8097	5.5933	5.02529	8.13361	7.91904	2.48556e-12	1.45176e-10	-0.578192
PPM1A	14;14;14;14;14;14;14;14;14;14;14;14;14;14;14;14;14;14;14;14;14;14;14;14;14;14;14;14;14;14;14;14;14;14;14;14;14;14;14	60245752;60245757;60245785;60249268;60249441;60249660;60250380;60250431;60256762;60267215;60268293;60277005;60277005;60277313;60282684;60282684;60282684;60282684;60282684;60282684;60282684;60282684;60285624;60285624;60285624;60285624;60285624;60289806;60289806;60289806;60289806;60291397;60291397;60291397;60291397;60292453;60292453;60292453;60292453	60246046;60246046;60246046;60249677;60249677;60249677;60250481;60250481;60256866;60267291;60268435;60277091;60277091;60277365;60283266;60283147;60283089;60283537;60282794;60283537;60283537;60283537;60288555;60285741;60285741;60285741;60285741;60289914;60289914;60289914;60289914;60291454;60291454;60291454;60291454;60299087;60293355;60292731;60292482	+;+;+;+;+;+;+;+;+;+;+;+;+;+;+;+;+;+;+;+;+;+;+;+;+;+;+;+;+;+;+;+;+;+;+;+;+;+;+	11860	3.88381	3.69446	5.52624	5.69183	2.5944e-12	1.50952e-10	-0.547658
FABP5	8;8;8;8;8;8;8;8;8;8;8;8	81280363;81280867;81283028;81283326;81283366;81283366;81283873;81283873;81283873;81283873;81284514;81284514	81280674;81281313;81283538;81283538;81283538;81283538;81284415;81283974;81283974;81283940;81284777;81284777	+;+;+;+;+;+;+;+;+;+;+;+	2077	58.891	57.9429	83.1468	75.1195	2.83175e-12	1.64133e-10	-0.420239
IRF8	16;16;16;16;16;16;16;16;16;16;16;16;16;16;16;16;16;16;16;16;16;16;16;16;16;16;16;16;16;16;16;16;16;16;16;16;16;16;16;16;16;16;16;16;16;16;16;16	85898803;85899163;85899188;85900928;85902689;85902815;85902838;85903015;85903015;85903015;85903015;85903015;85903131;85908988;85908990;85908990;85908990;85908990;85908990;85911570;85911570;85911570;85911570;85911570;85913131;85913131;85913131;85913131;85913974;85914043;85914313;85914473;85914473;85914473;85914473;85918417;85918417;85918417;85918417;85918417;85920109;85920109;85920109;85920109;859…	85899223;85899223;85899223;85901246;85903189;85902867;85902889;85903189;85903189;85903156;85903531;85903189;85903189;85909173;85909173;85909173;85909882;85909173;85909173;85911658;85911658;85911658;85911658;85911658;85913312;85913236;85913160;85913236;85914141;85914171;85914520;85914520;85914520;85914520;85914520;85918803;85918489;85918803;85918800;85918803;85920224;85920224;85920224;85920224;859…	+;+;+;+;+;+;+;+;+;+;+;+;+;+;+;+;+;+;+;+;+;+;+;+;+;+;+;+;+;+;+;+;+;+;+;+;+;+;+;+;+;+;+;+;+;+;+;+	5162	149.811	150.076	122.868	122.987	2.95164e-12	1.70432e-10	0.304577
HELLS	10;10;10;10;10;10;10;10;10;10;10;10;10;10;10;10;10;10;10;10;10;10;10;10;10;10;10;10;10;10;10;10;10;10;10;10;10;10;10;10;10;10;10;10;10;10;10;10;10;10;10;10;10;10;10;10;10;10;10;10;10;10;10;10;10;10;10;10;10;10;10;10;10;10;10;10;10;10;10;10;10;10;10;10;10;10;10;10;10;10;10;10;10;10;10;10;10;10;10;10;10;10;10;10;10;10;10;10;10;10;10;10;10;10;10;10;10;10;10;10;10;10;10;10;10;10;10;10;10;10;10;10;10;…	94501434;94501434;94545790;94545816;94545817;94545922;94545922;94546377;94546377;94546377;94546377;94546377;94550972;94550972;94554124;94554126;94554126;94554126;94554126;94554126;94557179;94558139;94558139;94558139;94558139;94558139;94562691;94562691;94562691;94562691;94562691;94562691;94562691;94562812;94562812;94562812;94562812;94562812;94562812;94569195;94570787;94571388;94571388;94571388;945…	94501488;94501488;94545907;94545952;94545952;94545952;94545952;94546498;94546498;94546498;94546498;94546498;94550996;94550996;94554248;94554248;94554248;94554248;94554248;94554248;94557196;94558195;94558195;94558195;94558195;94558195;94562727;94562727;94562727;94562727;94562727;94562727;94562727;94562876;94562876;94562876;94562876;94562876;94562876;94571429;94571280;94571429;94571429;94571429;945…	+;+;+;+;+;+;+;+;+;+;+;+;+;+;+;+;+;+;+;+;+;+;+;+;+;+;+;+;+;+;+;+;+;+;+;+;+;+;+;+;+;+;+;+;+;+;+;+;+;+;+;+;+;+;+;+;+;+;+;+;+;+;+;+;+;+;+;+;+;+;+;+;+;+;+;+;+;+;+;+;+;+;+;+;+;+;+;+;+;+;+;+;+;+;+;+;+;+;+;+;+;+;+;+;+;+;+;+;+;+;+;+;+;+;+;+;+;+;+;+;+;+;+;+;+;+;+;+	10148	7.81446	8.0282	10.947	10.5664	3.13689e-12	1.80443e-10	-0.42363
CCNB1	5;5;5;5;5;5;5;5;5;5;5;5;5;5;5;5;5;5;5;5;5;5;5;5;5;5;5;5;5;5;5;5;5;5;5;5;5;5;5;5;5;5	69167010;69167135;69167216;69167263;69167266;69167908;69167908;69167908;69167908;69167908;69168173;69168173;69168173;69168173;69168173;69171270;69171270;69171270;69171270;69171270;69174251;69174251;69174251;69174251;69174257;69174877;69174877;69174877;69174877;69174877;69175397;69175397;69175397;69175397;69177061;69177239;69177239;69177291;69177524;69177524;69177524;69177524	69167283;69167283;69167283;69167283;69167485;69168078;69168078;69168078;69168078;69168078;69168343;69168343;69168343;69168343;69168343;69171452;69171452;69171452;69171452;69171452;69174255;69174409;69174409;69174409;69174409;69175113;69175113;69175063;69175113;69175113;69175537;69175537;69175537;69175537;69177349;69177358;69177349;69177349;69177700;69177697;69177630;69178245	+;+;+;+;+;+;+;+;+;+;+;+;+;+;+;+;+;+;+;+;+;+;+;+;+;+;+;+;+;+;+;+;+;+;+;+;+;+;+;+;+;+	2558	12.3543	13.7812	20.2112	20.5642	3.17404e-12	1.8189e-10	-0.623682
RAB22A	20;20;20;20;20;20;20;20;20;20;20	58309696;58309758;58311043;58311043;58343718;58343718;58345434;58353273;58353432;58354156;58359606	58310012;58310012;58311122;58311122;58343799;58343799;58346048;58353344;58353538;58354265;58367507	+;+;+;+;+;+;+;+;+;+;+	9285	0.670921	0.717372	1.67093	1.4885	3.41947e-12	1.95218e-10	-1.1686
OAS2	12;12;12;12;12;12;12;12;12;12;12;12;12;12;12;12;12;12;12;12;12;12;12;12;12;12;12;12;12;12;12;12;12;12;12;12;12;12;12;12;12;12;12;12;12;12;12;12	112978395;112978402;112978482;112978540;112978590;112978602;112987038;112987038;112987038;112987038;112987038;112995296;112995296;112995296;112995296;112995296;112997520;112997520;112997520;112997520;112997520;112998245;112998266;112998266;112998266;112998266;112998266;113002932;113002932;113002932;113002932;113002932;113004934;113004934;113004934;113004934;113006413;113006413;113006413;113007705…	112978785;112978785;112978785;112978785;112978785;112978785;112987308;112988805;112987083;112987308;112987308;112995474;112995474;112995474;112995474;112995474;112997755;112997755;112997755;112997755;112997755;112998410;112998410;112998410;112998410;112998410;112998410;113003102;113003102;113002958;113003102;113003102;113005117;113005222;113005222;113005222;113006600;113006600;113006600;113007943…	+;+;+;+;+;+;+;+;+;+;+;+;+;+;+;+;+;+;+;+;+;+;+;+;+;+;+;+;+;+;+;+;+;+;+;+;+;+;+;+;+;+;+;+;+;+;+;+	6264	0.878348	1.04165	0.209408	0.240149	3.5805e-12	2.02962e-10	2.10946
MAP4K4	2;2;2;2;2;2;2;2;2;2;2;2;2;2;2;2;2;2;2;2;2;2;2;2;2;2;2;2;2;2;2;2;2;2;2;2;2;2;2;2;2;2;2;2;2;2;2;2;2;2;2;2;2;2;2;2;2;2;2;2;2;2;2;2;2;2;2;2;2;2;2;2;2;2;2;2;2;2;2;2;2;2;2;2;2;2;2;2;2;2;2;2;2;2;2;2;2;2;2;2;2;2;2;2;2;2;2;2;2;2;2;2;2;2;2;2;2;2;2;2;2;2;2;2;2;2;2;2;2;2;2;2;2;2;2;2;2;2;2;2;2;2;2;2;2;2;2;2;2;2;2;2;2;2;2;2;2;2;2;2;2;2;2;2;2;2;2;2;2;2;2;2;2;2;2;2;2;2;2;2;2;2;2;2;2;2;2;2;2;2;2;2;2;2;2;2;2;2;2;2…	101696850;101697703;101697703;101697703;101697744;101698026;101698026;101698026;101698026;101698076;101698081;101698081;101698081;101698473;101698473;101698473;101698473;101698473;101698473;101698473;101698473;101698473;101698473;101698473;101698473;101698530;101790720;101790720;101790720;101790720;101790720;101790720;101790720;101790720;101790720;101790720;101790720;101790720;101790720;101797234…	101697064;101698137;101698137;101698137;101698137;101698137;101698137;101698137;101698137;101698137;101698137;101698137;101698137;101698538;101698538;101698538;101698538;101698538;101698538;101698538;101698538;101698538;101698538;101698538;101698538;101698538;101790776;101790776;101790776;101790776;101790776;101790776;101790776;101790776;101790776;101790776;101790776;101790776;101790776;101797383…	+;+;+;+;+;+;+;+;+;+;+;+;+;+;+;+;+;+;+;+;+;+;+;+;+;+;+;+;+;+;+;+;+;+;+;+;+;+;+;+;+;+;+;+;+;+;+;+;+;+;+;+;+;+;+;+;+;+;+;+;+;+;+;+;+;+;+;+;+;+;+;+;+;+;+;+;+;+;+;+;+;+;+;+;+;+;+;+;+;+;+;+;+;+;+;+;+;+;+;+;+;+;+;+;+;+;+;+;+;+;+;+;+;+;+;+;+;+;+;+;+;+;+;+;+;+;+;+	11961	19.9926	20.0627	24.9814	25.283	3.58184e-12	2.02962e-10	-0.309554
NCOA4	10;10;10;10;10;10;10;10;10;10;10;10;10;10;10;10;10;10;10;10;10;10;10;10;10;10;10;10;10;10;10;10;10;10;10;10;10;10;10;10;10;10;10;10;10;10;10;10;10;10;10;10;10;10;10;10;10;10;10;10;10;10;10;10;10;10;10;10	46005088;46005091;46006173;46006295;46006378;46006412;46006427;46009124;46009411;46009411;46009411;46009411;46009411;46009411;46009411;46010223;46010223;46010223;46010223;46010223;46010223;46010223;46012883;46012883;46012883;46012883;46012883;46012883;46012883;46013550;46013550;46013550;46013550;46013550;46013550;46013550;46014444;46014444;46014444;46014444;46014444;46014444;46014444;46014854;460…	46006597;46006597;46006597;46006597;46006597;46006597;46006597;46009212;46009551;46009551;46009551;46009551;46009551;46009551;46009551;46011206;46011206;46011206;46011206;46011206;46011206;46011206;46013026;46013026;46013026;46013026;46013026;46013026;46013026;46013639;46013639;46013639;46013639;46013639;46013639;46013639;46014552;46014552;46014552;46014552;46014552;46014552;46014552;46014942;460…	-;-;-;-;-;-;-;-;-;-;-;-;-;-;-;-;-;-;-;-;-;-;-;-;-;-;-;-;-;-;-;-;-;-;-;-;-;-;-;-;-;-;-;-;-;-;-;-;-;-;-;-;-;-;-;-;-;-;-;-;-;-;-;-;-;-;-;-	4079	36.0512	34.6363	27.2346	27.7975	3.66683e-12	2.07006e-10	0.379309
TCOF1	5;5;5;5;5;5;5;5;5;5;5;5;5;5;5;5;5;5;5;5;5;5;5;5;5;5;5;5;5;5;5;5;5;5;5;5;5;5;5;5;5;5;5;5;5;5;5;5;5;5;5;5;5;5;5;5;5;5;5;5;5;5;5;5;5;5;5;5;5;5;5;5;5;5;5;5;5;5;5;5;5;5;5;5;5;5;5;5;5;5;5;5;5;5;5;5;5;5;5;5;5;5;5;5;5;5;5;5;5;5;5;5;5;5;5;5;5;5;5;5;5;5;5;5;5;5;5;5;5;5;5;5;5;5;5;5;5;5;5;5;5;5;5;5;5;5;5;5;5;5;5;5;5;5;5;5;5;5;5;5;5;5;5;5;5;5;5;5;5;5;5;5;5;5;5;5;5;5;5;5;5;5;5;5;5;5;5;5;5;5;5;5;5;5;5;5;5;5;5;5…	150357639;150357666;150357672;150357714;150357718;150357719;150357747;150357747;150357783;150361156;150361156;150361156;150361156;150361156;150361156;150361156;150361156;150361156;150364113;150364113;150364113;150364113;150364113;150364113;150364113;150364113;150364113;150367573;150367844;150367844;150367844;150367844;150367844;150367844;150367844;150367844;150367844;150368716;150368716;150368716…	150357854;150357854;150357854;150357854;150357854;150357854;150357854;150357854;150357854;150361211;150361211;150361211;150361211;150361211;150361211;150361211;150361211;150361211;150364252;150364252;150364252;150364252;150364252;150364252;150364252;150364252;150364252;150368902;150367917;150367917;150367917;150367917;150367917;150367917;150367917;150367917;150367917;150368902;150368902;150368902…	+;+;+;+;+;+;+;+;+;+;+;+;+;+;+;+;+;+;+;+;+;+;+;+;+;+;+;+;+;+;+;+;+;+;+;+;+;+;+;+;+;+;+;+;+;+;+;+;+;+;+;+;+;+;+;+;+;+;+;+;+;+;+;+;+;+;+;+;+;+;+;+;+;+;+;+;+;+;+;+;+;+;+;+;+;+;+;+;+;+;+;+;+;+;+;+;+;+;+;+;+;+;+;+;+;+;+;+;+;+;+;+;+;+;+;+;+;+;+;+;+;+;+;+;+;+;+;+	11278	22.3564	21.7438	28.0625	27.3185	4.03561e-12	2.26981e-10	-0.310613
IRF9	14;14;14;14;14;14;14;14;14;14;14;14;14;14;14;14;14;14;14;14;14;14;14;14;14;14;14;14;14;14;14;14;14;14;14;14;14;14;14;14;14;14;14;14;14;14;14;14;14;14;14;14;14;14;14;14;14;14;14;14;14;14;14;14;14;14;14;14;14;14;14;14;14	24161053;24161273;24161277;24161290;24161290;24161290;24161293;24161301;24161304;24161317;24162144;24162144;24162144;24162144;24162144;24162144;24162144;24162144;24162144;24162966;24162966;24162966;24162966;24162966;24162966;24162966;24162966;24162966;24162996;24163378;24163378;24163378;24163378;24163378;24163378;24163378;24163378;24163378;24163612;24163875;24163878;24163878;24163878;24163878;241…	24161338;24161338;24161338;24161338;24161338;24161338;24161338;24161338;24161338;24161338;24162716;24162280;24162324;24162324;24162324;24162324;24162324;24162280;24162324;24163149;24163149;24163149;24163149;24163281;24163149;24163149;24163149;24163149;24163149;24163765;24163508;24163508;24163508;24163508;24163586;24163508;24163508;24163508;24163959;24164134;24163959;24163959;24163959;24163959;241…	+;+;+;+;+;+;+;+;+;+;+;+;+;+;+;+;+;+;+;+;+;+;+;+;+;+;+;+;+;+;+;+;+;+;+;+;+;+;+;+;+;+;+;+;+;+;+;+;+;+;+;+;+;+;+;+;+;+;+;+;+;+;+;+;+;+;+;+;+;+;+;+;+	3794	8.24563	10.3904	4.18462	3.67994	4.07888e-12	2.28568e-10	1.2608
CYR61	1;1;1;1;1;1;1	85580761;85581200;85581365;85581928;85581928;85582416;85582740	85581047;85581578;85581578;85582284;85582099;85582624;85583962	+;+;+;+;+;+;+	2455	0	0	0.810676	0.861674	4.18355e-12	2.33571e-10	-8.48232
FURIN	15;15;15;15;15;15;15;15;15;15;15;15;15;15;15;15;15;15;15;15;15;15;15;15;15;15;15;15;15;15;15;15;15;15;15;15;15;15;15;15;15;15;15;15;15;15;15;15;15;15;15;15;15;15;15;15;15;15;15;15;15;15;15;15	90868592;90871539;90872878;90872878;90875582;90875582;90875582;90875582;90875688;90876255;90876255;90876255;90876255;90876255;90876462;90876462;90876462;90876468;90876896;90876896;90876896;90876896;90877135;90877135;90877135;90877135;90877527;90877527;90877527;90878132;90878132;90878132;90878194;90878764;90878764;90878764;90878764;90879444;90879444;90879444;90879444;90879584;90879671;90879671;908…	90868711;90871605;90873098;90873098;90875917;90875917;90875917;90875917;90875917;90876353;90876284;90876353;90876353;90876353;90876557;90876557;90876557;90876557;90877024;90877024;90877024;90877024;90877166;90877211;90877211;90877211;90877615;90877615;90877615;90878304;90878304;90878304;90878304;90878976;90878976;90878976;90878976;90879544;90879544;90879544;90879544;90879774;90879774;90879774;908…	+;+;+;+;+;+;+;+;+;+;+;+;+;+;+;+;+;+;+;+;+;+;+;+;+;+;+;+;+;+;+;+;+;+;+;+;+;+;+;+;+;+;+;+;+;+;+;+;+;+;+;+;+;+;+;+;+;+;+;+;+;+;+;+	4728	15.3781	15.6405	11.2315	10.9966	4.217e-12	2.34577e-10	0.498512
AP000769.1	11	65502034	65503622	-	1589	15.5385	17.1095	9.56448	9.23024	4.31026e-12	2.38889e-10	0.813962
UBASH3B	11;11;11;11;11;11;11;11;11;11;11;11;11;11;11;11;11;11;11;11;11;11;11;11;11;11;11;11;11;11;11;11;11;11;11;11;11;11	122655675;122655725;122709262;122727514;122774096;122775634;122776219;122776219;122776219;122777024;122777024;122777024;122777024;122779377;122779497;122779497;122779497;122779497;122782364;122783053;122783053;122783053;122789100;122789100;122789100;122789100;122794702;122794702;122794778;122796156;122796156;122796911;122796911;122798942;122801188;122806410;122808067;122809749	122656210;122656210;122709474;122727599;122774263;122776272;122776272;122776272;122776272;122777210;122777210;122777210;122777210;122779695;122779702;122779695;122779595;122779695;122783222;122783222;122783222;122783222;122789308;122789308;122789308;122789308;122794796;122794834;122794834;122796276;122796276;122797264;122797033;122799034;122801332;122806516;122808176;122814473	+;+;+;+;+;+;+;+;+;+;+;+;+;+;+;+;+;+;+;+;+;+;+;+;+;+;+;+;+;+;+;+;+;+;+;+;+;+	9011	8.79544	9.12668	6.72633	6.07242	4.41612e-12	2.43866e-10	0.502992
FLNB	3;3;3;3;3;3;3;3;3;3;3;3;3;3;3;3;3;3;3;3;3;3;3;3;3;3;3;3;3;3;3;3;3;3;3;3;3;3;3;3;3;3;3;3;3;3;3;3;3;3;3;3;3;3;3;3;3;3;3;3;3;3;3;3;3;3;3;3;3;3;3;3;3;3;3;3;3;3;3;3;3;3;3;3;3;3;3;3;3;3;3;3;3;3;3;3;3;3;3;3;3;3;3;3;3;3;3;3;3;3;3;3;3;3;3;3;3;3;3;3;3;3;3;3;3;3;3;3;3;3;3;3;3;3;3;3;3;3;3;3;3;3;3;3;3;3;3;3;3;3;3;3;3;3;3;3;3;3;3;3;3;3;3;3;3;3;3;3;3;3;3;3;3;3;3;3;3;3;3;3;3;3;3;3;3;3;3;3;3;3;3;3;3;3;3;3;3;3;3;3…	58008400;58008400;58008400;58008400;58077046;58077046;58077046;58077046;58078329;58078717;58078717;58078717;58078717;58078717;58081629;58081629;58081629;58081629;58081629;58094836;58094836;58094836;58094836;58094836;58096141;58096141;58096141;58096141;58096141;58097815;58097815;58097815;58097815;58097815;58098711;58098711;58098711;58098711;58098711;58102203;58102203;58102203;58102203;58102203;581…	58008856;58008856;58008856;58008856;58077294;58077294;58077294;58077294;58078519;58078814;58078814;58078814;58078814;58078814;58081776;58081776;58081776;58081776;58081776;58094954;58094954;58094954;58094954;58094954;58096218;58096218;58096218;58096218;58096218;58097977;58097977;58097977;58097977;58097977;58098908;58098908;58098908;58098908;58098908;58102340;58102340;58102340;58102340;58102340;581…	+;+;+;+;+;+;+;+;+;+;+;+;+;+;+;+;+;+;+;+;+;+;+;+;+;+;+;+;+;+;+;+;+;+;+;+;+;+;+;+;+;+;+;+;+;+;+;+;+;+;+;+;+;+;+;+;+;+;+;+;+;+;+;+;+;+;+;+;+;+;+;+;+;+;+;+;+;+;+;+;+;+;+;+;+;+;+;+;+;+;+;+;+;+;+;+;+;+;+;+;+;+;+;+;+;+;+;+;+;+;+;+;+;+;+;+;+;+;+;+;+;+;+;+;+;+;+;+	13952	14.894	15.2381	12.1736	12.2813	4.51559e-12	2.48456e-10	0.319114
RNH1	11;11;11;11;11;11;11;11;11;11;11;11;11;11;11;11;11;11;11;11;11;11;11;11;11;11;11;11;11;11;11;11;11;11;11;11;11;11;11;11;11;11;11;11;11;11;11;11;11;11;11;11;11;11;11;11;11;11;11;11;11;11;11;11;11;11;11;11;11;11;11;11;11;11;11;11;11;11;11;11;11;11;11;11;11;11;11;11;11;11;11;11;11;11;11;11;11;11;11;11;11;11;11;11;11;11;11;11;11;11;11;11;11;11;11;11;11;11;11;11;11;11;11;11;11;11;11;11;11;11;11;11;11;…	494512;494513;494515;494515;494516;494523;494544;494546;494548;494552;494561;494883;494883;494883;494883;494883;494883;494883;494883;494883;494883;495008;497971;497971;497971;497971;497971;497971;497971;497971;497971;497971;497971;497971;498457;498457;498457;498457;498457;498457;498457;498457;498457;498457;498457;498457;498763;498763;498763;498763;498763;498763;498763;498763;498763;498763;498763;…	494778;494778;494778;494778;494778;494778;495053;494778;494778;494778;494778;495053;495053;495053;495053;495053;495053;495053;495053;495053;495053;495053;498141;498141;498141;498141;498141;498141;498141;498141;498141;498141;498141;498141;498515;498627;498627;498627;498627;498627;498627;498627;498627;498627;498627;498627;498933;498933;498933;498929;498933;498933;498933;498933;498933;498933;498933;…	-;-;-;-;-;-;-;-;-;-;-;-;-;-;-;-;-;-;-;-;-;-;-;-;-;-;-;-;-;-;-;-;-;-;-;-;-;-;-;-;-;-;-;-;-;-;-;-;-;-;-;-;-;-;-;-;-;-;-;-;-;-;-;-;-;-;-;-;-;-;-;-;-;-;-;-;-;-;-;-;-;-;-;-;-;-;-;-;-;-;-;-;-;-;-;-;-;-;-;-;-;-;-;-;-;-;-;-;-;-;-;-;-;-;-;-;-;-;-;-;-;-;-;-;-;-;-;-	7374	13.899	14.1145	10.5873	10.6016	4.53333e-12	2.48531e-10	0.420733
SESN2	1;1;1;1;1;1;1;1;1;1	28259527;28269183;28271674;28272284;28272581;28273358;28274040;28274825;28279097;28280716	28259937;28269248;28271871;28272466;28272793;28273508;28274158;28275015;28279241;28282491	+;+;+;+;+;+;+;+;+;+	3453	14.5117	14.2378	9.73281	9.36643	4.57739e-12	2.50044e-10	0.607667
VIM-AS1	10;10;10;10;10;10;10	17214239;17215196;17216167;17216167;17217602;17226856;17229345	17215364;17215364;17216274;17216274;17217675;17226898;17229985	-;-;-;-;-;-;-	1992	35.4956	37.2592	25.9539	26.0532	4.85614e-12	2.6432e-10	0.502182
DLGAP5	14;14;14;14;14;14;14;14;14;14;14;14;14;14;14;14;14;14;14;14;14;14;14;14;14;14;14;14;14;14;14;14;14;14;14;14;14;14;14;14;14;14;14;14;14;14;14;14;14;14;14;14	55148112;55148136;55148594;55150328;55150799;55150799;55151695;55151695;55151695;55152590;55152590;55152590;55154617;55154617;55158522;55158522;55162971;55162971;55169399;55169399;55170702;55170702;55175346;55175346;55175894;55175894;55177062;55177062;55179629;55179629;55180656;55180656;55180656;55181213;55181213;55181213;55182370;55182370;55182370;55183560;55183560;55183560;55183606;55188942;551…	55148473;55148473;55148684;55150848;55150848;55150848;55151941;55151941;55151941;55152644;55152647;55152647;55154806;55154806;55158741;55158741;55163075;55163075;55169559;55169559;55170787;55170787;55175472;55175472;55176018;55176018;55177336;55177336;55179699;55179699;55180778;55180778;55180778;55181297;55181297;55181297;55182432;55182432;55182432;55183753;55183753;55183753;55183753;55189180;551…	-;-;-;-;-;-;-;-;-;-;-;-;-;-;-;-;-;-;-;-;-;-;-;-;-;-;-;-;-;-;-;-;-;-;-;-;-;-;-;-;-;-;-;-;-;-;-;-;-;-;-;-	3667	7.79961	8.48897	12.853	12.6785	5.04662e-12	2.73707e-10	-0.630528
RP1-136J15.5	X	109568478	109570289	+	1812	1.33	1.92549	0.049925	0.129716	5.23906e-12	2.83133e-10	4.16166
MYH9	22;22;22;22;22;22;22;22;22;22;22;22;22;22;22;22;22;22;22;22;22;22;22;22;22;22;22;22;22;22;22;22;22;22;22;22;22;22;22;22;22;22;22;22;22;22;22;22;22;22;22;22;22;22;22;22;22;22;22;22;22;22;22;22;22;22;22;22;22;22;22;22;22;22;22;22;22;22	36281281;36284093;36284162;36284214;36284403;36284403;36285121;36285121;36285121;36285658;36285658;36285658;36285865;36285865;36285865;36286718;36288252;36288727;36289085;36291986;36293329;36293759;36294092;36294932;36295505;36295512;36296843;36296843;36298919;36300127;36300851;36300910;36301534;36301534;36302308;36302568;36303995;36303995;36305033;36305930;36306414;36309282;36312049;36314145;363…	36282785;36284265;36284307;36284511;36284511;36284511;36285329;36285329;36285329;36285781;36285781;36285781;36286021;36286044;36285953;36286846;36288413;36288939;36289297;36292234;36293481;36293863;36294298;36295076;36295717;36295717;36297323;36297014;36299042;36300264;36301057;36301057;36301714;36301665;36302676;36302676;36304025;36304155;36305102;36306051;36306607;36309396;36312222;36314318;363…	-;-;-;-;-;-;-;-;-;-;-;-;-;-;-;-;-;-;-;-;-;-;-;-;-;-;-;-;-;-;-;-;-;-;-;-;-;-;-;-;-;-;-;-;-;-;-;-;-;-;-;-;-;-;-;-;-;-;-;-;-;-;-;-;-;-;-;-;-;-;-;-;-;-;-;-;-;-	8959	426.063	422.876	352.662	345.981	5.33033e-12	2.87044e-10	0.299104
CD74	5;5;5;5;5;5;5;5;5;5;5;5;5;5;5;5;5;5;5;5;5;5;5;5;5;5;5;5;5;5;5;5;5;5;5;5;5;5;5;5;5;5;5;5;5;5;5;5;5;5;5;5;5;5;5;5;5;5;5;5;5;5;5;5;5;5;5	150401637;150401670;150401699;150401864;150402152;150402170;150402563;150402563;150402563;150402563;150403121;150403121;150403121;150404486;150404664;150404680;150404680;150404680;150405085;150405085;150405085;150405085;150405085;150405316;150405978;150406039;150406259;150406259;150406259;150406259;150406259;150406259;150406259;150406259;150406259;150406705;150406881;150406881;150406881;150406881…	150402250;150402250;150402625;150402004;150402250;150402250;150402625;150402625;150402625;150402625;150403312;150403312;150403312;150404767;150404767;150404767;150404767;150404767;150405180;150405180;150405180;150405180;150405180;150405671;150406321;150406321;150406321;150406321;150406321;150406321;150406321;150406321;150406321;150406321;150406321;150406960;150407324;150406960;150406960;150406960…	-;-;-;-;-;-;-;-;-;-;-;-;-;-;-;-;-;-;-;-;-;-;-;-;-;-;-;-;-;-;-;-;-;-;-;-;-;-;-;-;-;-;-;-;-;-;-;-;-;-;-;-;-;-;-;-;-;-;-;-;-;-;-;-;-;-;-	3184	46.3277	42.6646	33.5689	34.622	5.6546e-12	3.0343e-10	0.402368
SLC39A10	2;2;2;2;2;2;2;2;2;2;2;2;2;2;2;2;2;2;2;2;2;2;2;2;2;2;2;2;2;2;2;2;2;2;2;2;2;2;2;2;2;2;2;2;2;2;2;2;2;2;2;2	195575977;195606136;195656747;195656911;195657128;195657128;195657136;195657235;195657449;195658064;195671657;195680032;195680032;195680032;195680032;195680032;195680032;195680032;195680477;195680893;195680893;195683699;195683699;195683699;195683699;195683699;195706616;195706616;195706616;195706616;195706616;195708656;195708656;195708656;195708656;195713433;195713433;195713433;195713433;195716637…	195576082;195606233;195657010;195657010;195657281;195657281;195657281;195657281;195657609;195658587;195671720;195680158;195680433;195680048;195681050;195680048;195680420;195681050;195681050;195681050;195681050;195683906;195683906;195683906;195683906;195683906;195706785;195706785;195706676;195706785;195706785;195708844;195708844;195708844;195708844;195713553;195713553;195713553;195713553;195717383…	+;+;+;+;+;+;+;+;+;+;+;+;+;+;+;+;+;+;+;+;+;+;+;+;+;+;+;+;+;+;+;+;+;+;+;+;+;+;+;+;+;+;+;+;+;+;+;+;+;+;+;+	6917	4.29925	4.3628	6.74851	6.70103	5.84571e-12	3.12581e-10	-0.61678
RGS16	1;1;1;1;1	182598623;182601966;182602420;182603229;182604216	182600513;182602132;182602484;182603339;182604408	-;-;-;-;-	2427	14.6886	14.5251	21.768	22.4683	6.13059e-12	3.26664e-10	-0.580378
ELOVL5	6;6;6;6;6;6;6;6;6;6;6;6;6;6;6;6;6;6;6;6;6;6;6;6;6;6;6;6;6;6;6;6;6;6;6;6;6;6;6;6;6;6;6;6;6;6	53267398;53267398;53267399;53270593;53270593;53270593;53273220;53273220;53275090;53275090;53275090;53275125;53276179;53276179;53276179;53276179;53276179;53276179;53277646;53287862;53290095;53290095;53290401;53290401;53290401;53291776;53291776;53291776;53291776;53291776;53291776;53294088;53295642;53295642;53295642;53295642;53295642;53295642;53295642;53348817;53348817;53348817;53348817;53348817;533…	53269270;53269270;53269270;53270727;53270727;53270727;53273344;53273344;53275261;53275261;53275261;53275261;53276256;53276256;53276256;53276256;53276256;53276256;53277743;53287942;53290189;53290189;53290535;53290535;53290535;53291963;53291963;53291963;53291963;53291963;53291963;53294491;53295707;53295707;53295707;53295707;53295707;53295707;53295707;53348926;53348950;53348950;53348973;53349007;533…	-;-;-;-;-;-;-;-;-;-;-;-;-;-;-;-;-;-;-;-;-;-;-;-;-;-;-;-;-;-;-;-;-;-;-;-;-;-;-;-;-;-;-;-;-;-	3813	11.8656	13.357	17.9955	19.171	6.71319e-12	3.56456e-10	-0.541135
GPX1P1	X	13378735	13379340	-	606	409.613	414.085	339.837	334.882	7.03516e-12	3.72251e-10	0.305715
RP11-800A3.4	11	73238975	73242335	+	3361	41.3174	38.3551	30.4687	30.8965	7.7293e-12	4.0756e-10	0.39483
DDN	12;12	48995149;48999079	48998666;48999309	-;-	3749	2.42576	2.35683	4.54854	5.07834	7.88449e-12	4.14304e-10	-0.990002
PIM2	X;X;X;X;X;X;X;X;X;X	48913182;48914104;48914395;48914395;48914396;48915020;48915020;48917781;48918536;48918774	48914294;48914294;48914914;48914571;48914571;48915735;48915392;48917831;48918645;48919024	-;-;-;-;-;-;-;-;-;-	2761	6.6864	7.45072	3.88265	3.60954	8.48084e-12	4.44103e-10	0.932793
FES	15;15;15;15;15;15;15;15;15;15;15;15;15;15;15;15;15;15;15;15;15;15;15;15;15;15;15;15;15;15;15;15;15;15;15;15;15;15;15;15;15;15;15;15;15;15;15;15;15;15;15;15;15;15;15;15;15;15;15;15;15;15;15;15;15;15;15;15;15;15;15;15;15;15;15;15;15;15;15;15;15;15;15;15;15;15;15;15;15;15;15;15;15;15;15;15;15;15;15;15;15;15;15;15;15;15;15;15;15;15;15;15;15;15;15;15;15;15;15;15;15;15;15;15;15;15;15;15;15;15;15;15;15;…	90883695;90884412;90884447;90884447;90884469;90884469;90884469;90884504;90884523;90884713;90885037;90885037;90885037;90885037;90885037;90885037;90885037;90885037;90885037;90885042;90885046;90885046;90885340;90885412;90885412;90885412;90885412;90885412;90885412;90886961;90886961;90886961;90886961;90886961;90886961;90886961;90886961;90886961;90886961;90887187;90887187;90887187;90887187;90887187;908…	90884043;90884544;90884544;90884639;90884544;90884544;90884544;90884639;90884544;90884903;90885258;90885258;90885258;90885258;90885529;90885258;90885585;90885258;90885172;90885258;90885258;90885258;90885585;90885585;90885542;90885585;90885585;90885585;90885585;90887057;90887057;90887057;90887057;90887015;90887057;90887057;90887057;90887057;90887057;90887370;90887370;90887370;90887370;90887209;908…	+;+;+;+;+;+;+;+;+;+;+;+;+;+;+;+;+;+;+;+;+;+;+;+;+;+;+;+;+;+;+;+;+;+;+;+;+;+;+;+;+;+;+;+;+;+;+;+;+;+;+;+;+;+;+;+;+;+;+;+;+;+;+;+;+;+;+;+;+;+;+;+;+;+;+;+;+;+;+;+;+;+;+;+;+;+;+;+;+;+;+;+;+;+;+;+;+;+;+;+;+;+;+;+;+;+;+;+;+;+;+;+;+;+;+;+;+;+;+;+;+;+;+;+;+;+;+;+	4237	35.9302	35.3766	27.404	28.8135	8.79642e-12	4.5838e-10	0.361227
TOP2A	17;17;17;17;17;17;17;17;17;17;17;17;17;17;17;17;17;17;17;17;17;17;17;17;17;17;17;17;17;17;17;17;17;17;17;17;17;17;17;17;17;17;17;17;17;17;17;17;17	40388516;40388526;40389516;40389562;40389965;40389965;40391506;40391506;40392068;40392218;40392585;40395449;40396283;40396383;40398558;40398558;40398773;40398773;40399040;40399040;40399872;40400209;40400529;40400850;40402906;40404152;40404377;40404791;40406384;40406584;40406832;40407549;40407967;40408492;40411109;40411354;40411645;40412759;40413195;40413480;40413480;40416005;40416005;40416422;404…	40389647;40388858;40389602;40389647;40390164;40390164;40392101;40391640;40392111;40392341;40392737;40395539;40396465;40396465;40398641;40398641;40398937;40398937;40399261;40399131;40400067;40400409;40400663;40401081;40403054;40404273;40404491;40404883;40406493;40406689;40406942;40407674;40408124;40408630;40411246;40411455;40411818;40412971;40413292;40413625;40413625;40416068;40416068;40416512;404…	-;-;-;-;-;-;-;-;-;-;-;-;-;-;-;-;-;-;-;-;-;-;-;-;-;-;-;-;-;-;-;-;-;-;-;-;-;-;-;-;-;-;-;-;-;-;-;-;-	6437	54.7812	55.1172	67.4581	69.8455	8.82721e-12	4.5838e-10	-0.303194
FKBP4	12;12;12;12;12;12;12;12;12;12;12;12;12;12;12;12;12;12;12;12;12;12;12;12;12;12;12;12	2794953;2795069;2795140;2795657;2796265;2796265;2796681;2797138;2797138;2797138;2797138;2797729;2797729;2798706;2798767;2799088;2799850;2799850;2800039;2800039;2800392;2800392;2801117;2801178;2801613;2803151;2803197;2805168	2795244;2795244;2795244;2796368;2796315;2796368;2796964;2797282;2797202;2797282;2797282;2797871;2797871;2798826;2799244;2799244;2799940;2799940;2800122;2800122;2800465;2800577;2801356;2801356;2801803;2805423;2803240;2805410	+;+;+;+;+;+;+;+;+;+;+;+;+;+;+;+;+;+;+;+;+;+;+;+;+;+;+;+	5180	20.8745	20.4777	27.4798	26.581	8.84402e-12	4.5838e-10	-0.368734
PLAGL1	6;6;6;6;6;6;6;6;6;6;6;6;6;6;6;6;6;6;6;6;6;6;6;6;6;6;6;6;6;6;6;6;6;6;6;6;6;6;6;6;6;6;6;6;6;6;6;6;6;6;6;6;6;6;6;6;6;6;6;6;6;6;6;6;6;6;6;6;6;6;6;6;6;6;6;6;6;6;6;6;6;6;6;6;6;6;6;6;6;6;6;6;6;6;6;6;6;6;6;6;6;6;6;6;6;6;6;6;6;6;6;6;6	143940300;143940302;143940302;143940302;143940302;143940302;143940338;143940746;143941284;143941424;143942353;143942420;143942436;143942440;143942507;143942624;143942624;143947985;143947985;143947985;143947985;143947985;143947985;143947985;143948247;143948260;143948344;143960469;143960469;143960469;143960469;143960469;143960469;143960469;143960469;143960469;143960469;143960469;143960469;143960469…	143942663;143942663;143942663;143942663;143942388;143942663;143942663;143942663;143942663;143942663;143942663;143942663;143942663;143942663;143942663;143942663;143942663;143948460;143948460;143948460;143948460;143948460;143948460;143948460;143948460;143948460;143948460;143960542;143960556;143960542;143960556;143960542;143960542;143961412;143960542;143960542;143960556;143960542;143960542;143960580…	-;-;-;-;-;-;-;-;-;-;-;-;-;-;-;-;-;-;-;-;-;-;-;-;-;-;-;-;-;-;-;-;-;-;-;-;-;-;-;-;-;-;-;-;-;-;-;-;-;-;-;-;-;-;-;-;-;-;-;-;-;-;-;-;-;-;-;-;-;-;-;-;-;-;-;-;-;-;-;-;-;-;-;-;-;-;-;-;-;-;-;-;-;-;-;-;-;-;-;-;-;-;-;-;-;-;-;-;-;-;-;-;-	8719	2.88919	2.96222	4.76236	4.5451	9.10474e-12	4.70288e-10	-0.651826
FOSL2	2;2;2;2;2;2;2;2;2;2;2;2;2;2;2	28392448;28392802;28392858;28395511;28404107;28404107;28404107;28404107;28408759;28408759;28408759;28408759;28411879;28411930;28411930	28392544;28392836;28393822;28395776;28404358;28404358;28404358;28404358;28408866;28408866;28408802;28408866;28417312;28412192;28417312	+;+;+;+;+;+;+;+;+;+;+;+;+;+;+	7157	13.0243	14.2196	10.3458	9.90495	9.14496e-12	4.70764e-10	0.445487
PPP3CA	4;4;4;4;4;4;4;4;4;4;4;4;4;4;4;4;4;4;4;4;4;4;4;4;4;4;4;4;4;4;4;4;4;4;4;4;4;4;4;4;4;4;4;4;4;4;4;4;4;4;4;4;4;4;4;4;4;4;4;4;4;4;4;4;4;4;4;4;4;4;4;4;4;4;4;4;4;4;4;4;4;4;4	101023409;101023430;101023431;101024328;101025318;101029166;101029166;101029166;101032267;101032267;101032267;101032267;101032267;101040482;101040482;101040482;101040482;101040482;101061087;101061087;101061087;101061087;101061087;101063232;101063232;101063232;101063232;101080532;101080532;101080532;101080532;101083186;101083186;101083186;101083186;101083195;101093776;101093776;101093776;101093776…	101026061;101026061;101026061;101026061;101026061;101029195;101029195;101029195;101032364;101032364;101032364;101032364;101032364;101040566;101040566;101040566;101040566;101040566;101061161;101061161;101061161;101061161;101061161;101063357;101063357;101063357;101063357;101080626;101080626;101080626;101080626;101083263;101083263;101083263;101083263;101083263;101093915;101093915;101093915;101093915…	-;-;-;-;-;-;-;-;-;-;-;-;-;-;-;-;-;-;-;-;-;-;-;-;-;-;-;-;-;-;-;-;-;-;-;-;-;-;-;-;-;-;-;-;-;-;-;-;-;-;-;-;-;-;-;-;-;-;-;-;-;-;-;-;-;-;-;-;-;-;-;-;-;-;-;-;-;-;-;-;-;-;-	5213	5.93136	5.98881	9.01517	9.29722	9.29423e-12	4.76832e-10	-0.601214
CEBPG	19;19;19;19	33373330;33374312;33379144;33379144	33373895;33374613;33382686;33382686	+;+;+;+	4411	34.0284	34.1865	27.1228	27.0907	9.43473e-12	4.8241e-10	0.34937
ST7L	1;1;1;1;1;1;1;1;1;1;1;1;1;1;1;1;1;1;1;1;1;1;1;1;1;1;1;1;1;1;1;1;1;1;1;1;1;1;1;1;1;1;1;1;1;1;1;1;1;1;1;1;1;1;1;1;1;1;1;1;1;1;1;1;1;1;1;1;1;1;1;1;1;1;1;1;1;1;1;1;1;1;1;1;1;1;1;1;1;1;1;1;1;1;1;1;1;1;1;1;1;1;1;1;1;1;1;1;1;1;1;1;1;1;1;1;1;1;1;1;1;1;1;1;1;1;1;1;1;1;1;1;1;1;1;1;1;1;1;1;1;1;1;1;1;1;1;1;1;1;1;1;1;1;1;1;1;1;1;1;1;1;1;1;1;1;1;1;1;1;1;1;1;1;1;1;1;1;1;1;1;1;1;1;1;1;1;1;1;1;1;1;1;1;1;1;1;1;1;1…	112523518;112523518;112523518;112523518;112525282;112525530;112525876;112525879;112525883;112525986;112526886;112539159;112540779;112540779;112540779;112541790;112541790;112541790;112541794;112541951;112541951;112541951;112541951;112541951;112541951;112541951;112541951;112541951;112550601;112550601;112550601;112550601;112550601;112550601;112550601;112550601;112550601;112550601;112555868;112555868…	112526111;112526111;112526111;112526111;112526111;112526111;112526111;112526111;112526111;112526111;112526952;112539275;112540872;112540872;112540872;112542090;112542090;112542090;112542090;112542090;112542090;112542090;112541975;112542090;112542090;112542090;112542090;112542090;112550693;112550693;112550693;112550693;112550693;112550693;112550693;112550693;112550693;112550693;112556018;112556018…	-;-;-;-;-;-;-;-;-;-;-;-;-;-;-;-;-;-;-;-;-;-;-;-;-;-;-;-;-;-;-;-;-;-;-;-;-;-;-;-;-;-;-;-;-;-;-;-;-;-;-;-;-;-;-;-;-;-;-;-;-;-;-;-;-;-;-;-;-;-;-;-;-;-;-;-;-;-;-;-;-;-;-;-;-;-;-;-;-;-;-;-;-;-;-;-;-;-;-;-;-;-;-;-;-;-;-;-;-;-;-;-;-;-;-;-;-;-;-;-;-;-;-;-;-;-;-;-	8111	2.83667	2.80439	1.65626	1.55905	9.5323e-12	4.85764e-10	0.828108
C10orf2	10;10;10;10;10;10;10;10;10;10;10;10;10;10;10;10;10;10;10;10;10;10	100987367;100987550;100987795;100988026;100988026;100989644;100989644;100989644;100989644;100989706;100990436;100990436;100990436;100990436;100990869;100990869;100990869;100990869;100993190;100993190;100993190;100993190	100987557;100987613;100987880;100989453;100989453;100989884;100989884;100989884;100989884;100989884;100990543;100990543;100990543;100990543;100991010;100991054;100991010;100991054;100994401;100994401;100993580;100993363	+;+;+;+;+;+;+;+;+;+;+;+;+;+;+;+;+;+;+;+;+;+	3508	50.552	49.5999	65.3982	61.4817	9.71181e-12	4.93256e-10	-0.323438
CXCR4	2;2;2;2;2	136114349;136114351;136114637;136117529;136118046	136116243;136115912;136115912;136117737;136118165	-;-;-;-;-	2224	22.6536	23.43	15.9858	15.1554	1.00977e-11	5.11146e-10	0.582904
KDM6B	17;17;17;17;17;17;17;17;17;17;17;17;17;17;17;17;17;17;17;17;17;17;17;17;17;17;17;17;17;17;17;17;17;17;17;17;17;17;17;17;17;17;17;17;17;17;17;17;17;17;17;17;17;17;17;17;17;17;17;17;17;17	7839904;7839904;7839962;7839991;7840284;7840284;7844207;7844901;7844901;7844901;7844901;7844915;7845314;7845314;7845314;7845314;7845550;7845550;7845550;7845872;7845872;7845872;7846078;7846078;7846078;7846400;7846400;7846400;7846579;7846579;7846579;7846819;7846819;7847105;7847105;7847105;7847546;7847546;7847546;7849821;7849821;7850072;7850072;7851021;7851021;7851330;7851330;7851478;7851478;7851648…	7840024;7840024;7840024;7840024;7840681;7840370;7844353;7844972;7845020;7845020;7845020;7845020;7845456;7845456;7845456;7845347;7845691;7845691;7845691;7845970;7845970;7845970;7846297;7846297;7846297;7846492;7846492;7846492;7846740;7846740;7846740;7847016;7847016;7847452;7847452;7847452;7847571;7849728;7849728;7849947;7849947;7850177;7850177;7851226;7851226;7851394;7851394;7851549;7851549;7851796…	+;+;+;+;+;+;+;+;+;+;+;+;+;+;+;+;+;+;+;+;+;+;+;+;+;+;+;+;+;+;+;+;+;+;+;+;+;+;+;+;+;+;+;+;+;+;+;+;+;+;+;+;+;+;+;+;+;+;+;+;+;+	7258	12.6927	13.2039	9.15484	10.0262	1.06479e-11	5.37205e-10	0.451443
PLAC8	4;4;4;4;4;4;4;4;4;4;4;4;4;4;4;4;4;4;4;4;4;4;4;4;4;4;4;4;4	83090048;83090688;83090793;83090793;83090806;83092861;83094678;83094678;83094678;83094678;83094678;83104896;83104896;83104896;83104896;83104896;83107804;83107804;83107804;83107804;83109728;83114666;83114666;83114666;83114666;83115265;83117884;83134535;83136959	83090971;83090971;83090971;83090971;83090971;83094791;83094791;83094791;83094791;83094791;83094791;83105020;83105020;83105020;83105020;83105020;83107950;83107950;83107950;83107950;83109843;83114715;83114736;83114736;83114802;83115432;83117971;83134634;83137075	-;-;-;-;-;-;-;-;-;-;-;-;-;-;-;-;-;-;-;-;-;-;-;-;-;-;-;-;-	3853	13.253	13.183	9.1685	8.73567	1.14775e-11	5.77143e-10	0.579779
DNTTIP2	1;1;1;1;1;1;1;1;1;1;1;1;1;1;1;1;1;1;1;1;1;1;1;1;1;1	93866283;93869780;93869780;93869798;93870683;93870683;93870683;93870683;93872072;93872072;93872072;93873119;93873119;93873119;93875645;93875666;93876268;93876268;93876268;93876759;93877473;93878548;93879077;93879077;93879077;93879077	93869944;93869944;93869944;93869944;93870792;93870997;93870792;93870792;93872236;93872236;93872236;93873369;93873214;93873214;93875783;93875783;93877862;93877862;93877862;93877489;93877883;93879918;93879156;93879164;93879162;93879206	-;-;-;-;-;-;-;-;-;-;-;-;-;-;-;-;-;-;-;-;-;-;-;-;-;-	7519	26.5846	26.8651	33.4352	33.2984	1.20109e-11	6.01973e-10	-0.302292
HOMER2	15;15;15;15;15;15;15;15;15;15;15;15;15;15;15;15;15;15;15;15;15;15;15;15;15;15;15;15;15;15;15;15;15;15;15;15;15;15;15;15;15;15;15	82836946;82848983;82848983;82849679;82849689;82851151;82851151;82851151;82851196;82852142;82852142;82852142;82852142;82854644;82854644;82854644;82854695;82859029;82859029;82859029;82859029;82864167;82864167;82864167;82864167;82864213;82875273;82875273;82875273;82875273;82892685;82892685;82892685;82892685;82892685;82898390;82952531;82952531;82958130;82985553;82985787;82985787;82986080	82847247;82849903;82849903;82849903;82849727;82851231;82851231;82851231;82851231;82852783;82852252;82852252;82852252;82854800;82854800;82854800;82854800;82859186;82859135;82859168;82859135;82864259;82864259;82864259;82864259;82864259;82875404;82875404;82875404;82875404;82892841;82892841;82892841;82892841;82892841;82898453;82952728;82952721;82959308;82986070;82985868;82986120;82986153	-;-;-;-;-;-;-;-;-;-;-;-;-;-;-;-;-;-;-;-;-;-;-;-;-;-;-;-;-;-;-;-;-;-;-;-;-;-;-;-;-;-;-	14685	0.882478	0.956526	0.40658	0.43856	1.31321e-11	6.56001e-10	1.1396
TBC1D8	2;2;2;2;2;2;2;2;2;2;2;2;2;2;2;2;2;2;2;2;2;2;2;2;2;2;2;2;2;2;2;2;2;2;2;2;2;2;2;2;2;2;2;2;2;2;2;2;2;2;2;2;2;2;2;2;2;2;2;2;2;2;2;2;2;2	101007617;101007617;101010929;101010929;101011040;101011451;101011451;101021681;101021681;101021681;101022281;101022281;101022281;101027383;101027383;101028048;101028048;101028303;101028303;101028303;101028345;101028467;101029491;101029491;101029491;101029491;101029491;101032268;101032268;101032268;101032268;101033544;101033544;101036018;101036018;101037532;101037532;101038461;101038461;101040178…	101008273;101008273;101011026;101011026;101011540;101011540;101011540;101021746;101021746;101021746;101022373;101022521;101022521;101027451;101027451;101028146;101028146;101028432;101028432;101028432;101028432;101028539;101029776;101029972;101029776;101029776;101029776;101032944;101032481;101032385;101032385;101033758;101033758;101036168;101036168;101037708;101037708;101038655;101038655;101040385…	-;-;-;-;-;-;-;-;-;-;-;-;-;-;-;-;-;-;-;-;-;-;-;-;-;-;-;-;-;-;-;-;-;-;-;-;-;-;-;-;-;-;-;-;-;-;-;-;-;-;-;-;-;-;-;-;-;-;-;-;-;-;-;-;-;-	6030	15.8884	15.9154	11.6343	12.3175	1.32242e-11	6.58434e-10	0.427308
JAML	11;11;11;11;11;11;11;11;11;11;11;11;11;11;11;11;11;11;11;11;11;11;11;11;11;11;11;11;11;11;11;11;11;11;11;11;11;11;11;11;11;11;11;11;11;11;11;11;11;11;11;11;11;11;11;11;11;11;11;11;11;11;11;11;11;11;11;11;11;11;11;11;11;11;11;11;11;11;11;11;11;11;11;11	118193740;118193963;118193965;118193994;118194004;118194077;118194165;118196735;118196735;118196735;118196735;118196735;118196735;118196735;118197609;118197968;118197998;118197998;118197998;118197998;118197998;118200474;118200474;118200474;118200474;118200474;118200474;118200474;118200474;118203428;118203428;118203428;118203428;118203428;118203428;118203428;118205659;118205882;118205882;118205882…	118194417;118194417;118194417;118194417;118194417;118194417;118194417;118196821;118196821;118196821;118196821;118198091;118196821;118196821;118198091;118198091;118198091;118198091;118198091;118198091;118198091;118200612;118200612;118200612;118200612;118200612;118203665;118200612;118200612;118203665;118203665;118205390;118203665;118203665;118203665;118203665;118205991;118205991;118205991;118205991…	-;-;-;-;-;-;-;-;-;-;-;-;-;-;-;-;-;-;-;-;-;-;-;-;-;-;-;-;-;-;-;-;-;-;-;-;-;-;-;-;-;-;-;-;-;-;-;-;-;-;-;-;-;-;-;-;-;-;-;-;-;-;-;-;-;-;-;-;-;-;-;-;-;-;-;-;-;-;-;-;-;-;-;-	8587	1.59918	1.68329	0.690043	0.832117	1.45108e-11	7.20132e-10	1.12781
SRPRA	11;11;11;11;11;11;11;11;11;11;11;11;11;11;11;11;11;11;11;11;11;11;11;11;11;11;11;11;11;11;11;11;11;11;11;11;11;11;11;11;11;11;11	126262919;126263474;126263841;126264191;126264191;126264376;126264376;126264376;126264959;126264959;126265021;126265080;126265268;126265268;126265268;126265268;126265737;126265737;126265737;126265963;126265963;126265963;126266187;126266187;126266187;126266476;126266476;126266763;126266763;126267174;126267175;126267175;126267549;126267549;126267578;126268003;126268003;126268003;126268688;126268688…	126264044;126264044;126264289;126264289;126264289;126264755;126264539;126264539;126265172;126265172;126265172;126265172;126265657;126265440;126265440;126265440;126265823;126265823;126265823;126266081;126266081;126266081;126266401;126266278;126266278;126266629;126266629;126266922;126266922;126267712;126267335;126267335;126267712;126267712;126267712;126268086;126268086;126268086;126268920;126268867…	-;-;-;-;-;-;-;-;-;-;-;-;-;-;-;-;-;-;-;-;-;-;-;-;-;-;-;-;-;-;-;-;-;-;-;-;-;-;-;-;-;-;-	4167	32.3217	31.4038	25.0638	25.0219	1.5299e-11	7.56778e-10	0.365474
ZMAT1	X;X;X;X;X;X;X;X;X;X;X;X;X;X;X;X;X;X;X;X;X;X;X;X;X;X;X;X;X;X;X;X;X;X;X;X;X	101882288;101882290;101882658;101883060;101883640;101884696;101886632;101886632;101886632;101886632;101886632;101886632;101887198;101887198;101887198;101892705;101894454;101894454;101895814;101895814;101897868;101897868;101897868;101897868;101898119;101898119;101898119;101898119;101904224;101904224;101904224;101904224;101918513;101918513;101931717;101931717;101931717	101884821;101884821;101884821;101884821;101884821;101884821;101886731;101886731;101890221;101886731;101886731;101886731;101887726;101887304;101887304;101892754;101894904;101894904;101895882;101895879;101898042;101898042;101898042;101898042;101898220;101898220;101898220;101898220;101904330;101904330;101904330;101904330;101918633;101918633;101932027;101932031;101931764	-;-;-;-;-;-;-;-;-;-;-;-;-;-;-;-;-;-;-;-;-;-;-;-;-;-;-;-;-;-;-;-;-;-;-;-;-	7514	3.85479	3.52169	2.29351	2.1146	1.56842e-11	7.73313e-10	0.759868
PPAN-P2RY11	19;19;19;19;19;19;19;19;19;19;19;19;19;19;19;19;19;19;19;19;19;19;19;19;19;19	10106223;10106395;10106501;10106501;10107505;10107505;10107804;10107804;10107964;10107964;10109631;10109631;10109913;10109913;10110123;10110123;10110324;10110324;10110485;10110485;10110697;10110697;10110945;10110945;10113633;10113633	10106412;10106412;10106671;10106671;10107606;10107606;10107854;10107854;10108134;10108134;10109707;10109707;10110020;10110020;10110246;10110246;10110402;10110402;10110614;10110614;10110866;10110866;10111022;10111084;10114738;10114780	+;+;+;+;+;+;+;+;+;+;+;+;+;+;+;+;+;+;+;+;+;+;+;+;+;+	2661	116.761	118.907	149.023	144.755	1.58832e-11	7.80592e-10	-0.300089
RRP36	6;6;6;6;6;6;6;6;6;6;6;6;6	43021645;43024985;43025263;43026037;43026073;43027130;43027178;43027360;43027360;43029092;43029092;43033152;43033853	43021784;43025132;43025329;43026141;43026141;43027252;43027252;43027477;43027477;43029190;43029597;43034156;43033971	+;+;+;+;+;+;+;+;+;+;+;+;+	2212	23.2699	24.356	33.8218	33.1954	1.7257e-11	8.45373e-10	-0.474939
GOLGA8IP	15;15;15;15;15;15;15;15;15;15;15;15;15;15;15;15;15;15;15;15;15;15;15;15;15;15;15;15;15;15	22607540;22607800;22608051;22608231;22608906;22609429;22610353;22610753;22611077;22611077;22611702;22611702;22611985;22611985;22612199;22612199;22613175;22613175;22613380;22613380;22613553;22613553;22614694;22614694;22614956;22614956;22615919;22615919;22617709;22617709	22607715;22607955;22608148;22608331;22608997;22609504;22610821;22610821;22611333;22611333;22611789;22611789;22612092;22612092;22612285;22612285;22613284;22613284;22613464;22613464;22613840;22613840;22614774;22614774;22615015;22615015;22616038;22616038;22617854;22617756	-;-;-;-;-;-;-;-;-;-;-;-;-;-;-;-;-;-;-;-;-;-;-;-;-;-;-;-;-;-	2598	13.1792	13.0109	19.7433	19.5781	1.77332e-11	8.65906e-10	-0.568286
TONSL	8;8;8;8;8;8;8;8;8;8;8;8;8;8;8;8;8;8;8;8;8;8;8;8;8;8;8;8;8;8;8;8;8;8;8;8;8;8;8;8;8;8;8;8;8;8;8;8;8;8;8;8;8;8;8;8;8;8;8;8;8;8;8	144428775;144428808;144430404;144430404;144431078;144431078;144432285;144432285;144433588;144433978;144433978;144434811;144434811;144435017;144435017;144435474;144435474;144435658;144435658;144436558;144436558;144436605;144436757;144436757;144436757;144437027;144437027;144437027;144438471;144438471;144438471;144438653;144438653;144438653;144438666;144440021;144440021;144440021;144440076;144440159…	144429336;144429336;144430537;144430537;144431151;144431151;144432460;144433759;144433759;144434279;144434279;144434889;144434889;144435170;144435170;144435550;144435550;144436418;144436418;144436681;144436681;144436680;144436920;144436920;144436920;144437099;144437099;144437099;144438560;144438560;144438560;144438664;144438735;144438735;144438735;144440073;144440210;144440210;144440156;144440167…	-;-;-;-;-;-;-;-;-;-;-;-;-;-;-;-;-;-;-;-;-;-;-;-;-;-;-;-;-;-;-;-;-;-;-;-;-;-;-;-;-;-;-;-;-;-;-;-;-;-;-;-;-;-;-;-;-;-;-;-;-;-;-	7111	12.9487	13.2092	17.7468	16.7715	1.79056e-11	8.71518e-10	-0.382396
ZNF438	10;10;10;10;10;10;10;10;10;10;10;10;10;10;10;10;10;10;10;10;10;10;10;10;10;10;10;10;10;10;10;10;10;10;10;10;10;10;10;10;10;10;10;10;10;10;10;10;10;10;10;10;10;10;10;10;10;10;10;10;10;10;10;10;10;10;10;10	30820207;30830114;30834121;30835567;30844634;30844634;30844638;30844638;30844638;30844638;30844772;30844781;30848531;30848531;30848531;30848531;30848531;30848531;30848531;30848531;30850222;30850222;30857680;30857680;30875331;30876998;30876998;30876998;30876998;30876998;30876998;30876998;30876998;30876998;30908933;30908933;30908933;30908933;30908933;30908933;30908933;30908933;30908933;30910360;309…	30820444;30830167;30834212;30835640;30845573;30845573;30845573;30845573;30845573;30845573;30845573;30845573;30849443;30850367;30850367;30850367;30850367;30850367;30850367;30850367;30850367;30850367;30857778;30857778;30875509;30877065;30877065;30877065;30877065;30877065;30877065;30877065;30877065;30877065;30909015;30909015;30909015;30909015;30909015;30909015;30909015;30909015;30909015;30910440;309…	-;-;-;-;-;-;-;-;-;-;-;-;-;-;-;-;-;-;-;-;-;-;-;-;-;-;-;-;-;-;-;-;-;-;-;-;-;-;-;-;-;-;-;-;-;-;-;-;-;-;-;-;-;-;-;-;-;-;-;-;-;-;-;-;-;-;-;-	4267	11.2532	10.6934	7.24009	7.48048	1.92379e-11	9.30447e-10	0.594338
CALCOCO2	17;17;17;17;17;17;17;17;17;17;17;17;17;17;17;17;17;17;17;17;17;17;17;17;17;17;17;17;17;17;17;17;17;17;17;17;17;17;17;17;17;17;17;17;17;17;17;17;17;17;17;17;17;17;17;17;17;17;17;17;17;17;17;17;17;17;17;17;17;17;17;17;17;17;17;17;17;17;17;17;17;17;17;17;17;17;17;17;17;17;17;17;17;17;17;17;17;17;17;17;17;17;17;17;17;17;17;17;17;17;17;17;17;17;17;17;17;17;17;17;17;17;17;17;17;17;17;17;17;17;17;17;17;…	48830988;48831018;48831026;48831034;48831035;48831035;48831035;48831035;48831035;48831035;48831035;48831037;48831043;48831045;48831056;48831228;48839376;48839376;48841563;48841698;48841698;48841698;48841698;48841698;48841698;48841698;48841698;48841698;48841698;48841698;48841698;48841698;48841774;48842201;48842201;48843903;48843903;48846034;48846443;48847724;48848064;48848064;48848064;48848064;488…	48831078;48831078;48831078;48831078;48831078;48831078;48831078;48831078;48831078;48831078;48831078;48831078;48831078;48831078;48831078;48831876;48839511;48839511;48841887;48841887;48841887;48841887;48841887;48841887;48841887;48841887;48841887;48842662;48841887;48841887;48841887;48841887;48841887;48842294;48842534;48844026;48844026;48846096;48846514;48848166;48848166;48848166;48848166;48848166;488…	+;+;+;+;+;+;+;+;+;+;+;+;+;+;+;+;+;+;+;+;+;+;+;+;+;+;+;+;+;+;+;+;+;+;+;+;+;+;+;+;+;+;+;+;+;+;+;+;+;+;+;+;+;+;+;+;+;+;+;+;+;+;+;+;+;+;+;+;+;+;+;+;+;+;+;+;+;+;+;+;+;+;+;+;+;+;+;+;+;+;+;+;+;+;+;+;+;+;+;+;+;+;+;+;+;+;+;+;+;+;+;+;+;+;+;+;+;+;+;+;+;+;+;+;+;+;+;+	8333	34.2682	33.5881	28.0848	27.7666	1.92388e-11	9.30447e-10	0.298875
TM9SF3	10;10;10;10;10;10;10;10;10;10;10;10;10;10;10;10;10;10;10;10;10;10;10;10;10;10;10;10;10;10;10;10;10;10;10;10;10;10	96518109;96522277;96527213;96527213;96527413;96527413;96528031;96528031;96530540;96533051;96543601;96544076;96547895;96547895;96551245;96551245;96551311;96552928;96552928;96552928;96553024;96559659;96559659;96559659;96561978;96561978;96561978;96565304;96565304;96565304;96576345;96576634;96576634;96576634;96577479;96586734;96586734;96587376	96522330;96522330;96527289;96527289;96527545;96527496;96528173;96528177;96530608;96533190;96544206;96544206;96547989;96547989;96551411;96551411;96551411;96552943;96553059;96553059;96553059;96559736;96559736;96559736;96562138;96562138;96562138;96565426;96565426;96565426;96576829;96576829;96576829;96576829;96577542;96586759;96587052;96587452	-;-;-;-;-;-;-;-;-;-;-;-;-;-;-;-;-;-;-;-;-;-;-;-;-;-;-;-;-;-;-;-;-;-;-;-;-;-	7095	24.6805	25.4498	30.8305	31.7171	2.07289e-11	9.99328e-10	-0.301282
C20orf24	20;20;20;20;20;20;20;20;20;20;20;20;20;20;20;20;20;20;20;20;20;20;20;20;20	36605734;36605785;36605789;36605811;36605817;36605822;36607715;36607715;36607715;36607715;36607715;36607715;36607805;36607890;36607890;36609601;36609601;36609601;36609601;36612010;36612010;36612010;36612010;36612010;36612010	36606065;36606065;36606065;36606065;36606065;36606065;36607818;36608193;36607818;36607818;36607818;36607818;36608000;36608000;36608000;36609730;36609730;36609758;36609730;36612557;36612557;36612557;36612557;36612557;36612557	+;+;+;+;+;+;+;+;+;+;+;+;+;+;+;+;+;+;+;+;+;+;+;+;+	1517	15.1969	18.1007	27.2227	26.4949	2.20355e-11	1.05896e-09	-0.672219
DICER1	14;14;14;14;14;14;14;14;14;14;14;14;14;14;14;14;14;14;14;14;14;14;14;14;14;14;14;14;14;14;14;14;14;14;14;14;14;14;14;14;14;14;14;14;14;14;14;14;14;14;14;14;14;14;14;14;14;14;14;14;14;14;14;14;14;14;14;14;14;14;14;14;14;14;14;14;14;14;14;14;14;14;14;14;14;14;14;14;14;14;14;14;14;14;14;14;14;14;14;14;14;14;14;14;14;14;14;14;14;14;14;14;14;14;14;14;14;14;14;14;14;14;14;14;14;14;14;14;14;14;14;14;14;…	95086228;95086228;95086229;95088665;95090321;95090468;95090492;95090513;95090665;95091034;95091034;95091034;95091034;95091034;95091034;95091034;95091203;95091203;95091203;95091203;95091203;95091203;95091203;95093888;95093888;95093888;95093888;95093888;95093888;95095346;95095825;95095825;95095825;95095825;95095825;95095825;95099780;95099780;95099780;95099780;95099780;95099780;95099780;95103346;951…	95090663;95090663;95090663;95089008;95090663;95090663;95090663;95090663;95091109;95091109;95091109;95091109;95091109;95091109;95091109;95091109;95091422;95091365;95091322;95091365;95091365;95091365;95091365;95094156;95094156;95094156;95094156;95094156;95094156;95096713;95096713;95096713;95096713;95096713;95096713;95096713;95099935;95099935;95099935;95099935;95099935;95099935;95099935;95103430;951…	-;-;-;-;-;-;-;-;-;-;-;-;-;-;-;-;-;-;-;-;-;-;-;-;-;-;-;-;-;-;-;-;-;-;-;-;-;-;-;-;-;-;-;-;-;-;-;-;-;-;-;-;-;-;-;-;-;-;-;-;-;-;-;-;-;-;-;-;-;-;-;-;-;-;-;-;-;-;-;-;-;-;-;-;-;-;-;-;-;-;-;-;-;-;-;-;-;-;-;-;-;-;-;-;-;-;-;-;-;-;-;-;-;-;-;-;-;-;-;-;-;-;-;-;-;-;-;-	12294	3.72821	3.78886	5.34955	5.37619	2.21787e-11	1.06248e-09	-0.494822
MB21D1	6;6;6;6;6;6;6;6;6;6;6;6;6	73413515;73423709;73425464;73428709;73428709;73439743;73440209;73440209;73445528;73445528;73445528;73451525;73451525	73414021;73425578;73425578;73428811;73428811;73440445;73440445;73440445;73445685;73445747;73445747;73452259;73452276	-;-;-;-;-;-;-;-;-;-;-;-;-	4155	7.71527	7.49195	4.43067	4.98942	2.29848e-11	1.09763e-09	0.709773
FAM105A	5;5;5;5;5;5;5;5;5;5;5;5;5;5	14581775;14600965;14600965;14601213;14601213;14601351;14602183;14602183;14607330;14607330;14608748;14610141;14610338;14614531	14581958;14601124;14601124;14601244;14601244;14601442;14602332;14602332;14607370;14607458;14609017;14612720;14610441;14615007	+;+;+;+;+;+;+;+;+;+;+;+;+;+	4074	22.1439	22.3777	16.8982	16.8236	2.35465e-11	1.12093e-09	0.418714
WTAP	6;6;6;6;6;6;6;6;6;6;6;6;6;6;6;6;6;6;6;6;6;6;6;6;6;6;6;6;6;6;6;6;6;6;6;6;6;6;6;6	159725585;159726998;159727500;159727530;159727566;159727588;159736258;159736258;159736258;159736258;159736258;159736258;159738990;159738990;159738990;159738990;159738990;159741593;159742088;159742088;159742088;159742088;159742088;159743665;159743665;159743665;159743665;159743665;159743665;159748191;159748191;159748191;159748191;159748191;159748590;159748590;159753460;159753460;159755028;159755028	159727333;159727333;159727703;159727703;159727703;159727703;159736295;159736718;159736295;159736295;159736295;159736295;159739045;159739045;159739045;159739045;159739045;159742146;159742146;159742146;159742146;159742146;159742146;159743694;159743792;159743792;159743792;159743792;159743792;159749415;159748369;159748369;159748369;159748369;159749421;159749416;159753614;159753614;159756317;159756319	+;+;+;+;+;+;+;+;+;+;+;+;+;+;+;+;+;+;+;+;+;+;+;+;+;+;+;+;+;+;+;+;+;+;+;+;+;+;+;+	5830	8.81339	8.94573	13.5386	11.974	2.37258e-11	1.12594e-09	-0.505255
C15orf57	15;15;15;15;15;15;15;15;15;15;15;15;15;15;15;15;15;15;15;15;15;15;15;15;15;15;15;15;15;15;15;15;15;15;15;15;15;15;15;15;15;15;15;15;15;15;15;15;15;15;15;15;15;15;15;15;15	40528683;40531331;40531341;40534343;40534900;40539229;40539235;40539239;40553099;40553104;40553437;40553595;40553942;40553980;40554018;40556621;40557216;40557216;40557216;40557216;40557216;40557216;40557216;40557216;40557216;40557216;40557216;40557216;40561981;40561999;40562772;40562772;40562772;40562772;40562772;40562772;40562772;40562772;40562772;40562772;40562772;40562772;40562772;40562772;405…	40528790;40532302;40532302;40539355;40535010;40539355;40539355;40539355;40554127;40554127;40554127;40554127;40554127;40554127;40554127;40557372;40557372;40557372;40557372;40557372;40557372;40557372;40557372;40557372;40557372;40557372;40557372;40557372;40562007;40562206;40563027;40562803;40563022;40563027;40563027;40563027;40563027;40563027;40563027;40563027;40563027;40563027;40563027;40563027;405…	-;-;-;-;-;-;-;-;-;-;-;-;-;-;-;-;-;-;-;-;-;-;-;-;-;-;-;-;-;-;-;-;-;-;-;-;-;-;-;-;-;-;-;-;-;-;-;-;-;-;-;-;-;-;-;-;-	8648	9.2172	8.99629	6.78899	6.70782	2.55372e-11	1.20812e-09	0.450288
ERLIN2	8;8;8;8;8;8;8;8;8;8;8;8;8;8;8;8;8;8;8;8;8;8;8;8;8;8;8;8;8;8;8;8;8;8;8;8;8;8;8;8;8;8;8;8;8;8;8;8;8;8;8;8;8;8;8;8;8;8;8;8;8;8;8;8;8;8;8;8;8;8;8;8;8;8;8;8;8;8;8;8;8;8;8;8	37736599;37736601;37736623;37736625;37736627;37736681;37736685;37736692;37737008;37737566;37737908;37737908;37737908;37737908;37737908;37737908;37737908;37737908;37737908;37740365;37740365;37740365;37740365;37740365;37740365;37740365;37740365;37740365;37740365;37741772;37741772;37741772;37741772;37741772;37741772;37741772;37741772;37741772;37744355;37744355;37744355;37744355;37744355;37744355;377…	37736678;37736678;37736678;37736678;37736678;37737007;37737007;37737262;37737114;37738029;37738029;37738029;37738029;37738029;37738029;37738029;37738029;37738029;37738029;37740446;37740446;37740446;37740446;37740446;37740446;37740446;37740446;37740446;37740714;37741818;37741818;37741818;37741818;37741818;37741818;37741818;37741818;37741818;37744416;37744416;37744416;37744416;37744416;37744416;377…	+;+;+;+;+;+;+;+;+;+;+;+;+;+;+;+;+;+;+;+;+;+;+;+;+;+;+;+;+;+;+;+;+;+;+;+;+;+;+;+;+;+;+;+;+;+;+;+;+;+;+;+;+;+;+;+;+;+;+;+;+;+;+;+;+;+;+;+;+;+;+;+;+;+;+;+;+;+;+;+;+;+;+;+	9464	7.03395	6.90877	5.13783	4.86284	2.66458e-11	1.25666e-09	0.497022
NAT10	11;11;11;11;11;11;11;11;11;11;11;11;11;11;11;11;11;11;11;11;11;11;11;11;11;11;11;11;11;11;11;11;11;11;11;11;11;11;11;11;11;11;11;11;11;11;11;11;11;11;11;11;11;11;11;11;11;11;11;11;11;11;11;11;11;11;11;11;11;11;11;11;11;11;11;11;11;11;11;11;11;11;11;11;11;11;11;11;11;11;11;11;11;11;11;11;11;11;11;11;11;11;11;11;11;11;11;11;11	34105602;34105617;34105617;34106029;34106039;34107053;34107053;34108209;34108211;34108211;34108211;34108211;34108742;34108742;34108742;34108742;34112052;34112052;34112052;34112052;34113716;34113716;34113716;34113716;34113803;34115823;34115823;34115823;34115823;34118180;34118180;34118180;34118180;34118396;34118396;34118396;34118396;34122459;34122459;34122459;34123762;34123762;34123762;34124302;341…	34105792;34105792;34105792;34106074;34106147;34107319;34107319;34108333;34108333;34108333;34108323;34108333;34108833;34108833;34108833;34108833;34112223;34112223;34112223;34112223;34113780;34113838;34113838;34113838;34113838;34115884;34115884;34115884;34115884;34118294;34118294;34118294;34118294;34118503;34118503;34118503;34118503;34122592;34122592;34122592;34123855;34123855;34123855;34124400;341…	+;+;+;+;+;+;+;+;+;+;+;+;+;+;+;+;+;+;+;+;+;+;+;+;+;+;+;+;+;+;+;+;+;+;+;+;+;+;+;+;+;+;+;+;+;+;+;+;+;+;+;+;+;+;+;+;+;+;+;+;+;+;+;+;+;+;+;+;+;+;+;+;+;+;+;+;+;+;+;+;+;+;+;+;+;+;+;+;+;+;+;+;+;+;+;+;+;+;+;+;+;+;+;+;+;+;+;+;+	5242	28.6426	28.525	36.12	35.7007	2.68366e-11	1.26174e-09	-0.311257
DLX1	2;2;2;2;2;2;2;2;2;2;2;2;2;2;2;2;2;2	172084740;172084749;172085226;172085312;172085536;172085557;172085611;172086267;172086654;172086654;172086654;172086654;172087367;172088003;172088003;172088003;172088003;172088003	172084881;172084881;172085990;172085990;172085990;172085990;172085990;172086853;172087138;172086853;172086854;172086853;172087568;172089677;172089312;172089677;172088373;172088051	+;+;+;+;+;+;+;+;+;+;+;+;+;+;+;+;+;+	3656	19.4893	19.7061	14.5618	14.0796	2.69433e-11	1.26284e-09	0.470277
SPTAN1	9;9;9;9;9;9;9;9;9;9;9;9;9;9;9;9;9;9;9;9;9;9;9;9;9;9;9;9;9;9;9;9;9;9;9;9;9;9;9;9;9;9;9;9;9;9;9;9;9;9;9;9;9;9;9;9;9;9;9;9;9;9;9;9;9;9;9;9;9;9;9;9;9;9;9;9;9;9;9;9;9;9;9;9;9;9;9;9;9;9;9;9;9;9;9;9;9;9;9;9;9;9;9;9;9;9;9;9;9;9;9;9;9;9;9;9;9;9;9;9;9;9;9;9;9;9;9;9;9;9;9;9;9;9;9;9;9;9;9;9;9;9;9;9;9;9;9;9;9;9;9;9;9;9;9;9;9;9;9;9;9;9;9;9;9;9;9;9;9;9;9;9;9;9;9;9;9;9;9;9;9;9;9;9;9;9;9;9;9;9;9;9;9;9;9;9;9;9;9;9…	128552558;128552587;128552590;128552590;128552590;128552593;128552603;128552746;128552969;128553081;128553147;128553322;128553332;128555349;128566738;128566738;128566738;128566738;128566738;128566738;128566738;128566738;128566738;128566738;128566738;128566741;128568772;128568772;128568772;128568772;128568772;128568772;128568772;128574675;128574675;128574675;128574675;128574675;128574675;128574675…	128552696;128552696;128552696;128552696;128552696;128552696;128552696;128552805;128553031;128553337;128553311;128553382;128553362;128555399;128566776;128566806;128566774;128566777;128566977;128566977;128566977;128566977;128566977;128566977;128566977;128566977;128568897;128568897;128568897;128568897;128568897;128568897;128568897;128574815;128574815;128574815;128574815;128574815;128574735;128574815…	+;+;+;+;+;+;+;+;+;+;+;+;+;+;+;+;+;+;+;+;+;+;+;+;+;+;+;+;+;+;+;+;+;+;+;+;+;+;+;+;+;+;+;+;+;+;+;+;+;+;+;+;+;+;+;+;+;+;+;+;+;+;+;+;+;+;+;+;+;+;+;+;+;+;+;+;+;+;+;+;+;+;+;+;+;+;+;+;+;+;+;+;+;+;+;+;+;+;+;+;+;+;+;+;+;+;+;+;+;+;+;+;+;+;+;+;+;+;+;+;+;+;+;+;+;+;+;+	16226	9.18328	9.22093	11.4571	11.6668	2.82251e-11	1.31885e-09	-0.311328
RP13-270P17.1	18;18;18;18;18;18	3255436;3255438;3256242;3256242;3261272;3261610	3255838;3255838;3256322;3256322;3261822;3261850	-;-;-;-;-;-	1063	121.954	116.582	94.2937	92.8684	3.09844e-11	1.44334e-09	0.367888
NR2F1	5;5;5;5;5;5;5;5;5;5;5;5;5	93583337;93585024;93585183;93587101;93587460;93587917;93587917;93587917;93587917;93591973;93593562;93593562;93593562	93585486;93585107;93585486;93587243;93587571;93588444;93588333;93588388;93588444;93592186;93594143;93594072;93594615	+;+;+;+;+;+;+;+;+;+;+;+;+	4201	0.6819	0.776585	2.19646	1.95825	3.14423e-11	1.46019e-09	-1.49146
HLA-A	6;6;6;6;6;6;6;6;6;6;6;6;6;6;6;6;6;6;6;6;6;6;6;6;6;6;6;6;6;6;6;6;6;6;6;6;6;6;6;6;6;6;6;6;6;6;6;6;6;6;6;6;6;6;6;6;6	29941260;29941966;29942245;29942404;29942470;29942548;29942549;29942552;29942554;29942554;29942757;29942757;29942757;29942757;29942757;29942757;29942757;29942757;29943268;29943268;29943268;29943268;29943285;29944122;29944122;29944122;29944122;29944122;29944122;29944122;29944122;29944500;29944500;29944500;29944500;29944500;29944500;29944500;29945059;29945059;29945059;29945059;29945059;29945063;299…	29941319;29942096;29942626;29942626;29942626;29942626;29942626;29942626;29942626;29942626;29943543;29943543;29943543;29943026;29942854;29943026;29943026;29943026;29943543;29943543;29943543;29943543;29943543;29944397;29944397;29944397;29944397;29944397;29944397;29944397;29944397;29944634;29944616;29944616;29945091;29944616;29944634;29944616;29945091;29945091;29945091;29945091;29945091;29945091;299…	+;+;+;+;+;+;+;+;+;+;+;+;+;+;+;+;+;+;+;+;+;+;+;+;+;+;+;+;+;+;+;+;+;+;+;+;+;+;+;+;+;+;+;+;+;+;+;+;+;+;+;+;+;+;+;+;+	2710	98.8445	99.5684	81.8516	81.8236	3.22079e-11	1.49119e-09	0.295612
MYC	8;8;8;8;8;8;8;8;8;8;8;8;8;8;8;8;8;8;8;8	127735434;127735519;127736069;127736069;127736084;127736220;127736231;127736441;127738248;127738248;127738248;127738248;127738251;127738251;127738292;127740396;127740396;127740396;127740396;127740398	127736623;127735836;127736623;127736623;127736623;127736623;127736623;127736623;127739019;127739019;127739019;127739019;127739019;127738772;127738475;127741434;127741372;127741434;127741432;127740477	+;+;+;+;+;+;+;+;+;+;+;+;+;+;+;+;+;+;+;+	3001	51.9104	51.1095	63.6805	65.6968	3.31603e-11	1.53061e-09	-0.310555
MUC19	12;12;12;12;12;12;12;12;12;12;12;12;12;12;12;12;12;12;12;12;12;12;12;12;12;12;12;12;12;12;12;12;12;12;12;12;12;12;12;12;12;12;12;12;12;12;12;12;12;12;12;12;12;12;12;12;12;12;12;12;12;12;12;12;12;12;12;12;12;12;12;12;12;12;12;12;12;12;12;12;12;12;12;12;12;12;12;12;12;12;12;12;12;12;12;12;12;12;12;12;12;12;12;12;12;12;12;12;12;12;12;12;12;12;12;12;12;12;12;12;12;12;12;12;12;12;12;12;12;12;12;12;12;…	40393395;40397879;40400041;40406024;40408226;40412033;40414468;40414795;40415046;40416048;40416318;40418130;40419174;40420207;40421213;40421840;40422104;40426160;40426407;40427374;40427374;40427970;40427970;40429542;40431626;40432378;40432627;40433764;40436097;40436617;40438128;40440574;40440724;40441061;40441872;40443076;40443266;40444077;40444389;40445519;40446488;40447325;40448166;40449689;404…	40393499;40397911;40400067;40406173;40408375;40412182;40414653;40414959;40415228;40416230;40416359;40418180;40419233;40420435;40421323;40421900;40422201;40426617;40426617;40427496;40427496;40428071;40428093;40429677;40431718;40432462;40432764;40433913;40436191;40436743;40438374;40440626;40440824;40441212;40442010;40443180;40443460;40444316;40444545;40445644;40446629;40447356;40448195;40449730;404…	+;+;+;+;+;+;+;+;+;+;+;+;+;+;+;+;+;+;+;+;+;+;+;+;+;+;+;+;+;+;+;+;+;+;+;+;+;+;+;+;+;+;+;+;+;+;+;+;+;+;+;+;+;+;+;+;+;+;+;+;+;+;+;+;+;+;+;+;+;+;+;+;+;+;+;+;+;+;+;+;+;+;+;+;+;+;+;+;+;+;+;+;+;+;+;+;+;+;+;+;+;+;+;+;+;+;+;+;+;+;+;+;+;+;+;+;+;+;+;+;+;+;+;+;+;+;+;+	29490	0.274459	0.271962	0.09663	0.0956442	3.33036e-11	1.53257e-09	1.52279
SKA3	13;13;13;13;13;13;13;13;13;13;13;13;13;13;13;13;13;13;13;13;13;13;13;13;13;13;13;13;13;13;13;13;13;13;13;13;13;13;13	21153595;21153595;21153595;21154697;21155693;21155693;21155693;21157922;21157922;21157922;21159902;21159902;21159902;21161790;21161790;21161790;21161790;21167988;21167988;21167988;21167988;21168222;21172269;21172339;21172339;21172339;21172339;21172339;21172620;21172620;21172620;21172620;21172620;21176348;21176375;21176375;21176375;21176375;21176375	21155150;21155150;21155150;21155150;21155811;21155811;21155811;21158125;21158125;21158125;21159987;21159987;21159987;21161875;21161875;21161875;21161875;21168399;21168399;21168399;21168399;21168399;21172504;21172504;21172504;21172504;21172504;21172504;21172713;21172681;21172681;21172681;21172681;21176551;21176473;21176551;21176602;21176548;21176547	-;-;-;-;-;-;-;-;-;-;-;-;-;-;-;-;-;-;-;-;-;-;-;-;-;-;-;-;-;-;-;-;-;-;-;-;-;-;-	3048	16.2161	15.2376	22.7644	22.0394	3.48329e-11	1.59811e-09	-0.492453
LONP1	19;19;19;19;19;19;19;19;19;19;19;19;19;19;19;19;19;19;19;19;19;19;19;19;19;19;19;19;19;19;19;19;19;19;19;19;19;19;19;19;19;19;19;19;19;19;19;19;19;19;19;19;19;19;19;19;19;19;19;19;19;19;19;19;19;19;19;19;19;19;19;19;19;19;19;19;19;19;19;19;19;19;19;19;19;19;19;19;19;19;19;19;19;19;19;19;19;19;19;19;19;19;19;19;19;19;19;19;19;19;19;19;19;19;19;19;19;19;19;19;19;19;19;19;19;19;19;19;19;19;19;19;19;…	5691834;5691834;5691835;5691835;5691835;5691835;5691955;5691993;5693298;5693298;5693298;5693298;5693298;5693298;5693298;5693298;5693552;5693552;5693552;5693552;5693552;5693552;5693552;5693552;5694387;5694387;5694387;5694387;5694387;5694387;5694387;5694387;5694761;5694761;5694761;5694761;5694761;5694761;5694761;5696054;5696054;5696054;5696054;5696054;5696054;5696054;5696249;5696249;5696249;5696249…	5692208;5692208;5692208;5692208;5692208;5692208;5692208;5692242;5693462;5693462;5693462;5693462;5693462;5693462;5693462;5693462;5693769;5693769;5693769;5693769;5693769;5693769;5693769;5693769;5694546;5694552;5694552;5694552;5694552;5694552;5694552;5694552;5694901;5694901;5694901;5694901;5694901;5694901;5694901;5696170;5696170;5696170;5696170;5696170;5696170;5696170;5696371;5696371;5696371;5696371…	-;-;-;-;-;-;-;-;-;-;-;-;-;-;-;-;-;-;-;-;-;-;-;-;-;-;-;-;-;-;-;-;-;-;-;-;-;-;-;-;-;-;-;-;-;-;-;-;-;-;-;-;-;-;-;-;-;-;-;-;-;-;-;-;-;-;-;-;-;-;-;-;-;-;-;-;-;-;-;-;-;-;-;-;-;-;-;-;-;-;-;-;-;-;-;-;-;-;-;-;-;-;-;-;-;-;-;-;-;-;-;-;-;-;-;-;-;-;-;-;-;-;-;-;-;-;-;-	5085	95.377	96.5577	80.0834	78.5889	3.71312e-11	1.69842e-09	0.292468
EVI5L	19;19;19;19;19;19;19;19;19;19;19;19;19;19;19;19;19;19;19;19;19;19;19;19;19;19;19;19;19;19;19;19;19;19;19;19;19;19;19;19;19;19;19;19;19;19;19;19;19;19;19;19;19;19;19;19;19;19;19;19;19;19	7830233;7846496;7846543;7847732;7847732;7848910;7848921;7848921;7849256;7849256;7849256;7849997;7849997;7849997;7850021;7851434;7851434;7851434;7851434;7851489;7851681;7851681;7851681;7851681;7851681;7852807;7853086;7853086;7853086;7853086;7853273;7853273;7853273;7853273;7853502;7856015;7856015;7856015;7856979;7857092;7858191;7858191;7858193;7858408;7860561;7860561;7860585;7861878;7861878;7861878…	7830381;7846679;7846679;7847921;7847921;7849145;7849145;7849145;7849330;7849330;7849330;7850122;7850122;7850122;7850122;7851577;7851577;7851577;7851577;7851577;7851770;7851770;7851770;7851770;7851770;7853006;7853183;7853183;7853183;7853183;7853333;7853333;7853333;7853333;7853616;7856068;7856068;7856068;7859190;7857124;7858331;7858331;7858331;7858506;7860689;7860689;7860689;7862018;7862018;7862018…	+;+;+;+;+;+;+;+;+;+;+;+;+;+;+;+;+;+;+;+;+;+;+;+;+;+;+;+;+;+;+;+;+;+;+;+;+;+;+;+;+;+;+;+;+;+;+;+;+;+;+;+;+;+;+;+;+;+;+;+;+;+	6252	5.26566	5.50088	3.63187	3.0377	3.76263e-11	1.71589e-09	0.707184
DNAJC2	7;7;7;7;7;7;7;7;7;7;7;7;7;7;7;7;7;7;7;7;7;7;7;7;7;7;7;7;7;7;7;7;7;7;7;7;7;7;7;7;7;7;7;7;7;7;7;7;7;7;7;7;7;7;7;7;7;7;7;7;7;7;7;7;7;7;7;7;7;7;7;7;7;7;7;7;7;7;7;7;7;7;7;7;7;7;7;7;7;7;7;7;7;7;7;7;7;7	103312474;103312519;103312519;103312522;103312569;103312947;103312947;103312947;103312947;103315764;103315764;103315764;103315764;103315764;103315988;103315988;103315988;103315988;103316703;103316830;103316830;103316830;103316830;103319609;103319609;103319609;103319609;103319756;103319756;103319756;103321932;103321932;103321932;103321932;103322511;103322511;103322511;103322511;103322600;103322703…	103312643;103312643;103312643;103313101;103312643;103313101;103313101;103313101;103313101;103317350;103315871;103315871;103315871;103315871;103316088;103316088;103316088;103316088;103317014;103317014;103317014;103317014;103317014;103319776;103319678;103319678;103319678;103319844;103319844;103319844;103322081;103322081;103322081;103322081;103322794;103322632;103322794;103322632;103322632;103322794…	-;-;-;-;-;-;-;-;-;-;-;-;-;-;-;-;-;-;-;-;-;-;-;-;-;-;-;-;-;-;-;-;-;-;-;-;-;-;-;-;-;-;-;-;-;-;-;-;-;-;-;-;-;-;-;-;-;-;-;-;-;-;-;-;-;-;-;-;-;-;-;-;-;-;-;-;-;-;-;-;-;-;-;-;-;-;-;-;-;-;-;-;-;-;-;-;-;-	6564	33.4381	32.9275	41.5316	40.8859	3.79171e-11	1.71922e-09	-0.29454
KANK2	19;19;19;19;19;19;19;19;19;19;19;19;19;19;19;19;19;19;19;19;19;19;19;19;19;19;19;19;19;19;19;19;19;19;19;19;19;19;19;19;19;19;19;19;19;19;19;19;19;19;19;19;19;19;19;19;19;19;19;19;19;19;19;19;19;19;19	11164267;11164270;11166309;11166558;11169676;11169877;11169877;11169877;11170048;11170048;11170048;11170048;11170048;11170338;11172981;11172981;11172981;11172981;11174473;11174473;11174473;11174473;11175902;11175902;11175902;11175902;11176578;11176578;11176578;11178345;11178345;11178345;11178553;11178553;11178553;11192432;11192831;11192831;11192831;11192881;11193637;11193946;11194475;11194475;111…	11166611;11166611;11166611;11166611;11169966;11169966;11169966;11169966;11170248;11170248;11170248;11170248;11170248;11170415;11173123;11173123;11173123;11173123;11174692;11174692;11174692;11174692;11175989;11175989;11175947;11175989;11176817;11176817;11176817;11178447;11178471;11178447;11178720;11178720;11178720;11194042;11194042;11194042;11194042;11193440;11194042;11194042;11194590;11194590;111…	-;-;-;-;-;-;-;-;-;-;-;-;-;-;-;-;-;-;-;-;-;-;-;-;-;-;-;-;-;-;-;-;-;-;-;-;-;-;-;-;-;-;-;-;-;-;-;-;-;-;-;-;-;-;-;-;-;-;-;-;-;-;-;-;-;-;-	7638	6.92957	6.61461	9.64689	9.3612	3.79532e-11	1.71922e-09	-0.471019
FGD2	6;6;6;6;6;6;6;6;6;6;6;6;6;6;6;6;6;6;6;6;6;6;6;6;6;6;6;6;6;6;6;6;6;6;6;6;6;6;6;6;6;6;6;6;6;6;6;6;6;6;6;6;6;6;6;6;6;6;6;6;6;6;6;6;6;6;6;6;6;6;6;6;6;6;6;6;6;6;6;6;6;6;6;6;6;6;6;6	37005646;37005647;37005655;37005655;37005658;37005699;37005699;37008834;37008834;37008834;37008834;37008834;37008834;37008834;37010973;37010973;37010973;37010973;37010973;37011706;37011706;37011706;37013025;37013234;37013502;37013609;37013609;37013609;37013962;37013962;37013962;37014391;37014581;37014646;37014646;37014646;37014646;37014892;37014892;37014892;37014892;37014892;37014892;37015768;370…	37005885;37005885;37005885;37005885;37005885;37005885;37005885;37009065;37009065;37009065;37009065;37009081;37010031;37009065;37011563;37011050;37011050;37011034;37011050;37011854;37012033;37011854;37013765;37014100;37014100;37014100;37013765;37013765;37014100;37014100;37014100;37014704;37014704;37014704;37014704;37014704;37014704;37015038;37015038;37015038;37015038;37015038;37015038;37015860;370…	+;+;+;+;+;+;+;+;+;+;+;+;+;+;+;+;+;+;+;+;+;+;+;+;+;+;+;+;+;+;+;+;+;+;+;+;+;+;+;+;+;+;+;+;+;+;+;+;+;+;+;+;+;+;+;+;+;+;+;+;+;+;+;+;+;+;+;+;+;+;+;+;+;+;+;+;+;+;+;+;+;+;+;+;+;+;+;+	10167	2.43746	2.66958	1.437	1.61829	3.80387e-11	1.71922e-09	0.759938
CD63	12;12;12;12;12;12;12;12;12;12;12;12;12;12;12;12;12;12;12;12;12;12;12;12;12;12;12;12;12;12;12;12;12;12;12;12;12;12;12;12;12;12;12;12;12;12;12;12;12;12;12;12;12;12;12;12;12;12;12;12;12;12;12;12;12;12;12;12;12;12;12;12;12;12;12;12;12;12;12;12;12;12;12;12;12;12;12;12;12;12;12;12;12;12;12;12;12;12;12;12;12;12	55725323;55725443;55725448;55725448;55725470;55725470;55725470;55725482;55725487;55725507;55725535;55725546;55725553;55725812;55725813;55725813;55725813;55725813;55725813;55725813;55725813;55725813;55725813;55725813;55725813;55725813;55725813;55725819;55726121;55726121;55726121;55726121;55726121;55726121;55726121;55726121;55726121;55726121;55726121;55726121;55726121;55726121;55726700;55726700;557…	55725626;55725626;55725626;55725626;55725626;55725626;55725626;55725626;55725626;55725626;55725626;55725626;55725626;55725896;55725896;55725968;55725896;55725896;55725896;55725896;55725896;55725896;55725896;55725896;55725896;55725896;55725896;55725896;55726261;55726261;55726261;55726261;55726261;55726261;55726261;55726261;55726261;55726261;55726356;55726261;55726261;55726261;55726795;55726795;557…	-;-;-;-;-;-;-;-;-;-;-;-;-;-;-;-;-;-;-;-;-;-;-;-;-;-;-;-;-;-;-;-;-;-;-;-;-;-;-;-;-;-;-;-;-;-;-;-;-;-;-;-;-;-;-;-;-;-;-;-;-;-;-;-;-;-;-;-;-;-;-;-;-;-;-;-;-;-;-;-;-;-;-;-;-;-;-;-;-;-;-;-;-;-;-;-;-;-;-;-;-;-	2633	57.8531	54.9487	44.081	45.5987	4.00673e-11	1.80307e-09	0.349148
IFI44L	1;1;1;1;1;1;1;1;1;1;1;1;1;1;1;1;1;1;1;1;1;1;1;1;1;1;1;1;1;1;1;1;1;1;1;1;1;1;1;1;1;1;1;1;1;1;1;1;1;1;1;1;1	78619922;78620382;78620403;78620449;78620457;78620469;78620878;78625670;78627906;78627906;78627906;78627985;78628951;78628951;78628951;78628951;78628951;78628951;78629635;78629720;78629720;78629720;78629720;78629720;78629720;78629720;78629993;78631441;78635337;78635337;78635337;78635337;78635337;78635337;78636692;78637032;78637032;78637032;78637032;78637100;78641021;78641021;78641021;78641021;786…	78620058;78620571;78620571;78620571;78620571;78620571;78620971;78628999;78628018;78628393;78628207;78628393;78628999;78628999;78628999;78628999;78628999;78628999;78629915;78629915;78629915;78629915;78629915;78629915;78629915;78629915;78630187;78631647;78635983;78635489;78635489;78635489;78635489;78635489;78637203;78637203;78637161;78637203;78637203;78637203;78641121;78641121;78641121;78641121;786…	+;+;+;+;+;+;+;+;+;+;+;+;+;+;+;+;+;+;+;+;+;+;+;+;+;+;+;+;+;+;+;+;+;+;+;+;+;+;+;+;+;+;+;+;+;+;+;+;+;+;+;+;+	10240	0.17318	0.190273	0	0.00459073	4.01807e-11	1.80307e-09	6.03567
SMC2	9;9;9;9;9;9;9;9;9;9;9;9;9;9;9;9;9;9;9;9;9;9;9;9;9;9;9;9;9;9;9;9;9;9;9;9;9;9;9;9;9;9;9;9;9;9;9;9;9;9;9;9;9;9;9;9;9;9;9;9;9;9;9;9;9;9;9;9;9;9;9;9;9;9;9;9;9;9;9;9;9;9;9;9;9;9;9;9	104094260;104094296;104094326;104094564;104095299;104095324;104095324;104096148;104096148;104096148;104098446;104098446;104098446;104098446;104099644;104099644;104099644;104099644;104100093;104100093;104100093;104100093;104100389;104100389;104100389;104100389;104101960;104101960;104101960;104101960;104102424;104102424;104102424;104111581;104111581;104111581;104113316;104113316;104113316;104113964…	104094477;104094448;104094477;104094838;104095552;104095552;104095552;104096297;104096297;104096297;104098568;104098568;104098568;104098568;104099682;104099682;104099682;104099682;104100203;104100203;104100203;104100203;104100433;104100433;104100433;104100433;104102193;104102193;104102193;104102193;104102573;104102573;104102573;104111814;104111814;104111814;104113475;104113475;104113475;104114081…	+;+;+;+;+;+;+;+;+;+;+;+;+;+;+;+;+;+;+;+;+;+;+;+;+;+;+;+;+;+;+;+;+;+;+;+;+;+;+;+;+;+;+;+;+;+;+;+;+;+;+;+;+;+;+;+;+;+;+;+;+;+;+;+;+;+;+;+;+;+;+;+;+;+;+;+;+;+;+;+;+;+;+;+;+;+;+;+	6468	20.0851	19.7625	24.9867	25.5905	4.02503e-11	1.80307e-09	-0.325902
UBA7	3;3;3;3;3;3;3;3;3;3;3;3;3;3;3;3;3;3;3;3;3;3;3;3;3;3;3;3;3;3;3;3;3;3;3;3;3;3;3;3;3;3;3;3;3;3;3;3;3;3;3;3;3;3;3;3	49805207;49805224;49805897;49805897;49806073;49806137;49807736;49808020;49808042;49808386;49808386;49808976;49808976;49809008;49809184;49809390;49809390;49809542;49809575;49809815;49809815;49809815;49809815;49809978;49809978;49809978;49809979;49810263;49810460;49810517;49810517;49810526;49810752;49810752;49810752;49810984;49810984;49810984;49811273;49811273;49811370;49811870;49812109;49812109;498…	49805437;49805437;49806290;49805997;49806165;49806245;49807927;49808112;49808112;49808468;49808468;49809159;49809159;49809725;49809725;49809705;49809464;49809725;49809725;49809879;49809887;49809879;49809879;49810047;49810350;49810183;49810428;49810428;49810672;49810564;49810672;49810672;49810832;49810832;49810832;49811091;49811792;49811091;49811455;49811455;49812016;49812016;49812206;49812206;498…	-;-;-;-;-;-;-;-;-;-;-;-;-;-;-;-;-;-;-;-;-;-;-;-;-;-;-;-;-;-;-;-;-;-;-;-;-;-;-;-;-;-;-;-;-;-;-;-;-;-;-;-;-;-;-;-	4545	12.2156	12.0731	8.7777	8.20203	4.09126e-11	1.82735e-09	0.53395
ELF1	13;13;13;13;13;13;13;13;13;13;13;13;13;13;13;13;13;13;13;13;13;13;13;13;13;13;13;13;13;13;13;13;13;13;13;13;13;13;13;13;13;13;13	40931920;40932028;40932034;40933352;40933439;40940921;40940921;40940921;40940921;40940921;40942952;40942952;40942952;40942952;40942952;40943842;40943842;40943842;40943842;40943842;40949806;40949806;40949806;40949806;40951329;40951329;40951329;40951329;40951584;40958836;40958836;40958836;40958836;40981983;40981983;40981983;40981983;40981983;40982205;40982858;41019228;41060838;41060838	40934028;40934028;40934028;40934028;40934028;40941370;40941370;40941370;40941370;40941370;40943144;40943144;40943144;40943144;40943144;40943925;40943925;40943925;40943925;40943925;40949973;40949901;40949973;40949973;40951436;40951436;40951436;40951436;40951701;40959016;40959016;40959016;40959016;40982282;40982225;40982282;40982282;40982242;40982282;40982899;41019314;41061440;41060940	-;-;-;-;-;-;-;-;-;-;-;-;-;-;-;-;-;-;-;-;-;-;-;-;-;-;-;-;-;-;-;-;-;-;-;-;-;-;-;-;-;-;-	4443	76.4909	76.0394	93.732	95.5524	4.3584e-11	1.94096e-09	-0.293441
ERV3-1	7;7;7;7;7;7	64990809;65003669;65006084;65006541;65006541;65006541	64993414;65005194;65006322;65006743;65006653;65006659	-;-;-;-;-;-	4574	16.2637	16.494	12.5787	11.1408	4.41965e-11	1.96248e-09	0.48294
DAP	5;5;5;5;5;5;5;5;5;5;5;5;5;5;5;5;5;5;5	10679230;10680434;10681091;10683096;10683309;10683529;10733772;10748083;10748175;10748175;10748175;10748175;10748175;10761014;10761014;10761014;10761014;10761014;10761014	10681169;10681169;10681169;10683571;10683571;10683571;10734268;10748271;10748271;10748271;10748271;10748271;10748271;10761101;10761225;10761199;10761228;10761136;10761272	-;-;-;-;-;-;-;-;-;-;-;-;-;-;-;-;-;-;-	3361	13.7725	12.9288	20.0792	18.4903	4.66359e-11	2.06476e-09	-0.512865
IGF2	11;11;11;11;11;11;11;11;11;11;11;11;11;11;11;11;11;11;11;11;11;11;11;11;11;11;11;11;11	2129112;2129112;2129112;2132500;2132640;2132673;2132716;2133517;2133517;2133517;2133517;2133517;2133517;2133517;2135367;2135367;2135367;2135367;2135367;2135367;2135367;2137188;2137188;2137192;2138229;2138229;2140135;2140857;2140857	2133223;2133223;2133223;2133223;2133223;2133223;2133223;2133665;2133665;2133665;2133674;2133674;2133665;2133665;2135529;2135529;2135529;2135529;2135529;2135529;2135529;2137287;2137290;2137305;2139389;2138974;2140299;2141016;2141238	-;-;-;-;-;-;-;-;-;-;-;-;-;-;-;-;-;-;-;-;-;-;-;-;-;-;-;-;-	6259	1.39486	1.35377	2.88346	2.52358	4.91236e-11	2.16858e-09	-0.958772
CTD-2231E14.2	19	16074293	16077395	-	3103	99.8512	99.9687	81.6159	83.5802	4.94499e-11	2.17666e-09	0.292539
ARHGAP19	10;10;10;10;10;10;10;10;10;10;10;10;10;10;10;10;10;10;10;10;10;10;10;10;10;10;10;10;10;10;10;10;10;10;10;10;10;10;10;10;10;10;10;10;10;10;10;10;10;10;10;10;10;10;10;10;10;10;10;10;10;10	97222173;97222173;97222176;97222180;97225309;97229147;97229147;97229147;97229147;97229147;97229764;97229764;97229764;97229764;97229764;97235217;97235217;97235217;97235217;97235217;97243968;97243968;97243968;97243968;97243968;97246272;97246272;97246272;97246272;97246272;97256318;97256318;97256318;97256463;97258660;97259402;97259402;97259402;97259402;97259430;97263420;97263420;97263420;97263420;972…	97226132;97226132;97226132;97226132;97226132;97229225;97229225;97229225;97229225;97229225;97229874;97229874;97229874;97229874;97229874;97235315;97235315;97235315;97235315;97235315;97244159;97244159;97244159;97244159;97244159;97246337;97246337;97246337;97246337;97246337;97256404;97256404;97256404;97256515;97258754;97259628;97259628;97259628;97259628;97259628;97263629;97263629;97263629;97263629;972…	-;-;-;-;-;-;-;-;-;-;-;-;-;-;-;-;-;-;-;-;-;-;-;-;-;-;-;-;-;-;-;-;-;-;-;-;-;-;-;-;-;-;-;-;-;-;-;-;-;-;-;-;-;-;-;-;-;-;-;-;-;-	6167	7.32901	6.58329	10.327	9.93236	5.05874e-11	2.22029e-09	-0.524268
TRIM22	11;11;11;11;11;11;11;11;11;11;11;11;11;11;11;11;11;11;11;11;11;11;11;11;11;11;11;11;11;11;11;11;11;11;11;11;11;11;11;11;11;11;11;11;11;11;11;11;11;11;11;11;11;11;11;11	5689689;5689697;5689773;5689821;5689880;5691027;5696167;5696167;5696167;5696167;5696167;5696492;5696502;5697248;5697248;5697248;5697248;5697248;5698315;5698315;5698315;5698315;5698315;5698480;5706550;5706594;5706594;5706594;5706594;5706594;5708173;5708173;5708173;5708173;5708173;5708173;5708208;5708208;5708577;5708577;5708577;5708577;5708577;5708577;5708577;5708577;5709053;5709053;5709053;5709053…	5689899;5689704;5689899;5689899;5689899;5691176;5696655;5697013;5696655;5696655;5696655;5696655;5696655;5697343;5697343;5698545;5697343;5697343;5698417;5698476;5698406;5698545;5698545;5698545;5706616;5706616;5706616;5706616;5706616;5706616;5708273;5708273;5708273;5708273;5708273;5708273;5708273;5708273;5708603;5708603;5708603;5708603;5708603;5708603;5708603;5708603;5709137;5709317;5709447;5709163…	+;+;+;+;+;+;+;+;+;+;+;+;+;+;+;+;+;+;+;+;+;+;+;+;+;+;+;+;+;+;+;+;+;+;+;+;+;+;+;+;+;+;+;+;+;+;+;+;+;+;+;+;+;+;+;+	6020	26.9728	27.6611	21.6618	22.5675	5.20589e-11	2.27829e-09	0.322862
TRIM16	17;17;17;17;17;17;17;17;17;17;17;17;17;17;17;17;17;17;17;17;17;17;17;17;17;17;17;17;17;17;17;17;17;17;17;17;17;17;17;17;17;17;17;17;17;17;17;17;17;17;17;17;17;17;17;17;17;17;17;17;17;17;17;17;17;17;17;17;17;17;17;17;17;17;17;17;17;17;17;17;17;17;17;17;17;17;17;17;17;17;17;17;17;17;17;17;17;17;17;17;17;17;17;17;17;17;17;17;17;17;17;17;17;17;17;17;17;17;17;17;17;17;17;17;17;17;17;17;17;17;17;17	15627960;15627960;15627960;15627966;15627967;15628648;15628696;15628874;15629161;15631619;15631619;15631619;15631619;15631619;15631619;15631619;15631659;15632509;15632509;15632509;15632509;15632509;15632509;15632531;15632594;15632632;15636036;15636036;15636036;15636036;15636036;15636036;15636036;15636036;15636036;15636036;15636204;15636206;15636222;15642721;15642721;15642721;15642721;15642721;156…	15629198;15629198;15629198;15628061;15629198;15629198;15629198;15629198;15629198;15632035;15631714;15631714;15631714;15631714;15631714;15631714;15631714;15632923;15632674;15632674;15632674;15632674;15632674;15632674;15632674;15632674;15636269;15636269;15636269;15636269;15636269;15636269;15636143;15636269;15636269;15636269;15636269;15636269;15636269;15642816;15642816;15642816;15642816;15642816;156…	-;-;-;-;-;-;-;-;-;-;-;-;-;-;-;-;-;-;-;-;-;-;-;-;-;-;-;-;-;-;-;-;-;-;-;-;-;-;-;-;-;-;-;-;-;-;-;-;-;-;-;-;-;-;-;-;-;-;-;-;-;-;-;-;-;-;-;-;-;-;-;-;-;-;-;-;-;-;-;-;-;-;-;-;-;-;-;-;-;-;-;-;-;-;-;-;-;-;-;-;-;-;-;-;-;-;-;-;-;-;-;-;-;-;-;-;-;-;-;-;-;-;-;-;-;-;-;-	5640	8.82811	7.93756	5.58984	5.70111	5.34657e-11	2.33313e-09	0.588521
ABCA7	19;19;19;19;19;19;19;19;19;19;19;19;19;19;19;19;19;19;19;19;19;19;19;19;19;19;19;19;19;19;19;19;19;19;19;19;19;19;19;19;19;19;19;19;19;19;19;19;19;19;19;19;19;19;19;19;19;19;19;19;19;19;19;19;19;19;19;19;19;19;19;19;19;19;19;19;19;19;19;19;19;19;19;19;19;19;19;19;19;19;19;19;19;19;19;19;19;19;19;19;19;19;19;19;19;19;19;19;19;19;19;19;19;19;19;19;19;19;19;19;19;19;19;19;19;19;19;19;19;19;19;19;19;…	1040101;1040103;1040103;1040116;1040118;1040120;1041202;1041205;1041225;1041225;1041225;1041225;1041225;1041246;1041355;1041510;1041510;1041510;1041510;1041510;1041510;1041510;1041516;1041831;1041831;1041831;1041831;1041831;1041831;1042064;1042064;1042064;1042064;1042064;1042315;1042315;1042315;1042315;1042315;1042625;1042746;1042746;1043041;1043041;1043041;1043334;1043334;1043334;1043725;1043725…	1040196;1040196;1040196;1040196;1040196;1040196;1041427;1041427;1041427;1041682;1041427;1041427;1041427;1041427;1041427;1041603;1041603;1042176;1041603;1041603;1041603;1041553;1041603;1041972;1041972;1042104;1041972;1041972;1041972;1042176;1042176;1042176;1042176;1042176;1042397;1042391;1042465;1042397;1042744;1042826;1042826;1042826;1043251;1043251;1043251;1043473;1043473;1043473;1043841;1043841…	+;+;+;+;+;+;+;+;+;+;+;+;+;+;+;+;+;+;+;+;+;+;+;+;+;+;+;+;+;+;+;+;+;+;+;+;+;+;+;+;+;+;+;+;+;+;+;+;+;+;+;+;+;+;+;+;+;+;+;+;+;+;+;+;+;+;+;+;+;+;+;+;+;+;+;+;+;+;+;+;+;+;+;+;+;+;+;+;+;+;+;+;+;+;+;+;+;+;+;+;+;+;+;+;+;+;+;+;+;+;+;+;+;+;+;+;+;+;+;+;+;+;+;+;+;+;+;+	8367	5.49433	5.48049	3.80042	3.70814	5.45258e-11	2.37257e-09	0.565299
HOXA11	7;7;7;7;7	27181510;27181515;27184436;27184436;27185156	27183028;27183028;27184985;27185216;27185223	-;-;-;-;-	2307	3.01562	2.55332	5.97996	5.92963	5.70523e-11	2.47542e-09	-1.0781
C6orf48	6;6;6;6;6;6;6;6;6;6;6;6;6;6;6;6;6;6;6;6;6;6;6;6;6;6;6;6;6;6;6;6;6;6;6;6;6;6;6	31834608;31834627;31834908;31834908;31834908;31834918;31834922;31834932;31835288;31835411;31835411;31835411;31835411;31835411;31835411;31835411;31836295;31836299;31836424;31836843;31837236;31837236;31837236;31837236;31837236;31837236;31837236;31837236;31837236;31839543;31839543;31839543;31839543;31839543;31839543;31839543;31839543;31839543;31839543	31835200;31834768;31835057;31835200;31835200;31835200;31835200;31835200;31835451;31835451;31835455;31835451;31835451;31835451;31835451;31835451;31836517;31836517;31836517;31837435;31837435;31837435;31837435;31837435;31837435;31837435;31837435;31837435;31837435;31839764;31839764;31839761;31839761;31839766;31839761;31839761;31839761;31839761;31839761	+;+;+;+;+;+;+;+;+;+;+;+;+;+;+;+;+;+;+;+;+;+;+;+;+;+;+;+;+;+;+;+;+;+;+;+;+;+;+	1801	42.2392	41.2861	30.3389	31.6352	6.03361e-11	2.61044e-09	0.448756
MYL12A	18;18;18;18;18;18;18;18;18;18;18;18;18;18;18;18;18;18;18;18;18;18;18;18;18;18;18;18;18;18;18;18;18;18;18;18;18	3247481;3247530;3247801;3247813;3247861;3247873;3247907;3249361;3249361;3249361;3249562;3252218;3252275;3252275;3252275;3253233;3253233;3253233;3253233;3253233;3253233;3253233;3253233;3253233;3253889;3253889;3253889;3253889;3253889;3253889;3255524;3255746;3255746;3255746;3255746;3255746;3255746	3247587;3247909;3247909;3247909;3247909;3247909;3248644;3249925;3249443;3249443;3249723;3252482;3252325;3252325;3252325;3253428;3253284;3253748;3253428;3253428;3253688;3253428;3253428;3253428;3254050;3254050;3254050;3254050;3254050;3254050;3255605;3256235;3256126;3256235;3256211;3256236;3256227	+;+;+;+;+;+;+;+;+;+;+;+;+;+;+;+;+;+;+;+;+;+;+;+;+;+;+;+;+;+;+;+;+;+;+;+;+	3245	66.2095	64.0366	53.6372	53.8758	6.07621e-11	2.6214e-09	0.294783
TIFAB	5;5	135444218;135452209	135449949;135452399	-;-	5923	10.0262	9.34843	6.96465	6.67477	6.11295e-11	2.62978e-09	0.524129
MS4A3	11;11;11;11;11;11;11;11;11;11;11;11;11;11;11;11;11;11;11;11;11;11;11;11;11;11;11;11;11;11;11;11;11;11;11;11;11	60056587;60056628;60056628;60056683;60056703;60060932;60061146;60061146;60061146;60061146;60061161;60061490;60061490;60062468;60062468;60064262;60064262;60064262;60064262;60064262;60066951;60066951;60066951;60066951;60066951;60069531;60069574;60069574;60069574;60069574;60069574;60070204;60070204;60070204;60070204;60070204;60070204	60056740;60056740;60056740;60056740;60056740;60061316;60061316;60061316;60061316;60061316;60061316;60061498;60061554;60062605;60062669;60064318;60064318;60064318;60064318;60064318;60067112;60067112;60067112;60067112;60067112;60069675;60069675;60069675;60069675;60069675;60069675;60070233;60070981;60070354;60071128;60071114;60070595	+;+;+;+;+;+;+;+;+;+;+;+;+;+;+;+;+;+;+;+;+;+;+;+;+;+;+;+;+;+;+;+;+;+;+;+;+	2095	8.35622	9.68954	3.99424	5.18334	6.63999e-11	2.84722e-09	0.995509
RPS6KA4	11;11;11;11;11;11;11;11;11;11;11;11;11;11;11;11;11;11;11;11;11;11;11;11;11;11;11;11;11;11;11;11;11;11;11;11;11;11;11;11;11;11;11;11;11;11;11;11;11;11;11;11;11;11;11;11;11;11;11;11;11;11;11;11;11;11;11;11;11;11;11;11;11;11;11;11;11;11;11;11;11;11;11;11;11	64359148;64359171;64359181;64359182;64359182;64359284;64359378;64359378;64359378;64359378;64359378;64359378;64360163;64360163;64360163;64360163;64360163;64360477;64360477;64360477;64360477;64360477;64360517;64360990;64361134;64361134;64361134;64361134;64361134;64361469;64361469;64361469;64361469;64361469;64361469;64361642;64361642;64361642;64361642;64361642;64361642;64361852;64361852;64361852;643…	64359290;64359290;64359290;64359290;64359290;64359290;64359449;64359449;64359788;64359403;64359449;64359449;64360381;64360381;64360381;64360381;64360381;64360592;64360592;64360631;64360592;64360592;64360592;64361241;64361241;64361241;64361241;64361241;64361241;64361549;64361549;64361549;64361549;64361549;64361549;64361745;64361745;64361745;64361745;64361745;64361745;64362002;64362002;64362002;643…	+;+;+;+;+;+;+;+;+;+;+;+;+;+;+;+;+;+;+;+;+;+;+;+;+;+;+;+;+;+;+;+;+;+;+;+;+;+;+;+;+;+;+;+;+;+;+;+;+;+;+;+;+;+;+;+;+;+;+;+;+;+;+;+;+;+;+;+;+;+;+;+;+;+;+;+;+;+;+;+;+;+;+;+;+	3807	15.7422	15.7585	11.3704	11.2985	6.65589e-11	2.84722e-09	0.492535
IFIT3	10;10;10;10	89327894;89332484;89338661;89338661	89328078;89332627;89340971;89340971	+;+;+;+	2640	4.21983	3.50135	1.62767	1.49574	6.70995e-11	2.86228e-09	1.32171
SLC38A2	12;12;12;12;12;12;12;12;12;12;12;12;12;12;12;12;12;12;12;12;12;12;12;12;12;12;12;12;12;12;12;12;12;12;12;12;12;12;12;12;12;12;12;12;12;12;12;12;12;12;12;12;12;12;12;12;12;12;12;12;12;12;12;12;12;12;12;12;12;12;12;12;12;12;12;12;12;12;12;12;12;12;12;12;12;12;12;12;12;12;12;12;12;12;12;12	46358189;46358481;46359385;46360960;46361111;46361118;46361853;46362284;46362284;46362284;46362284;46362284;46362284;46362290;46362325;46362494;46362494;46362494;46362494;46362494;46362494;46362494;46362494;46363021;46363021;46363021;46363021;46363021;46363115;46363726;46363726;46363726;46363726;46363726;46363726;46363726;46363924;46363924;46363924;46363924;46363924;46363924;46363924;46364389;463…	46361209;46361209;46361209;46361209;46361209;46361209;46362381;46362381;46362561;46362381;46362381;46362381;46362381;46362381;46362381;46362638;46362904;46362542;46362638;46362638;46362638;46362638;46362638;46363145;46363145;46363145;46363145;46363145;46363145;46363826;46363826;46363826;46363826;46363826;46363826;46363826;46364003;46364003;46364003;46364003;46364003;46364003;46364003;46364556;463…	-;-;-;-;-;-;-;-;-;-;-;-;-;-;-;-;-;-;-;-;-;-;-;-;-;-;-;-;-;-;-;-;-;-;-;-;-;-;-;-;-;-;-;-;-;-;-;-;-;-;-;-;-;-;-;-;-;-;-;-;-;-;-;-;-;-;-;-;-;-;-;-;-;-;-;-;-;-;-;-;-;-;-;-;-;-;-;-;-;-;-;-;-;-;-;-	6602	20.6279	20.535	15.7031	16.911	7.04403e-11	2.99638e-09	0.354147
TNFSF12-TNFSF13	17;17;17;17;17;17;17;17;17;17;17	7549099;7549474;7550120;7550799;7550943;7556778;7559624;7559846;7560049;7560350;7560724	7549312;7549521;7550195;7550852;7550978;7556902;7559702;7559893;7560167;7560488;7561601	+;+;+;+;+;+;+;+;+;+;+	1816	13.9467	13.3988	8.41874	8.30943	7.4967e-11	3.18002e-09	0.726678
PTPN6	12;12;12;12;12;12;12;12;12;12;12;12;12;12;12;12;12;12;12;12;12;12;12;12;12;12;12;12;12;12;12;12;12;12;12;12;12;12;12;12;12;12;12;12;12;12;12;12;12;12;12;12;12;12;12;12;12;12;12;12;12;12;12;12;12;12;12;12;12;12;12;12;12;12;12;12;12;12;12;12;12;12;12;12;12;12;12;12;12;12;12;12;12;12;12;12;12;12;12;12;12;12;12;12;12;12;12;12;12;12;12;12;12;12;12;12;12;12;12;12;12;12;12;12;12;12;12;12;12;12;12;12;12;…	6946468;6946574;6946577;6946577;6946610;6946710;6951262;6951269;6951271;6951285;6951356;6951356;6951372;6951373;6951373;6951373;6951375;6951435;6951437;6951441;6951459;6951464;6951505;6951609;6951609;6951609;6951609;6951609;6951609;6951609;6951609;6951609;6951609;6951609;6951609;6951609;6951609;6951609;6951912;6951912;6951912;6951983;6951983;6951983;6951983;6951983;6951983;6951983;6951983;6951983…	6946739;6946739;6946739;6946739;6946739;6946739;6951291;6951520;6951520;6951520;6951520;6951515;6951520;6951520;6951520;6951520;6951520;6951520;6951520;6951731;6951520;6951520;6951731;6951731;6951731;6951731;6951731;6951731;6951731;6952177;6953415;6951731;6951731;6951731;6951731;6951731;6951731;6951731;6952177;6952177;6952177;6952177;6952177;6952177;6952177;6952224;6952177;6952177;6952177;6952177…	+;+;+;+;+;+;+;+;+;+;+;+;+;+;+;+;+;+;+;+;+;+;+;+;+;+;+;+;+;+;+;+;+;+;+;+;+;+;+;+;+;+;+;+;+;+;+;+;+;+;+;+;+;+;+;+;+;+;+;+;+;+;+;+;+;+;+;+;+;+;+;+;+;+;+;+;+;+;+;+;+;+;+;+;+;+;+;+;+;+;+;+;+;+;+;+;+;+;+;+;+;+;+;+;+;+;+;+;+;+;+;+;+;+;+;+;+;+;+;+;+;+;+;+;+;+;+;+	5009	62.5372	62.7794	53.1786	50.6129	7.51882e-11	3.18052e-09	0.289725
IQSEC3	12;12;12;12;12;12;12;12;12;12;12;12;12;12;12;12;12;12;12;12;12;12;12;12;12;12;12;12;12;12;12;12;12;12;12;12	66765;77376;99146;99146;125633;138267;138267;141124;141124;157025;157025;157528;157528;161926;161926;163494;163494;165434;165434;165729;165729;168978;169013;169013;169055;171112;171112;171112;171112;171247;171247;174599;174616;175217;176482;178011	67436;77712;99214;99214;125912;139354;139354;141285;141285;157147;157147;157694;157694;162065;162065;163619;163619;165533;165533;165890;165890;169105;169105;169105;169105;171161;171161;171161;171161;171466;171330;178460;174910;175359;176563;178454	+;+;+;+;+;+;+;+;+;+;+;+;+;+;+;+;+;+;+;+;+;+;+;+;+;+;+;+;+;+;+;+;+;+;+;+	7686	0.0236642	0.0235813	0.335444	0.299694	7.54576e-11	3.18305e-09	-3.69082
GNL3	3;3;3;3;3;3;3;3;3;3;3;3;3;3;3;3;3;3;3;3;3;3;3;3;3;3;3;3;3;3;3;3;3;3;3;3;3;3;3;3;3;3;3;3;3;3;3;3;3;3;3;3;3;3;3;3;3;3;3;3;3;3;3;3;3;3;3;3;3;3;3;3;3;3;3;3;3;3;3;3;3;3;3;3	52681156;52685920;52686005;52686016;52686030;52686032;52686032;52686049;52686171;52686177;52686769;52686769;52686769;52686769;52686769;52686769;52686769;52686769;52686769;52687246;52687246;52687246;52687246;52687246;52687246;52687246;52687246;52687246;52687502;52687502;52687502;52687502;52687502;52687502;52687502;52687502;52687502;52688109;52688109;52688109;52688109;52688109;52688109;52688109;526…	52681275;52686105;52686105;52686202;52686105;52686105;52686105;52686105;52686425;52686425;52686827;52686827;52686827;52686827;52686955;52686827;52686827;52686827;52686827;52687383;52687383;52687383;52687383;52687383;52687383;52687383;52687383;52687383;52687616;52687615;52687615;52687827;52687615;52687615;52687615;52687615;52687615;52688190;52688192;52688206;52688192;52688192;52688192;52688192;526…	+;+;+;+;+;+;+;+;+;+;+;+;+;+;+;+;+;+;+;+;+;+;+;+;+;+;+;+;+;+;+;+;+;+;+;+;+;+;+;+;+;+;+;+;+;+;+;+;+;+;+;+;+;+;+;+;+;+;+;+;+;+;+;+;+;+;+;+;+;+;+;+;+;+;+;+;+;+;+;+;+;+;+;+	3318	60.9156	59.2819	73.2055	75.6	7.94072e-11	3.34038e-09	-0.289898
HOXC10	12;12;12;12;12;12;12;12;12;12	53985065;53985186;53985485;53986132;53986338;53986430;53989169;53989169;53989169;53989169	53985097;53986010;53985977;53986193;53986380;53986686;53989675;53989993;53989710;53990279	+;+;+;+;+;+;+;+;+;+	2331	8.30999	7.67828	12.8846	12.9472	8.48951e-11	3.56137e-09	-0.673946
MARCO	2;2;2;2;2;2;2;2;2;2;2;2;2;2;2;2;2;2;2;2;2;2;2	118942166;118942290;118944793;118969160;118969160;118970114;118970114;118971499;118974333;118974521;118977471;118977828;118981409;118981621;118982156;118982348;118990589;118991777;118992432;118993017;118993124;118994387;118994387	118942397;118942397;118944925;118969261;118969261;118970339;118970338;118971534;118974440;118974565;118977515;118977935;118981507;118981656;118982254;118982410;118990633;118991875;118992476;118993300;118993300;118994660;118994658	+;+;+;+;+;+;+;+;+;+;+;+;+;+;+;+;+;+;+;+;+;+;+	2079	8.1362	8.65257	4.50362	4.70317	8.82937e-11	3.69374e-09	0.884669
PPAN	19;19;19;19;19;19;19;19;19;19;19;19;19;19;19;19;19;19;19;19;19;19;19;19;19;19;19;19;19;19;19;19;19;19;19;19;19;19;19;19;19;19;19;19;19;19;19;19;19;19;19	10106289;10106419;10106501;10106639;10106700;10106823;10107505;10107505;10107505;10107505;10107804;10107804;10107804;10107804;10107964;10107964;10107964;10107964;10107990;10109631;10109631;10109631;10109631;10109913;10109913;10109913;10109913;10109962;10110123;10110123;10110123;10110123;10110146;10110324;10110324;10110324;10110324;10110458;10110485;10110485;10110485;10110485;10110697;10110697;101…	10106412;10106671;10106671;10106671;10107005;10107005;10107606;10107606;10107606;10107606;10107854;10107854;10107854;10107854;10108098;10108134;10108134;10108134;10108134;10109707;10109707;10109707;10109707;10110020;10110020;10110020;10110020;10110246;10110241;10110315;10110246;10110246;10110246;10110402;10110402;10110402;10110402;10110614;10110614;10110614;10110614;10110614;10110866;10110829;101…	+;+;+;+;+;+;+;+;+;+;+;+;+;+;+;+;+;+;+;+;+;+;+;+;+;+;+;+;+;+;+;+;+;+;+;+;+;+;+;+;+;+;+;+;+;+;+;+;+;+;+	2583	111.89	114.516	142.508	137.46	9.04095e-11	3.77186e-09	-0.288503
SYF2	1;1;1;1;1;1;1;1;1;1;1;1;1;1;1;1;1	25222679;25222965;25225002;25225002;25227442;25227442;25228118;25228118;25228998;25229015;25230309;25232104;25232104;25232104;25232444;25232444;25232444	25223431;25223431;25225100;25225100;25227532;25227532;25228235;25228235;25229123;25229123;25232211;25232211;25232432;25232211;25232502;25232486;25232493	-;-;-;-;-;-;-;-;-;-;-;-;-;-;-;-;-	3370	179.225	176.191	152.031	143.455	9.30293e-11	3.87053e-09	0.284376
PEA15	1;1;1;1;1;1;1;1;1;1;1;1;1;1;1;1;1;1	160205337;160205380;160205421;160207133;160208464;160211287;160211543;160211543;160211543;160211543;160213110;160213110;160213110;160213110;160213422;160213422;160213422;160213422	160205522;160205522;160205522;160207237;160208665;160211314;160211716;160211716;160211650;160211716;160213265;160213265;160213265;160213265;160213717;160215376;160214035;160215376	+;+;+;+;+;+;+;+;+;+;+;+;+;+;+;+;+;+	2806	44.8875	43.3899	33.9966	35.7343	9.39406e-11	3.89776e-09	0.358504
GFPT1	2;2;2;2;2;2;2;2;2;2;2;2;2;2;2;2;2;2;2;2;2;2;2;2;2;2;2;2;2;2;2;2;2;2;2;2;2;2;2;2;2;2;2;2;2;2;2;2;2;2;2	69319769;69319780;69326914;69326914;69328271;69328271;69329297;69329297;69329684;69329684;69337898;69337898;69338445;69338445;69342152;69342152;69345904;69345904;69348171;69348171;69350078;69350078;69350098;69354259;69354259;69354489;69354489;69354489;69356496;69356496;69356496;69358329;69358329;69358329;69359268;69359268;69359268;69363545;69363545;69363545;69363611;69370001;69370001;69370001;693…	69326233;69326233;69327075;69327075;69328438;69328438;69329424;69329424;69329798;69329798;69338055;69338055;69338565;69338565;69342249;69342249;69345999;69345999;69348334;69348334;69350183;69350183;69350183;69354312;69354312;69354568;69354568;69354568;69356557;69356557;69356557;69358463;69358463;69358463;69359326;69359326;69359326;69363592;69363670;69363670;69363670;69370108;69370108;69370108;693…	-;-;-;-;-;-;-;-;-;-;-;-;-;-;-;-;-;-;-;-;-;-;-;-;-;-;-;-;-;-;-;-;-;-;-;-;-;-;-;-;-;-;-;-;-;-;-;-;-;-;-	8866	5.24151	5.37647	3.55591	3.77515	9.54211e-11	3.94841e-09	0.552658
RP11-363E6.3	8;8;8;8	81279871;81279887;81280595;81281333	81280376;81280376;81280675;81281446	-;-;-;-	701	120.52	113.57	163.119	149.812	9.91164e-11	4.0901e-09	-0.401064
CD68	17;17;17;17;17;17;17;17;17;17;17;17;17;17;17;17;17;17	7579467;7579491;7579638;7579810;7579849;7579891;7580466;7580466;7580466;7580495;7580711;7580711;7580711;7580896;7580896;7580896;7581378;7581378	7579726;7579726;7579726;7580327;7580327;7580327;7580479;7580585;7580585;7580585;7580783;7580783;7580783;7581622;7581066;7581066;7582111;7582113	+;+;+;+;+;+;+;+;+;+;+;+;+;+;+;+;+;+	2189	131.905	126.247	106.581	107.526	9.93842e-11	4.0901e-09	0.287989
ADGRE2	19;19;19;19;19;19;19;19;19;19;19;19;19;19;19;19;19;19;19;19;19;19;19;19;19;19;19;19;19;19;19;19;19;19;19;19;19;19;19;19;19;19;19;19;19;19;19;19;19;19;19;19;19;19;19;19;19;19;19;19;19;19;19;19;19;19;19;19;19;19;19;19;19;19;19;19;19;19;19;19;19;19;19;19;19;19;19;19;19;19;19;19;19;19;19;19;19;19;19;19;19;19;19;19;19;19;19;19;19;19;19;19;19;19;19;19;19;19;19;19;19;19;19;19;19;19;19;19;19;19;19;19;19;…	14732393;14735576;14736079;14736107;14736236;14736236;14736236;14741475;14743420;14743420;14743420;14743420;14743420;14743420;14743420;14743420;14743616;14743616;14743616;14743616;14743616;14743616;14743616;14743616;14743764;14746232;14746232;14746232;14746232;14746232;14746232;14746232;14746232;14746896;14746896;14746896;14746896;14746896;14746896;14746896;14746896;14746896;14751436;14751436;147…	14736244;14736244;14736244;14736244;14736244;14736244;14736244;14742086;14743530;14743530;14743530;14743530;14743530;14743530;14743530;14743530;14743784;14743784;14743784;14743784;14743784;14743784;14743784;14743784;14743784;14746323;14746323;14746323;14746323;14746323;14746323;14746323;14746323;14746962;14746962;14746962;14746962;14746962;14746962;14746962;14746962;14746962;14751671;14751671;147…	-;-;-;-;-;-;-;-;-;-;-;-;-;-;-;-;-;-;-;-;-;-;-;-;-;-;-;-;-;-;-;-;-;-;-;-;-;-;-;-;-;-;-;-;-;-;-;-;-;-;-;-;-;-;-;-;-;-;-;-;-;-;-;-;-;-;-;-;-;-;-;-;-;-;-;-;-;-;-;-;-;-;-;-;-;-;-;-;-;-;-;-;-;-;-;-;-;-;-;-;-;-;-;-;-;-;-;-;-;-;-;-;-;-;-;-;-;-;-;-;-;-;-;-;-;-;-;-	8622	9.62471	9.76443	7.47047	7.28418	1.01372e-10	4.16064e-09	0.41184
ATF4	22;22;22;22;22;22;22;22;22	39519695;39520178;39520564;39520564;39521354;39521354;39521773;39521773;39521773	39519801;39520751;39520751;39521671;39521671;39521671;39522683;39522685;39522683	+;+;+;+;+;+;+;+;+	2514	250.94	246.87	212	202.229	1.06272e-10	4.34999e-09	0.283133
PLK1	16;16;16;16;16;16;16;16;16;16;16;16;16;16;16;16;16;16;16;16;16;16;16;16;16;16;16;16;16;16;16;16;16;16;16;16;16;16;16;16;16;16;16	23677656;23678822;23678869;23678971;23679583;23679732;23680084;23680084;23680084;23680084;23680084;23680914;23680914;23680914;23680914;23680914;23681000;23682064;23682064;23682064;23682064;23683870;23683870;23683870;23683870;23683902;23687137;23687469;23687469;23687469;23688668;23688668;23688668;23688676;23689238;23689238;23689238;23689494;23689494;23689494;23689860;23689860;23689860	23680252;23679340;23679500;23679340;23679665;23679826;23680252;23680242;23680252;23680252;23680252;23681058;23681058;23681022;23681058;23681058;23681054;23682157;23682157;23682157;23682157;23683948;23684089;23684089;23684089;23684089;23687624;23687820;23687624;23687624;23688732;23688745;23688745;23688745;23689392;23689392;23689392;23689772;23689676;23689676;23690038;23690367;23690366	+;+;+;+;+;+;+;+;+;+;+;+;+;+;+;+;+;+;+;+;+;+;+;+;+;+;+;+;+;+;+;+;+;+;+;+;+;+;+;+;+;+;+	4760	9.46672	9.46212	12.99	13.7176	1.1574e-10	4.72481e-09	-0.478377
NCR3LG1	11;11;11;11;11;11;11;11;11;11;11	17351726;17351899;17356651;17356651;17367009;17367009;17368867;17368867;17372006;17372006;17373624	17352039;17352039;17357001;17357001;17367347;17367347;17368964;17368964;17377341;17373474;17373654	+;+;+;+;+;+;+;+;+;+;+	6438	9.98692	11.254	14.4802	14.3189	1.19088e-10	4.84845e-09	-0.421423
CCDC88B	11;11;11;11;11;11;11;11;11;11;11;11;11;11;11;11;11;11;11;11;11;11;11;11;11;11;11;11;11;11;11;11;11;11;11;11;11;11;11;11;11;11;11;11;11;11;11;11;11;11;11;11;11;11;11;11;11;11;11;11;11;11;11;11;11;11;11;11;11;11;11;11;11;11;11;11;11;11;11;11;11;11;11;11;11;11;11;11;11;11;11;11;11;11;11;11;11;11;11;11;11;11;11;11;11;11;11;11;11;11;11;11;11;11;11	64340223;64340223;64340607;64340607;64340907;64340907;64341109;64341109;64341270;64341270;64341421;64341421;64341599;64341599;64341606;64341994;64341994;64341994;64342294;64342294;64342294;64342502;64342522;64342522;64342731;64343179;64343179;64343179;64343179;64343507;64343507;64343507;64343507;64343539;64343778;64343778;64343778;64343778;64343778;64343997;64343997;64343997;64343997;64343997;643…	64340326;64340326;64340752;64340752;64341018;64341018;64341178;64341178;64341328;64341328;64341504;64341504;64341742;64341742;64341742;64342139;64342139;64342139;64342375;64342375;64342375;64342680;64342680;64342680;64342807;64343330;64343325;64343325;64343325;64343615;64343615;64343615;64343615;64343615;64343914;64343914;64343914;64343914;64343914;64345157;64345157;64345157;64345157;64345157;643…	+;+;+;+;+;+;+;+;+;+;+;+;+;+;+;+;+;+;+;+;+;+;+;+;+;+;+;+;+;+;+;+;+;+;+;+;+;+;+;+;+;+;+;+;+;+;+;+;+;+;+;+;+;+;+;+;+;+;+;+;+;+;+;+;+;+;+;+;+;+;+;+;+;+;+;+;+;+;+;+;+;+;+;+;+;+;+;+;+;+;+;+;+;+;+;+;+;+;+;+;+;+;+;+;+;+;+;+;+;+;+;+;+;+;+	8331	42.7909	43.1142	36.1867	35.12	1.20212e-10	4.88111e-09	0.286589
RXFP1	4;4;4;4;4;4;4;4;4;4;4;4;4;4;4;4;4;4;4;4;4;4;4;4;4;4;4;4;4;4;4;4;4;4;4;4;4;4;4;4;4;4;4;4;4;4;4;4;4;4;4;4;4;4;4;4;4;4;4;4;4;4;4;4;4;4;4;4;4;4;4;4;4;4;4;4;4;4;4;4;4;4;4;4;4;4;4;4;4;4;4;4;4;4;4;4;4;4;4;4;4;4;4;4;4;4;4;4;4;4;4;4;4;4;4;4;4;4;4;4;4;4;4;4;4;4;4;4;4;4;4;4;4;4;4;4;4;4;4;4;4;4;4;4;4;4;4;4;4;4;4;4;4;4;4;4;4;4;4;4;4;4;4;4	158315311;158422270;158514845;158521714;158521714;158521714;158521726;158521726;158521976;158521977;158521977;158521977;158543718;158544232;158572698;158572698;158572698;158572698;158572698;158572698;158572698;158572698;158572698;158572698;158593401;158593401;158593401;158593401;158593401;158593401;158593401;158599245;158599326;158599326;158599326;158599326;158599326;158599326;158599326;158599326…	158315470;158422368;158514938;158522025;158522025;158522025;158522025;158522025;158522025;158522025;158522025;158522025;158544168;158544406;158573091;158572835;158572835;158572835;158572835;158572835;158572835;158572835;158572859;158572835;158593499;158593499;158593499;158593499;158593499;158593499;158593499;158599431;158599431;158599431;158599431;158599431;158599431;158599431;158599431;158599431…	+;+;+;+;+;+;+;+;+;+;+;+;+;+;+;+;+;+;+;+;+;+;+;+;+;+;+;+;+;+;+;+;+;+;+;+;+;+;+;+;+;+;+;+;+;+;+;+;+;+;+;+;+;+;+;+;+;+;+;+;+;+;+;+;+;+;+;+;+;+;+;+;+;+;+;+;+;+;+;+;+;+;+;+;+;+;+;+;+;+;+;+;+;+;+;+;+;+;+;+;+;+;+;+;+;+;+;+;+;+;+;+;+;+;+;+;+;+;+;+;+;+;+;+;+;+;+;+	5684	3.27192	2.86187	1.51198	1.7616	1.22862e-10	4.97541e-09	0.925065
RBM19	12;12;12;12;12;12;12;12;12;12;12;12;12;12;12;12;12;12;12;12;12;12;12;12;12;12;12;12;12;12;12;12;12;12;12;12;12;12;12;12;12;12;12;12;12;12;12;12;12;12;12;12;12;12;12;12;12;12;12;12;12;12;12;12;12;12;12;12;12;12;12;12;12;12;12;12;12;12;12;12;12;12;12;12;12;12;12;12;12;12	113816738;113816742;113818103;113822054;113822057;113822687;113823090;113823209;113823209;113844668;113844668;113844668;113844668;113858791;113858791;113858791;113858791;113914969;113914969;113914969;113914969;113918392;113918392;113918392;113918392;113920611;113920611;113920611;113920611;113924697;113924697;113924697;113924697;113927054;113927054;113927054;113927054;113937007;113937007;113937007…	113817925;113818186;113818179;113822646;113823321;113822807;113823321;113823321;113823321;113844788;113844788;113844788;113844788;113858904;113858896;113858896;113858896;113915085;113915085;113915085;113915085;113918447;113918447;113918447;113918447;113920690;113920690;113920690;113920690;113924757;113924757;113924757;113924757;113927431;113927229;113927229;113927229;113937136;113937136;113937136…	-;-;-;-;-;-;-;-;-;-;-;-;-;-;-;-;-;-;-;-;-;-;-;-;-;-;-;-;-;-;-;-;-;-;-;-;-;-;-;-;-;-;-;-;-;-;-;-;-;-;-;-;-;-;-;-;-;-;-;-;-;-;-;-;-;-;-;-;-;-;-;-;-;-;-;-;-;-;-;-;-;-;-;-;-;-;-;-;-;-	5912	23.0046	22.3185	28.5225	28.355	1.24379e-10	5.02345e-09	-0.309592
FAM208A	3;3;3;3;3;3;3;3;3;3;3;3;3;3;3;3;3;3;3;3;3;3;3;3;3;3;3;3;3;3;3;3;3;3;3;3;3;3;3;3;3;3;3;3;3;3;3;3;3;3;3;3;3;3;3;3;3;3;3;3;3;3;3;3;3;3;3;3;3;3;3;3;3;3;3;3;3;3;3;3;3;3;3;3;3;3;3;3;3;3;3;3;3;3;3;3;3	56620133;56620545;56622738;56622859;56622862;56623117;56624479;56624479;56624479;56624479;56624479;56624479;56624828;56624828;56624828;56624828;56624828;56624835;56627037;56627037;56627037;56627037;56627037;56627037;56627037;56627582;56627582;56627582;56627582;56627582;56627582;56627649;56628492;56628492;56628492;56628492;56628492;56628492;56628492;56628744;56633044;56633044;56633044;56633044;566…	56623566;56623566;56623843;56623566;56623566;56623843;56624643;56624643;56624643;56624643;56624643;56624643;56625006;56625006;56625006;56625006;56625006;56625006;56627145;56627070;56627145;56627145;56627145;56627145;56627145;56627741;56627741;56627741;56627741;56627741;56627741;56627741;56628640;56628614;56628614;56628614;56628614;56628614;56628614;56629103;56633843;56633843;56633966;56633843;566…	-;-;-;-;-;-;-;-;-;-;-;-;-;-;-;-;-;-;-;-;-;-;-;-;-;-;-;-;-;-;-;-;-;-;-;-;-;-;-;-;-;-;-;-;-;-;-;-;-;-;-;-;-;-;-;-;-;-;-;-;-;-;-;-;-;-;-;-;-;-;-;-;-;-;-;-;-;-;-;-;-;-;-;-;-;-;-;-;-;-;-;-;-;-;-;-;-	9824	8.50727	8.98944	11.5428	11.2738	1.24926e-10	5.03216e-09	-0.365213
RP11-1348G14.8	16	28822431	28823969	-	1539	2.7773	2.56147	6.31896	6.65886	1.2564e-10	5.04752e-09	-1.26196
RP11-385D13.1	17;17;17;17;17;17;17;17;17;17;17;17;17;17;17;17;17	15571491;15594748;15596514;15598532;15605223;15607574;15612701;15613615;15613833;15615645;15623481;15629027;15631619;15632509;15636036;15642721;15651091	15574183;15594890;15596662;15598653;15605423;15607683;15612823;15613742;15614033;15615809;15623632;15629198;15631714;15632674;15636269;15642816;15651653	-;-;-;-;-;-;-;-;-;-;-;-;-;-;-;-;-	5514	7.71866	6.95205	4.83164	4.93621	1.27855e-10	5.12297e-09	0.604989
ATP6V0A2	12;12;12;12;12;12;12;12;12;12;12;12;12;12;12;12;12;12;12;12;12;12;12;12;12;12;12;12;12;12;12;12;12;12;12;12;12;12;12;12;12;12;12;12;12;12;12;12;12;12;12;12;12;12;12;12;12;12;12;12;12;12;12;12;12;12;12;12;12;12;12	123712318;123712356;123712356;123718623;123718623;123718623;123722351;123722351;123722351;123723210;123724654;123724654;123724654;123726197;123726197;123726197;123726197;123727783;123727783;123727783;123727783;123730642;123733926;123733926;123733926;123733926;123735531;123735531;123735531;123735531;123735531;123737059;123737059;123737059;123737059;123737059;123737547;123738959;123743785;123743785…	123712682;123712682;123712682;123718701;123718701;123718701;123722448;123722448;123722448;123724791;123724791;123724791;123724791;123726285;123726285;123726285;123726285;123727909;123727909;123727909;123727909;123734008;123734008;123734008;123734008;123734008;123735624;123735624;123735624;123735624;123735624;123737271;123737502;123737271;123737502;123737271;123737687;123739013;123743935;123743935…	+;+;+;+;+;+;+;+;+;+;+;+;+;+;+;+;+;+;+;+;+;+;+;+;+;+;+;+;+;+;+;+;+;+;+;+;+;+;+;+;+;+;+;+;+;+;+;+;+;+;+;+;+;+;+;+;+;+;+;+;+;+;+;+;+;+;+;+;+;+;+	13729	2.60988	2.79876	3.8679	3.97193	1.28851e-10	5.1493e-09	-0.51748
C10orf54	10;10;10;10;10;10;10;10;10;10;10;10;10;10	71747559;71750916;71751668;71751668;71752975;71752975;71755359;71755359;71757578;71760482;71760868;71761598;71761598;71773358	71751290;71751290;71751861;71751861;71753002;71753002;71755466;71755466;71757630;71760924;71760924;71761944;71762026;71773498	-;-;-;-;-;-;-;-;-;-;-;-;-;-	5128	7.95385	9.06585	5.54816	5.87614	1.30972e-10	5.21394e-09	0.59317
ARHGAP45	19;19;19;19;19;19;19;19;19;19;19;19;19;19;19;19;19;19;19;19;19;19;19;19;19;19;19;19;19;19;19;19;19;19;19;19;19;19;19;19;19;19;19;19;19;19;19;19;19;19;19;19;19;19;19;19;19;19;19;19;19;19;19;19;19;19;19;19;19;19;19;19;19;19;19;19;19;19;19;19;19;19;19;19;19;19;19;19;19;19;19;19;19;19;19;19;19;19;19;19;19;19;19;19;19;19;19;19;19;19;19;19;19;19;19;19;19;19;19;19;19;19;19;19;19;19;19;19;19;19;19;19;19;…	1065923;1066509;1067166;1067317;1067319;1067327;1067498;1068333;1068414;1068414;1068414;1068414;1071221;1071513;1073149;1073149;1073149;1073149;1073149;1073149;1073149;1073149;1073506;1073506;1073506;1073506;1073506;1073506;1073506;1073583;1073674;1073674;1073674;1073674;1073674;1073674;1073948;1073948;1073948;1073948;1073948;1073948;1073948;1074104;1074104;1074104;1074104;1074104;1074104;1074104…	1066163;1066641;1067495;1067495;1067495;1067495;1067674;1068744;1068744;1068744;1068744;1068744;1071358;1071766;1073292;1073292;1073292;1073292;1073292;1073223;1073292;1073292;1073549;1073590;1073590;1073590;1073590;1073590;1073590;1073746;1073746;1073746;1073746;1073746;1073746;1073746;1074014;1074014;1074014;1074014;1074014;1074014;1074014;1074241;1074241;1074241;1074241;1074241;1074241;1074241…	+;+;+;+;+;+;+;+;+;+;+;+;+;+;+;+;+;+;+;+;+;+;+;+;+;+;+;+;+;+;+;+;+;+;+;+;+;+;+;+;+;+;+;+;+;+;+;+;+;+;+;+;+;+;+;+;+;+;+;+;+;+;+;+;+;+;+;+;+;+;+;+;+;+;+;+;+;+;+;+;+;+;+;+;+;+;+;+;+;+;+;+;+;+;+;+;+;+;+;+;+;+;+;+;+;+;+;+;+;+;+;+;+;+;+;+;+;+;+;+;+;+;+;+;+;+;+;+	6238	62.8049	62.9553	51.8812	52.548	1.31155e-10	5.21394e-09	0.286132
COL23A1	5;5;5;5;5;5;5;5;5;5;5;5;5;5;5;5;5;5;5;5;5;5;5;5;5;5;5;5;5;5;5;5;5;5;5;5;5;5;5;5;5;5;5;5;5;5;5;5;5;5;5;5;5;5;5;5;5;5	178237618;178237620;178239141;178239141;178242042;178242042;178242341;178242341;178245942;178245942;178246254;178246254;178246391;178246391;178247526;178247526;178247775;178247775;178248192;178248192;178249117;178249117;178250061;178250061;178252544;178252544;178254949;178254949;178256353;178256353;178256866;178256866;178257523;178257523;178259721;178259721;178261722;178261722;178262217;178262217…	178238700;178238700;178239179;178239179;178242128;178242128;178242394;178242394;178245968;178245968;178246307;178246307;178246453;178246453;178247552;178247552;178247831;178247831;178248254;178248254;178249206;178249206;178250105;178250105;178252597;178252597;178255026;178255026;178256397;178256397;178256928;178256928;178257567;178257567;178259747;178259747;178261748;178261748;178262252;178262252…	-;-;-;-;-;-;-;-;-;-;-;-;-;-;-;-;-;-;-;-;-;-;-;-;-;-;-;-;-;-;-;-;-;-;-;-;-;-;-;-;-;-;-;-;-;-;-;-;-;-;-;-;-;-;-;-;-;-	3586	64.1486	66.1478	55.8021	51.6759	1.32246e-10	5.24358e-09	0.295389
RNF213	17;17;17;17;17;17;17;17;17;17;17;17;17;17;17;17;17;17;17;17;17;17;17;17;17;17;17;17;17;17;17;17;17;17;17;17;17;17;17;17;17;17;17;17;17;17;17;17;17;17;17;17;17;17;17;17;17;17;17;17;17;17;17;17;17;17;17;17;17;17;17;17;17;17;17;17;17;17;17;17;17;17;17;17;17;17;17;17;17;17;17;17;17;17;17;17;17;17;17;17;17;17;17;17;17;17;17;17;17;17;17;17;17;17;17;17;17;17;17;17;17;17;17;17;17;17;17;17;17;17;17;17;17;…	80260866;80260868;80260870;80263574;80263574;80263574;80273241;80273241;80273241;80278764;80287815;80287815;80287815;80287959;80288633;80288633;80288633;80288633;80289659;80289659;80289659;80289659;80289761;80290570;80290570;80290570;80290570;80290570;80291628;80291628;80291628;80291628;80291628;80294720;80294720;80294720;80294720;80295557;80295557;80295557;80295557;80295729;80298321;80298321;802…	80260902;80260902;80260902;80263778;80263778;80263778;80273404;80273404;80273404;80278910;80288363;80288363;80288363;80288363;80288755;80288755;80288755;80288755;80289837;80289837;80289837;80289837;80289837;80290728;80290728;80290728;80290728;80290728;80292007;80291827;80291827;80291827;80291827;80295003;80295003;80295003;80295003;80295813;80295813;80295813;80295813;80295813;80298775;80298518;802…	+;+;+;+;+;+;+;+;+;+;+;+;+;+;+;+;+;+;+;+;+;+;+;+;+;+;+;+;+;+;+;+;+;+;+;+;+;+;+;+;+;+;+;+;+;+;+;+;+;+;+;+;+;+;+;+;+;+;+;+;+;+;+;+;+;+;+;+;+;+;+;+;+;+;+;+;+;+;+;+;+;+;+;+;+;+;+;+;+;+;+;+;+;+;+;+;+;+;+;+;+;+;+;+;+;+;+;+;+;+;+;+;+;+;+;+;+;+;+;+;+;+;+;+;+;+;+;+	28570	3.95662	4.3789	3.26614	3.25789	1.37384e-10	5.43311e-09	0.371233
SSBP4	19;19;19;19;19;19;19;19;19;19;19;19;19;19;19;19;19;19;19;19;19;19;19;19;19;19;19;19;19;19;19;19;19;19;19;19;19;19;19;19;19;19;19;19;19;19;19;19;19;19;19;19;19;19;19;19;19;19;19;19;19;19;19;19;19;19;19;19;19;19;19;19;19;19;19;19;19;19;19;19;19;19;19;19;19;19;19;19;19;19;19;19;19;19;19;19;19;19;19;19;19;19;19;19;19;19;19;19;19;19;19;19;19;19;19;19;19;19;19;19;19;19;19;19;19;19	18418864;18419336;18419355;18419426;18419430;18419606;18419624;18419649;18420103;18425909;18425909;18426040;18427351;18427351;18427351;18427351;18427351;18427351;18427351;18427351;18427351;18427752;18427752;18427752;18427752;18427752;18427752;18427752;18427752;18427898;18427898;18427898;18427898;18427898;18427898;18427898;18427898;18427898;18430841;18430841;18430841;18430841;18430841;18430841;184…	18419149;18419707;18419707;18419615;18419707;18419707;18419707;18419707;18420124;18426011;18426083;18426083;18427423;18427423;18427423;18427423;18427423;18427423;18427423;18427423;18427423;18427813;18427813;18427813;18427813;18427813;18427813;18427813;18427813;18427982;18427982;18427982;18427982;18427982;18427982;18427982;18427982;18427982;18430930;18430930;18430930;18430930;18430930;18430930;184…	+;+;+;+;+;+;+;+;+;+;+;+;+;+;+;+;+;+;+;+;+;+;+;+;+;+;+;+;+;+;+;+;+;+;+;+;+;+;+;+;+;+;+;+;+;+;+;+;+;+;+;+;+;+;+;+;+;+;+;+;+;+;+;+;+;+;+;+;+;+;+;+;+;+;+;+;+;+;+;+;+;+;+;+;+;+;+;+;+;+;+;+;+;+;+;+;+;+;+;+;+;+;+;+;+;+;+;+;+;+;+;+;+;+;+;+;+;+;+;+;+;+;+;+;+;+	2974	17.323	18.2069	25.8251	23.5836	1.44974e-10	5.71839e-09	-0.458245
GDI2	10;10;10;10;10;10;10;10;10;10;10;10;10;10;10;10;10;10;10;10;10;10;10;10;10;10;10;10;10;10;10;10;10;10;10;10;10;10;10;10;10;10;10;10;10;10;10;10;10;10;10;10;10;10;10;10;10;10	5765223;5765229;5765849;5765954;5766241;5766241;5766241;5766241;5766494;5766494;5768213;5768213;5768213;5768213;5773842;5773842;5773842;5773842;5785142;5785142;5785142;5785142;5785852;5785852;5785852;5785852;5785866;5785982;5786006;5794885;5794885;5794885;5794885;5794885;5794908;5796763;5796763;5796763;5796763;5796763;5796763;5796763;5800598;5800598;5800598;5800598;5800598;5800598;5811874;5811874…	5766152;5766152;5766152;5766152;5766638;5766295;5766295;5766295;5766638;5766638;5768384;5769389;5768384;5768384;5773941;5773941;5773941;5773941;5785273;5785273;5785273;5785273;5786050;5786050;5785922;5786050;5786050;5786050;5786050;5795019;5795019;5794989;5795019;5795019;5795019;5796862;5796862;5796862;5796862;5796862;5796862;5796862;5800705;5800705;5800705;5800705;5800705;5800705;5811956;5811956…	-;-;-;-;-;-;-;-;-;-;-;-;-;-;-;-;-;-;-;-;-;-;-;-;-;-;-;-;-;-;-;-;-;-;-;-;-;-;-;-;-;-;-;-;-;-;-;-;-;-;-;-;-;-;-;-;-;-	4033	104.494	103.094	85.361	87.1644	1.51109e-10	5.94492e-09	0.284957
CHST11	12;12;12;12;12;12;12;12;12;12;12;12;12;12;12	104455295;104456916;104456968;104456971;104456973;104457001;104588848;104601906;104601906;104601906;104601906;104601906;104756949;104756949;104756949	104455636;104456996;104457529;104457514;104457529;104457514;104588943;104602147;104601991;104601991;104602279;104601991;104757339;104762014;104762014	+;+;+;+;+;+;+;+;+;+;+;+;+;+;+	6492	35.4549	34.8771	29.437	28.9788	1.51655e-10	5.95099e-09	0.285769
DDX18	2;2;2;2;2;2;2;2;2;2;2;2;2;2;2;2;2;2;2;2;2;2;2;2;2;2;2;2;2;2;2;2;2;2;2;2;2;2	117814650;117815058;117815688;117817444;117817444;117819649;117819649;117821161;117821161;117821650;117821650;117821862;117821862;117821976;117822147;117822147;117822147;117822147;117824337;117824569;117824569;117824569;117824940;117824940;117824997;117824997;117825447;117825447;117825447;117825447;117826269;117826269;117826269;117828949;117828949;117829289;117830582;117830582	117814862;117815092;117815723;117817728;117817728;117819792;117819792;117821296;117821296;117821750;117821750;117822061;117822061;117822061;117822261;117822780;117822261;117822261;117824708;117824599;117824708;117824708;117825101;117825101;117825101;117825101;117825599;117825599;117825983;117825599;117829466;117826382;117826382;117828965;117829005;117829466;117832370;117832379	+;+;+;+;+;+;+;+;+;+;+;+;+;+;+;+;+;+;+;+;+;+;+;+;+;+;+;+;+;+;+;+;+;+;+;+;+;+	7851	14.4098	14.9365	18.4708	18.6276	1.62089e-10	6.34404e-09	-0.320238
RAPGEF2	4;4;4;4;4;4;4;4;4;4;4;4;4;4;4;4;4;4;4;4;4;4;4;4;4;4;4;4;4;4;4;4;4;4;4;4;4;4;4;4;4;4;4;4;4;4;4;4;4;4;4;4;4;4;4;4;4;4;4;4;4;4;4;4;4;4;4;4;4;4;4;4;4;4;4;4;4	159104178;159186642;159193200;159210500;159228254;159229337;159238809;159238809;159238809;159241201;159241201;159241201;159243774;159243774;159266881;159267161;159267737;159282504;159304342;159304342;159304342;159304342;159304342;159304342;159314591;159314591;159314591;159314591;159314591;159314591;159322347;159322347;159322347;159322347;159322347;159323459;159323459;159323459;159326661;159329858…	159104231;159186712;159193256;159210583;159228357;159229530;159238884;159238884;159238884;159241363;159241368;159241368;159243791;159243791;159266958;159267309;159268215;159282640;159304473;159304473;159304473;159304473;159304473;159304473;159314768;159314768;159314768;159314768;159314768;159314768;159322483;159322449;159322483;159322363;159322483;159323470;159323617;159323515;159330010;159330010…	+;+;+;+;+;+;+;+;+;+;+;+;+;+;+;+;+;+;+;+;+;+;+;+;+;+;+;+;+;+;+;+;+;+;+;+;+;+;+;+;+;+;+;+;+;+;+;+;+;+;+;+;+;+;+;+;+;+;+;+;+;+;+;+;+;+;+;+;+;+;+;+;+;+;+;+;+	12005	3.20815	3.40827	2.2908	2.16935	1.63886e-10	6.39788e-09	0.586331
ZFP36L2	2;2	43222402;43226265	43225752;43226609	-;-	3696	44.3759	46.8318	55.0103	58.7741	1.64508e-10	6.40568e-09	-0.301021
RSRC1	3;3;3;3;3;3;3;3;3;3;3;3;3;3;3;3;3;3;3;3;3;3;3;3;3;3;3;3;3;3;3;3;3;3;3;3;3;3;3;3;3;3;3;3;3;3;3;3;3;3;3;3;3;3;3;3;3;3;3;3;3;3;3;3;3;3;3;3;3;3;3;3;3;3;3;3;3;3;3;3;3;3;3;3;3;3;3;3;3;3;3;3;3;3;3;3;3;3;3;3;3;3;3;3;3;3;3;3;3;3;3	158105855;158107789;158110052;158110052;158110068;158110089;158110106;158110107;158110129;158110149;158110156;158110402;158122103;158122103;158122103;158122103;158122103;158122103;158122103;158122103;158122103;158122103;158122103;158122103;158122154;158123866;158123866;158123866;158123866;158123866;158123866;158123866;158123866;158123866;158123866;158123866;158123866;158123866;158132086;158136745…	158106010;158107971;158110211;158110223;158110223;158110211;158110197;158110197;158110211;158110223;158110211;158110604;158122298;158122298;158122298;158122298;158122298;158122298;158122298;158122298;158122298;158122298;158122298;158122298;158122298;158123991;158123991;158123991;158123991;158123991;158123991;158123991;158123991;158123991;158123991;158123991;158123991;158123991;158132263;158136898…	+;+;+;+;+;+;+;+;+;+;+;+;+;+;+;+;+;+;+;+;+;+;+;+;+;+;+;+;+;+;+;+;+;+;+;+;+;+;+;+;+;+;+;+;+;+;+;+;+;+;+;+;+;+;+;+;+;+;+;+;+;+;+;+;+;+;+;+;+;+;+;+;+;+;+;+;+;+;+;+;+;+;+;+;+;+;+;+;+;+;+;+;+;+;+;+;+;+;+;+;+;+;+;+;+;+;+;+;+;+;+	5117	19.8874	19.4812	24.9541	25.3741	1.75746e-10	6.82577e-09	-0.336237
MLX	17;17;17;17;17;17;17;17;17;17;17;17;17;17;17;17;17;17;17;17;17;17;17;17;17;17;17;17;17;17;17;17;17;17;17;17;17;17;17;17;17;17;17;17;17;17;17;17;17;17;17;17;17;17;17;17;17;17	42567068;42567072;42567072;42567072;42567074;42567099;42567102;42567103;42567117;42567281;42567619;42567619;42567619;42567619;42567619;42567619;42567619;42567619;42567619;42567619;42568077;42568470;42568470;42568470;42568470;42568470;42568837;42568837;42568837;42568837;42568837;42568837;42569204;42569204;42569204;42569204;42569204;42569204;42569204;42569204;42569507;42569507;42569507;42569507;425…	42567166;42567166;42567166;42567328;42567328;42567166;42567166;42567166;42567160;42567328;42567655;42567655;42567655;42567655;42568104;42567655;42567655;42567655;42567655;42567655;42568943;42568898;42568943;42568943;42568559;42568559;42568943;42568943;42568943;42568943;42568943;42568943;42569303;42569499;42569290;42569303;42569606;42569303;42569303;42569303;42569606;42570183;42569606;42569606;425…	+;+;+;+;+;+;+;+;+;+;+;+;+;+;+;+;+;+;+;+;+;+;+;+;+;+;+;+;+;+;+;+;+;+;+;+;+;+;+;+;+;+;+;+;+;+;+;+;+;+;+;+;+;+;+;+;+;+	4259	30.4491	29.502	24.2569	23.7639	1.84355e-10	7.14189e-09	0.338042
SLBP	4;4;4;4;4;4;4;4;4;4;4;4;4;4;4;4;4;4;4;4;4;4;4;4;4;4;4;4;4;4;4;4;4;4;4;4;4;4;4;4;4;4	1692800;1692800;1692858;1693244;1693447;1694774;1694774;1694774;1694774;1694774;1696202;1696202;1696202;1696202;1696202;1696295;1699564;1699564;1699564;1699564;1699564;1699564;1700011;1700011;1700011;1700011;1700011;1700011;1703596;1703596;1703596;1703596;1711874;1711874;1711874;1711874;1711874;1712130;1712130;1712130;1712130;1712201	1693713;1693713;1693713;1693713;1693713;1694840;1694840;1694840;1694840;1694840;1696351;1696351;1696351;1696351;1696351;1696351;1699701;1699701;1699701;1699701;1699701;1699701;1700070;1700070;1700091;1700070;1700070;1700070;1703700;1703700;1703700;1703700;1711927;1712018;1711990;1711990;1711990;1712317;1712250;1712318;1712555;1712344	-;-;-;-;-;-;-;-;-;-;-;-;-;-;-;-;-;-;-;-;-;-;-;-;-;-;-;-;-;-;-;-;-;-;-;-;-;-;-;-;-;-	2026	29.289	29.2758	40.6106	38.5865	1.85694e-10	7.17408e-09	-0.417662
GRIPAP1	X;X;X;X;X;X;X;X;X;X;X;X;X;X;X;X;X;X;X;X;X;X;X;X;X;X;X;X;X;X;X;X;X;X;X;X;X;X;X;X;X;X;X;X;X;X;X;X;X;X;X;X;X;X;X;X;X;X;X;X;X;X;X;X;X;X;X;X;X;X;X;X;X;X;X;X;X;X;X;X;X;X;X;X;X;X;X;X;X;X;X;X;X;X;X;X;X;X;X;X;X;X;X;X;X;X;X;X;X;X;X;X;X;X;X;X;X;X;X;X;X;X;X;X;X;X;X;X;X;X;X;X;X;X;X;X;X;X;X;X;X;X;X;X;X;X;X;X;X;X;X;X;X;X;X;X;X;X;X;X;X;X;X;X;X;X;X;X	48973720;48973723;48973723;48973723;48975155;48975155;48975155;48975155;48976018;48976018;48976018;48976241;48976241;48976241;48976256;48976907;48976907;48977834;48978305;48978305;48978305;48978305;48978305;48980758;48981215;48981215;48981215;48981215;48981215;48981215;48981215;48981416;48981416;48981416;48981416;48981416;48981416;48981416;48981596;48981596;48981596;48981596;48981596;48981596;489…	48974285;48974285;48974285;48974285;48975309;48975309;48975309;48976363;48976111;48976111;48976111;48976363;48976363;48976363;48976363;48978435;48978435;48978435;48978435;48978435;48978435;48978435;48978435;48980808;48981314;48981314;48981314;48981314;48981314;48981314;48981314;48981472;48981472;48981472;48981472;48981472;48981472;48981472;48981691;48981691;48981691;48981691;48981691;48981691;489…	-;-;-;-;-;-;-;-;-;-;-;-;-;-;-;-;-;-;-;-;-;-;-;-;-;-;-;-;-;-;-;-;-;-;-;-;-;-;-;-;-;-;-;-;-;-;-;-;-;-;-;-;-;-;-;-;-;-;-;-;-;-;-;-;-;-;-;-;-;-;-;-;-;-;-;-;-;-;-;-;-;-;-;-;-;-;-;-;-;-;-;-;-;-;-;-;-;-;-;-;-;-;-;-;-;-;-;-;-;-;-;-;-;-;-;-;-;-;-;-;-;-;-;-;-;-;-;-	6841	53.3673	53.9089	44.3196	44.9133	1.86131e-10	7.17408e-09	0.283646
TIMELESS	12;12;12;12;12;12;12;12;12;12;12;12;12;12;12;12;12;12;12;12;12;12;12;12;12;12;12;12;12;12;12;12;12;12;12;12;12;12;12;12;12;12;12;12;12;12;12;12;12;12;12;12;12;12;12;12;12;12;12;12;12;12;12;12;12;12;12;12;12;12;12;12;12;12;12;12	56416373;56417119;56417127;56417907;56417907;56417907;56418134;56418134;56418134;56418290;56420569;56420569;56420569;56420569;56420813;56420813;56420813;56420963;56420963;56420963;56420963;56421351;56421351;56421552;56421727;56421727;56421899;56421899;56421899;56422106;56422106;56422106;56422106;56422847;56422847;56422847;56423274;56423274;56423274;56423584;56423584;56423625;56423797;56423797;564…	56417786;56417786;56417786;56418008;56418008;56418008;56418359;56418359;56418359;56418359;56420881;56420687;56420687;56420687;56420881;56420881;56420881;56421090;56421809;56421134;56421134;56421493;56421493;56422016;56421809;56421809;56422016;56422016;56422016;56422221;56422191;56422191;56422191;56422992;56422992;56422992;56423475;56423475;56423475;56423707;56423707;56423707;56423894;56423894;564…	-;-;-;-;-;-;-;-;-;-;-;-;-;-;-;-;-;-;-;-;-;-;-;-;-;-;-;-;-;-;-;-;-;-;-;-;-;-;-;-;-;-;-;-;-;-;-;-;-;-;-;-;-;-;-;-;-;-;-;-;-;-;-;-;-;-;-;-;-;-;-;-;-;-;-;-	5818	33.3646	31.7757	41.3681	39.3089	1.92661e-10	7.40696e-09	-0.290662
TMEM259	19;19;19;19;19;19;19;19;19;19;19;19;19;19;19;19;19;19;19;19;19;19;19;19;19;19;19;19;19;19;19;19;19;19;19;19;19;19;19;19;19;19;19;19;19;19;19;19;19;19;19;19;19;19;19;19;19;19;19;19;19;19;19;19;19;19;19;19;19;19;19;19;19;19;19;19;19	1009648;1009648;1009650;1009651;1009652;1009653;1009720;1010177;1010695;1010991;1010991;1011096;1011096;1011096;1011096;1011367;1011367;1011367;1011367;1011367;1011367;1011580;1011580;1011580;1011580;1011580;1011580;1011741;1011741;1011741;1011741;1011741;1011741;1011852;1011866;1011892;1011892;1011892;1011892;1011892;1011892;1011892;1012066;1012066;1012066;1012066;1012066;1012066;1012066;1012066…	1010895;1010895;1010895;1010895;1009861;1010895;1011356;1010895;1010895;1011095;1011095;1011195;1011499;1011195;1011195;1011499;1011499;1011499;1011612;1011499;1011499;1011612;1011663;1011798;1011663;1011663;1011663;1011798;1011798;1011798;1011798;1011798;1011798;1011992;1011992;1011992;1011992;1011992;1011992;1011992;1011992;1011992;1012188;1012573;1012573;1012289;1012188;1012188;1012188;1012188…	-;-;-;-;-;-;-;-;-;-;-;-;-;-;-;-;-;-;-;-;-;-;-;-;-;-;-;-;-;-;-;-;-;-;-;-;-;-;-;-;-;-;-;-;-;-;-;-;-;-;-;-;-;-;-;-;-;-;-;-;-;-;-;-;-;-;-;-;-;-;-;-;-;-;-;-;-	4031	30.0394	29.8218	44.1548	39.044	2.01029e-10	7.70914e-09	-0.457372
EBPL	13;13;13;13;13;13;13;13;13;13;13;13;13;13;13;13;13;13;13;13;13;13;13;13;13	49660723;49660723;49660723;49660723;49660726;49660834;49661866;49663057;49663057;49663057;49663057;49668170;49669777;49669777;49669777;49669777;49669777;49686475;49691254;49691254;49691254;49691254;49691254;49691254;49691254	49661208;49661208;49661208;49661208;49661208;49661208;49661927;49663195;49663195;49663195;49663195;49668569;49669846;49669846;49669846;49669846;49669846;49686595;49691457;49691463;49691475;49691463;49691463;49691463;49691438	-;-;-;-;-;-;-;-;-;-;-;-;-;-;-;-;-;-;-;-;-;-;-;-;-	1500	1.45507	1.93329	4.91521	4.95163	2.06746e-10	7.90843e-09	-1.52182
SMC4	3;3;3;3;3;3;3;3;3;3;3;3;3;3;3;3;3;3;3;3;3;3;3;3;3;3;3;3;3;3;3;3;3;3;3;3;3;3;3;3;3;3;3;3;3;3;3;3;3;3;3;3;3;3;3;3;3;3;3;3;3;3;3;3;3;3;3;3;3;3;3;3;3;3;3;3;3;3;3;3;3;3;3;3;3;3;3;3;3;3;3;3;3;3;3;3;3;3;3;3;3;3;3;3;3;3;3;3;3;3;3;3;3;3;3;3;3;3;3;3;3;3;3;3;3;3;3;3;3;3;3;3;3;3;3;3;3;3;3;3;3;3;3;3;3;3;3;3;3;3;3;3;3;3;3;3;3;3;3;3;3;3;3;3;3;3;3;3;3;3;3;3;3;3;3;3;3;3;3;3;3;3;3;3;3;3;3;3;3;3;3;3;3;3;3;3;3;3;3;3…	160399274;160399304;160399638;160399639;160399643;160399643;160399645;160399650;160399650;160399650;160399651;160399666;160399668;160399669;160399669;160400482;160400600;160400628;160400628;160400822;160400822;160400822;160400822;160400822;160400822;160401915;160401915;160401915;160401915;160401915;160401915;160401915;160401915;160401915;160401915;160401915;160401990;160401990;160402676;160402676…	160399352;160399749;160399749;160399697;160399697;160399749;160399749;160399749;160399749;160399697;160399749;160399749;160400965;160399749;160399749;160400965;160400965;160400965;160400965;160400965;160400965;160400965;160400965;160400965;160400965;160402093;160402093;160402093;160402093;160402093;160401923;160402093;160402093;160402093;160402093;160402093;160402093;160402093;160402867;160402867…	+;+;+;+;+;+;+;+;+;+;+;+;+;+;+;+;+;+;+;+;+;+;+;+;+;+;+;+;+;+;+;+;+;+;+;+;+;+;+;+;+;+;+;+;+;+;+;+;+;+;+;+;+;+;+;+;+;+;+;+;+;+;+;+;+;+;+;+;+;+;+;+;+;+;+;+;+;+;+;+;+;+;+;+;+;+;+;+;+;+;+;+;+;+;+;+;+;+;+;+;+;+;+;+;+;+;+;+;+;+;+;+;+;+;+;+;+;+;+;+;+;+;+;+;+;+;+;+	8457	104.889	106.986	126.663	132.99	2.19243e-10	8.36538e-09	-0.275434
FCGR2C	1;1;1;1;1;1;1;1;1;1;1;1;1;1;1;1;1;1;1;1;1;1;1;1;1;1;1;1;1;1;1;1;1;1;1;1;1;1;1;1;1;1;1;1;1;1;1;1;1;1;1;1;1;1;1;1;1;1;1;1;1;1;1	161581339;161581339;161581339;161581340;161581346;161581361;161581436;161583090;161583090;161583212;161583721;161583721;161583721;161588422;161588422;161588422;161588422;161588422;161588422;161588422;161588422;161588422;161589562;161589562;161589562;161589562;161589562;161589562;161589562;161589565;161589565;161589600;161589600;161590081;161591144;161591144;161591144;161591144;161591144;161591144…	161581549;161581549;161581549;161581549;161581549;161581549;161581549;161583193;161583193;161583251;161583814;161583814;161583814;161588442;161588442;161588442;161588442;161588442;161588442;161588442;161588442;161588442;161589819;161589596;161589819;161589819;161589819;161589596;161589697;161589819;161589886;161589819;161589819;161590218;161591300;161591297;161591398;161591398;161591291;161591398…	+;+;+;+;+;+;+;+;+;+;+;+;+;+;+;+;+;+;+;+;+;+;+;+;+;+;+;+;+;+;+;+;+;+;+;+;+;+;+;+;+;+;+;+;+;+;+;+;+;+;+;+;+;+;+;+;+;+;+;+;+;+;+	3580	9.81814	9.51796	6.07726	6.67057	2.2278e-10	8.47904e-09	0.619644
RAB11FIP3	16;16;16;16;16;16;16;16;16;16;16;16;16;16;16;16;16;16;16;16;16;16;16;16;16;16;16;16;16;16;16;16;16;16;16;16;16;16;16;16;16;16;16;16;16;16;16;16;16;16;16;16;16;16;16;16;16;16;16;16;16;16;16;16;16;16;16;16;16;16;16;16	425619;426379;461404;461404;471295;471295;474850;474869;474924;474924;482525;482525;482525;482525;482525;482525;482657;488851;488851;488851;488851;488851;488851;488851;488942;491134;491134;491134;496824;496824;496824;496824;496824;496824;496824;497292;502750;503004;503004;503004;503004;503004;505524;505524;505524;505524;505524;510453;510563;510660;510660;510660;510660;518943;518943;518943;518943;…	426720;426720;461497;461497;471389;471389;475045;475098;475045;475045;482736;482736;482736;482736;482736;482736;482736;489000;489000;489101;489000;489000;489000;489000;489000;491268;491268;491268;496859;497158;496859;496859;496859;496859;496859;497448;503097;503063;503097;503097;503097;503097;505627;505605;505627;505627;505627;510800;510800;510800;510800;510800;510800;519024;519108;519018;519024;…	+;+;+;+;+;+;+;+;+;+;+;+;+;+;+;+;+;+;+;+;+;+;+;+;+;+;+;+;+;+;+;+;+;+;+;+;+;+;+;+;+;+;+;+;+;+;+;+;+;+;+;+;+;+;+;+;+;+;+;+;+;+;+;+;+;+;+;+;+;+;+;+	6317	12.568	13.3417	17.4641	16.4908	2.23436e-10	8.48275e-09	-0.372494
PRR11	17;17;17;17;17;17;17;17;17;17;17;17;17;17;17;17;17;17;17;17;17;17;17;17;17;17;17;17;17;17;17;17;17;17;17;17;17;17;17;17;17;17;17;17;17;17;17;17;17;17;17;17;17;17;17;17;17;17;17;17;17;17;17	59155499;59155732;59155745;59155746;59155746;59155753;59155757;59155757;59160759;59160759;59163599;59163599;59169748;59169748;59169748;59169748;59169748;59169748;59169748;59169748;59185054;59185054;59185054;59185054;59185054;59185054;59185054;59185440;59185440;59185440;59185440;59185440;59185440;59193492;59193492;59193492;59193492;59193492;59194757;59194757;59194757;59194757;59195331;59195331;591…	59155805;59155805;59155805;59155805;59155805;59155805;59155805;59155805;59160876;59160876;59163664;59163664;59169880;59169880;59169880;59169880;59169819;59169880;59169880;59169880;59185204;59185204;59185562;59185204;59185204;59185204;59185204;59185562;59185562;59185513;59185562;59185562;59185562;59193734;59193734;59193734;59193686;59193734;59194855;59194855;59194855;59194855;59195443;59195443;591…	+;+;+;+;+;+;+;+;+;+;+;+;+;+;+;+;+;+;+;+;+;+;+;+;+;+;+;+;+;+;+;+;+;+;+;+;+;+;+;+;+;+;+;+;+;+;+;+;+;+;+;+;+;+;+;+;+;+;+;+;+;+;+	4080	6.22995	6.45245	9.42334	9.77052	2.25284e-10	8.53158e-09	-0.579578
RAB11FIP1	8;8;8;8;8;8;8;8;8;8;8;8;8;8;8;8;8;8;8;8;8;8;8;8	37858618;37858949;37862759;37862895;37862895;37870387;37870420;37870420;37870420;37870420;37870420;37871278;37871278;37874515;37874515;37874515;37874515;37877109;37877109;37877109;37877109;37899071;37899071;37899304	37863113;37863113;37863113;37863113;37863113;37870528;37873278;37870528;37870528;37870528;37870528;37873278;37873179;37875322;37875322;37875322;37875322;37878117;37877551;37877551;37877551;37899454;37899467;37899454	-;-;-;-;-;-;-;-;-;-;-;-;-;-;-;-;-;-;-;-;-;-;-;-	9602	10.0015	9.78715	7.40049	7.91155	2.27504e-10	8.59422e-09	0.388344
YWHAH	22;22;22;22;22;22;22;22;22;22;22;22;22;22;22	31944461;31944522;31944522;31944747;31944966;31945500;31945557;31947422;31950308;31956139;31956139;31956139;31956139;31956139;31956139	31944820;31944820;31944820;31944820;31945235;31945678;31945678;31947485;31950422;31957603;31956576;31956604;31957603;31956482;31957603	+;+;+;+;+;+;+;+;+;+;+;+;+;+;+	2453	22.6705	22.2402	36.1045	30.9114	2.33819e-10	8.79832e-09	-0.560131
LGALS9	17;17;17;17;17;17;17;17;17;17;17;17;17;17;17;17;17;17;17;17;17;17;17;17;17;17;17;17;17;17;17;17;17;17;17;17;17;17;17;17;17;17;17;17;17;17;17;17;17;17;17;17;17;17;17;17;17;17;17;17;17;17;17;17;17;17;17;17;17;17;17;17;17;17;17;17;17;17;17;17;17;17;17;17;17;17;17;17;17;17;17;17;17;17;17;17;17;17;17;17;17;17	27629798;27629798;27631148;27631167;27631188;27631193;27631195;27631209;27631211;27631214;27631226;27638263;27638263;27638263;27638263;27638263;27638263;27638263;27638263;27638263;27638263;27640387;27640572;27640572;27640572;27640572;27640572;27640572;27640572;27640572;27640643;27640643;27640734;27640965;27642238;27642238;27642238;27642238;27642238;27642238;27642238;27642238;27642238;27642238;276…	27631304;27631304;27631304;27631304;27631304;27631304;27631304;27631304;27631304;27631304;27631304;27638354;27638724;27638354;27638354;27638354;27638354;27638354;27638354;27638354;27638354;27640773;27640773;27640773;27640773;27640773;27640773;27640773;27640773;27640773;27640773;27640773;27640773;27641023;27642348;27642348;27642348;27642348;27642348;27642348;27642423;27642348;27642348;27642348;276…	+;+;+;+;+;+;+;+;+;+;+;+;+;+;+;+;+;+;+;+;+;+;+;+;+;+;+;+;+;+;+;+;+;+;+;+;+;+;+;+;+;+;+;+;+;+;+;+;+;+;+;+;+;+;+;+;+;+;+;+;+;+;+;+;+;+;+;+;+;+;+;+;+;+;+;+;+;+;+;+;+;+;+;+;+;+;+;+;+;+;+;+;+;+;+;+;+;+;+;+;+;+	5714	15.4142	15.6061	11.9136	12.1184	2.34066e-10	8.79832e-09	0.386265
USP20	9;9;9;9;9;9;9;9;9;9;9;9;9;9;9;9;9;9;9;9;9;9;9;9;9;9;9;9;9;9;9;9;9;9;9;9;9;9;9;9;9;9;9;9;9;9;9;9;9;9;9;9;9;9;9;9;9;9;9;9;9;9;9;9;9;9;9;9;9;9;9;9;9;9;9;9;9;9;9;9;9;9;9;9;9;9;9;9;9;9;9;9;9;9;9;9;9;9;9;9;9;9;9;9;9;9;9	129834698;129835417;129835446;129835470;129835478;129849800;129849813;129849813;129849813;129849813;129852540;129852540;129852540;129852540;129852540;129856307;129856307;129856307;129856307;129858050;129858050;129858050;129858050;129858467;129858467;129858467;129858467;129860937;129860937;129860937;129861543;129861543;129861543;129863186;129863186;129863186;129865303;129865303;129865303;129868005…	129835078;129835499;129835499;129835499;129835597;129849924;129849924;129849924;129849924;129849924;129852636;129852636;129852636;129852636;129852636;129856360;129856360;129856360;129856360;129858112;129858112;129858112;129858112;129858598;129858598;129858547;129858598;129861033;129861033;129861033;129861612;129861612;129861612;129863299;129863299;129863299;129865381;129865381;129865381;129868449…	+;+;+;+;+;+;+;+;+;+;+;+;+;+;+;+;+;+;+;+;+;+;+;+;+;+;+;+;+;+;+;+;+;+;+;+;+;+;+;+;+;+;+;+;+;+;+;+;+;+;+;+;+;+;+;+;+;+;+;+;+;+;+;+;+;+;+;+;+;+;+;+;+;+;+;+;+;+;+;+;+;+;+;+;+;+;+;+;+;+;+;+;+;+;+;+;+;+;+;+;+;+;+;+;+;+;+	5521	23.769	25.3354	31.4027	30.2013	2.40234e-10	9.00788e-09	-0.309461
CTD-2231E14.8	19;19;19;19	16123661;16132571;16139735;16139735	16126489;16133510;16139821;16139892	-;-;-;-	3927	25.8791	25.4885	18.8899	20.8411	2.56964e-10	9.61147e-09	0.389084
GAS6-AS1	13;13;13;13;13;13	113815630;113833492;113834578;113838077;113839084;113842490	113815691;113833579;113834764;113838247;113845744;113844306	+;+;+;+;+;+	7169	4.09104	4.21576	2.70673	2.72127	2.64906e-10	9.8842e-09	0.631693
RP11-156E8.1	1	244969350	244971088	-	1739	45.9415	46.432	36.1804	34.304	2.76252e-10	1.02823e-08	0.407782
PLAUR	19;19;19;19;19;19;19;19;19;19;19;19;19;19;19;19;19;19;19;19;19;19;19;19;19;19;19;19;19;19;19;19;19;19;19;19;19;19;19;19;19;19;19;19;19;19;19;19;19;19;19;19;19;19;19;19;19;19;19;19;19;19;19;19;19;19;19;19;19	43646095;43648576;43648579;43648580;43648580;43651824;43652041;43652225;43652225;43652225;43652225;43652225;43652226;43652264;43655439;43655439;43655439;43655439;43655439;43655439;43655439;43655439;43655513;43656479;43656479;43656479;43656479;43656479;43656479;43656479;43656479;43656479;43656479;43656479;43656479;43656566;43660974;43660974;43665110;43665316;43665316;43665316;43665316;43665316;436…	43646548;43648909;43649143;43649143;43649143;43652053;43652371;43652371;43652371;43652371;43652371;43652371;43652371;43652371;43655573;43655573;43655573;43655573;43655573;43655573;43655573;43655573;43655573;43656640;43656640;43656640;43656640;43656802;43656640;43656573;43656640;43656640;43656616;43656640;43656640;43656640;43661548;43661442;43665459;43665459;43665459;43665459;43665459;43665459;436…	-;-;-;-;-;-;-;-;-;-;-;-;-;-;-;-;-;-;-;-;-;-;-;-;-;-;-;-;-;-;-;-;-;-;-;-;-;-;-;-;-;-;-;-;-;-;-;-;-;-;-;-;-;-;-;-;-;-;-;-;-;-;-;-;-;-;-;-;-	4457	44.8077	44.0509	37.9961	35.0485	2.79775e-10	1.03864e-08	0.300434
WNT6	2;2;2;2;2;2	218859821;218859965;218871027;218871485;218871485;218873384	218860117;218860117;218871247;218871739;218871819;218874233	+;+;+;+;+;+	1703	1.81563	1.99552	4.86052	4.99627	2.80417e-10	1.03864e-08	-1.35118
SRGN	10;10;10;10;10	69088106;69088118;69097084;69103871;69103871	69088236;69088236;69097231;69104811;69104541	+;+;+;+;+	1220	590.04	588.865	493.363	492.825	2.86425e-10	1.05831e-08	0.275488
CD300E	17;17;17;17;17;17	74609887;74613925;74617118;74617147;74619097;74623582	74612773;74614033;74617465;74617465;74619347;74623738	-;-;-;-;-;-	3752	0.824098	0.821212	0.108499	0.150349	3.02784e-10	1.11604e-08	2.67586
MICAL2	11;11;11;11;11;11;11;11;11;11;11;11;11;11;11;11;11;11;11;11;11;11;11;11;11;11;11;11;11;11;11;11;11;11;11;11;11;11;11;11;11;11;11;11;11;11;11;11;11;11;11;11;11;11;11;11;11;11;11;11;11;11;11;11;11;11;11;11;11;11;11;11;11;11;11;11;11;11;11;11;11;11;11;11;11;11;11;11;11;11;11;11;11;11;11;11;11;11;11;11;11;11;11;11;11;11;11;11;11;11;11;11;11;11;11;11;11;11;11;11;11;11;11;11;11;11;11;11;11;11;11;11;11;…	12094008;12094017;12094128;12095544;12095984;12109701;12110591;12110605;12116696;12121475;12138388;12138390;12138390;12138390;12138390;12138390;12153224;12161443;12161446;12161868;12162079;12162079;12162079;12162079;12162079;12162079;12162079;12162079;12162079;12162079;12162079;12162079;12162156;12195945;12195945;12197487;12204250;12204250;12204250;12204250;12204250;12204250;12204250;12204250;122…	12094224;12094147;12094224;12095629;12096221;12109773;12110726;12110726;12116916;12121649;12138464;12138464;12138464;12138460;12138460;12138464;12153316;12161576;12161532;12162419;12162419;12162419;12162419;12162419;12162419;12162419;12162419;12162166;12162419;12162420;12162419;12162419;12162419;12196200;12196200;12197811;12204457;12204457;12204347;12204290;12204387;12204457;12204457;12204457;122…	+;+;+;+;+;+;+;+;+;+;+;+;+;+;+;+;+;+;+;+;+;+;+;+;+;+;+;+;+;+;+;+;+;+;+;+;+;+;+;+;+;+;+;+;+;+;+;+;+;+;+;+;+;+;+;+;+;+;+;+;+;+;+;+;+;+;+;+;+;+;+;+;+;+;+;+;+;+;+;+;+;+;+;+;+;+;+;+;+;+;+;+;+;+;+;+;+;+;+;+;+;+;+;+;+;+;+;+;+;+;+;+;+;+;+;+;+;+;+;+;+;+;+;+;+;+;+;+	15809	2.35566	2.51078	1.65947	1.64736	3.1271e-10	1.14983e-08	0.575129
NAB2	12;12;12;12;12;12;12;12;12;12;12;12;12;12;12;12;12;12;12;12	57088894;57089043;57089094;57089147;57091125;57091125;57091231;57091234;57092149;57092448;57092448;57092917;57092917;57092917;57093063;57093063;57093063;57093407;57094612;57094612	57089354;57089354;57089354;57089354;57091998;57091998;57091509;57091816;57092581;57092581;57092581;57092968;57092968;57092968;57093146;57093195;57093195;57093598;57095476;57095475	+;+;+;+;+;+;+;+;+;+;+;+;+;+;+;+;+;+;+;+	3010	8.44458	8.20425	12.5327	12.6503	3.22305e-10	1.18225e-08	-0.578885
ZNFX1-AS1_2	20	49279116	49279208	+	93	1305.45	1325.24	1049.58	1069.08	3.27537e-10	1.19855e-08	0.330299
CCSAP	1;1;1;1;1;1;1;1;1;1;1;1;1;1	229321005;229321011;229321515;229323539;229326738;229326738;229326738;229326738;229340401;229342099;229342099;229342099;229342912;229342912	229325411;229325411;229325411;229325411;229327006;229327558;229327006;229327006;229340633;229342513;229342517;229342513;229343294;229342941	-;-;-;-;-;-;-;-;-;-;-;-;-;-	6263	4.2908	4.36259	6.56489	6.34244	3.39891e-10	1.24076e-08	-0.559021
NUSAP1	15;15;15;15;15;15;15;15;15;15;15;15;15;15;15;15;15;15;15;15;15;15;15;15;15;15;15;15;15;15;15;15;15;15;15;15;15;15;15;15;15;15;15;15;15;15;15;15;15;15;15;15;15;15;15;15;15;15;15;15;15;15;15;15;15;15;15;15;15;15;15;15;15;15;15;15;15;15;15;15;15;15;15;15;15;15;15;15;15;15;15;15;15;15;15;15;15;15;15;15;15;15	41332694;41332694;41332855;41332871;41332871;41332871;41332883;41332886;41332899;41332913;41342386;41342386;41342386;41342386;41342386;41342386;41342386;41342386;41342386;41342396;41345486;41349098;41349098;41349098;41349098;41349098;41349098;41349098;41349098;41349098;41349098;41350988;41350988;41350988;41350988;41350991;41350991;41351033;41351033;41351033;41351102;41351964;41356039;41356039;413…	41333050;41332995;41333050;41333050;41333050;41333050;41333050;41333050;41333050;41333050;41342454;41342454;41342454;41342454;41342454;41342454;41342454;41342454;41342454;41342454;41345602;41349405;41349241;41349241;41349241;41349241;41349241;41349241;41349241;41349241;41349241;41351129;41351129;41351129;41351129;41351129;41351129;41351086;41351129;41351129;41351129;41351986;41356140;41356140;413…	+;+;+;+;+;+;+;+;+;+;+;+;+;+;+;+;+;+;+;+;+;+;+;+;+;+;+;+;+;+;+;+;+;+;+;+;+;+;+;+;+;+;+;+;+;+;+;+;+;+;+;+;+;+;+;+;+;+;+;+;+;+;+;+;+;+;+;+;+;+;+;+;+;+;+;+;+;+;+;+;+;+;+;+;+;+;+;+;+;+;+;+;+;+;+;+;+;+;+;+;+;+	2875	30.6671	31.7417	40.2919	39.7329	3.5687e-10	1.29962e-08	-0.340836
TTI2	8;8;8;8;8;8;8;8;8;8;8;8;8;8;8;8;8;8;8;8;8;8;8;8;8;8;8;8;8;8;8;8;8;8;8;8;8;8	33473386;33498509;33498954;33498956;33499118;33500328;33500328;33500328;33500328;33500328;33503429;33503429;33503429;33503429;33503429;33503748;33503748;33503748;33503748;33503748;33507229;33507229;33507229;33507229;33509746;33509746;33509746;33509746;33509746;33511967;33511967;33511967;33511967;33512311;33512960;33512960;33513082;33513082	33474428;33499277;33499277;33499277;33499277;33500490;33500490;33500490;33500490;33500490;33503572;33503572;33503572;33503572;33503572;33503935;33503935;33503935;33503935;33503935;33507321;33507321;33507321;33507321;33509932;33509932;33509932;33509932;33509785;33512712;33512712;33513109;33512712;33512712;33513004;33513185;33513119;33513601	-;-;-;-;-;-;-;-;-;-;-;-;-;-;-;-;-;-;-;-;-;-;-;-;-;-;-;-;-;-;-;-;-;-;-;-;-;-	4222	7.88362	8.03846	11.3134	11.691	3.83393e-10	1.38998e-08	-0.512698
P2RY2	11;11;11;11;11;11;11;11;11	73218298;73218299;73218457;73227981;73227981;73227981;73234022;73234156;73234156	73218432;73218432;73218656;73228175;73228175;73228175;73236352;73235934;73235932	+;+;+;+;+;+;+;+;+	2861	26.8438	27.0982	20.5528	20.7359	3.83511e-10	1.38998e-08	0.403624
XPOT	12;12;12;12;12;12;12;12;12;12;12;12;12;12;12;12;12;12;12;12;12;12;12;12;12;12;12;12;12;12;12;12;12;12;12;12;12;12;12;12;12;12;12;12;12;12;12;12;12;12;12;12;12	64404350;64405046;64409657;64409962;64409962;64414907;64414907;64414907;64416698;64416698;64416698;64418046;64418046;64418876;64418876;64420070;64420070;64420353;64421235;64423005;64423180;64423182;64424599;64424599;64424704;64425038;64425038;64425038;64425338;64425338;64425619;64425815;64425815;64425815;64428051;64428051;64428051;64428051;64430049;64430049;64430049;64430049;64431538;64431538;644…	64404804;64405337;64410095;64410095;64410095;64414989;64414989;64414989;64416754;64416736;64416754;64418115;64418115;64419094;64419094;64420185;64420254;64420521;64421471;64423043;64423244;64423244;64424723;64424723;64424723;64425138;64425457;64425182;64425457;64425457;64425909;64425909;64425909;64425909;64428120;64428120;64428120;64428120;64430287;64430210;64430287;64430287;64431679;64431823;644…	+;+;+;+;+;+;+;+;+;+;+;+;+;+;+;+;+;+;+;+;+;+;+;+;+;+;+;+;+;+;+;+;+;+;+;+;+;+;+;+;+;+;+;+;+;+;+;+;+;+;+;+;+	7364	47.8852	50.0987	40.1708	41.6149	3.85736e-10	1.39471e-08	0.278604
LYSMD2	15;15;15;15;15;15;15;15;15;15;15;15	51723011;51723069;51723238;51723244;51724790;51724790;51724790;51724790;51737350;51737840;51751271;51751271	51723649;51723649;51723649;51723649;51725121;51724991;51725121;51725121;51738137;51738121;51751437;51751585	-;-;-;-;-;-;-;-;-;-;-;-	2074	2.14857	2.20659	5.05971	4.82784	3.87943e-10	1.39659e-08	-1.1643
PTPMT1	11;11;11;11;11;11;11;11;11;11;11;11;11;11;11	47565430;47565458;47565599;47565601;47565898;47565906;47565906;47569700;47569700;47569700;47571471;47571471;47571471;47571471;47571471	47565986;47565986;47565796;47565796;47565986;47565986;47565986;47569891;47569891;47569891;47573461;47572119;47571769;47571927;47572360	+;+;+;+;+;+;+;+;+;+;+;+;+;+;+	2740	6.70446	7.47475	11.2255	11.0317	3.89008e-10	1.39659e-08	-0.632575
CBS	21;21;21;21;21;21;21;21;21;21;21;21;21;21;21;21;21;21;21;21;21;21;21;21;21;21;21;21;21;21;21;21;21;21;21;21;21;21;21;21;21;21;21;21;21;21;21;21;21;21;21;21;21;21;21;21;21;21;21;21;21;21;21;21;21;21;21;21;21;21;21;21;21;21;21;21;21;21;21;21;21;21;21;21;21;21;21;21;21;21;21;21;21;21;21;21;21;21;21;21;21;21;21;21;21;21;21;21;21;21;21;21;21;21;21;21;21;21;21;21;21;21;21;21;21;21;21;21;21;21;21;21;21;…	43053191;43053191;43053191;43053191;43053191;43053755;43053789;43053862;43055072;43055583;43055598;43056058;43056058;43056058;43056803;43056803;43056803;43056803;43056803;43056803;43056803;43056803;43056803;43056803;43058145;43058145;43058145;43058145;43058145;43058145;43058145;43058145;43058145;43058145;43058834;43058834;43058834;43058834;43058834;43058834;43058834;43058834;43058834;43058834;430…	43053983;43053647;43053983;43053983;43053983;43053983;43053983;43053983;43056099;43055901;43055870;43056099;43056099;43056099;43056887;43056887;43056887;43056887;43056887;43056887;43056887;43056887;43056887;43056887;43058253;43058253;43058253;43058253;43058253;43058253;43058253;43058253;43058253;43058253;43058968;43058954;43058968;43058968;43058941;43058968;43058968;43058968;43058968;43058968;430…	-;-;-;-;-;-;-;-;-;-;-;-;-;-;-;-;-;-;-;-;-;-;-;-;-;-;-;-;-;-;-;-;-;-;-;-;-;-;-;-;-;-;-;-;-;-;-;-;-;-;-;-;-;-;-;-;-;-;-;-;-;-;-;-;-;-;-;-;-;-;-;-;-;-;-;-;-;-;-;-;-;-;-;-;-;-;-;-;-;-;-;-;-;-;-;-;-;-;-;-;-;-;-;-;-;-;-;-;-;-;-;-;-;-;-;-;-;-;-;-;-;-;-;-;-;-;-;-	6786	3.70548	3.9863	2.52622	2.37609	3.89015e-10	1.39659e-08	0.667004
NRIP1	21;21;21;21;21;21;21;21;21;21;21;21;21;21;21;21;21;21;21;21;21;21;21	14961235;14961235;14961235;14967996;14968155;14987954;14988141;14991201;15002180;15014344;15014344;15014344;15043495;15043495;15043495;15043495;15043495;15064745;15064745;15064745;15065725;15065725;15065725	14968526;14968526;14968526;14968526;14968526;14988192;14988192;14991306;15002368;15014466;15014466;15014466;15043574;15043574;15043574;15043574;15043574;15065000;15064934;15064805;15065936;15065903;15065815	-;-;-;-;-;-;-;-;-;-;-;-;-;-;-;-;-;-;-;-;-;-;-	8497	4.20085	4.19147	6.49974	5.73714	3.94503e-10	1.41295e-08	-0.526723
EBNA1BP2	1;1;1;1;1;1;1;1;1;1;1;1;1;1;1;1;1;1;1;1;1;1;1;1;1;1;1;1;1;1;1;1;1;1;1;1;1;1;1;1;1;1;1;1;1;1;1;1;1;1;1;1;1	43164175;43164184;43164346;43164643;43164643;43164643;43166826;43166826;43166826;43167160;43167160;43167160;43168939;43168939;43168939;43170756;43170756;43170756;43170818;43170944;43171441;43171479;43171479;43171479;43171610;43171652;43171886;43171886;43171886;43171886;43171886;43172053;43172053;43172053;43172053;43172053;43172053;43172280;43172280;43172280;43172720;43181682;43194684;43206346;432…	43164493;43164493;43164493;43164805;43164805;43164805;43166919;43166919;43166919;43167235;43167235;43167235;43169028;43169028;43169028;43171121;43170879;43170879;43170879;43171651;43171969;43171651;43171651;43171651;43171651;43171712;43171969;43171969;43171969;43171969;43171969;43172282;43172141;43172141;43172268;43172260;43172141;43172428;43172551;43172570;43172863;43181784;43194949;43206392;432…	-;-;-;-;-;-;-;-;-;-;-;-;-;-;-;-;-;-;-;-;-;-;-;-;-;-;-;-;-;-;-;-;-;-;-;-;-;-;-;-;-;-;-;-;-;-;-;-;-;-;-;-;-	3561	30.199	29.8769	38.538	37.3591	4.02914e-10	1.43968e-08	-0.319386
SERPINB1	6;6;6;6;6;6;6;6;6;6;6;6;6;6;6;6;6;6;6;6;6;6;6;6;6	2832332;2833512;2835856;2835856;2836108;2836108;2836108;2836108;2837882;2837882;2837882;2837882;2838549;2838549;2838549;2838549;2840419;2840419;2840419;2840419;2841216;2841597;2841812;2841812;2841812	2834012;2833699;2836023;2836023;2836250;2836250;2836250;2836250;2837999;2837999;2837999;2837999;2838686;2838686;2838686;2838686;2840594;2840594;2840485;2840594;2841475;2841862;2841848;2841959;2842006	-;-;-;-;-;-;-;-;-;-;-;-;-;-;-;-;-;-;-;-;-;-;-;-;-	3094	22.5444	22.1432	16.6367	16.9865	4.04589e-10	1.44228e-08	0.428492
LBR	1;1;1;1;1;1;1;1;1;1;1;1;1;1;1;1;1;1;1;1;1;1;1;1;1;1;1;1;1;1;1;1;1;1;1;1;1;1;1;1;1;1;1;1	225401502;225401503;225403090;225404404;225404404;225404404;225404626;225404626;225406562;225406664;225406664;225410291;225410291;225410291;225411337;225411337;225411337;225412454;225412454;225415278;225415278;225417550;225417984;225417984;225419263;225419263;225419263;225419263;225419715;225419715;225419715;225419725;225422077;225422077;225422077;225422077;225423911;225423911;225423911;225423921…	225403463;225403463;225403463;225404565;225404526;225404526;225404706;225404706;225406832;225406832;225406832;225410416;225410416;225410416;225411417;225411440;225411440;225412645;225412645;225415332;225415332;225418180;225418180;225418180;225419362;225419452;225419452;225419452;225419798;225419798;225419798;225419798;225422427;225422277;225422277;225422277;225424089;225424089;225424089;225424089…	-;-;-;-;-;-;-;-;-;-;-;-;-;-;-;-;-;-;-;-;-;-;-;-;-;-;-;-;-;-;-;-;-;-;-;-;-;-;-;-;-;-;-;-	5257	21.9872	21.6516	26.7245	28.5256	4.06025e-10	1.444e-08	-0.322111
PTPN18	2;2;2;2;2;2;2;2;2;2;2;2;2;2;2;2;2;2;2;2;2;2;2;2;2;2;2;2;2;2;2;2;2;2;2;2;2;2;2;2;2;2;2;2;2;2;2;2;2;2;2;2;2;2;2;2;2;2;2;2;2;2;2;2;2;2;2;2;2;2;2;2;2;2;2;2;2;2;2;2;2;2;2;2;2;2	130356007;130356045;130356055;130356066;130356600;130358864;130358867;130358867;130358893;130358950;130359177;130359233;130359233;130359233;130359233;130359397;130359397;130359397;130359397;130359397;130359608;130359608;130359608;130359608;130362156;130368897;130369133;130369133;130369133;130369133;130369133;130369765;130369765;130369765;130369765;130369765;130369765;130370048;130370048;130370048…	130356200;130356200;130356200;130356200;130356655;130358975;130358975;130358975;130358975;130358975;130359309;130359309;130359309;130359309;130359309;130359492;130359661;130359492;130359492;130359492;130359921;130359646;130359646;130359646;130362430;130369201;130369201;130369201;130369201;130369201;130369201;130369827;130369827;130369827;130369827;130369827;130369827;130370190;130370427;130370188…	+;+;+;+;+;+;+;+;+;+;+;+;+;+;+;+;+;+;+;+;+;+;+;+;+;+;+;+;+;+;+;+;+;+;+;+;+;+;+;+;+;+;+;+;+;+;+;+;+;+;+;+;+;+;+;+;+;+;+;+;+;+;+;+;+;+;+;+;+;+;+;+;+;+;+;+;+;+;+;+;+;+;+;+;+;+	5774	18.1364	17.5157	13.9832	14.1907	4.21927e-10	1.49705e-08	0.35771
CBX6	22;22;22;22;22;22;22;22;22;22;22;22;22;22	38861450;38864229;38869572;38871480;38871480;38871692;38871692;38871692;38871902;38871902;38871902;38872122;38872122;38872122	38867201;38867147;38871546;38871546;38871546;38871757;38871757;38871757;38871945;38871945;38871945;38872216;38872249;38872314	-;-;-;-;-;-;-;-;-;-;-;-;-;-	8030	4.67732	5.10672	3.3403	3.34274	4.29155e-10	1.51915e-08	0.567664
FN1	2;2;2;2;2;2;2;2;2;2;2;2;2;2;2;2;2;2;2;2;2;2;2;2;2;2;2;2;2;2;2;2;2;2;2;2;2;2;2;2;2;2;2;2;2;2;2;2;2;2;2;2;2;2;2;2;2;2;2;2;2;2;2;2;2;2;2;2;2;2;2;2;2;2;2;2;2;2;2;2;2;2;2;2;2;2;2;2;2;2;2;2;2;2;2;2;2;2;2;2;2;2;2;2;2;2;2;2;2;2;2;2;2;2;2;2;2;2;2;2;2;2;2;2;2;2;2;2;2;2;2;2;2;2;2;2;2;2;2;2;2;2;2;2;2;2;2;2;2;2;2;2;2;2;2;2;2;2;2;2;2;2;2;2;2;2;2;2;2;2;2;2;2;2;2;2;2;2;2;2;2;2;2;2;2;2;2;2;2;2;2;2;2;2;2;2;2;2;2;2…	215360440;215360454;215360454;215360454;215360454;215360458;215360862;215360862;215360862;215360865;215360866;215360866;215361147;215361341;215361969;215361969;215361969;215361969;215361969;215361969;215361969;215361969;215361969;215361969;215361969;215361969;215361969;215361969;215364370;215364667;215364879;215364879;215364879;215364879;215364879;215364879;215364879;215364879;215364879;215364879…	215361626;215361626;215361626;215361626;215361626;215361626;215361626;215361626;215361626;215361626;215361626;215361626;215361626;215361626;215362079;215362079;215363640;215362079;215362079;215362079;215362079;215362079;215362079;215362079;215362079;215362079;215362079;215362079;215364985;215364985;215364985;215364985;215364985;215364985;215364985;215364985;215364985;215364985;215364985;215364985…	-;-;-;-;-;-;-;-;-;-;-;-;-;-;-;-;-;-;-;-;-;-;-;-;-;-;-;-;-;-;-;-;-;-;-;-;-;-;-;-;-;-;-;-;-;-;-;-;-;-;-;-;-;-;-;-;-;-;-;-;-;-;-;-;-;-;-;-;-;-;-;-;-;-;-;-;-;-;-;-;-;-;-;-;-;-;-;-;-;-;-;-;-;-;-;-;-;-;-;-;-;-;-;-;-;-;-;-;-;-;-;-;-;-;-;-;-;-;-;-;-;-;-;-;-;-;-;-	17315	0.653898	0.560016	1.03708	1.1457	4.42568e-10	1.56298e-08	-0.827401
MCM3	6;6;6;6;6;6;6;6;6;6;6;6;6;6;6;6;6;6;6;6;6;6;6;6;6;6;6;6;6;6;6;6;6;6;6;6;6;6;6;6;6;6;6;6;6;6;6;6;6;6;6;6;6;6;6;6;6;6;6;6;6;6;6;6;6;6;6;6;6;6;6;6;6;6;6;6;6;6;6;6;6;6;6;6	52264009;52264009;52264014;52264014;52264621;52265235;52266075;52266075;52266075;52266075;52266075;52266611;52266611;52266611;52266611;52266611;52267865;52267865;52267865;52267865;52267865;52269086;52269086;52269086;52269086;52269086;52272301;52272301;52272301;52272301;52272301;52273230;52273230;52273230;52273230;52273230;52273742;52273742;52273742;52273742;52273742;52275982;52276268;52276268;522…	52264786;52264786;52264786;52264786;52264786;52265385;52266144;52266144;52266144;52266144;52266144;52266696;52266696;52266696;52266696;52266696;52267968;52267968;52267968;52267968;52267968;52269226;52269226;52269226;52269226;52269226;52272451;52272451;52272451;52272451;52272451;52273356;52273356;52273356;52273356;52273356;52273775;52273916;52273916;52273916;52273916;52276476;52276476;52276476;522…	-;-;-;-;-;-;-;-;-;-;-;-;-;-;-;-;-;-;-;-;-;-;-;-;-;-;-;-;-;-;-;-;-;-;-;-;-;-;-;-;-;-;-;-;-;-;-;-;-;-;-;-;-;-;-;-;-;-;-;-;-;-;-;-;-;-;-;-;-;-;-;-;-;-;-;-;-;-;-;-;-;-;-;-	3650	78.6334	80.2697	99.0643	95.9115	4.63664e-10	1.63369e-08	-0.277286
TNRC18	7;7;7;7;7;7;7;7;7;7;7;7;7;7;7;7;7;7;7;7;7;7;7;7;7;7;7;7;7;7;7;7;7;7;7;7;7;7;7;7;7;7;7;7;7;7;7;7;7;7;7;7;7;7;7;7;7;7;7;7;7;7;7;7;7;7;7;7;7;7;7;7;7;7;7;7;7;7;7;7;7;7;7;7;7;7;7;7;7	5306790;5306800;5308875;5308875;5309132;5309132;5312503;5312503;5313111;5314980;5314984;5314984;5315956;5315956;5315956;5320140;5320318;5320318;5320318;5320532;5320532;5320532;5320532;5321073;5321073;5324214;5324214;5324222;5324247;5325096;5325096;5325096;5325096;5329937;5332622;5332622;5332622;5345562;5345562;5351819;5351819;5352002;5356916;5356916;5356916;5359398;5359398;5359398;5361594;5361594…	5308312;5308312;5308949;5308949;5309368;5309368;5313863;5313859;5313863;5315148;5315148;5315148;5316072;5316072;5316072;5320426;5320426;5320426;5320426;5320607;5320662;5320607;5320607;5321190;5321190;5324355;5324355;5324355;5324355;5325248;5325574;5325248;5325248;5329969;5332878;5333049;5333049;5345810;5345810;5352094;5352094;5352094;5357276;5357276;5357276;5359569;5359569;5359569;5361722;5361722…	-;-;-;-;-;-;-;-;-;-;-;-;-;-;-;-;-;-;-;-;-;-;-;-;-;-;-;-;-;-;-;-;-;-;-;-;-;-;-;-;-;-;-;-;-;-;-;-;-;-;-;-;-;-;-;-;-;-;-;-;-;-;-;-;-;-;-;-;-;-;-;-;-;-;-;-;-;-;-;-;-;-;-;-;-;-;-;-;-	12572	43.5937	44.2483	37.1873	36.3786	4.91984e-10	1.72946e-08	0.27377
ARHGAP11B	15;15;15;15;15;15;15;15;15;15;15;15;15;15;15;15;15;15;15;15;15;15;15;15;15;15;15;15;15;15;15;15;15;15;15;15;15;15;15;15;15;15;15;15;15;15;15;15;15;15;15;15;15;15;15;15;15;15;15;15;15;15;15	30624494;30624548;30624723;30624723;30625354;30626200;30626200;30626676;30630703;30630703;30630703;30630703;30630724;30633490;30633490;30633490;30633490;30633490;30634170;30634170;30634170;30634170;30634170;30634325;30635080;30635080;30635080;30635080;30635080;30635080;30635309;30635487;30635487;30635487;30635487;30638746;30638746;30638746;30638746;30641522;30644639;30644639;30644639;30646114;306…	30624612;30624612;30624816;30624816;30626266;30626949;30626949;30626949;30630773;30630773;30630773;30630773;30630773;30633586;30633586;30633586;30633586;30633586;30634423;30634423;30634423;30634423;30634423;30634423;30635188;30635385;30635188;30635188;30635188;30635188;30635387;30635633;30635633;30635633;30635633;30638810;30638820;30638820;30638820;30641617;30644702;30644702;30644702;30646295;306…	+;+;+;+;+;+;+;+;+;+;+;+;+;+;+;+;+;+;+;+;+;+;+;+;+;+;+;+;+;+;+;+;+;+;+;+;+;+;+;+;+;+;+;+;+;+;+;+;+;+;+;+;+;+;+;+;+;+;+;+;+;+;+	9184	13.2788	12.4182	16.2183	16.2208	5.10967e-10	1.79204e-08	-0.318023
SHOX2	3;3;3;3;3;3;3;3;3;3;3;3;3;3;3;3;3;3;3;3;3;3;3;3;3;3;3;3;3;3;3	158095954;158096011;158097080;158097159;158097183;158097600;158099856;158099860;158099860;158099860;158099860;158099885;158100254;158100254;158100254;158100254;158100254;158100254;158102678;158102678;158102678;158102678;158102678;158102678;158105058;158105058;158105058;158105679;158105679;158105679;158105679	158098284;158098320;158097133;158098320;158098284;158098284;158099948;158099948;158099948;158099948;158099948;158099948;158100311;158100311;158100311;158100311;158100311;158100311;158102886;158102886;158102886;158102887;158102886;158104142;158105125;158105129;158105294;158105718;158106160;158106503;158106050	-;-;-;-;-;-;-;-;-;-;-;-;-;-;-;-;-;-;-;-;-;-;-;-;-;-;-;-;-;-;-	5045	10.2118	10.4993	13.6727	14.536	5.23626e-10	1.83221e-08	-0.427477
FBXO39	17;17;17;17;17;17;17;17;17;17;17	6776223;6779789;6786780;6786815;6786870;6787300;6789701;6794776;6794776;6795996;6795996	6776272;6780891;6786956;6786956;6786956;6787646;6789760;6794850;6794850;6797101;6796635	+;+;+;+;+;+;+;+;+;+;+	2918	1.94786	1.72364	0.542536	0.579962	5.26922e-10	1.8395e-08	1.72493
CLIC4	1;1;1;1;1;1;1;1;1;1;1;1;1;1;1;1;1;1;1;1;1	24745357;24745382;24745382;24745409;24793177;24797742;24797742;24797742;24797742;24814094;24814094;24814094;24827010;24827010;24827010;24839860;24839860;24839860;24840773;24840773;24844129	24745625;24745625;24745625;24745625;24793213;24797963;24797851;24797851;24797851;24814219;24814219;24814219;24827116;24827116;24827116;24840041;24839907;24840041;24842587;24844324;24844267	+;+;+;+;+;+;+;+;+;+;+;+;+;+;+;+;+;+;+;+;+	4495	15.6695	15.917	12.1256	11.849	5.48606e-10	1.91081e-08	0.41556
MLEC	12;12;12;12;12;12;12;12;12;12;12;12;12;12;12;12;12	120686869;120687245;120693994;120694091;120694091;120694167;120694824;120694824;120694824;120695095;120695095;120696316;120696316;120696316;120696316;120696403;120700464	120687531;120687531;120694269;120694269;120694269;120694269;120695000;120695000;120695000;120695152;120695152;120696353;120696578;120701864;120696690;120696541;120700941	+;+;+;+;+;+;+;+;+;+;+;+;+;+;+;+;+	6723	17.7203	18.2379	22.6934	22.1795	5.71397e-10	1.98564e-08	-0.301692
[truncated: 14,749 more rows]

## Sheet: p<0.05 
Geneid	Chr	Start	End	Length	Sh1_1	Sh1_2	Scr_1	Scr_2	Sh1/Scr_PValue	Sh1/Scr_FDR	Sh1/Scr_logFC
MIR762	16	30893903	30893985	83	0.547841	1.09184	34.8777	13.593	3.81751e-08	8.43853e-07	-4.76355
FLJ37453	1;1	15834474;15848108	15836906;15848147	2473	0.404512	0.549675	4.07875	3.51665	1.63112e-17	3.93177e-15	-2.96962
CTD-2154B17.4	5;5;5;5;5	10761065;10767624;10767624;10770150;10770191	10761144;10767775;10767775;10770294;10770280	377	11.3376	13.942	85.5449	72.9452	7.94256e-25	1.20616e-21	-2.62994
[truncated: 4,911 more rows]
